# Comparative Studies of Genome-Wide Maps of Nucleosomes between Deletion Mutants of *elp3* and *hos2* Genes of *Saccharomyces cerevisiae*

Takashi Matsumoto<sup>1</sup>, Choong-Soo Yun<sup>2</sup>, Hirofumi Yoshikawa<sup>1,3</sup>, Hiromi Nishida<sup>2\*</sup>

<sup>1</sup> Genome Research Center, NODAI Research Institute, Tokyo University of Agriculture, Tokyo, Japan, <sup>2</sup> Agricultural Bioinformatics Research Unit, Graduate School of Agricultural and Life Sciences, University of Tokyo, Tokyo, Japan, <sup>3</sup> Department of Bioscience, Tokyo University of Agriculture, Tokyo, Japan

## Abstract

In order to elucidate the influence of histone acetylation upon nucleosomal DNA length and nucleosome position, we compared nucleosome maps of the following three yeast strains; strain BY4741 (control), the *elp3* (one of histone acetyltransferase genes) deletion mutant, and the *hos2* (one of histone deacetylase genes) deletion mutant of *Saccharomyces cerevisiae*. We sequenced mononucleosomal DNA fragments after treatment with micrococcal nuclease. After mapping the DNA fragments to the genome, we identified the nucleosome positions. We showed that the distributions of the nucleosomal DNA lengths of the control and the *hos2* disruptant were similar. On the other hand, the distribution of the nucleosomal DNA lengths of the *elp3* disruptant shifted toward shorter than that of the control. It strongly suggests that inhibition of Elp3-induced histone acetylation causes the nucleosomal DNA length reduction. Next, we compared the profiles of nucleosome mapping numbers in gene promoter regions between the control and the disruptant. We detected 24 genes with low conservation level of nucleosome positions in promoters between the control and the *elp3* disruptant as well as between the control and the *hos2* disruptant. It indicates that both Elp3-induced acetylation and Hos2-induced deacetylation influence the nucleosome positions in the promoters of those 24 genes. Interestingly, in 19 of the 24 genes, the profiles of nucleosome mapping numbers were similar between the two disruptants.

**Citation:** Matsumoto T, Yun C-S, Yoshikawa H, Nishida H (2011) Comparative Studies of Genome-Wide Maps of Nucleosomes between Deletion Mutants of *elp3* and *hos2* Genes of *Saccharomyces cerevisiae*. PLoS ONE 6(1): e16372. doi:10.1371/journal.pone.0016372

**Editor:** Laura Rusche, Duke University, United States of America

**Received:** September 15, 2010; **Accepted:** December 19, 2010; **Published:** January 28, 2011

**Copyright:** © 2011 Matsumoto et al. This is an open-access article distributed under the terms of the Creative Commons Attribution License, which permits unrestricted use, distribution, and reproduction in any medium, provided the original author and source are credited.

**Funding:** This study was supported in part by a grant from the Institute for Fermentation, Osaka (IFO), Japan, to HN, and by Grants-in-Aid for Scientific Research from the Ministry of Education, Culture, Sports, Science and Technology (S0801025) to HY. The funders had no role in study design, data collection and analysis, decision to publish, or preparation of the manuscript.

**Competing Interests:** The authors have declared that no competing interests exist.

\* E-mail: hnishida@iu.a.u-tokyo.ac.jp

## Introduction

Eukaryotic genomic DNA is packaged with histone proteins to form chromatin [1], the most fundamental repeating unit of which is the nucleosome [2]. The precise organization of this chromatin is of utmost importance for the maintenance of eukaryotic genomic DNA. Nucleosomes consist of an octamer of histones, around which the DNA is wrapped [3]. Neighboring nucleosomes are separated by unwrapped linker DNA.

Generally, nucleosomal histone proteins are post-translationally modified [4]. Reversible histone acetylation, which is regulated by histone acetyltransferase [5] and deacetylase [6,7], is one such modification. The acetylation and deacetylation of the core histone tails play an important role in the regulation of transcription [8,9]. Generally a histone-modifying protein complex consists of a catalytic subunit and the associated subunits. The budding yeast *Saccharomyces cerevisiae* has 62 subunits including 15 histone acetyltransferase catalytic subunits and 12 histone deacetylase catalytic subunits [10].

Although the histone proteins are so conserved among the eukaryotes, the nucleosomal DNA lengths are different among phylogenetically closed ascomycetous yeasts [11]. In addition the fission yeast *Schizosaccharomyces pombe* has the distinct nucleosome positioning mechanism from *Saccharomyces cerevisiae* [12]. Our

previous analyses indicated that the distribution of the nucleosomal DNA lengths of the filamentous ascomycete *Aspergillus fumigatus* showed 2 peaks at 135 nt and at 150 nt [13]. On the other hand, the distribution of the nucleosomal DNA lengths of *A. fumigatus* with the hyperacetylated histones induced by the histone deacetylase inhibitor trichostatin A shifted toward longer with a single peak at 168 nt [14], suggesting that hyperacetylation of histones induced to elongate the nucleosomal DNA length.

In order to elucidate the influence of histone acetylation upon the nucleosomal DNA length and the nucleosome position, we compared the nucleosome maps of the following three yeast strains; strain BY4741 (control), the *elp3* (one of histone acetyltransferase genes) disruptant, and the *hos2* (one of histone deacetylase genes) disruptant of *Saccharomyces cerevisiae*.

The Elp3 has the highest evolutionary conservation level among the fungal histone modification proteins [10]. The Elp3 is an integral subunit of elongating RNA polymerase II holoenzyme, which is involved in transcription-associated chromatin modification and remodeling [15,16]. The main acetylation sites of Elp3 are lysine 14 of histone H3 and lysine 8 of histone H4 [17]. The Hos2 has the third highest evolutionary conservation level among the fungal histone modification proteins [10]. The histone deacetylase Hos2 has at least partially overlapping substrate specificities with other histone deacetylases Rpd3 and Hos1 [18].

On the other hand, Hos2 has a different function from Rpd3; Hos2 functions as a gene activator [19,20].

## Results

### Distribution of nucleosomal DNA lengths

We identified 1578348, 789257, and 2664981 mononucleosomal DNA fragments of strain BY4741, the *elp3* deletion mutant, and the *hos2* deletion mutant, respectively. Those data (the positions of both ends of each DNA fragment) can be downloaded from [http://www.iu.a.u-tokyo.ac.jp/~hnishida/data\\_yeasts.zip](http://www.iu.a.u-tokyo.ac.jp/~hnishida/data_yeasts.zip). After excluding the completely overlapping DNA fragments, we identified 1522676, 771069, and 2427330 nucleosome positions of strain BY4741, the *elp3* disruptant, and the *hos2* disruptant, respectively. The *elp3* deletion and *hos2* deletion were confirmed using the nucleosome mapping numbers (Fig. S1). The distribution of nucleosomal DNA lengths of strain BY4741 had two peaks at 139 nt (minor) and 163 nt (major) (Fig. 1). The distribution of nucleosomal DNA lengths of the *elp3* disruptant had three peaks at 136 nt (minor), 139 nt (minor), and 160 nt (major) (Fig. 1A). The distribution of nucleosomal DNA lengths of the *hos2* disruptant had two peaks at 141 nt (minor) and 162 nt (major) (Fig. 1B).

### Comparison of conservation levels of nucleosome positions in promoters

We calculated the Pearson's correlation coefficients between the profiles of strain BY4741 (control) and the disruptant nucleosome mapping numbers in the promoters of 5869 protein-coding genes. The results were shown in Table S1. The distribution of the Pearson's correlation coefficients between the profiles of the control and the *elp3* disruptant nucleosome mapping numbers was shown in Fig. 2A. That of the Pearson's correlation coefficients between the profiles of the control and the *hos2* disruptant nucleosome mapping numbers was shown in Fig. 2B.

In this study, we used the genes with Pearson's correlation coefficient  $<0.5$  as the genes with low conservation level of nucleosome positions in promoters. Between the control and the *elp3* disruptant, 283 genes had the Pearson's correlation coefficient  $<0.5$ . Between the control and the *hos2* disruptant, 53 genes had the Pearson's correlation coefficient  $<0.5$ . We detected 24 genes with low conservation level of nucleosome positions in promoters between the control and the *elp3* disruptant as well as between the control and the *hos2* disruptant (Table S2).

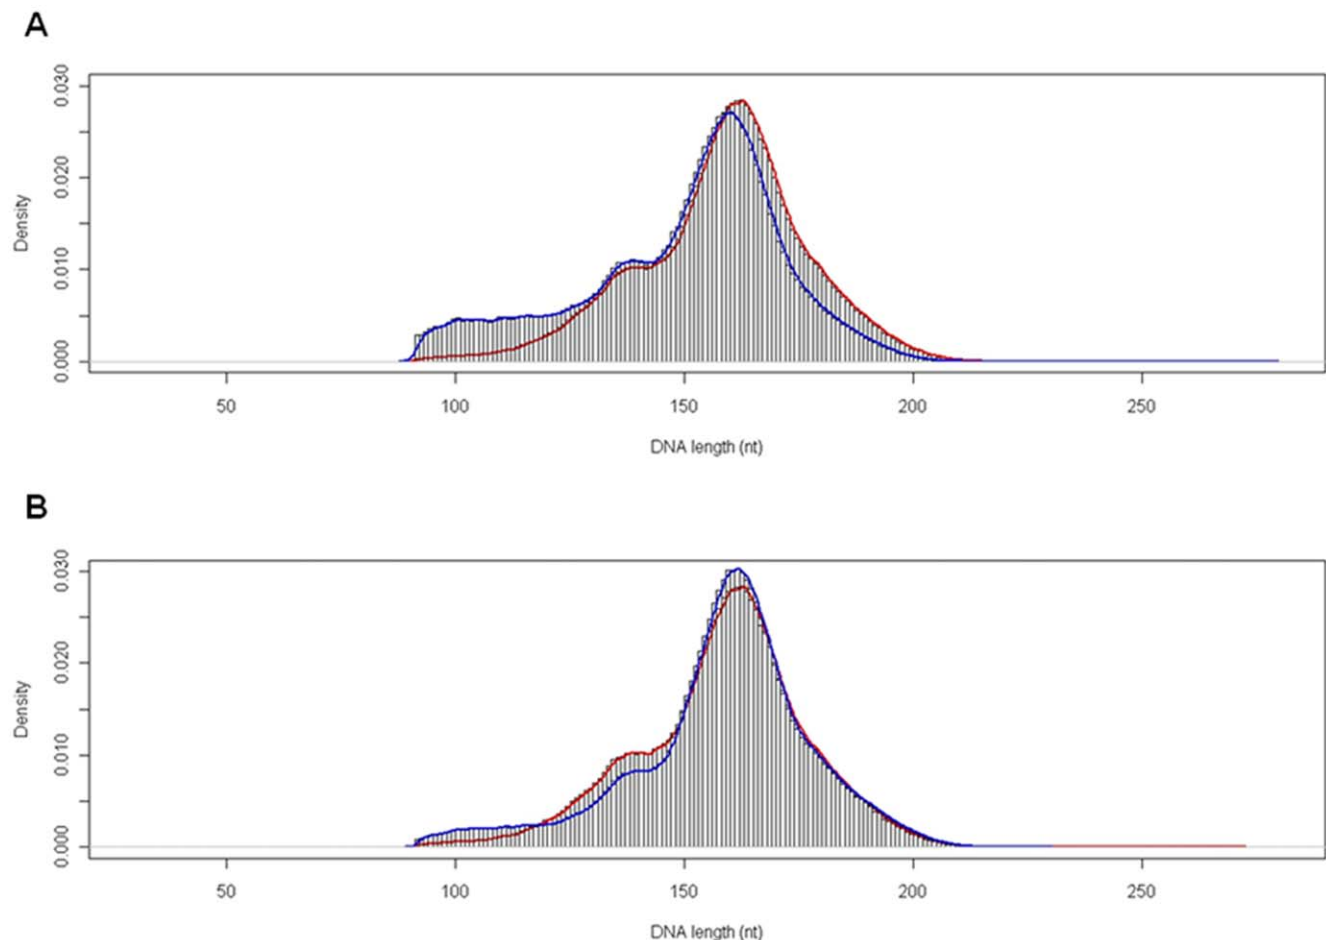

**Figure 1. Histograms of the nucleosomal DNA lengths of *Saccharomyces cerevisiae*.** (A) Red, the distribution of the nucleosomal DNA lengths of the control (strain BY4741); Blue, that of the *elp3* deletion mutant. (B) Red, the distribution of the nucleosomal DNA lengths of the control (strain BY4741); Blue, that of the *hos2* deletion mutant.

doi:10.1371/journal.pone.0016372.g001

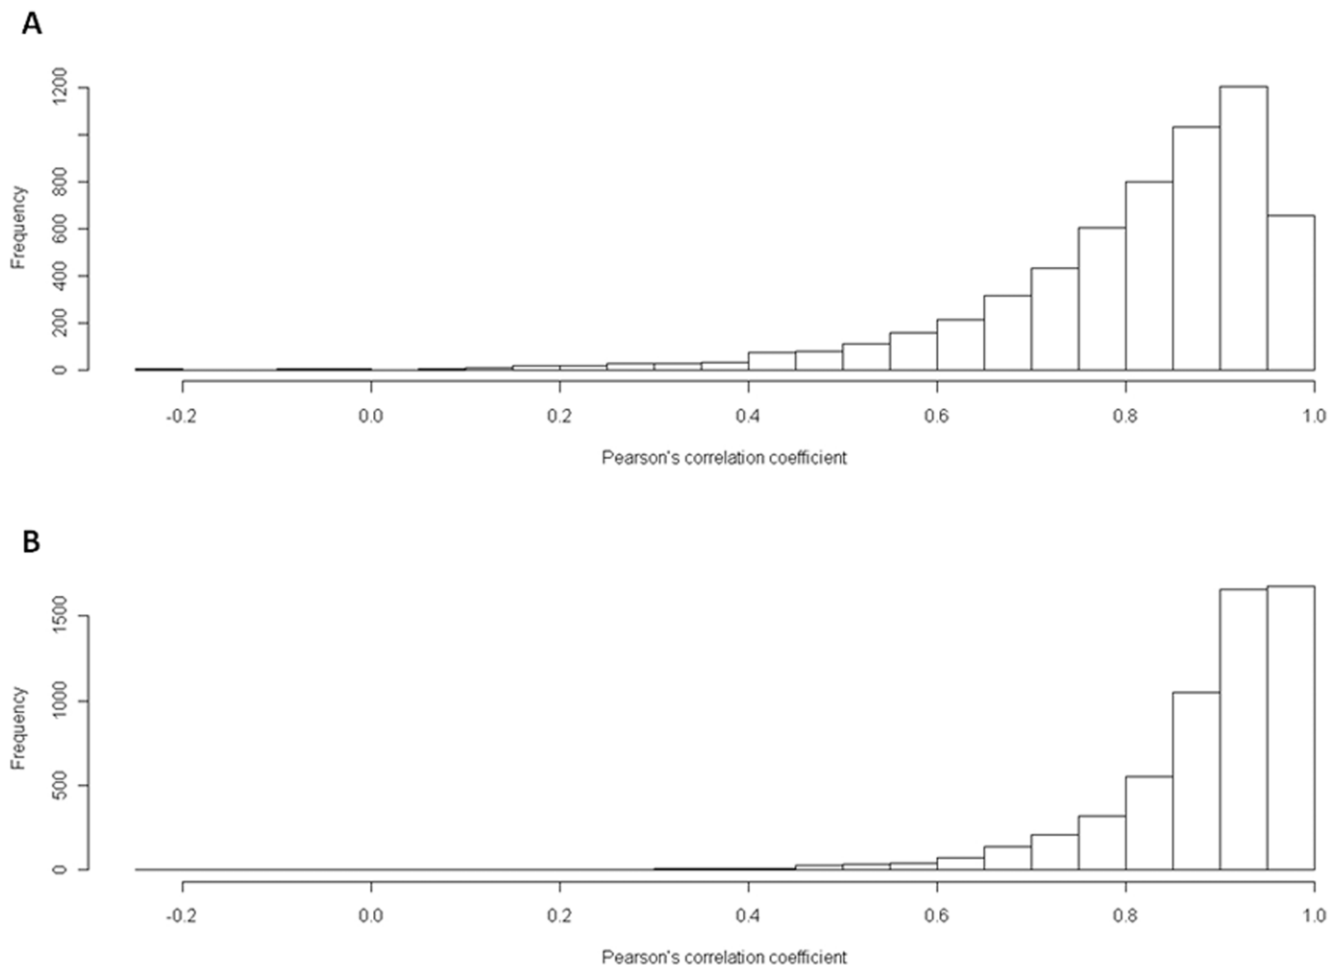

**Figure 2. Histograms of the Pearson's correlation coefficients between the profiles of the control and the disruptant nucleosome mapping numbers in the promoters of 5869 protein-coding genes.** (A) Pearson's correlation coefficients between the profiles of the control and the *elp3* deletion mutant. (B) Pearson's correlation coefficients between the profiles of the control and the *hos2* deletion mutant.  
doi:10.1371/journal.pone.0016372.g002

## Discussion

The distribution of nucleosomal DNA lengths of the control *Saccharomyces cerevisiae* (strain BY4741) had two peaks at 139 nt and 163 nt unequally (Fig. 1). The peak at 139 nt is minor and the peak at 163 nt is major. On the other hand, the distribution of nucleosomal DNA lengths of *Aspergillus fumigatus* had two peaks at 135 nt and 150 nt equivalently [13]. The distribution shape of *S. cerevisiae* nucleosomal DNA lengths is so different from that of *A. fumigatus*, suggesting that the difference of those distributions would be applied in the fungal systematics or classification.

The distribution of the nucleosomal DNA lengths of the control is similar to that of the *hos2* disruptant but is different from that of the *elp3* disruptant (Fig. 1AB). The distribution of the nucleosomal DNA lengths of the *elp3* disruptant shifted toward shorter than that of the control, strongly suggesting that inhibition of Elp3-induced histone acetylation causes the nucleosomal DNA length reduction.

In *A. fumigatus*, the hyperacetylation of core histones induced by the histone deacetylase inhibitor trichostatin A causes the nucleosomal DNA length elongation [14]. On the other hand, it seemed that inhibition of histone deacetylation by Hos2 does not influence the nucleosomal DNA length. Thus, the nucleosome map of the *hos2* disruptant of *S. cerevisiae* is consistent with the fact

that genome-wide histone acetylation level is not so different between the control and the single gene *hos2* disruptant [18].

Generally the eukaryotes have more conserved nucleosome positions in gene promoters than other regions and the histone modification in promoters plays an important role in the gene regulation [14,21–26]. In order to elucidate the relation between histone acetylation and nucleosome position, we compared the conservation level of nucleosome positions in promoters between the control and the disruptant. In the control and the two disruptants, the distributions of nucleosomal DNA lengths in the promoters were much similar to those of the whole genomes (Fig. S2).

The distributions of the Pearson's correlation coefficients between the profiles of nucleosome mapping numbers in the promoters of the control and the disruptants show that the *elp3* deletion influences the nucleosome positions in the promoters more strongly than the *hos2* deletion (Fig. 2AB). It suggests that the *hos2*-specific histone modification targets are limited. It may be related to the fact that Hos2 has at least partially overlapping substrate specificities with other histone deacetylases Rpd3 and Hos1 [18].

We detected 24 genes with low conservation level of nucleosome positions in promoters between the control and the *elp3* disruptant

as well as between the control and the *hos2* disruptant (Table S2), indicating that both Elp3-induced acetylation and Hos2-induced deacetylation influence the nucleosome positions in the promoters of the 24 genes. Although those 24 genes had the Pearson's correlation coefficient  $<0.5$  between the control and the disruptant, 19 of the 24 genes had the Pearson's correlation coefficient  $>0.5$  between the two disruptants (Table S2). In addition, in order to detect the change in RNA expression of the 24 genes, we performed quantitative RT-PCR. We detected the change in expression of 22 of the 24 genes (Fig. S3). Among the 22 genes, 16 genes were repressed in both the *elp3* and *hos2* deletion mutants (Fig. S3), suggesting that the change in nucleosome positioning induced by *elp3* or *hos2* deletion influenced RNA expression of the 16 genes.

Interestingly bidirectional promoter of histone H2A and H2B coding genes (*hta2* and *htb2*) was influenced by both the *elp3* and *hos2* deletions (Table S2, Fig. 3). The profiles of the nucleosome mapping numbers of the *elp3* and *hos2* disruptants were so similar with each other but were different from that of the control (Fig. 3). This is an example of the fact that Elp3 and Hos2 have the same effect on nucleosome positions in the promoters. More works are needed in order to elucidate the mechanism. It is hypothesized that another protein that could be acetylated by Elp3 influences nucleosome positioning.

Among the 53 genes with low conservation level of nucleosome positions in promoters between the control and the *hos2* disruptant, 24 genes (45%) had also low conservation level between the control and the *elp3* disruptant (Tables S1 and S2). It strongly suggests that Hos2 cooperates with Elp3 for the 24 gene regulations [19,20]. Our findings suggest that Hos2 functions in not only protein-coding regions [19,20] but also promoter regions.

## Materials and Methods

### Preparation of mononucleosomal DNA fragments

*Saccharomyces cerevisiae* strains used in this study are EURO-SCARF Y00000 (strain BY4741), Y02742 (*elp3* deletion mutant), and Y04561 (*hos2* deletion mutant). These strains were grown in YPD media at 30°C overnight. Each culture was diluted to an absorbance at 600 nm ( $A_{600}$ ) of 0.1/ml into 50 ml of YPD media. These 50 ml cultures were grown at 30°C to an  $A_{600}$  of 0.8/ml. Cells were collected, and resuspended in 10 ml of Zymolyase buffer (1 M sorbitol, 50 mM Tris-HCl at pH 7.4 and 10 mM  $\beta$ -mercaptoethanol). Zymolyase-20T (SEIKAGAKU BIOBUSINESS CORPORATION, Tokyo, Japan) was added to a final concentration of 0.25 mg/ml and cells were spheroplasted at 30°C while gently rolling for 30 min. After zymolyase treatment, spheroplasts were collected and resuspended in 2.5 ml of NP

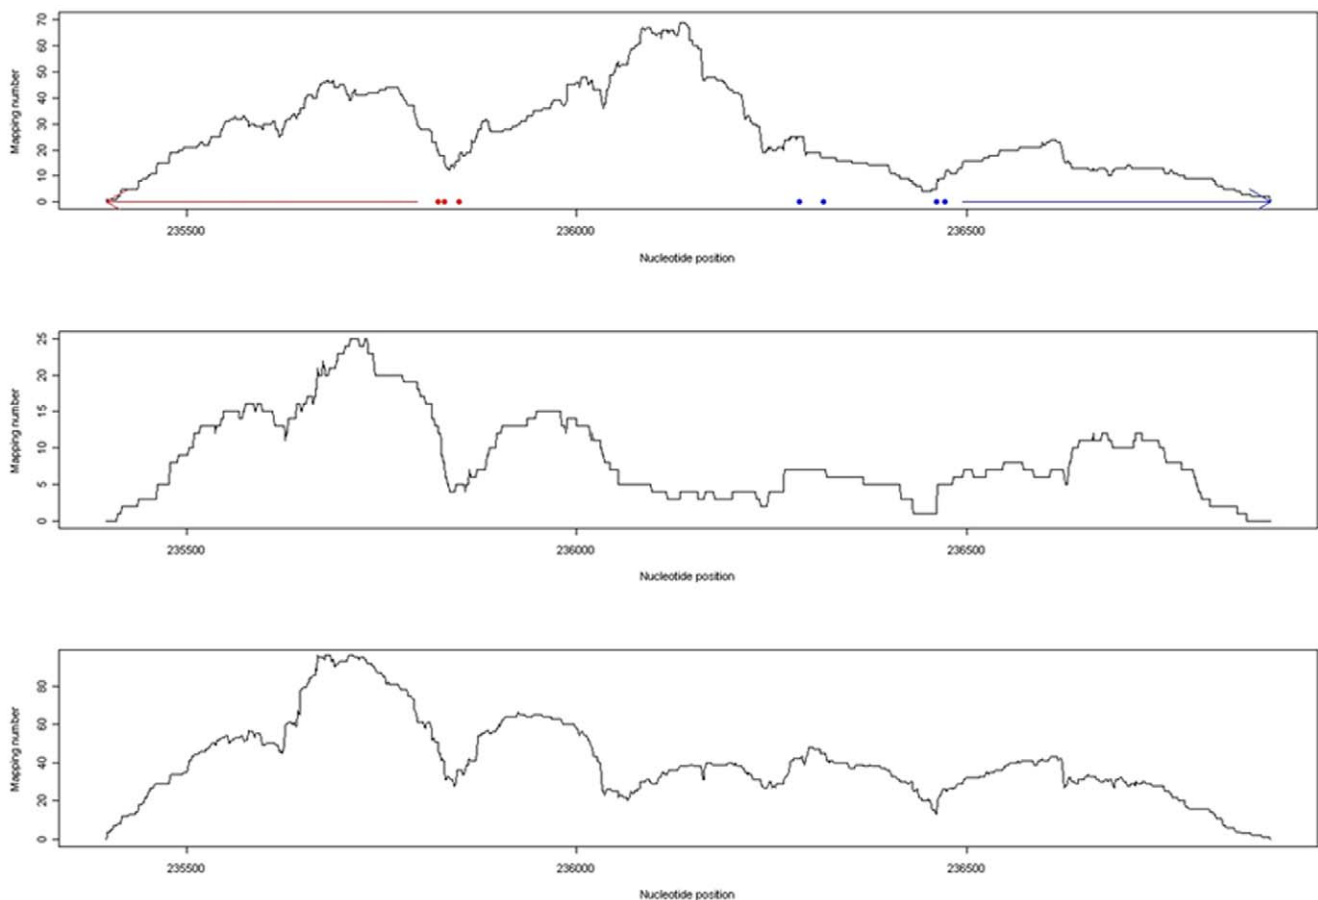

**Figure 3. Comparison of mapping numbers of the nucleosomes around *hta2* and *htb2* genes.** Top, mapping numbers of the nucleosomes of the control; Middle, mapping numbers of the nucleosomes of the *elp3* deletion mutant; Bottom, mapping numbers of the nucleosomes of the *hos2* deletion mutant. Red arrow indicates the region from the translational start site to the end of *hta2* gene (histone H2A coding). Red dots indicate the transcription start sites of *hta2*. Blue arrow indicates the region from the translational start site to the end of *htb2* gene (histone H2B coding). Blue dots indicate the transcription start sites of *htb2*. Those transcription start sites are based on the data of Miura et al. [31]. doi:10.1371/journal.pone.0016372.g003

buffer (1 M sorbitol, 50 mM NaCl, 10 mM Tris-HCl at pH 7.4, 5 mM MgCl<sub>2</sub>, 1 mM CaCl<sub>2</sub> and 0.075% Nonidet P40, with freshly added 1 mM β-mercaptoethanol and 500 μM spermidine). Spheroplasts were divided into 7 aliquots of 350 μl, and then micrococcal nuclease (MNase) (Takara Bio Inc., Shiga, Japan) was added at concentrations of 0, 0.05, 0.1, 0.25, 0.5, 0.75 and 1 U per sample. The digestion reactions were incubated at 37°C for 30 min, and were stopped by adding SDS to a final concentration of 1% and EDTA to a final concentration of 10 mM. 5 μl of proteinase K solution (20 mg/ml; QIAGEN Inc., Valencia, CA, USA) was added to each tube, and incubated at 56°C for 1 h. Samples were phenol/chloroform extracted, ethanol precipitated, and treated with RNase (Roche Diagnostics GmbH, Mannheim, Germany). To isolate the mononucleosomal DNA fragments, electrophoresis was carried out on a 2% agarose gel (Fig. S4). We used the mononucleosomal DNA fragments added at concentration of 0.75 U of MNase (Fig. S4, lane 7). The mononucleosomal DNA band was excised and purified using the QIAquick Gel Extraction Kit (QIAGEN Inc.).

### Sequencing and read mapping

The mononucleosomal DNA fragments were prepared for sequencing on a Genome Analyzer II (Illumina, Inc., San Diego, CA, USA). Libraries were generated using Multiplexing Sample Preparation Oligonucleotide Kit (Illumina, Inc.), and sequenced as paired-end 91 bp reads according to the manufacturer's protocols. Using Burrows-Wheeler Aligner [27], sequencing reads were mapped to the genome of *S. cerevisiae* S288C (GenBank accession numbers NC\_001133 to NC\_001148 and NC\_001224). The paired reads that were mapped uniquely in the proper direction, were used for the identification of nucleosome positions.

### Comparison of conservation levels of nucleosome positions in promoters

On the basis of each nucleosomal DNA fragment sequence, nucleosomal mapping numbers were estimated for each nucleotide position [28]. The gene promoter was defined as the region from 1 kb upstream of the translational start site. Pearson's correlation coefficient between the profiles of the control and the disruptant nucleosome mapping numbers at each gene promoter was calculated. Thus, when the profiles are identical, the value is 1.

### Supporting Information

**Figure S1 Mapping numbers of the nucleosomes around *elp3* and *hos2* genes.** Right side, region around *elp3*; Left side, region around *hos2*. Top, Strain BY4741 (control); Middle, The *elp3* disruptant; Bottom, The *hos2* disruptant. Arrow indicates the region from the translational start site to the end. (PPTX)

**Figure S2 Comparison between the distribution of nucleosomal DNA lengths of the whole genome and that in the gene promoters.** (A) Strain BY4741 (control). (B) The *elp3* deletion mutant. (C) The *hos2* deletion mutant. Red, the distribution of the nucleosomal DNA lengths of the whole genome; Blue, that in the gene promoters. (PPTX)

**Figure S3 Fold change of RNA expression of each gene listed in Table S2.** The following primers were used: TCCGGTGGTAAAGGTGGTAA and GAACCAATTCTCTGGGCGTA (both sequences, from 5' to 3') for transcripts of

YBL003C; GCTTCTAAATTGGCCGCTTA and GAACCAATTCTCTGGGCGTA for transcripts of YBL002W; TTCT-TGGCAAGCATTGACTG and CCCATGGCTGTACCTTT-GTT for transcripts of YBR018C; ACCAAGATGCACCGTAC-CAT and ACCAACTTGGACACGAAAAG for transcripts of YBR048W; ATGCGATCGATTTTCTTGCT and TTAAGG-CATTTCCCATCTGC for transcripts of YCR099C; TGGACC-CCAAAGAATACGAG and ACAACCGTTCCTGTTGTTCC for transcripts of YDR389W; TGAACACTTCACAGGGAGA-AA and GAAACCATGATTGGGAGACG for transcripts of YDR504C; CCTGGTCTGATCCATGCTTT and ATCATCC-GAGGAGGAGAGGT for transcripts of YDR525W-A; CCTGA-AAGAACGACCCATA and CAAAGCGTGCAGAAATCA-AA for transcripts of YER185W; GCTGGCCACAGAGAA-GAATC and ACGTCCGAGAAGAGCCACTA for transcripts of YFL033C; GGGAAATTCCTGGATCGAAT and AACGTT-TTGTTCGTGCGTTC for transcripts of YGR211W; ATCGT-CGGAGCTGAAAAAGA and GTTCAATCTGTGGGGCAT-CT for transcripts of YHR011W; CCAGATGTGCCAACT-GTGTC and GCAGCCTCAGTTTGTTCCTT for transcripts of YIL052C; AGCAGGCTCGTCAAGGTAAG and TTACC-GATACCTGGCTCACC for transcripts of YLL026W; GCAA-CATCGTGCTGAGTGAT and CACATCGTCTTTTCGGAC-TCA for transcripts of YLR438C-A; TATGCCACGTAAACC-CATT and CGAAATTGAGTGCACATGCT for transcripts of YLR464W; AGATTGAAAGGTTGCGGATG and CTCTCTT-GGCCCCAATCATA for transcripts of YMR032W; ATTCTG-CAGCAACCGCTACT and GTTAACGCCGAGTCTTCTGC for transcripts of YMR104C; CAATGCCATGGTCTGTCAAG and TAACCTTGGCAGCTTCGTCT for transcripts of YNL336W; TTATGCCAAGCCCTTAAACG and TTGGGGAAA-AGGGTGTGATA for transcripts of YNL269W; ACATC-GACCCCAAACCTCAAG and AATCCAACCGCAATTGAA-AG for transcripts of YNR062C; CCAGTATGTCCCGCA-GAAAT and GTTCGCTCGCATAAGTCACA for transcripts of YOR140W; AGGTTTTGTCCGTGGATGAC and CGCCG-AATATGTAGCCATTT for transcripts of YOR262W; AGAT-GAAAAATCGCCTGTGG and CACCTTCGGGTACTTTTC-CAA for transcripts of YOR356W; and CGGTAGATACG-CTGGTGAAGTTTC and TGGAAGATGGAGCAGTGATA-ACAAC for transcripts of TDH3. Quantification of TDH3 mRNAs were used as control for data normalization [29]. PCR amplification was performed on an ABI PRISM 7300 Real Time PCR System (Applied Biosystems). Expression was assessed by evaluating threshold cycle (Ct) values. We used median of three replicates as representative value. The relative amount of expressed RNA was calculated using Livak and Schmittgen's method [30]. The two genes *YDR504C* and *YER185W* expressions were not determined. (PPTX)

**Figure S4 Agarose gel electrophoresis of DNA fragments digested by different concentrations of MNase.** Lane 1, DNA size marker; Lane 2, MNase free; Lane 3, 0.05 U of MNase; Lane 4, 0.1 U of MNase; Lane 5, 0.25 U of MNase; Lane 6, 0.5 U of MNase; Lane 7, 0.75 U of MNase; Lane 8, 1 U of MNase. Arrows indicate the location of mononucleosomal DNA fragments. (PPTX)

**Table S1 Pearson's correlation coefficient between the profiles of the control and the disruptant nucleosome mapping numbers in each gene promoter.** (XLS)

**Table S2 Genes with low conservation level of nucleosome positions in promoters.**  
(DOCX)

## References

- Igo-Kemenes T, Hörz W, Zachau HG (1982) Chromatin. *Ann Rev Biochem* 51: 89–121.
- Luger K (2006) Dynamic nucleosomes. *Chromosome Res* 14: 5–16.
- Luger K, Mäder AW, Richmond RK, Sargent DF, Richmond TJ (1997) Crystal structure of the nucleosome core particle at 2.8 Å resolution. *Nature* 389: 251–260.
- Millar CB, Grunstein M (2006) Genome-wide patterns of histone modifications in yeast. *Nat Rev Mol Cell Biol* 7: 657–666.
- Lee KK, Workman JL (2007) Histone acetyltransferase complexes: one size doesn't fit all. *Nat Rev Mol Cell Biol* 8: 284–295.
- De Ruijter AJM, Van Gennip AH, Caron HN, Kemp S, Van Kuilenburg ABP (2003) Histone deacetylases (HDACs): characterization of the classical HDAC family. *Biochem J* 370: 737–749.
- Yang X-J, Seto E (2008) The Rpd3/Hda1 family of lysine deacetylases: from bacteria and yeast to mice and men. *Nat Rev Mol Cell Biol* 9: 206–218.
- Li B, Carey M, Workman JL (2007) The role of chromatin during transcription. *Cell* 128: 707–719.
- Luger K, Richmond TJ (1998) The histone tails of the nucleosome. *Curr Opin Genet Dev* 8: 140–146.
- Nishida H (2009) Evolutionary conservation levels of subunits of histone-modifying protein complexes in fungi. *Comp Funct Genomics* 2009: 379317.
- Tsankov AM, Thompson DA, Socha A, Regev A, Rando OJ (2010) The role of nucleosome positioning in the evolution of gene regulation. *PLoS Biol* 8: e1000414.
- Lantermann AB, Straub T, Strålfors A, Yuan G-C, Ekwall K, et al. (2010) *Schizosaccharomyces pombe* genome-wide nucleosome mapping reveals positioning mechanisms distinct from those of *Saccharomyces cerevisiae*. *Nat Struct Mol Biol* 17: 251–257.
- Nishida H, Motoyama T, Yamamoto S, Aburatani H, Osada H (2009) Genome-wide maps of mono- and di-nucleosomes of *Aspergillus fumigatus*. *Bioinformatics* 25: 2295–2297.
- Nishida H, Motoyama T, Suzuki Y, Yamamoto S, Aburatani H, et al. (2010) Genome-wide maps of mononucleosomes and dinucleosomes containing hyperacetylated histones of *Aspergillus fumigatus*. *PLoS ONE* 5: e9916.
- Wittschieben BØ, Fellows J, Du W, Stillman DJ, Svejtup JQ (2000) Overlapping roles for the histone acetyltransferase activities of SAGA and Elongator *in vivo*. *EMBO J* 19: 3060–3068.
- Wittschieben BØ, Otero G, de Bizemont T, Fellows J, Erdjument-Bromage H, et al. (1999) A novel histone acetyltransferase is an integral subunit of elongating RNA polymerase II holoenzyme. *Mol Cell* 4: 123–128.
- Winkler GS, Kristjuhan A, Erdjument-Bromage H, Tempst P, Svejtup JQ (2002) Elongator is a histone H3 and H4 acetyltransferase important for normal histone acetylation levels *in vivo*. *Proc Natl Acad Sci USA* 99: 3517–3522.
- Watson AD, Edmondson DG, Bone JR, Mukai Y, Yu Y, et al. (2000) Ssn6-Tup1 interacts with class I histone deacetylases required for repression. *Genes Dev* 14: 2737–2744.
- Wang A, Kurdistani SK, Grunstein M (2002) Requirement of Hos2 histone deacetylase for gene activity in yeast. *Science* 298: 1412–1414.
- Kurdistani SK, Grunstein M (2003) Histone acetylation and deacetylation in yeast. *Nat Rev Mol Cell Biol* 4: 276–284.
- Bernstein BE, Kamal M, Lindblad-Toh K, Bekiranov S, Bailey DK, et al. (2005) Genomic maps and comparative analysis of histone modifications in human and mouse. *Cell* 120: 169–181.
- Lee W, Tillo D, Bray N, Morse RH, Davis RW, et al. (2007) A high-resolution atlas of nucleosome occupancy in yeast. *Nat Genet* 39: 1235–1244.
- Liu CL, Kaplan T, Kim M, Buratowski S, Schreiber SL, et al. (2005) Single-nucleosome mapping of histone modifications in *S. cerevisiae*. *PLoS Biol* 3: e328.
- Nishida H, Kondo S, Suzuki T, Tsujimura Y, Komatsu S, et al. (2008) An epigenetic aberration increased in intergenic regions of cloned mice. *Mammalian Genome* 19: 667–674.
- Nishida H, Suzuki T, Kondo S, Miura H, Fujimura Y, et al. (2006) Histone H3 acetylated at lysine 9 in promoter is associated with low nucleosome density in the vicinity of transcription start site in human cell. *Chromosome Res* 14: 203–211.
- Roh TY, Cuddapah S, Zhao K (2005) Active chromatin domains are defined by acetylation islands revealed by genome-wide mapping. *Genes Dev* 19: 542–52.
- Li H, Durbin R (2009) Fast and accurate short read alignment with Burrows-Wheeler transform. *Bioinformatics* 25: 1754–1760.
- Nishida H (2009) Calculation of the ratio of the mononucleosome mapping number to the dinucleosome mapping number for each nucleotide position in the *Aspergillus fumigatus* genome. *Open Access Bioinformatics* 1: 1–6.
- Teste M-A, Duquenne M, François JM, Parrou J-L (2009) Validation of reference genes for quantitative expression analysis by real-time RT-PCR in *Saccharomyces cerevisiae*. *BMC Mol Biol* 10: 99.
- Livak KJ, Schmittgen TD (2001) Analysis of relative gene expression data using real-time quantitative PCR and  $2^{-\Delta\Delta CT}$  method. *Methods* 25: 402–408.
- Miura F, Kawaguchi N, Sese J, Toyoda A, Hattori M, et al. (2006) A large-scale full-length cDNA analysis to explore the budding yeast transcriptome. *Proc Natl Acad Sci USA* 103: 17846–17851.

## Author Contributions

Conceived and designed the experiments: HN. Performed the experiments: TM HY. Analyzed the data: TM C-SY HN. Contributed reagents/materials/analysis tools: HY HN. Wrote the paper: TM HN.
