# Supplementary material for: Comparative Studies of Genome-Wide Maps of Nucleosomes between Deletion Mutants of elp3 and hos2 Genes of Saccharomyces cerevisiae
Source: PLoS One. 2011 Jan 28;6(1):e16372. doi: 10.1371/journal.pone.0016372 (PMC3030569; doi:10.1371/journal.pone.0016372)
Supplement: Table S1 — Pearson's correlation coefficient between the profiles of the control and the disruptant nucleosome mapping numbers in each gene promoter. (XLS) [file pone.0016372.s005.xls]

## Sheet: Sheet1
Table S1. Conservation level of nucleosome positions in promoters between the control and disruptant
Chromosome	Correlation coefficient between the control and the elp3 disruptant	Correlation coefficient between the control and the hos2 disruptant	Translational start site	Transcription direction	Annotation
chr01	0.930833	0.912953	2169	-	ID=NC_001133.7:PAU8:unknown_transcript_1;Parent=NC_001133.7:PAU8;locus_tag=YAL068C;experiment=experimental evidence%2C no additional details recorded;product=Pau8p;protein_id=NP_009332.1;db_xref=SGD:S000002142;db_xref=GI:6319249;db_xref=GeneID:851229;exon
chr01	0.702009	0.634839	2480	+	locus_tag=YAL067W-A;note=Yal067w-ap;inference=non-experimental evidence%2C no additional details recorded;product=Putative protein of unknown function%3B identified by gene-trapping%2C microarray-based expression analysis%2C and genome-wide homology searc
chr01	0.900854	0.923243	9017	-	ID=NC_001133.7:SEO1:unknown_transcript_1;Parent=NC_001133.7:SEO1;locus_tag=YAL067C;note=Seo1p;experiment=experimental evidence%2C no additional details recorded;product=Putative permease%2C member of the allantoate transporter subfamily of the major facil
chr01	0.871101	0.969614	11952	-	locus_tag=YAL065C;note=Yal065cp;inference=non-experimental evidence%2C no additional details recorded;product=Putative protein of unknown function%3B has homology to FLO1%3B possible pseudogene;protein_id=NP_009335.1;db_xref=SGD:S000001817;db_xref=GI:6319
chr01	0.97472	0.965814	12047	+	locus_tag=YAL064W-B;note=Yal064w-bp;inference=non-experimental evidence%2C no additional details recorded;product=Fungal-specific protein of unknown function;protein_id=NP_009336.1;db_xref=SGD:S000002141;db_xref=GI:6319253;db_xref=GeneID:851233;exon_numbe
chr01	0.764363	0.906655	13744	-	locus_tag=YAL064C-A;gene_synonym=YAL065C-A;note=Yal064c-ap;inference=non-experimental evidence%2C no additional details recorded;product=Putative protein of unknown function%3B YAL064C-A is not an essential gene;protein_id=NP_058136.1;db_xref=SGD:S0000021
chr01	0.831165	0.848544	21526	+	locus_tag=YAL064W;note=Yal064wp;inference=non-experimental evidence%2C no additional details recorded;product=Protein of unknown function%3B may interact with ribosomes%2C based on co-purification experiments;protein_id=NP_009337.1;db_xref=SGD:S000000060;
chr01	0.770758	0.905574	22687	-	locus_tag=YAL063C-A;note=Yal063c-ap;inference=non-experimental evidence%2C no additional details recorded;product=Putative protein of unknown function%3B identified by expression profiling and mass spectrometry;protein_id=NP_878039.1;db_xref=SGD:S00002881
chr01	0.730043	0.904843	27969	-	ID=NC_001133.7:FLO9:unknown_transcript_1;Parent=NC_001133.7:FLO9;locus_tag=YAL063C;note=Lectin-like protein with similarity to Flo1p%2C thought to be expressed and involved in flocculation;experiment=experimental evidence%2C no additional details recorded
chr01	0.895045	0.788401	31568	+	ID=NC_001133.7:GDH3:unknown_transcript_1;Parent=NC_001133.7:GDH3;locus_tag=YAL062W;gene_synonym=FUN51;EC_number=1.4.1.4;note=NADP%28%2B%29-dependent glutamate dehydrogenase%2C synthesizes glutamate from ammonia and alpha-ketoglutarate%3B rate of alpha-ket
chr01	0.817378	0.963831	33449	+	ID=NC_001133.7:BDH2:unknown_transcript_1;Parent=NC_001133.7:BDH2;locus_tag=YAL061W;note=Putative medium-chain alcohol dehydrogenase with similarity to BDH1%3B transcription induced by constitutively active PDR1 and PDR3%3B BDH2 is an essential gene;experi
chr01	0.759699	0.908087	35156	+	ID=NC_001133.7:BDH1:unknown_transcript_1;Parent=NC_001133.7:BDH1;locus_tag=YAL060W;note=NAD-dependent %28R%2CR%29-butanediol dehydrogenase%2C catalyzes oxidation of %28R%2CR%29-2%2C3-butanediol to %283R%29-acetoin%2C oxidation of meso-butanediol to %283S%
chr01	0.52242	0.53656	36510	+	ID=NC_001133.7:ECM1:unknown_transcript_1;Parent=NC_001133.7:ECM1;locus_tag=YAL059W;note=Protein of unknown function%2C localized in the nucleoplasm and the nucleolus%2C genetically interacts with MTR2 in 60S ribosomal protein subunit export;experiment=exp
chr01	0.888448	0.890352	37465	+	ID=NC_001133.7:CNE1:unknown_transcript_1;Parent=NC_001133.7:CNE1;locus_tag=YAL058W;gene_synonym=FUN48;note=Cne1p;experiment=experimental evidence%2C no additional details recorded;product=Calnexin%3B integral membrane ER chaperone involved in folding and
chr01	0.989801	0.982157	39260	+	ID=NC_001133.7:GPB2:unknown_transcript_1;Parent=NC_001133.7:GPB2;locus_tag=YAL056W;gene_synonym=KRH1;note=Multistep regulator of cAMP-PKA signaling%3B inhibits PKA downstream of Gpa2p and Cyr1p%2C thereby increasing cAMP dependency%3B inhibits Ras activit
chr01	0.904506	0.868515	42178	+	ID=NC_001133.7:PEX22:unknown_transcript_1;Parent=NC_001133.7:PEX22;locus_tag=YAL055W;gene_synonym=YAF5;note=Putative peroxisomal membrane protein required for import of peroxisomal proteins%2C functionally complements a Pichia pastoris pex22 mutation;expe
chr01	0.778562	0.881795	45023	-	ID=NC_001133.7:ACS1:unknown_transcript_1;Parent=NC_001133.7:ACS1;locus_tag=YAL054C;gene_synonym=FUN44;EC_number=6.2.1.1;note=Acs1p;experiment=experimental evidence%2C no additional details recorded;product=Acetyl-coA synthetase isoform which%2C along with
chr01	0.440104	0.777937	45900	+	ID=NC_001133.7:FLC2:unknown_transcript_1;Parent=NC_001133.7:FLC2;locus_tag=YAL053W;note=Putative FAD transporter%3B required for uptake of FAD into endoplasmic reticulum%3B involved in cell wall maintenance;experiment=experimental evidence%2C no additiona
chr01	0.848174	0.921786	48565	+	ID=NC_001133.7:OAF1:unknown_transcript_1;Parent=NC_001133.7:OAF1;locus_tag=YAL051W;gene_synonym=YAF1;note=Oleate-activated transcription factor%2C acts alone and as a heterodimer with Pip2p%3B activates genes involved in beta-oxidation of fatty acids and
chr01	0.784667	0.915738	52596	-	ID=NC_001133.7:AIM2:unknown_transcript_1;Parent=NC_001133.7:AIM2;locus_tag=YAL049C;note=Cytoplasmic protein of unknown function%2C potential Hsp82p interactor%3B null mutant displays decreased frequency of mitochondrial genome loss %28petite formation%29;
chr01	0.890034	0.890739	54790	-	ID=NC_001133.7:GEM1:unknown_transcript_1;Parent=NC_001133.7:GEM1;locus_tag=YAL048C;gene_synonym=GON1;note=Gem1p;experiment=experimental evidence%2C no additional details recorded;product=Evolutionarily-conserved tail-anchored outer mitochondrial membrane
chr01	0.950244	0.953129	56858	-	ID=NC_001133.7:SPC72:unknown_transcript_1;Parent=NC_001133.7:SPC72;locus_tag=YAL047C;gene_synonym=LDB4;note=Spc72p;experiment=experimental evidence%2C no additional details recorded;product=Component of the cytoplasmic Tub4p %28gamma-tubulin%29 complex%2C
chr01	0.825682	0.800855	57386	-	ID=NC_001133.7:AIM1:unknown_transcript_1;Parent=NC_001133.7:AIM1;locus_tag=YAL046C;note=Putative protein of unknown function%3B null mutant displays increased frequency of mitochondrial genome loss %28petite formation%29;experiment=experimental evidence%2
chr01	0.948837	0.979252	57519	+	locus_tag=YAL044W-A;note=Yal044w-ap;inference=non-experimental evidence%2C no additional details recorded;product=Putative protein of unknown function%3B similar to S. pombe uvi31 which is a putative DNA repair protein;protein_id=NP_075206.1;db_xref=SGD:S
chr01	0.930239	0.947411	58463	-	ID=NC_001133.7:GCV3:unknown_transcript_1;Parent=NC_001133.7:GCV3;locus_tag=YAL044C;note=H subunit of the mitochondrial glycine decarboxylase complex%2C required for the catabolism of glycine to 5%2C10-methylene-THF%3B expression is regulated by levels of
chr01	0.809538	0.841954	61053	-	ID=NC_001133.7:PTA1:unknown_transcript_1;Parent=NC_001133.7:PTA1;locus_tag=YAL043C;gene_synonym=FUN39;note=Subunit of holo-CPF%2C a multiprotein complex and functional homolog of mammalian CPSF%2C required for the cleavage and polyadenylation of mRNA and
chr01	0.92971	0.98395	61317	+	ID=NC_001133.7:ERV46:unknown_transcript_1;Parent=NC_001133.7:ERV46;locus_tag=YAL042W;gene_synonym=FUN9;note=Protein localized to COPII-coated vesicles%2C forms a complex with Erv41p%3B involved in the membrane fusion stage of transport;experiment=experime
chr01	0.90199	0.803093	62841	+	ID=NC_001133.7:CDC24:unknown_transcript_1;Parent=NC_001133.7:CDC24;locus_tag=YAL041W;gene_synonym=CLS4;note=Guanine nucleotide exchange factor %28GEF or GDP-release factor%29 for Cdc42p%3B required for polarity establishment and maintenance%2C and mutants
chr01	0.322304	0.529876	67521	-	ID=NC_001133.7:CLN3:unknown_transcript_1;Parent=NC_001133.7:CLN3;locus_tag=YAL040C;gene_synonym=WHI1;gene_synonym=FUN10;gene_synonym=DAF1;note=G1 cyclin involved in cell cycle progression%3B activates Cdc28p kinase to promote the G1 to S phase transition%
chr01	0.854631	0.931797	69526	-	ID=NC_001133.7:CYC3:unknown_transcript_1;Parent=NC_001133.7:CYC3;locus_tag=YAL039C;EC_number=4.4.1.17;note=Cytochrome c heme lyase %28holocytochrome c synthase%29%2C attaches heme to apo-cytochrome c %28Cyc1p or Cyc7p%29 in the mitochondrial intermembrane
chr01	0.673093	0.789147	71787	+	ID=NC_001133.7:CDC19:unknown_transcript_1;Parent=NC_001133.7:CDC19;locus_tag=YAL038W;gene_synonym=PYK1;EC_number=2.7.1.40;note=Pyruvate kinase%2C functions as a homotetramer in glycolysis to convert phosphoenolpyruvate to pyruvate%2C the input for aerobic
chr01	0.867093	0.832	73519	-	locus_tag=YAL037C-A;note=Yal037c-ap;inference=non-experimental evidence%2C no additional details recorded;product=Putative protein of unknown function;protein_id=NP_878040.1;db_xref=SGD:S000028732;db_xref=GI:33438756;db_xref=GeneID:1466428;exon_number=1
chr01	0.798443	0.804656	74021	+	locus_tag=YAL037W;note=Yal037wp;inference=non-experimental evidence%2C no additional details recorded;product=Putative protein of unknown function;protein_id=NP_009363.1;db_xref=SGD:S000000035;db_xref=GI:6319280;db_xref=GeneID:851194;exon_number=1
chr01	0.764522	0.85734	76153	-	ID=NC_001133.7:RBG1:unknown_transcript_1;Parent=NC_001133.7:RBG1;locus_tag=YAL036C;gene_synonym=FUN11;note=Rbg1p;experiment=experimental evidence%2C no additional details recorded;product=Member of the DRG family of GTP-binding proteins%3B interacts with
chr01	0.830942	0.97017	76428	+	ID=NC_001133.7:FUN12:unknown_transcript_1;Parent=NC_001133.7:FUN12;locus_tag=YAL035W;gene_synonym=yIF2;note=GTPase%2C required for general translation initiation by promoting Met-tRNAiMet binding to ribosomes and ribosomal subunit joining%3B homolog of ba
chr01	0.709848	0.823394	79719	+	ID=NC_001133.7:MTW1:unknown_transcript_1;Parent=NC_001133.7:MTW1;locus_tag=YAL034W-A;gene_synonym=NSL2;gene_synonym=DSN3;note=Mtw1p;experiment=experimental evidence%2C no additional details recorded;product=Essential component of the MIND kinetochore comp
chr01	0.58996	0.77468	81952	-	ID=NC_001133.7:FUN19:unknown_transcript_1;Parent=NC_001133.7:FUN19;locus_tag=YAL034C;note=Non-essential protein of unknown function;experiment=experimental evidence%2C no additional details recorded;product=Fun19p;protein_id=NP_009368.2;db_xref=SGD:S00000
chr01	0.566905	0.55759	82707	+	ID=NC_001133.7:POP5:unknown_transcript_1;Parent=NC_001133.7:POP5;locus_tag=YAL033W;gene_synonym=FUN53;note=Subunit of both RNase MRP%2C which cleaves pre-rRNA%2C and nuclear RNase P%2C which cleaves tRNA precursors to generate mature 5%27 ends;experiment=
chr01	0.943634	0.975406	84475	-	ID=NC_001133.7:PRP45:unknown_transcript_1;Parent=NC_001133.7:PRP45;locus_tag=YAL032C;gene_synonym=FUN20;note=Prp45p;experiment=experimental evidence%2C no additional details recorded;product=Protein required for pre-mRNA splicing%3B associates with the sp
chr01	0.979104	0.866545	87032	-	ID=NC_001133.7:GIP4:unknown_transcript_1;Parent=NC_001133.7:GIP4;locus_tag=YAL031C;gene_synonym=FUN21;note=Gip4p;experiment=experimental evidence%2C no additional details recorded;product=Cytoplasmic Glc7-interacting protein whose overexpression relocaliz
chr01	0.788674	0.863757	87287	+	ID=NC_001133.7:SNC1:unknown_transcript_1;Parent=NC_001133.7:SNC1;locus_tag=YAL030W;note=Vesicle membrane receptor protein %28v-SNARE%29 involved in the fusion between Golgi-derived secretory vesicles with the plasma membrane%3B proposed to be involved in
chr01	0.659579	0.815459	92271	-	ID=NC_001133.7:MYO4:unknown_transcript_1;Parent=NC_001133.7:MYO4;locus_tag=YAL029C;gene_synonym=SHE1;gene_synonym=FUN22;note=One of two type V myosin motors %28along with MYO2%29 involved in actin-based transport of cargos%3B required for mRNA transport%2
chr01	0.842944	0.932144	92901	+	ID=NC_001133.7:FRT2:unknown_transcript_1;Parent=NC_001133.7:FRT2;locus_tag=YAL028W;gene_synonym=HPH2;note=Tail-anchored endoplasmic reticulum membrane protein%2C interacts with homolog Frt1p but is not a substrate of calcineurin %28unlike Frt1p%29%2C prom
chr01	0.650094	0.853893	94688	+	ID=NC_001133.7:SAW1:unknown_transcript_1;Parent=NC_001133.7:SAW1;locus_tag=YAL027W;note=Saw1p;experiment=experimental evidence%2C no additional details recorded;product=Putative protein of unknown function%3B green fluorescent protein %28GFP%29-fusion pro
chr01	0.803689	0.792865	99698	-	ID=NC_001133.7:DRS2:unknown_transcript_1;Parent=NC_001133.7:DRS2;locus_tag=YAL026C;gene_synonym=SWA3;gene_synonym=FUN38;EC_number=3.6.3.8;note=Drs2p;experiment=experimental evidence%2C no additional details recorded;product=Aminophospholipid translocase %
chr01	0.775519	0.970976	101146	-	ID=NC_001133.7:MAK16:unknown_transcript_1;Parent=NC_001133.7:MAK16;locus_tag=YAL025C;note=Mak16p;experiment=experimental evidence%2C no additional details recorded;product=Essential nuclear protein%2C constituent of 66S pre-ribosomal particles%3B required
chr01	0.846054	0.835885	105873	-	ID=NC_001133.7:LTE1:unknown_transcript_1;Parent=NC_001133.7:LTE1;locus_tag=YAL024C;gene_synonym=MSI2;note=Putative GDP%2FGTP exchange factor required for mitotic exit at low temperatures%3B acts as a guanine nucleotide exchange factor %28GEF%29 for Tem1p%
chr01	0.944087	0.943348	108552	-	ID=NC_001133.7:PMT2:unknown_transcript_1;Parent=NC_001133.7:PMT2;locus_tag=YAL023C;gene_synonym=FUN25;EC_number=2.4.1.109;note=Protein O-mannosyltransferase%2C transfers mannose residues from dolichyl phosphate-D-mannose to protein serine%2Fthreonine resi
chr01	0.828713	0.96139	110431	-	ID=NC_001133.7:FUN26:unknown_transcript_1;Parent=NC_001133.7:FUN26;locus_tag=YAL022C;note=Nucleoside transporter with broad nucleoside selectivity%3B localized to intracellular membranes;experiment=experimental evidence%2C no additional details recorded;p
chr01	0.829865	0.873494	113360	-	ID=NC_001133.7:CCR4:unknown_transcript_1;Parent=NC_001133.7:CCR4;locus_tag=YAL021C;gene_synonym=NUT21;gene_synonym=FUN27;note=Component of the CCR4-NOT transcriptional complex%2C which is involved in regulation of gene expression%3B component of the major
chr01	0.777614	0.854633	114616	-	ID=NC_001133.7:ATS1:unknown_transcript_1;Parent=NC_001133.7:ATS1;locus_tag=YAL020C;gene_synonym=KTI13;gene_synonym=FUN28;note=Protein required%2C with Elongator complex%2C Kti11p%2C and Kti12p%2C for modification of wobble nucleosides in tRNA%3B has a pot
chr01	0.971847	0.943755	114920	+	ID=NC_001133.7:FUN30:unknown_transcript_1;Parent=NC_001133.7:FUN30;locus_tag=YAL019W;note=Protein whose overexpression affects chromosome stability%2C potential Cdc28p substrate%3B homolog of Snf2p%3B the authentic%2C non-tagged protein is detected in hig
chr01	0.756884	0.682873	119542	-	locus_tag=YAL018C;note=Yal018cp;inference=non-experimental evidence%2C no additional details recorded;product=Putative protein of unknown function;protein_id=NP_009384.1;db_xref=SGD:S000000016;db_xref=GI:6319301;db_xref=GeneID:851215;exon_number=1
chr01	0.757952	0.935094	120226	+	ID=NC_001133.7:PSK1:unknown_transcript_1;Parent=NC_001133.7:PSK1;locus_tag=YAL017W;gene_synonym=FUN31;EC_number=2.7.1.-;note=Psk1p;experiment=experimental evidence%2C no additional details recorded;product=One of two %28see also PSK2%29 PAS domain contain
chr01	0.923048	0.818391	124880	+	ID=NC_001133.7:TPD3:unknown_transcript_1;Parent=NC_001133.7:TPD3;locus_tag=YAL016W;gene_synonym=FUN32;note=Tpd3p;experiment=experimental evidence%2C no additional details recorded;product=Regulatory subunit A of the heterotrimeric protein phosphatase 2A%2
chr01	0.82593	0.927322	128103	-	ID=NC_001133.7:NTG1:unknown_transcript_1;Parent=NC_001133.7:NTG1;locus_tag=YAL015C;gene_synonym=SCR1;gene_synonym=FUN33;note=Ntg1p;experiment=experimental evidence%2C no additional details recorded;product=DNA N-glycosylase and apurinic%2Fapyrimidinic %28
chr01	0.801975	0.948641	129020	-	ID=NC_001133.7:SYN8:unknown_transcript_1;Parent=NC_001133.7:SYN8;locus_tag=YAL014C;gene_synonym=SLT2;gene_synonym=UIP2;note=Syn8p;experiment=experimental evidence%2C no additional details recorded;product=Endosomal SNARE related to mammalian syntaxin 8;pr
chr01	0.937073	0.970033	129271	+	ID=NC_001133.7:DEP1:unknown_transcript_1;Parent=NC_001133.7:DEP1;locus_tag=YAL013W;gene_synonym=FUN54;note=Transcriptional modulator involved in regulation of structural phospholipid biosynthesis genes and metabolically unrelated genes%2C as well as maint
chr01	0.891613	0.917134	130802	+	ID=NC_001133.7:CYS3:unknown_transcript_1;Parent=NC_001133.7:CYS3;locus_tag=YAL012W;gene_synonym=STR1;gene_synonym=FUN35;gene_synonym=CYI1;EC_number=4.4.1.1;note=Cystathionine gamma-lyase%2C catalyzes one of the two reactions involved in the transsulfurati
chr01	0.893826	0.889033	132202	+	ID=NC_001133.7:SWC3:unknown_transcript_1;Parent=NC_001133.7:SWC3;locus_tag=YAL011W;gene_synonym=SWC1;note=Swc3p;experiment=experimental evidence%2C no additional details recorded;product=Protein of unknown function%2C component of the SWR1 complex%2C whic
chr01	0.890741	0.894657	135667	-	ID=NC_001133.7:MDM10:unknown_transcript_1;Parent=NC_001133.7:MDM10;locus_tag=YAL010C;gene_synonym=FUN37;note=Subunit of both the Mdm10-Mdm12-Mmm1 complex and the mitochondrial sorting and assembly machinery %28SAM complex%29%3B functions in both the gener
chr01	0.814801	0.975267	135856	+	ID=NC_001133.7:SPO7:unknown_transcript_1;Parent=NC_001133.7:SPO7;locus_tag=YAL009W;note=Spo7p;experiment=experimental evidence%2C no additional details recorded;product=Regulatory subunit of Nem1p-Spo7p phosphatase holoenzyme%2C which regulates nuclear gr
chr01	0.726328	0.842859	136916	+	ID=NC_001133.7:FUN14:unknown_transcript_1;Parent=NC_001133.7:FUN14;locus_tag=YAL008W;note=Mitochondrial protein of unknown function;experiment=experimental evidence%2C no additional details recorded;product=Fun14p;protein_id=NP_009394.1;db_xref=SGD:S00000
chr01	0.872103	0.787849	138347	-	ID=NC_001133.7:ERP2:unknown_transcript_1;Parent=NC_001133.7:ERP2;locus_tag=YAL007C;note=Protein that forms a heterotrimeric complex with Erp1p%2C Emp24p%2C and Erv25p%3B member%2C along with Emp24p and Erv25p%2C of the p24 family involved in ER to Golgi t
chr01	0.631791	0.598739	141433	-	ID=NC_001133.7:SSA1:unknown_transcript_1;Parent=NC_001133.7:SSA1;locus_tag=YAL005C;gene_synonym=YG100;note=Ssa1p;experiment=experimental evidence%2C no additional details recorded;product=ATPase involved in protein folding and nuclear localization signal
chr01	0.851053	0.745632	142176	+	ID=NC_001133.7:EFB1:unknown_transcript_1;Parent=NC_001133.7:EFB1;locus_tag=YAL003W;gene_synonym=TEF5;note=Translation elongation factor 1 beta%3B stimulates nucleotide exchange to regenerate EF-1 alpha-GTP for the next elongation cycle%3B part of the EF-1
chr01	0.721337	0.673662	143709	+	ID=NC_001133.7:VPS8:unknown_transcript_1;Parent=NC_001133.7:VPS8;locus_tag=YAL002W;gene_synonym=VPT8;gene_synonym=FUN15;note=Vps8p;experiment=experimental evidence%2C no additional details recorded;product=Membrane-associated protein that interacts with V
chr01	0.565276	0.877588	151168	-	ID=NC_001133.7:TFC3:unknown_transcript_1;Parent=NC_001133.7:TFC3;locus_tag=YAL001C;gene_synonym=TSV115;gene_synonym=FUN24;note=Tfc3p;experiment=experimental evidence%2C no additional details recorded;product=Largest of six subunits of the RNA polymerase I
chr01	0.595201	0.889605	152259	+	ID=NC_001133.7:NUP60:unknown_transcript_1;Parent=NC_001133.7:NUP60;locus_tag=YAR002W;note=Subunit of the nuclear pore complex %28NPC%29%2C functions to anchor Nup2p to the NPC in a process controlled by the nucleoplasmic concentration of Gsp1p-GTP%3B pote
chr01	0.917771	0.961999	154726	-	ID=NC_001133.7:ERP1:unknown_transcript_1;Parent=NC_001133.7:ERP1;locus_tag=YAR002C-A;note=Protein that forms a heterotrimeric complex with Erp2p%2C Emp24p%2C and Erv25p%3B member%2C along with Emp24p and Erv25p%2C of the p24 family involved in ER to Golgi
chr01	0.858388	0.911063	155007	+	ID=NC_001133.7:SWD1:unknown_transcript_1;Parent=NC_001133.7:SWD1;locus_tag=YAR003W;gene_synonym=SAF49;gene_synonym=CPS50;gene_synonym=FUN16;note=Swd1p;experiment=experimental evidence%2C no additional details recorded;product=Subunit of the COMPASS %28Set
chr01	0.908619	0.957838	158621	-	ID=NC_001133.7:RFA1:unknown_transcript_1;Parent=NC_001133.7:RFA1;locus_tag=YAR007C;gene_synonym=RPA1;gene_synonym=FUN3;gene_synonym=BUF2;note=Subunit of heterotrimeric Replication Protein A %28RPA%29%2C which is a highly conserved single-stranded DNA bind
chr01	0.90857	0.967642	158967	+	ID=NC_001133.7:SEN34:unknown_transcript_1;Parent=NC_001133.7:SEN34;locus_tag=YAR008W;gene_synonym=FUN4;EC_number=3.1.27.9;note=Subunit of the tRNA splicing endonuclease%2C which is composed of Sen2p%2C Sen15p%2C Sen34p%2C and Sen54p%3B Sen34p contains the
chr01	NA	NA	164188	-	locus_tag=YAR009C;note=Yar009cp;inference=non-experimental evidence%2C no additional details recorded;product=Retrotransposon TYA Gag and TYB Pol genes%3B in YARCTY1-1 TYB is mutant and probably non-functional;protein_id=NP_009406.1;db_xref=SGD:S000000067
chr01	0.949205	0.966857	165867	-	locus_tag=YAR010C;note=Yar010cp;inference=non-experimental evidence%2C no additional details recorded;product=Retrotransposon TYA Gag gene co-transcribed with TYB Pol%3B in YARCTY1-1 TYB is mutant and probably non-functional;protein_id=NP_009407.1;db_xref
chr01	0.890302	0.960968	168866	-	ID=NC_001133.7:BUD14:unknown_transcript_1;Parent=NC_001133.7:BUD14;locus_tag=YAR014C;note=Protein involved in bud-site selection%2C Bud14p-Glc7p complex functions as a cortical regulator of dynein%3B diploid mutants display a random budding pattern instea
chr01	0.861689	0.812955	169370	+	ID=NC_001133.7:ADE1:unknown_transcript_1;Parent=NC_001133.7:ADE1;locus_tag=YAR015W;EC_number=6.3.2.6;note=N-succinyl-5-aminoimidazole-4-carboxamide ribotide %28SAICAR%29 synthetase%2C required for %27de novo%27 purine nucleotide biosynthesis%3B red pigmen
chr01	0.824734	0.970865	171698	-	ID=NC_001133.7:KIN3:unknown_transcript_1;Parent=NC_001133.7:KIN3;locus_tag=YAR018C;gene_synonym=NPK1;gene_synonym=FUN52;EC_number=2.7.1.-;note=Nonessential protein kinase with unknown cellular role;experiment=experimental evidence%2C no additional details
chr01	0.970115	0.960629	175133	-	ID=NC_001133.7:CDC15:unknown_transcript_1;Parent=NC_001133.7:CDC15;locus_tag=YAR019C;gene_synonym=LYT1;EC_number=2.7.1.-;note=Protein kinase of the Mitotic Exit Network that is localized to the spindle pole bodies at late anaphase%3B promotes mitotic exit
chr01	0.88424	0.920554	177021	-	ID=NC_001133.7:PAU7:unknown_transcript_1;Parent=NC_001133.7:PAU7;locus_tag=YAR020C;note=Pau7p;experiment=experimental evidence%2C no additional details recorded;product=Part of 23-member seripauperin multigene family%2C active during alcoholic fermentatio
chr01	0.920739	0.918132	179818	-	locus_tag=YAR023C;note=Yar023cp;inference=non-experimental evidence%2C no additional details recorded;product=Putative integral membrane protein%2C member of DUP240 gene family;protein_id=NP_009413.1;db_xref=SGD:S000000074;db_xref=GI:6319330;db_xref=GeneI
chr01	0.938194	0.956216	183764	+	ID=NC_001133.7:UIP3:unknown_transcript_1;Parent=NC_001133.7:UIP3;locus_tag=YAR027W;note=Uip3p;experiment=experimental evidence%2C no additional details recorded;product=Putative integral membrane protein of unknown function%3B interacts with Ulp1p at the
chr01	0.811819	0.962328	184886	+	locus_tag=YAR028W;note=Yar028wp;inference=non-experimental evidence%2C no additional details recorded;product=Putative integral membrane protein%2C member of DUP240 gene family%3B GFP-fusion protein is induced in response to the DNA-damaging agent MMS;pro
chr01	0.887753	0.950877	186315	+	locus_tag=YAR029W;note=Yar029wp;inference=non-experimental evidence%2C no additional details recorded;product=Member of DUP240 gene family but contains no transmembrane domains%3B green fluorescent protein %28GFP%29-fusion protein localizes to the cytopla
chr01	0.671657	0.850167	186830	+	ID=NC_001133.7:PRM9:unknown_transcript_1;Parent=NC_001133.7:PRM9;locus_tag=YAR031W;note=Prm9p;experiment=experimental evidence%2C no additional details recorded;product=Pheromone-regulated protein with 3 predicted transmembrane segments and an FF sequence
chr01	0.968808	0.987221	188101	+	ID=NC_001133.7:MST28:unknown_transcript_1;Parent=NC_001133.7:MST28;locus_tag=YAR033W;note=Putative integral membrane protein%2C involved in vesicle formation%3B forms complex with Mst27p%3B member of DUP240 gene family%3B binds COPI and COPII vesicles;exp
chr01	0.476382	0.754719	190187	+	ID=NC_001133.7:YAT1:unknown_transcript_1;Parent=NC_001133.7:YAT1;locus_tag=YAR035W;EC_number=2.3.1.7;note=Yat1p;experiment=experimental evidence%2C no additional details recorded;product=Outer mitochondrial carnitine acetyltransferase%2C minor ethanol-ind
chr01	0.874558	0.958056	192411	-	locus_tag=YAR035C-A;note=Yar035c-ap;inference=non-experimental evidence%2C no additional details recorded;product=Putative protein of unknown function%3B identified by gene-trapping%2C microarray-based expression analysis%2C and genome-wide homology searc
chr01	0.946878	0.851185	192613	+	ID=NC_001133.7:SWH1:unknown_transcript_1;Parent=NC_001133.7:SWH1;locus_tag=YAR042W;gene_synonym=OSH1;gene_synonym=YAR044W;note=Swh1p;experiment=experimental evidence%2C no additional details recorded;product=Protein similar to mammalian oxysterol-binding
chr01	0.833943	0.833572	203394	+	ID=NC_001133.7:FLO1:unknown_transcript_1;Parent=NC_001133.7:FLO1;locus_tag=YAR050W;gene_synonym=FLO4;gene_synonym=FLO2;note=Lectin-like protein involved in flocculation%2C cell wall protein that binds to mannose chains on the surface of other cells%2C con
chr01	0.167049	0.875199	220189	+	locus_tag=YAR064W;note=Yar064wp;inference=non-experimental evidence%2C no additional details recorded;product=Putative protein of unknown function;protein_id=NP_009429.1;db_xref=SGD:S000000089;db_xref=GI:6319346;db_xref=GeneID:851294;exon_number=1
chr01	0.784832	0.847077	221040	+	locus_tag=YAR066W;note=Yar066wp;inference=non-experimental evidence%2C no additional details recorded;product=Putative GPI protein;protein_id=NP_009430.1;db_xref=SGD:S000002144;db_xref=GI:6319347;db_xref=GeneID:851295;exon_number=1
chr01	0.866048	0.765219	222397	+	locus_tag=YAR068W;note=Yar068wp;inference=non-experimental evidence%2C no additional details recorded;product=Fungal-specific protein of unknown function%3B induced in respiratory-deficient cells;protein_id=NP_009431.1;db_xref=SGD:S000000091;db_xref=GI:63
chr01	0.91127	0.933069	225451	+	ID=NC_001133.7:PHO11:unknown_transcript_1;Parent=NC_001133.7:PHO11;locus_tag=YAR071W;EC_number=3.1.3.2;note=Pho11p;experiment=experimental evidence%2C no additional details recorded;product=One of three repressible acid phosphatases%2C a glycoprotein that
chr02	NA	NA	2658	-	locus_tag=YBL113C;note=Ybl113cp;inference=non-experimental evidence%2C no additional details recorded;product=Helicase-like protein encoded within the telomeric Y%27 element;protein_id=NP_009437.1;db_xref=SGD:S000002153;db_xref=GI:6319355;db_xref=GeneID:8
chr02	NA	NA	2899	-	locus_tag=YBL112C;note=Ybl112cp;inference=non-experimental evidence%2C no additional details recorded;product=Putative protein of unknown function%3B YBL112C is contained within TEL02L;protein_id=NP_009438.1;db_xref=SGD:S000002152;db_xref=GI:6319356;db_xr
chr02	0.995802	0.994551	5009	-	locus_tag=YBL111C;note=Ybl111cp;inference=non-experimental evidence%2C no additional details recorded;product=Helicase-like protein encoded within the telomeric Y%27 element;protein_id=NP_009439.1;db_xref=SGD:S000002151;db_xref=GI:6319357;db_xref=GeneID:8
chr02	0.959497	0.969967	7733	-	ID=NC_001134.7:PAU9:unknown_transcript_1;Parent=NC_001134.7:PAU9;locus_tag=YBL108C-A;note=hypothetical protein identified by homology. See FEBS Letters %5B2000%5D 487:31-36.;experiment=experimental evidence%2C no additional details recorded;product=Pau9p;
chr02	0.843803	0.920112	10551	-	locus_tag=YBL107C;note=Ybl107cp;inference=non-experimental evidence%2C no additional details recorded;product=Putative protein of unknown function%3B green fluorescent protein %28GFP%29-fusion protein localizes to the cytoplasm%3B YBL107C is not an essent
chr02	0.543515	0.638817	13879	-	ID=NC_001134.7:SRO77:unknown_transcript_1;Parent=NC_001134.7:SRO77;locus_tag=YBL106C;gene_synonym=SNI2;gene_synonym=SOP2;note=Sro77p;experiment=experimental evidence%2C no additional details recorded;product=Protein with roles in exocytosis and cation hom
chr02	0.890774	0.911231	17696	-	ID=NC_001134.7:PKC1:unknown_transcript_1;Parent=NC_001134.7:PKC1;locus_tag=YBL105C;gene_synonym=STT1;gene_synonym=HPO2;gene_synonym=CLY15;EC_number=2.7.1.-;note=Protein serine%2Fthreonine kinase essential for cell wall remodeling during growth%3B localize
chr02	0.932277	0.927224	21293	-	locus_tag=YBL104C;gene_synonym=YBL103C-A;note=Ybl104cp;inference=non-experimental evidence%2C no additional details recorded;product=Putative protein of unknown function%2C promoter contains multiple GCN4 binding sites;protein_id=NP_009446.2;db_xref=SGD:S
chr02	0.789201	0.978717	23535	-	ID=NC_001134.7:RTG3:unknown_transcript_1;Parent=NC_001134.7:RTG3;locus_tag=YBL103C;note=Rtg3p;experiment=experimental evidence%2C no additional details recorded;product=Basic helix-loop-helix-leucine zipper %28bHLH%2FZip%29 transcription factor that forms
chr02	0.816929	0.954714	24098	+	ID=NC_001134.7:SFT2:unknown_transcript_1;Parent=NC_001134.7:SFT2;locus_tag=YBL102W;note=Sft2p;experiment=experimental evidence%2C no additional details recorded;product=Non-essential tetra-spanning membrane protein found mostly in the late Golgi%2C can su
chr02	0.958517	0.991324	28299	-	ID=NC_001134.7:ECM21:unknown_transcript_1;Parent=NC_001134.7:ECM21;locus_tag=YBL101C;note=Non-essential protein of unknown function%3B promoter contains several Gcn4p binding elements;experiment=experimental evidence%2C no additional details recorded;prod
chr02	0.675043	0.308285	28427	+	locus_tag=YBL100W-C;gene_synonym=YBL101W-C;note=Ybl100w-cp;inference=non-experimental evidence%2C no additional details recorded;product=Putative protein of unknown function%3B identified by gene-trapping%2C microarray-based expression analysis%2C and gen
chr02	0.903532	0.969413	29932	+	locus_tag=YBL100W-B;note=Ybl100w-bp;inference=non-experimental evidence%2C no additional details recorded;product=Retrotransposon TYA Gag and TYB Pol genes%3B transcribed%2Ftranslated as one unit%3B polyprotein is processed to make a nucleocapsid-like pro
chr02	0.903532	0.969413	29932	+	locus_tag=YBL100W-A;note=Ybl100w-ap;inference=non-experimental evidence%2C no additional details recorded;product=Retrotransposon TYA Gag gene co-transcribed with TYB Pol%3B translated as TYA or TYA-TYB polyprotein%3B Gag is a nucleocapsid protein that is
chr02	0.940419	0.925678	37050	+	ID=NC_001134.7:ATP1:unknown_transcript_1;Parent=NC_001134.7:ATP1;locus_tag=YBL099W;EC_number=3.6.3.14;note=Atp1p;experiment=experimental evidence%2C no additional details recorded;product=Alpha subunit of the F1 sector of mitochondrial F1F0 ATP synthase%2
chr02	0.897639	0.822999	39142	+	ID=NC_001134.7:BNA4:unknown_transcript_1;Parent=NC_001134.7:BNA4;locus_tag=YBL098W;note=Kynurenine 3-mono oxygenase%2C required for biosynthesis of nicotinic acid from tryptophan via kynurenine pathway;experiment=experimental evidence%2C no additional det
chr02	0.933309	0.949541	40828	+	ID=NC_001134.7:BRN1:unknown_transcript_1;Parent=NC_001134.7:BRN1;locus_tag=YBL097W;note=Essential protein required for chromosome condensation%2C likely to function as an intrinsic component of the condensation machinery%2C may influence multiple aspects
chr02	0.87159	0.970014	43274	+	locus_tag=YBL095W;note=Ybl095wp;inference=non-experimental evidence%2C no additional details recorded;product=Putative protein of unknown function%3B the authentic%2C non-tagged protein is detected in highly purified mitochondria in high-throughput studie
chr02	0.876999	0.855987	44915	-	ID=NC_001134.7:ROX3:unknown_transcript_1;Parent=NC_001134.7:ROX3;locus_tag=YBL093C;gene_synonym=MED19;gene_synonym=SSN7;gene_synonym=NUT3;note=Subunit of the RNA polymerase II mediator complex%3B associates with core polymerase subunits to form the RNA po
chr02	0.902803	0.875605	45975	+	ID=NC_001134.7:RPL32:unknown_transcript_1;Parent=NC_001134.7:RPL32;locus_tag=YBL092W;note=Rpl32p;experiment=experimental evidence%2C no additional details recorded;product=Protein component of the large %2860S%29 ribosomal subunit%2C has similarity to rat
chr02	0.740227	0.907094	47177	-	ID=NC_001134.7:SCS22:unknown_transcript_1;Parent=NC_001134.7:SCS22;locus_tag=YBL091C-A;note=Scs22p;experiment=experimental evidence%2C no additional details recorded;product=Protein involved in regulation of phospholipid metabolism%3B homolog of Scs2p%3B
chr02	0.884044	0.946809	48625	-	ID=NC_001134.7:MAP2:unknown_transcript_1;Parent=NC_001134.7:MAP2;locus_tag=YBL091C;EC_number=3.4.11.18;note=Methionine aminopeptidase%2C catalyzes the cotranslational removal of N-terminal methionine from nascent polypeptides%3B function is partially redu
chr02	0.774518	0.860332	48822	+	ID=NC_001134.7:MRP21:unknown_transcript_1;Parent=NC_001134.7:MRP21;locus_tag=YBL090W;gene_synonym=MRP50;note=Mrp21p;experiment=experimental evidence%2C no additional details recorded;product=Mitochondrial ribosomal protein of the large subunit%3B MRP21 ex
chr02	0.886428	0.949394	49571	+	ID=NC_001134.7:AVT5:unknown_transcript_1;Parent=NC_001134.7:AVT5;locus_tag=YBL089W;note=Putative transporter%2C member of a family of seven S. cerevisiae genes %28AVT1-7%29 related to vesicular GABA-glycine transporters;experiment=experimental evidence%2C
chr02	0.842573	0.706951	59379	-	ID=NC_001134.7:TEL1:unknown_transcript_1;Parent=NC_001134.7:TEL1;locus_tag=YBL088C;note=Tel1p;experiment=experimental evidence%2C no additional details recorded;product=Protein kinase primarily involved in telomere length regulation%3B contributes to cell
chr02	0.957192	0.957273	60735	-	ID=NC_001134.7:RPL23A:unknown_transcript_1;Parent=NC_001134.7:RPL23A;locus_tag=YBL087C;note=Rpl23ap;experiment=experimental evidence%2C no additional details recorded;product=Protein component of the large %2860S%29 ribosomal subunit%2C identical to Rpl23
chr02	0.899146	0.910254	62599	-	locus_tag=YBL086C;note=Ybl086cp;inference=non-experimental evidence%2C no additional details recorded;product=Protein of unknown function%3B green fluorescent protein %28GFP%29-fusion protein localizes to the cell periphery;protein_id=NP_009467.1;db_xref=
chr02	0.748488	0.904308	63873	+	ID=NC_001134.7:BOI1:unknown_transcript_1;Parent=NC_001134.7:BOI1;locus_tag=YBL085W;gene_synonym=BOB1;gene_synonym=GIN7;note=Protein implicated in polar growth%2C functionally redundant with Boi2p%3B interacts with bud-emergence protein Bem1p%3B contains a
chr02	0.748678	0.809551	69442	-	ID=NC_001134.7:CDC27:unknown_transcript_1;Parent=NC_001134.7:CDC27;locus_tag=YBL084C;gene_synonym=SNB1;gene_synonym=APC3;note=Subunit of the Anaphase-Promoting Complex%2FCyclosome %28APC%2FC%29%2C which is a ubiquitin-protein ligase required for degradati
chr02	0.789999	0.767539	71124	-	ID=NC_001134.7:ALG3:unknown_transcript_1;Parent=NC_001134.7:ALG3;locus_tag=YBL082C;gene_synonym=RHK1;EC_number=2.4.1.-;note=Dolichol-P-Man dependent alpha%281-3%29 mannosyltransferase%2C involved in the synthesis of dolichol-linked oligosaccharide donor f
chr02	0.648656	0.818658	71863	+	locus_tag=YBL081W;note=Ybl081wp;inference=non-experimental evidence%2C no additional details recorded;product=Non-essential protein of unknown function;protein_id=NP_009472.1;db_xref=SGD:S000000177;db_xref=GI:6319390;db_xref=GeneID:852197;exon_number=1
chr02	0.735296	0.961302	74692	-	ID=NC_001134.7:PET112:unknown_transcript_1;Parent=NC_001134.7:PET112;locus_tag=YBL080C;note=Protein required for mitochondrial translation%3B mutation is functionally complemented by a Bacillus subtilis ortholog;experiment=experimental evidence%2C no addi
chr02	0.925519	0.979418	75256	+	ID=NC_001134.7:NUP170:unknown_transcript_1;Parent=NC_001134.7:NUP170;locus_tag=YBL079W;gene_synonym=NLE3;note=Nup170p;experiment=experimental evidence%2C no additional details recorded;product=Abundant subunit of the nuclear pore complex %28NPC%29%2C requ
chr02	0.764572	0.90643	80728	-	ID=NC_001134.7:ATG8:unknown_transcript_1;Parent=NC_001134.7:ATG8;locus_tag=YBL078C;gene_synonym=AUT7;gene_synonym=CVT5;gene_synonym=APG8;note=Protein required for autophagy%3B modified by the serial action of Atg4p%2C Atg7p%2C and Atg3p%2C and conjugated
chr02	0.874883	0.84802	84259	-	ID=NC_001134.7:ILS1:unknown_transcript_1;Parent=NC_001134.7:ILS1;locus_tag=YBL076C;EC_number=6.1.1.5;note=Ils1p;experiment=experimental evidence%2C no additional details recorded;product=Cytoplasmic isoleucine-tRNA synthetase%2C target of the G1-specific
chr02	0.925884	0.969304	86446	-	ID=NC_001134.7:SSA3:unknown_transcript_1;Parent=NC_001134.7:SSA3;locus_tag=YBL075C;gene_synonym=YG106;note=Ssa3p;experiment=experimental evidence%2C no additional details recorded;product=ATPase involved in protein folding and the response to stress%3B pl
chr02	0.854077	0.805332	87787	-	ID=NC_001134.7:AAR2:unknown_transcript_1;Parent=NC_001134.7:AAR2;locus_tag=YBL074C;note=Component of the U5 snRNP%2C required for splicing of U3 precursors%3B originally described as a splicing factor specifically required for splicing pre-mRNA of the MAT
chr02	0.715315	0.886309	89123	-	ID=NC_001134.7:RPS8A:unknown_transcript_1;Parent=NC_001134.7:RPS8A;locus_tag=YBL072C;note=Rps8ap;experiment=experimental evidence%2C no additional details recorded;product=Protein component of the small %2840S%29 ribosomal subunit%3B identical to Rps8Bp a
chr02	0.509761	0.76439	89554	-	locus_tag=YBL071C-B;note=Ybl071c-bp;inference=non-experimental evidence%2C no additional details recorded;product=Putative protein of unknown function%3B identified by gene-trapping%2C microarray-based expression analysis%2C and genome-wide homology searc
chr02	0.743903	0.909459	89976	+	ID=NC_001134.7:KTI11:unknown_transcript_1;Parent=NC_001134.7:KTI11;locus_tag=YBL071W-A;gene_synonym=DPH3;note=Zn-ribbon electron carrier protein%2C required with Dph1p%2C Dph2p%2C Jjj3p%2C and Dph5p for synthesis of diphthamide%2C a modified histidine res
chr02	0.742035	0.913321	90739	+	ID=NC_001134.7:AST1:unknown_transcript_1;Parent=NC_001134.7:AST1;locus_tag=YBL069W;note=Peripheral membrane protein that interacts with the plasma membrane ATPase Pma1p and has a role in its targeting to the plasma membrane%2C possibly by influencing its
chr02	0.778362	0.905467	92412	+	ID=NC_001134.7:PRS4:unknown_transcript_1;Parent=NC_001134.7:PRS4;locus_tag=YBL068W;EC_number=2.7.6.1;note=Prs4p;experiment=experimental evidence%2C no additional details recorded;product=5-phospho-ribosyl-1%28alpha%29-pyrophosphate synthetase%2C involved
chr02	0.769324	0.9201	95884	-	ID=NC_001134.7:UBP13:unknown_transcript_1;Parent=NC_001134.7:UBP13;locus_tag=YBL067C;EC_number=3.1.2.15;note=Ubp13p;experiment=experimental evidence%2C no additional details recorded;product=Putative ubiquitin carboxyl-terminal hydrolase%2C ubiquitin-spec
chr02	0.885441	0.867145	100117	-	ID=NC_001134.7:SEF1:unknown_transcript_1;Parent=NC_001134.7:SEF1;locus_tag=YBL066C;note=Sef1p;experiment=experimental evidence%2C no additional details recorded;product=Putative transcription factor%2C has homolog in Kluyveromyces lactis;protein_id=NP_009
chr02	0.677356	0.77124	101158	-	ID=NC_001134.7:PRX1:unknown_transcript_1;Parent=NC_001134.7:PRX1;locus_tag=YBL064C;note=Prx1p;experiment=experimental evidence%2C no additional details recorded;product=Mitochondrial peroxiredoxin %281-Cys Prx%29 with thioredoxin peroxidase activity%2C ha
chr02	0.526684	0.825615	101888	+	ID=NC_001134.7:KIP1:unknown_transcript_1;Parent=NC_001134.7:KIP1;locus_tag=YBL063W;gene_synonym=CIN9;note=Kip1p;experiment=experimental evidence%2C no additional details recorded;product=Kinesin-related motor protein required for mitotic spindle assembly
chr02	0.98496	0.992729	107408	-	ID=NC_001134.7:SKT5:unknown_transcript_1;Parent=NC_001134.7:SKT5;locus_tag=YBL061C;gene_synonym=CSD4;gene_synonym=CHS4;gene_synonym=CAL2;note=Skt5p;experiment=experimental evidence%2C no additional details recorded;product=Activator of Chs3p %28chitin syn
chr02	0.96033	0.993573	107934	+	ID=NC_001134.7:YEL1:unknown_transcript_1;Parent=NC_001134.7:YEL1;locus_tag=YBL060W;note=Yel1p;experiment=experimental evidence%2C no additional details recorded;product=Guanine nucleotide exchange factor specific for Arf3p%3B localized to the bud neck and
chr02	0.924125	0.933239	110541	-	locus_tag=YBL059C-A;note=Ybl059c-ap;inference=non-experimental evidence%2C no additional details recorded;product=Putative protein of unknown function%3B contains twin Cx9C motifs that can form coiled coil-helix-coiled-coil helix fold%3B green fluorescent
chr02	0.534755	0.865202	110596	+	locus_tag=YBL059W;note=Ybl059wp;inference=non-experimental evidence%2C no additional details recorded;product=Putative protein of unknown function%3B the authentic%2C non-tagged protein is detected in highly purified mitochondria in high-throughput studie
chr02	0.786274	0.932922	111439	+	ID=NC_001134.7:SHP1:unknown_transcript_1;Parent=NC_001134.7:SHP1;locus_tag=YBL058W;gene_synonym=UBX1;note=UBX %28ubiquitin regulatory X%29 domain-containing protein that regulates Glc7p phosphatase activity and interacts with Cdc48p%3B interacts with ubiq
chr02	0.897633	0.911558	113447	-	ID=NC_001134.7:PTH2:unknown_transcript_1;Parent=NC_001134.7:PTH2;locus_tag=YBL057C;note=Pth2p;experiment=experimental evidence%2C no additional details recorded;product=One of two %28see also PTH1%29 mitochondrially-localized peptidyl-tRNA hydrolases%3B n
chr02	0.844024	0.917491	113765	+	ID=NC_001134.7:PTC3:unknown_transcript_1;Parent=NC_001134.7:PTC3;locus_tag=YBL056W;EC_number=3.1.3.16;note=Type 2C protein phosphatase%3B dephosphorylates Hog1p %28see also Ptc2p%29 to limit maximal kinase activity induced by osmotic stress%3B dephosphory
chr02	0.764646	0.963615	116832	-	locus_tag=YBL055C;note=Ybl055cp;inference=non-experimental evidence%2C no additional details recorded;product=3%27--%3E5%27 exonuclease and endonuclease with a possible role in apoptosis%3B has similarity to mammalian and C. elegans apoptotic nucleases;pr
chr02	0.871991	0.905693	117592	+	locus_tag=YBL054W;note=Ybl054wp;inference=non-experimental evidence%2C no additional details recorded;product=Protein of unknown function involved in rRNA and ribosome biosynthesis;protein_id=NP_009499.1;db_xref=SGD:S000000150;db_xref=GI:6319417;db_xref=G
chr02	0.828511	0.872569	121877	-	ID=NC_001134.7:SAS3:unknown_transcript_1;Parent=NC_001134.7:SAS3;locus_tag=YBL052C;note=Sas3p;experiment=experimental evidence%2C no additional details recorded;product=Histone acetyltransferase catalytic subunit of NuA3 complex that acetylates histone H3
chr02	0.976537	0.989166	124762	-	ID=NC_001134.7:PIN4:unknown_transcript_1;Parent=NC_001134.7:PIN4;locus_tag=YBL051C;gene_synonym=MDT1;note=Protein involved in G2%2FM phase progression and response to DNA damage%2C interacts with Rad53p%3B contains an RNA recognition motif%2C a nuclear lo
chr02	0.852502	0.971343	125128	+	ID=NC_001134.7:SEC17:unknown_transcript_1;Parent=NC_001134.7:SEC17;locus_tag=YBL050W;gene_synonym=RNS3;note=Sec17p;experiment=experimental evidence%2C no additional details recorded;product=Peripheral membrane protein required for vesicular transport betw
chr02	0.671998	0.56841	126831	+	ID=NC_001134.7:MOH1:unknown_transcript_1;Parent=NC_001134.7:MOH1;locus_tag=YBL049W;note=Protein of unknown function%2C has homology to kinase Snf7p%3B not required for growth on nonfermentable carbon sources%3B essential for viability in stationary phase;
chr02	0.545349	0.904058	132043	-	ID=NC_001134.7:EDE1:unknown_transcript_1;Parent=NC_001134.7:EDE1;locus_tag=YBL047C;gene_synonym=BUD15;note=Key endocytic protein involved in a network of interactions with other endocytic proteins%2C binds membranes in a ubiquitin-dependent manner%2C may
chr02	0.577919	0.846165	132427	+	ID=NC_001134.7:PSY4:unknown_transcript_1;Parent=NC_001134.7:PSY4;locus_tag=YBL046W;note=Putative regulatory subunit of an evolutionarily conserved protein phosphatase complex containing the catalytic subunit Pph3p and a third subunit Psy2p%3B required for
chr02	0.642463	0.844897	135519	-	ID=NC_001134.7:COR1:unknown_transcript_1;Parent=NC_001134.7:COR1;locus_tag=YBL045C;gene_synonym=QCR1;EC_number=1.10.2.2;note=Core subunit of the ubiquinol-cytochrome c reductase complex %28bc1 complex%29%2C which is a component of the mitochondrial inner
chr02	0.80513	0.88587	136001	+	locus_tag=YBL044W;note=Ybl044wp;inference=non-experimental evidence%2C no additional details recorded;product=Putative protein of unknown function%3B YBL044W is not an essential protein;protein_id=NP_009509.1;db_xref=SGD:S000000140;db_xref=GI:6319427;db_x
chr02	0.751324	0.889007	136691	+	ID=NC_001134.7:ECM13:unknown_transcript_1;Parent=NC_001134.7:ECM13;locus_tag=YBL043W;note=Non-essential protein of unknown function;experiment=experimental evidence%2C no additional details recorded;product=Ecm13p;protein_id=NP_009510.1;db_xref=SGD:S00000
chr02	0.70518	0.748429	140263	-	ID=NC_001134.7:FUI1:unknown_transcript_1;Parent=NC_001134.7:FUI1;locus_tag=YBL042C;note=High affinity uridine permease%2C localized to the plasma membrane%3B not involved in uracil transport;experiment=experimental evidence%2C no additional details record
chr02	0.697114	0.75696	141250	+	ID=NC_001134.7:PRE7:unknown_transcript_1;Parent=NC_001134.7:PRE7;locus_tag=YBL041W;gene_synonym=PRS3;EC_number=3.4.25.1;note=Pre7p;experiment=experimental evidence%2C no additional details recorded;product=20S proteasome beta-type subunit;protein_id=NP_00
chr02	0.49785	0.95775	142871	-	ID=NC_001134.7:ERD2:unknown_transcript_1;Parent=NC_001134.7:ERD2;locus_tag=YBL040C;note=HDEL receptor%2C an integral membrane protein that binds to the HDEL motif in proteins destined for retention in the endoplasmic reticulum%3B has a role in maintenance
chr02	0.630269	0.922335	143396	+	locus_tag=YBL039W-B;gene_synonym=YBL039W-A;note=Ybl039w-bp;inference=non-experimental evidence%2C no additional details recorded;product=Putative protein of unknown function;protein_id=NP_878045.1;db_xref=SGD:S000028517;db_xref=GI:33438763;db_xref=GeneID:
chr02	0.781607	0.970169	145731	-	ID=NC_001134.7:URA7:unknown_transcript_1;Parent=NC_001134.7:URA7;locus_tag=YBL039C;EC_number=6.3.4.2;note=Ura7p;experiment=experimental evidence%2C no additional details recorded;product=Major CTP synthase isozyme %28see also URA8%29%2C catalyzes the ATP-
chr02	0.704429	0.720459	146190	+	ID=NC_001134.7:MRPL16:unknown_transcript_1;Parent=NC_001134.7:MRPL16;locus_tag=YBL038W;note=Mrpl16p;experiment=experimental evidence%2C no additional details recorded;product=Mitochondrial ribosomal protein of the large subunit;protein_id=NP_009515.1;db_x
chr02	0.805495	0.96431	147212	+	ID=NC_001134.7:APL3:unknown_transcript_1;Parent=NC_001134.7:APL3;locus_tag=YBL037W;note=Apl3p;experiment=experimental evidence%2C no additional details recorded;product=Alpha-adaptin%2C large subunit of the clathrin associated protein complex %28AP-2%29%3
chr02	0.860453	0.889634	151223	-	locus_tag=YBL036C;note=Ybl036cp;inference=non-experimental evidence%2C no additional details recorded;product=Single-domain racemase%2C possibly non-specific due to the lack of the second domain%2C which presumably determines specificity%3B GFP-fusion pro
chr02	0.941307	0.981454	153613	-	ID=NC_001134.7:POL12:unknown_transcript_1;Parent=NC_001134.7:POL12;locus_tag=YBL035C;note=Pol12p;experiment=experimental evidence%2C no additional details recorded;product=B subunit of DNA polymerase alpha-primase complex%2C required for initiation of DNA
chr02	0.750786	0.904971	158392	-	ID=NC_001134.7:STU1:unknown_transcript_1;Parent=NC_001134.7:STU1;locus_tag=YBL034C;note=Stu1p;experiment=experimental evidence%2C no additional details recorded;product=Component of the mitotic spindle that binds to interpolar microtubules via its associa
chr02	0.857662	0.897995	159696	-	ID=NC_001134.7:RIB1:unknown_transcript_1;Parent=NC_001134.7:RIB1;locus_tag=YBL033C;EC_number=3.5.4.25;note=Rib1p;experiment=experimental evidence%2C no additional details recorded;product=GTP cyclohydrolase II%3B catalyzes the first step of the riboflavin
chr02	0.956875	0.980367	160187	+	ID=NC_001134.7:HEK2:unknown_transcript_1;Parent=NC_001134.7:HEK2;locus_tag=YBL032W;gene_synonym=KHD1;note=RNA binding protein with similarity to hnRNP-K that localizes to the cytoplasm and to subtelomeric DNA%3B required for the proper localization of ASH
chr02	0.614323	0.878469	161702	+	ID=NC_001134.7:SHE1:unknown_transcript_1;Parent=NC_001134.7:SHE1;locus_tag=YBL031W;note=She1p;experiment=experimental evidence%2C no additional details recorded;product=Cytoskeletal protein of unknown function%3B overexpression causes growth arrest;protei
chr02	0.564121	0.733644	164000	-	ID=NC_001134.7:PET9:unknown_transcript_1;Parent=NC_001134.7:PET9;locus_tag=YBL030C;gene_synonym=ANC2;gene_synonym=AAC2;note=Pet9p;experiment=experimental evidence%2C no additional details recorded;product=Major ADP%2FATP carrier of the mitochondrial inner
chr02	0.844169	0.95881	164775	-	locus_tag=YBL029C-A;note=Ybl029c-ap;inference=non-experimental evidence%2C no additional details recorded;product=Protein of unknown function%3B green fluorescent protein %28GFP%29-fusion protein localizes to the cell periphery%3B has potential orthologs
chr02	0.715666	0.88492	166137	+	locus_tag=YBL029W;note=Ybl029wp;inference=non-experimental evidence%2C no additional details recorded;product=Non-essential protein of unknown function;protein_id=NP_009524.1;db_xref=SGD:S000000125;db_xref=GI:6319442;db_xref=GeneID:852252;exon_number=1
chr02	0.795224	0.911918	167841	-	locus_tag=YBL028C;note=Ybl028cp;inference=non-experimental evidence%2C no additional details recorded;product=Protein of unknown function that may interact with ribosomes%3B green fluorescent protein %28GFP%29-fusion protein localizes to the nucleolus%3B
chr02	0.954449	0.893434	168426	+	ID=NC_001134.7:RPL19B:unknown_transcript_1;Parent=NC_001134.7:RPL19B;locus_tag=YBL027W;note=Rpl19bp;experiment=experimental evidence%2C no additional details recorded;product=Protein component of the large %2860S%29 ribosomal subunit%2C nearly identical t
chr02	0.792455	0.912147	168812	+	ID=NC_001134.7:RPL19B:unknown_transcript_1;Parent=NC_001134.7:RPL19B;locus_tag=YBL027W;note=Rpl19bp;experiment=experimental evidence%2C no additional details recorded;product=Protein component of the large %2860S%29 ribosomal subunit%2C nearly identical t
chr02	0.879625	0.950658	170626	+	ID=NC_001134.7:LSM2:unknown_transcript_1;Parent=NC_001134.7:LSM2;locus_tag=YBL026W;gene_synonym=SNP3;gene_synonym=SMX5;note=Lsm2p;experiment=experimental evidence%2C no additional details recorded;product=Lsm %28Like Sm%29 protein%3B part of heteroheptame
chr02	0.691346	0.923991	171484	+	ID=NC_001134.7:RRN10:unknown_transcript_1;Parent=NC_001134.7:RRN10;locus_tag=YBL025W;note=Rrn10p;experiment=experimental evidence%2C no additional details recorded;product=Protein involved in promoting high level transcription of rDNA%2C subunit of UAF %2
chr02	0.62932	0.902644	172537	+	ID=NC_001134.7:NCL1:unknown_transcript_1;Parent=NC_001134.7:NCL1;locus_tag=YBL024W;gene_synonym=TRM4;note=S-adenosyl-L-methionine-dependent tRNA: m5C-methyltransferase%2C methylates cytosine to m5C at several positions in tRNAs and intron-containing pre-t
chr02	0.813009	0.504625	177529	-	ID=NC_001134.7:MCM2:unknown_transcript_1;Parent=NC_001134.7:MCM2;locus_tag=YBL023C;note=Protein involved in DNA replication%3B component of the Mcm2-7 hexameric complex that binds chromatin as a part of the pre-replicative complex;experiment=experimental
chr02	0.586428	0.692253	181278	-	ID=NC_001134.7:PIM1:unknown_transcript_1;Parent=NC_001134.7:PIM1;locus_tag=YBL022C;gene_synonym=LON1;EC_number=3.4.21.-;note=Pim1p;experiment=experimental evidence%2C no additional details recorded;product=ATP-dependent Lon protease%2C involved in degrada
chr02	0.935559	0.855321	182097	-	ID=NC_001134.7:HAP3:unknown_transcript_1;Parent=NC_001134.7:HAP3;locus_tag=YBL021C;note=Subunit of the heme-activated%2C glucose-repressed Hap2p%2F3p%2F4p%2F5p CCAAT-binding complex%2C a transcriptional activator and global regulator of respiratory gene e
chr02	0.909335	0.902958	182404	+	ID=NC_001134.7:RFT1:unknown_transcript_1;Parent=NC_001134.7:RFT1;locus_tag=YBL020W;note=Rft1p;experiment=experimental evidence%2C no additional details recorded;product=Flippase%2C essential integral membrane protein that is required for translocation of
chr02	0.718023	0.885211	184356	+	ID=NC_001134.7:APN2:unknown_transcript_1;Parent=NC_001134.7:APN2;locus_tag=YBL019W;gene_synonym=ETH1;note=Class II abasic %28AP%29 endonuclease involved in repair of DNA damage%3B homolog of human HAP1 and E. coli exoIII;experiment=experimental evidence%2
chr02	0.673992	0.803978	186477	-	ID=NC_001134.7:POP8:unknown_transcript_1;Parent=NC_001134.7:POP8;locus_tag=YBL018C;note=Subunit of both RNase MRP%2C which cleaves pre-rRNA%2C and nuclear RNase P%2C which cleaves tRNA precursors to generate mature 5%27 ends;experiment=experimental eviden
chr02	0.914373	0.945927	191586	-	ID=NC_001134.7:PEP1:unknown_transcript_1;Parent=NC_001134.7:PEP1;locus_tag=YBL017C;gene_synonym=VPT1;gene_synonym=VPS10;note=Type I transmembrane sorting receptor for multiple vacuolar hydrolases%3B cycles between the late-Golgi and prevacuolar endosome-l
chr02	0.905435	0.941582	192454	+	ID=NC_001134.7:FUS3:unknown_transcript_1;Parent=NC_001134.7:FUS3;locus_tag=YBL016W;gene_synonym=DAC2;EC_number=2.7.1.-;note=Mitogen-activated serine%2Fthreonine protein kinase involved in mating%3B phosphoactivated by Ste7p%3B substrates include Ste12p%2C
chr02	0.955472	0.911551	194125	+	ID=NC_001134.7:ACH1:unknown_transcript_1;Parent=NC_001134.7:ACH1;locus_tag=YBL015W;EC_number=3.1.2.1;note=Ach1p;experiment=experimental evidence%2C no additional details recorded;product=Acetyl-coA hydrolase%2C primarily localized to mitochondria%3B phosp
chr02	0.870949	0.818358	201751	-	ID=NC_001134.7:RRN6:unknown_transcript_1;Parent=NC_001134.7:RRN6;locus_tag=YBL014C;note=Rrn6p;experiment=experimental evidence%2C no additional details recorded;product=Protein involved in the transcription of 35S rRNA genes by RNA polymerase I%3B compone
chr02	0.931972	0.955933	202059	+	ID=NC_001134.7:FMT1:unknown_transcript_1;Parent=NC_001134.7:FMT1;locus_tag=YBL013W;EC_number=2.1.2.9;note=Methionyl-tRNA formyltransferase%2C catalyzes the formylation of initiator Met-tRNA in mitochondria%3B potential Cdc28p substrate;experiment=experime
chr02	0.730856	0.767547	203541	+	ID=NC_001134.7:SCT1:unknown_transcript_1;Parent=NC_001134.7:SCT1;locus_tag=YBL011W;gene_synonym=GAT2;note=Sct1p;experiment=experimental evidence%2C no additional details recorded;product=Glycerol 3-phosphate%2Fdihydroxyacetone phosphate dual substrate-spe
chr02	0.837625	0.975857	206952	-	locus_tag=YBL010C;note=Ybl010cp;inference=non-experimental evidence%2C no additional details recorded;product=Putative protein of unknown function%3B green fluorescent protein %28GFP%29-fusion protein colocalizes with clathrin-coated vesicles;protein_id=N
chr02	0.944061	0.840476	207197	+	ID=NC_001134.7:ALK2:unknown_transcript_1;Parent=NC_001134.7:ALK2;locus_tag=YBL009W;note=Protein kinase%3B accumulation and phosphorylation are periodic during the cell cycle%3B phosphorylated in response to DNA damage%3B contains characteristic motifs for
chr02	0.839499	0.910312	209412	+	locus_tag=YBL008W-A;note=Ybl008w-ap;inference=non-experimental evidence%2C no additional details recorded;product=Putative protein of unknown function%3B identified by fungal homology and RT-PCR;protein_id=NP_878046.1;db_xref=SGD:S000028529;db_xref=GI:334
chr02	0.862665	0.816994	209656	+	ID=NC_001134.7:HIR1:unknown_transcript_1;Parent=NC_001134.7:HIR1;locus_tag=YBL008W;note=Non-essential transcriptional corepressor involved in the cell cycle-regulated transcription of histone H2A%2C H2B%2C H3 and H4 genes%3B contributes to nucleosome form
chr02	0.83781	0.668637	216369	-	ID=NC_001134.7:SLA1:unknown_transcript_1;Parent=NC_001134.7:SLA1;locus_tag=YBL007C;note=Sla1p;experiment=experimental evidence%2C no additional details recorded;product=Cytoskeletal protein binding protein required for assembly of the cortical actin cytos
chr02	0.784006	0.856739	217132	-	ID=NC_001134.7:LDB7:unknown_transcript_1;Parent=NC_001134.7:LDB7;locus_tag=YBL006C;gene_synonym=RSC14;note=Ldb7p;experiment=experimental evidence%2C no additional details recorded;product=Component of the RSC chromatin remodeling complex%3B interacts with
chr02	0.723236	0.530441	217473	+	ID=NC_001134.7:PDR3:unknown_transcript_1;Parent=NC_001134.7:PDR3;locus_tag=YBL005W;gene_synonym=TPE2;gene_synonym=AMY2;note=Transcriptional activator of the pleiotropic drug resistance network%2C regulates expression of ATP-binding cassette %28ABC%29 tran
chr02	0.950781	0.952679	221333	+	locus_tag=YBL005W-B;note=Ybl005w-bp;inference=non-experimental evidence%2C no additional details recorded;product=Retrotransposon TYA Gag and TYB Pol genes%3B transcribed%2Ftranslated as one unit%3B polyprotein is processed to make a nucleocapsid-like pro
chr02	0.950781	0.952679	221333	+	locus_tag=YBL005W-A;note=Ybl005w-ap;inference=non-experimental evidence%2C no additional details recorded;product=Retrotransposon TYA Gag gene co-transcribed with TYB Pol%3B translated as TYA or TYA-TYB polyprotein%3B Gag is a nucleocapsid protein that is
chr02	0.890484	0.977157	227639	+	ID=NC_001134.7:UTP20:unknown_transcript_1;Parent=NC_001134.7:UTP20;locus_tag=YBL004W;note=Utp20p;experiment=experimental evidence%2C no additional details recorded;product=Component of the small-subunit %28SSU%29 processome%2C which is involved in the bio
chr02	0.249607	0.473673	235795	-	ID=NC_001134.7:HTA2:unknown_transcript_1;Parent=NC_001134.7:HTA2;locus_tag=YBL003C;gene_synonym=H2A2;note=One of two nearly identical %28see also HTA1%29 histone H2A subtypes%3B core histone required for chromatin assembly and chromosome function%3B DNA d
chr02	0.348376	0.456575	236495	+	ID=NC_001134.7:HTB2:unknown_transcript_1;Parent=NC_001134.7:HTB2;locus_tag=YBL002W;note=One of two nearly identical %28see HTB1%29 histone H2B subtypes required for chromatin assembly and chromosome function%3B Rad6p-Bre1p-Lge1p mediated ubiquitination re
chr02	0.958026	0.886845	237469	-	ID=NC_001134.7:ECM15:unknown_transcript_1;Parent=NC_001134.7:ECM15;locus_tag=YBL001C;note=Non-essential protein of unknown function%2C likely exists as tetramer%2C may be regulated by the binding of small-molecule ligands %28possibly sulfate ions%29%2C ma
chr02	0.299439	0.732559	241285	-	ID=NC_001134.7:NTH2:unknown_transcript_1;Parent=NC_001134.7:NTH2;locus_tag=YBR001C;EC_number=3.2.1.28;note=Putative neutral trehalase%2C required for thermotolerance and may mediate resistance to other cellular stresses;experiment=experimental evidence%2C
chr02	0.975219	0.886676	242570	-	ID=NC_001134.7:RER2:unknown_transcript_1;Parent=NC_001134.7:RER2;locus_tag=YBR002C;note=Rer2p;experiment=experimental evidence%2C no additional details recorded;product=Cis-prenyltransferase involved in dolichol synthesis%3B participates in endoplasmic re
chr02	0.787255	0.863287	242811	+	ID=NC_001134.7:COQ1:unknown_transcript_1;Parent=NC_001134.7:COQ1;locus_tag=YBR003W;EC_number=2.5.1.-;note=Hexaprenyl pyrophosphate synthetase%2C catalyzes the first step in ubiquinone %28coenzyme Q%29 biosynthesis;experiment=experimental evidence%2C no ad
chr02	0.695531	0.902678	245669	-	ID=NC_001134.7:GPI18:unknown_transcript_1;Parent=NC_001134.7:GPI18;locus_tag=YBR004C;note=Gpi18p;experiment=experimental evidence%2C no additional details recorded;product=Functional ortholog of human PIG-V%2C which is a mannosyltransferase that transfers
chr02	0.815493	0.895874	245908	+	ID=NC_001134.7:RCR1:unknown_transcript_1;Parent=NC_001134.7:RCR1;locus_tag=YBR005W;note=Rcr1p;experiment=experimental evidence%2C no additional details recorded;product=Protein of the ER membrane involved in cell wall chitin deposition%3B may function in
chr02	0.798347	0.820915	247012	+	ID=NC_001134.7:UGA2:unknown_transcript_1;Parent=NC_001134.7:UGA2;locus_tag=YBR006W;gene_synonym=UGA5;note=Uga2p;experiment=experimental evidence%2C no additional details recorded;product=Succinate semialdehyde dehydrogenase involved in the utilization of
chr02	0.918892	0.902205	251017	-	ID=NC_001134.7:DSF2:unknown_transcript_1;Parent=NC_001134.7:DSF2;locus_tag=YBR007C;note=Dsf2p;experiment=experimental evidence%2C no additional details recorded;product=Deletion suppressor of mpt5 mutation;protein_id=NP_009561.1;db_xref=SGD:S000000211;db_
chr02	0.95847	0.878166	254210	-	ID=NC_001134.7:FLR1:unknown_transcript_1;Parent=NC_001134.7:FLR1;locus_tag=YBR008C;note=Plasma membrane multidrug transporter of the major facilitator superfamily%2C involved in efflux of fluconazole%2C diazaborine%2C benomyl%2C methotrexate%2C and other
chr02	0.789105	0.804026	255682	-	ID=NC_001134.7:HHF1:unknown_transcript_1;Parent=NC_001134.7:HHF1;locus_tag=YBR009C;note=One of two identical histone H4 proteins %28see also HHF2%29%3B core histone required for chromatin assembly and chromosome function%3B contributes to telomeric silenc
chr02	0.752354	0.807459	256329	+	ID=NC_001134.7:HHT1:unknown_transcript_1;Parent=NC_001134.7:HHT1;locus_tag=YBR010W;gene_synonym=SIN2;gene_synonym=BUR5;note=One of two identical histone H3 proteins %28see also HHT2%29%3B core histone required for chromatin assembly%2C involved in heteroc
chr02	0.77561	0.922376	257973	-	ID=NC_001134.7:IPP1:unknown_transcript_1;Parent=NC_001134.7:IPP1;locus_tag=YBR011C;gene_synonym=PPA1;EC_number=3.6.1.1;note=Ipp1p;experiment=experimental evidence%2C no additional details recorded;product=Cytoplasmic inorganic pyrophosphatase %28PPase%29%
chr02	0.943001	0.934023	259867	+	locus_tag=YBR012W-B;note=Ybr012w-bp;inference=non-experimental evidence%2C no additional details recorded;product=Retrotransposon TYA Gag and TYB Pol genes%3B transcribed%2Ftranslated as one unit%3B polyprotein is processed to make a nucleocapsid-like pro
chr02	0.943001	0.934023	259867	+	locus_tag=YBR012W-A;note=Ybr012w-ap;inference=non-experimental evidence%2C no additional details recorded;product=Retrotransposon TYA Gag gene co-transcribed with TYB Pol%3B translated as TYA or TYA-TYB polyprotein%3B Gag is a nucleocapsid protein that is
chr02	0.786173	0.874793	265879	-	locus_tag=YBR013C;note=Ybr013cp;inference=non-experimental evidence%2C no additional details recorded;product=Putative protein of unknown function%2C haploid deletion mutant exhibits synthetic phenotype with alpha-synuclein;protein_id=NP_009569.1;db_xref=
chr02	0.915261	0.944585	267336	-	ID=NC_001134.7:GRX7:unknown_transcript_1;Parent=NC_001134.7:GRX7;locus_tag=YBR014C;note=Monothiol glutaredoxin%3B more similar in activity to dithiol than other monothiol glutaredoxins%3B membrane localized%3B forms homodimers%3B does not bind metal ions;
chr02	0.945254	0.925701	269503	-	ID=NC_001134.7:MNN2:unknown_transcript_1;Parent=NC_001134.7:MNN2;locus_tag=YBR015C;gene_synonym=LDB8;gene_synonym=CRV4;gene_synonym=TTP1;note=Mnn2p;experiment=experimental evidence%2C no additional details recorded;product=Alpha-1%2C2-mannosyltransferase%
chr02	0.971595	0.93686	270247	+	locus_tag=YBR016W;note=Ybr016wp;inference=non-experimental evidence%2C no additional details recorded;product=Plasma membrane protein of unknown function%3B has similarity to hydrophilins%2C which are hydrophilic%2C glycine-rich proteins involved in the a
chr02	0.747231	0.92395	273703	-	ID=NC_001134.7:KAP104:unknown_transcript_1;Parent=NC_001134.7:KAP104;locus_tag=YBR017C;note=Transportin%2C cytosolic karyopherin beta 2 involved in delivery of heterogeneous nuclear ribonucleoproteins to the nucleoplasm%2C binds rg-nuclear localization si
chr02	0.167688	0.498226	275527	-	ID=NC_001134.7:GAL7:unknown_transcript_1;Parent=NC_001134.7:GAL7;locus_tag=YBR018C;EC_number=2.7.7.10;note=Galactose-1-phosphate uridyl transferase%2C synthesizes glucose-1-phosphate and UDP-galactose from UDP-D-glucose and alpha-D-galactose-1-phosphate i
chr02	0.628089	0.925518	278352	-	ID=NC_001134.7:GAL10:unknown_transcript_1;Parent=NC_001134.7:GAL10;locus_tag=YBR019C;EC_number=5.1.3.3;note=UDP-glucose-4-epimerase%2C catalyzes the interconversion of UDP-galactose and UDP-D-glucose in galactose metabolism%3B also catalyzes the conversio
chr02	0.71775	0.89766	279021	+	ID=NC_001134.7:GAL1:unknown_transcript_1;Parent=NC_001134.7:GAL1;locus_tag=YBR020W;EC_number=2.7.1.6;note=Galactokinase%2C phosphorylates alpha-D-galactose to alpha-D-galactose-1-phosphate in the first step of galactose catabolism%3B expression regulated
chr02	0.86537	0.739448	281443	+	ID=NC_001134.7:FUR4:unknown_transcript_1;Parent=NC_001134.7:FUR4;locus_tag=YBR021W;note=Uracil permease%2C localized to the plasma membrane%3B expression is tightly regulated by uracil levels and environmental cues;experiment=experimental evidence%2C no a
chr02	0.786986	0.892993	283738	+	ID=NC_001134.7:POA1:unknown_transcript_1;Parent=NC_001134.7:POA1;locus_tag=YBR022W;note=Poa1p;experiment=experimental evidence%2C no additional details recorded;product=Phosphatase that is highly specific for ADP-ribose 1%27%27-phosphate%2C a tRNA splicin
chr02	0.960238	0.992906	287925	-	ID=NC_001134.7:CHS3:unknown_transcript_1;Parent=NC_001134.7:CHS3;locus_tag=YBR023C;gene_synonym=KTI2;gene_synonym=DIT101;gene_synonym=CSD2;gene_synonym=CAL1;EC_number=2.4.1.16;note=Chs3p;experiment=experimental evidence%2C no additional details recorded;p
chr02	0.938358	0.87581	289445	+	ID=NC_001134.7:SCO2:unknown_transcript_1;Parent=NC_001134.7:SCO2;locus_tag=YBR024W;note=Sco2p;experiment=experimental evidence%2C no additional details recorded;product=Protein anchored to the mitochondrial inner membrane%2C similar to Sco1p and may have
chr02	0.715844	0.942958	291865	-	ID=NC_001134.7:OLA1:unknown_transcript_1;Parent=NC_001134.7:OLA1;locus_tag=YBR025C;note=P-loop ATPase with similarity to human OLA1 and bacterial YchF%3B identified as specifically interacting with the proteasome%3B protein levels are induced by hydrogen
chr02	0.404451	0.874945	294019	-	ID=NC_001134.7:ETR1:unknown_transcript_1;Parent=NC_001134.7:ETR1;locus_tag=YBR026C;gene_synonym=MRF1%27;gene_synonym=MRF1;note=Etr1p;experiment=experimental evidence%2C no additional details recorded;product=2-enoyl thioester reductase%2C member of the me
chr02	0.602209	0.561519	296002	-	locus_tag=YBR028C;EC_number=2.7.1.-;note=Ybr028cp;inference=non-experimental evidence%2C no additional details recorded;product=Putative protein kinase%2C possible substrate of cAMP-dependent protein kinase %28PKA%29;protein_id=NP_009584.1;db_xref=SGD:S00
chr02	0.959231	0.987222	297742	-	ID=NC_001134.7:CDS1:unknown_transcript_1;Parent=NC_001134.7:CDS1;locus_tag=YBR029C;gene_synonym=CDG1;EC_number=2.7.7.41;note=Phosphatidate cytidylyltransferase %28CDP-diglyceride synthetase%29%3B an enzyme that catalyzes that conversion of CTP %2B phospha
chr02	0.945543	0.968071	298292	+	locus_tag=YBR030W;note=Ybr030wp;inference=non-experimental evidence%2C no additional details recorded;product=Putative protein of unknown function%3B predicted protein contains a SET domain %28S-adenosyl-L-methionine-binding fold%29;protein_id=NP_009586.1
chr02	0.922182	0.989892	300166	+	ID=NC_001134.7:RPL4A:unknown_transcript_1;Parent=NC_001134.7:RPL4A;locus_tag=YBR031W;note=Rpl4ap;experiment=experimental evidence%2C no additional details recorded;product=N-terminally acetylated protein component of the large %2860S%29 ribosomal subunit%
chr02	0.887741	0.961206	301944	+	ID=NC_001134.7:EDS1:unknown_transcript_1;Parent=NC_001134.7:EDS1;locus_tag=YBR033W;note=Putative zinc cluster protein%3B YBR033W is not an essential gene;experiment=experimental evidence%2C no additional details recorded;product=Eds1p;protein_id=NP_009589
chr02	0.769461	0.861922	305976	-	ID=NC_001134.7:HMT1:unknown_transcript_1;Parent=NC_001134.7:HMT1;locus_tag=YBR034C;gene_synonym=RMT1;gene_synonym=ODP1;gene_synonym=HCP1;EC_number=2.1.1.-;note=Nuclear SAM-dependent mono- and asymmetric arginine dimethylating methyltransferase that modifi
chr02	0.894484	0.956511	306955	-	ID=NC_001134.7:PDX3:unknown_transcript_1;Parent=NC_001134.7:PDX3;locus_tag=YBR035C;EC_number=1.4.3.5;note=Pyridoxine %28pyridoxamine%29 phosphate oxidase%2C has homologs in E. coli and Myxococcus xanthus%3B transcription is under the general control of ni
chr02	0.556408	0.988539	310313	-	ID=NC_001134.7:CSG2:unknown_transcript_1;Parent=NC_001134.7:CSG2;locus_tag=YBR036C;gene_synonym=CLS2;note=Endoplasmic reticulum membrane protein%2C required for mannosylation of inositolphosphorylceramide and for growth at high calcium concentrations;expe
chr02	0.742608	0.716626	311451	-	ID=NC_001134.7:SCO1:unknown_transcript_1;Parent=NC_001134.7:SCO1;locus_tag=YBR037C;gene_synonym=PET161;note=Sco1p;experiment=experimental evidence%2C no additional details recorded;product=Copper-binding protein of the mitochondrial inner membrane%2C requ
chr02	0.865574	0.939144	311897	+	ID=NC_001134.7:CHS2:unknown_transcript_1;Parent=NC_001134.7:CHS2;locus_tag=YBR038W;EC_number=2.4.1.16;note=Chs2p;experiment=experimental evidence%2C no additional details recorded;product=Chitin synthase II%2C requires activation from zymogenic form in or
chr02	0.723215	0.737586	315575	+	ID=NC_001134.7:ATP3:unknown_transcript_1;Parent=NC_001134.7:ATP3;locus_tag=YBR039W;EC_number=3.6.3.14;note=Gamma subunit of the F1 sector of mitochondrial F1F0 ATP synthase%2C which is a large%2C evolutionarily conserved enzyme complex required for ATP sy
chr02	0.811294	0.923111	316968	+	ID=NC_001134.7:FIG1:unknown_transcript_1;Parent=NC_001134.7:FIG1;locus_tag=YBR040W;note=Integral membrane protein required for efficient mating%3B may participate in or regulate the low affinity Ca2%2B influx system%2C which affects intracellular signalin
chr02	0.862593	0.924181	318266	+	ID=NC_001134.7:FAT1:unknown_transcript_1;Parent=NC_001134.7:FAT1;locus_tag=YBR041W;note=Fatty acid transporter and very long-chain fatty acyl-CoA synthetase%2C may form a complex with Faa1p or Faa4p that imports and activates exogenous fatty acids;experim
chr02	0.887148	0.847973	321609	-	ID=NC_001134.7:CST26:unknown_transcript_1;Parent=NC_001134.7:CST26;locus_tag=YBR042C;note=Protein of unknown function%2C affects chromosome stability when overexpressed;experiment=experimental evidence%2C no additional details recorded;product=Cst26p;prot
chr02	0.796703	0.901048	323945	-	ID=NC_001134.7:QDR3:unknown_transcript_1;Parent=NC_001134.7:QDR3;locus_tag=YBR043C;gene_synonym=AQR2;note=Qdr3p;experiment=experimental evidence%2C no additional details recorded;product=Multidrug transporter of the major facilitator superfamily%2C requir
chr02	0.935838	0.900171	326058	-	ID=NC_001134.7:TCM62:unknown_transcript_1;Parent=NC_001134.7:TCM62;locus_tag=YBR044C;note=Tcm62p;experiment=experimental evidence%2C no additional details recorded;product=Protein involved in the assembly of the mitochondrial succinate dehydrogenase compl
chr02	0.588244	0.933037	330090	-	ID=NC_001134.7:GIP1:unknown_transcript_1;Parent=NC_001134.7:GIP1;locus_tag=YBR045C;note=Meiosis-specific regulatory subunit of the Glc7p protein phosphatase%2C regulates spore wall formation and septin organization%2C required for expression of some late
chr02	0.903695	0.965764	331509	-	ID=NC_001134.7:ZTA1:unknown_transcript_1;Parent=NC_001134.7:ZTA1;locus_tag=YBR046C;EC_number=1.6.5.5;note=Zta1p;experiment=experimental evidence%2C no additional details recorded;product=Zeta-crystallin homolog%2C found in the cytoplasm and nucleus%3B has
chr02	0.964565	0.963289	331831	+	ID=NC_001134.7:FMP23:unknown_transcript_1;Parent=NC_001134.7:FMP23;locus_tag=YBR047W;note=Putative protein of unknown function%3B the authentic%2C non-tagged protein is detected in highly purified mitochondria in high-throughput studies;experiment=experim
chr02	0.236844	0.485102	332829	+	ID=NC_001134.7:RPS11B:unknown_transcript_1;Parent=NC_001134.7:RPS11B;locus_tag=YBR048W;note=Rps11bp;experiment=experimental evidence%2C no additional details recorded;product=Protein component of the small %2840S%29 ribosomal subunit%3B identical to Rps11
chr02	0.710457	0.715306	336816	-	ID=NC_001134.7:REB1:unknown_transcript_1;Parent=NC_001134.7:REB1;locus_tag=YBR049C;gene_synonym=GRF2;note=Reb1p;experiment=experimental evidence%2C no additional details recorded;product=RNA polymerase I enhancer binding protein%3B DNA binding protein whi
chr02	0.849258	0.910497	338197	-	ID=NC_001134.7:REG2:unknown_transcript_1;Parent=NC_001134.7:REG2;locus_tag=YBR050C;note=Regulatory subunit of the Glc7p type-1 protein phosphatase%3B involved with Reg1p%2C Glc7p%2C and Snf1p in regulation of glucose-repressible genes%2C also involved in
chr02	0.942978	0.927336	339350	-	ID=NC_001134.7:RFS1:unknown_transcript_1;Parent=NC_001134.7:RFS1;locus_tag=YBR052C;note=Rfs1p;experiment=experimental evidence%2C no additional details recorded;product=Protein of unknown function%3B member of a flavodoxin-like fold protein family that in
chr02	0.791031	0.820352	340749	-	locus_tag=YBR053C;note=Ybr053cp;inference=non-experimental evidence%2C no additional details recorded;product=Putative protein of unknown function%3B induced by cell wall perturbation;protein_id=NP_009609.1;db_xref=SGD:S000000257;db_xref=GI:6319527;db_xre
chr02	0.856394	0.926791	343099	+	ID=NC_001134.7:YRO2:unknown_transcript_1;Parent=NC_001134.7:YRO2;locus_tag=YBR054W;note=Yro2p;experiment=experimental evidence%2C no additional details recorded;product=Putative protein of unknown function%3B the authentic%2C non-tagged protein is detecte
chr02	0.527378	0.847962	347299	-	ID=NC_001134.7:PRP6:unknown_transcript_1;Parent=NC_001134.7:PRP6;locus_tag=YBR055C;gene_synonym=TSM7269;gene_synonym=RNA6;note=Splicing factor%2C component of the U4%2FU6-U5 snRNP complex;experiment=experimental evidence%2C no additional details recorded;
chr02	0.720935	0.841023	347877	+	locus_tag=YBR056W;note=Ybr056wp;inference=non-experimental evidence%2C no additional details recorded;product=Putative cytoplasmic protein of unknown function;protein_id=NP_009612.1;db_xref=SGD:S000000260;db_xref=GI:6319530;db_xref=GeneID:852346;exon_numb
chr02	0.873869	0.914406	353291	-	ID=NC_001134.7:MUM2:unknown_transcript_1;Parent=NC_001134.7:MUM2;locus_tag=YBR057C;note=Mum2p;experiment=experimental evidence%2C no additional details recorded;product=Cytoplasmic protein essential for meiotic DNA replication and sporulation%3B interacts
chr02	0.797369	0.895327	356015	-	ID=NC_001134.7:UBP14:unknown_transcript_1;Parent=NC_001134.7:UBP14;locus_tag=YBR058C;gene_synonym=GID6;EC_number=3.1.2.15;note=Ubp14p;experiment=experimental evidence%2C no additional details recorded;product=Ubiquitin-specific protease that specifically
chr02	0.382825	0.818881	356564	-	ID=NC_001134.7:TSC3:unknown_transcript_1;Parent=NC_001134.7:TSC3;locus_tag=YBR058C-A;note=Tsc3p;experiment=experimental evidence%2C no additional details recorded;product=Protein that stimulates the activity of serine palmitoyltransferase %28Lcb1p%2C Lcb2
chr02	0.71133	0.910665	360185	-	ID=NC_001134.7:AKL1:unknown_transcript_1;Parent=NC_001134.7:AKL1;locus_tag=YBR059C;EC_number=2.7.1.-;note=Ser-Thr protein kinase%2C member %28with Ark1p and Prk1p%29 of the Ark kinase family%3B involved in endocytosis and actin cytoskeleton organization;e
chr02	0.95923	0.974719	362512	-	ID=NC_001134.7:ORC2:unknown_transcript_1;Parent=NC_001134.7:ORC2;locus_tag=YBR060C;gene_synonym=SIR5;gene_synonym=RRR1;note=Subunit of the origin recognition complex%2C which directs DNA replication by binding to replication origins and is also involved i
chr02	0.947309	0.963996	365717	-	ID=NC_001134.7:TRM7:unknown_transcript_1;Parent=NC_001134.7:TRM7;locus_tag=YBR061C;note=Trm7p;experiment=experimental evidence%2C no additional details recorded;product=2%27-O-ribose methyltransferase%2C methylates the 2%27-O-ribose of nucleotides at posi
chr02	0.710823	0.824642	366598	-	locus_tag=YBR062C;inference=non-experimental evidence%2C no additional details recorded;product=Ybr062cp;protein_id=NP_009618.2;db_xref=SGD:S000000266;db_xref=GI:50593118;db_xref=GeneID:852354;exon_number=1
chr02	0.700454	0.925575	368182	-	locus_tag=YBR063C;note=Ybr063cp;inference=non-experimental evidence%2C no additional details recorded;product=Putative protein of unknown function%3B YBR063C is not an essential gene;protein_id=NP_009619.1;db_xref=SGD:S000000267;db_xref=GI:6319538;db_xref
chr02	0.881319	0.964475	369676	-	ID=NC_001134.7:ECM2:unknown_transcript_1;Parent=NC_001134.7:ECM2;locus_tag=YBR065C;gene_synonym=SLT11;note=Pre-mRNA splicing factor%2C facilitates the cooperative formation of U2%2FU6 helix II in association with stem II in the spliceosome%2C function may
chr02	0.869657	0.948208	370697	-	ID=NC_001134.7:NRG2:unknown_transcript_1;Parent=NC_001134.7:NRG2;locus_tag=YBR066C;note=Transcriptional repressor that mediates glucose repression and negatively regulates filamentous growth%3B has similarity to Nrg1p;experiment=experimental evidence%2C n
chr02	0.691559	0.826167	372732	-	ID=NC_001134.7:TIP1:unknown_transcript_1;Parent=NC_001134.7:TIP1;locus_tag=YBR067C;EC_number=3.1.1.-;note=Tip1p;experiment=experimental evidence%2C no additional details recorded;product=Major cell wall mannoprotein with possible lipase activity%3B transc
chr02	0.910266	0.980261	375687	-	ID=NC_001134.7:BAP2:unknown_transcript_1;Parent=NC_001134.7:BAP2;locus_tag=YBR068C;note=High-affinity leucine permease%2C functions as a branched-chain amino acid permease involved in the uptake of leucine%2C isoleucine and valine%3B contains 12 predicted
chr02	0.844677	0.80903	378430	-	ID=NC_001134.7:TAT1:unknown_transcript_1;Parent=NC_001134.7:TAT1;locus_tag=YBR069C;gene_synonym=VAP1;gene_synonym=TAP1;note=Tat1p;experiment=experimental evidence%2C no additional details recorded;product=Amino acid transport protein for valine%2C leucine
chr02	0.735701	0.909986	379931	-	ID=NC_001134.7:ALG14:unknown_transcript_1;Parent=NC_001134.7:ALG14;locus_tag=YBR070C;note=Component of UDP-GlcNAc transferase required for the second step of dolichyl-linked oligosaccharide synthesis%3B anchors the catalytic subunit Alg13p to the ER membr
chr02	0.814009	0.861849	380408	+	locus_tag=YBR071W;note=Ybr071wp;inference=non-experimental evidence%2C no additional details recorded;product=Putative protein of unknown function%3B %28GFP%29-fusion and epitope-tagged proteins localize to the cytoplasm%3B mRNA expression may be regulate
chr02	0.885756	0.85497	382027	+	ID=NC_001134.7:HSP26:unknown_transcript_1;Parent=NC_001134.7:HSP26;locus_tag=YBR072W;note=Small heat shock protein %28sHSP%29 with chaperone activity%3B forms hollow%2C sphere-shaped oligomers that suppress unfolded proteins aggregation%3B oligomer activa
chr02	0.915099	0.851633	383016	-	locus_tag=YBR072C-A;note=Ybr072c-ap;inference=non-experimental evidence%2C no additional details recorded;product=Putative protein of unknown function%3B identified by fungal homology and RT-PCR;protein_id=NP_878048.1;db_xref=SGD:S000028532;db_xref=GI:334
chr02	0.934612	0.935746	383209	+	ID=NC_001134.7:RDH54:unknown_transcript_1;Parent=NC_001134.7:RDH54;locus_tag=YBR073W;gene_synonym=TID1;note=Rdh54p;experiment=experimental evidence%2C no additional details recorded;product=DNA-dependent ATPase%2C stimulates strand exchange by modifying t
chr02	0.915899	0.971808	386281	+	locus_tag=YBR074W;gene_synonym=YBR075W;note=Ybr074wp;inference=non-experimental evidence%2C no additional details recorded;product=Putative metalloprotease;protein_id=NP_009630.2;db_xref=SGD:S000000278;db_xref=GI:37362618;db_xref=GeneID:852366;exon_number
chr02	0.67657	0.815217	390369	+	ID=NC_001134.7:ECM8:unknown_transcript_1;Parent=NC_001134.7:ECM8;locus_tag=YBR076W;note=Non-essential protein of unknown function;experiment=experimental evidence%2C no additional details recorded;product=Ecm8p;protein_id=NP_009632.1;db_xref=SGD:S00000028
chr02	0.644323	0.805334	392287	-	ID=NC_001134.7:SLM4:unknown_transcript_1;Parent=NC_001134.7:SLM4;locus_tag=YBR077C;gene_synonym=GSE1;gene_synonym=NIR1;gene_synonym=EGO3;note=Slm4p;experiment=experimental evidence%2C no additional details recorded;product=Component of the EGO complex%2C
chr02	0.742242	0.750732	393118	+	ID=NC_001134.7:ECM33:unknown_transcript_1;Parent=NC_001134.7:ECM33;locus_tag=YBR078W;note=GPI-anchored protein of unknown function%2C has a possible role in apical bud growth%3B GPI-anchoring on the plasma membrane crucial to function%3B phosphorylated in
chr02	0.922811	0.893504	398271	-	ID=NC_001134.7:RPG1:unknown_transcript_1;Parent=NC_001134.7:RPG1;locus_tag=YBR079C;gene_synonym=TIF32;note=Subunit of the core complex of translation initiation factor 3%28eIF3%29%2C essential for translation%3B part of a subcomplex %28Prt1p-Rpg1p-Nip1p%2
chr02	0.887104	0.914143	400884	-	ID=NC_001134.7:SEC18:unknown_transcript_1;Parent=NC_001134.7:SEC18;locus_tag=YBR080C;gene_synonym=ANU4;note=Sec18p;experiment=experimental evidence%2C no additional details recorded;product=ATPase required for the release of Sec17p during the %27priming%2
chr02	0.726076	0.955802	405245	-	ID=NC_001134.7:SPT7:unknown_transcript_1;Parent=NC_001134.7:SPT7;locus_tag=YBR081C;gene_synonym=GIT2;note=Subunit of the SAGA transcriptional regulatory complex%2C involved in proper assembly of the complex%3B also present as a C-terminally truncated form
chr02	0.88237	0.966371	407163	-	ID=NC_001134.7:UBC4:unknown_transcript_1;Parent=NC_001134.7:UBC4;locus_tag=YBR082C;EC_number=6.3.2.19;note=Ubiquitin-conjugating enzyme %28E2%29%2C mediates degradation of short-lived and abnormal proteins%3B interacts with E3-CaM in ubiquitinating calmod
chr02	0.822342	0.87716	409163	+	ID=NC_001134.7:TEC1:unknown_transcript_1;Parent=NC_001134.7:TEC1;locus_tag=YBR083W;gene_synonym=ROC1;note=Transcription factor required for full Ty1 epxression%2C Ty1-mediated gene activation%2C and haploid invasive and diploid pseudohyphal growth%3B TEA%
chr02	0.962173	0.981531	411048	+	ID=NC_001134.7:MIS1:unknown_transcript_1;Parent=NC_001134.7:MIS1;locus_tag=YBR084W;EC_number=6.3.4.3;note=Mitochondrial C1-tetrahydrofolate synthase%2C involved in interconversion between different oxidation states of tetrahydrofolate %28THF%29%3B provide
chr02	0.706598	0.664161	414747	-	ID=NC_001134.7:RPL19A:unknown_transcript_1;Parent=NC_001134.7:RPL19A;locus_tag=YBR084C-A;note=Rpl19ap;experiment=experimental evidence%2C no additional details recorded;product=Protein component of the large %2860S%29 ribosomal subunit%2C nearly identical
chr02	0.824984	0.891553	415255	-	ID=NC_001134.7:RPL19A:unknown_transcript_1;Parent=NC_001134.7:RPL19A;locus_tag=YBR084C-A;note=Rpl19ap;experiment=experimental evidence%2C no additional details recorded;product=Protein component of the large %2860S%29 ribosomal subunit%2C nearly identical
chr02	0.814393	0.764356	415977	+	ID=NC_001134.7:AAC3:unknown_transcript_1;Parent=NC_001134.7:AAC3;locus_tag=YBR085W;gene_synonym=ANC3;note=Mitochondrial inner membrane ADP%2FATP translocator%2C exchanges cytosolic ADP for mitochondrially synthesized ATP%3B expressed under anaerobic condi
chr02	0.896825	0.950702	419158	-	locus_tag=YBR085C-A;note=Ybr085c-ap;inference=non-experimental evidence%2C no additional details recorded;product=Putative protein of unknown function%3B green fluorescent protein %28GFP%29-fusion protein localizes to the cytoplasm and to the nucleus;prot
chr02	0.726715	0.957843	423035	-	ID=NC_001134.7:IST2:unknown_transcript_1;Parent=NC_001134.7:IST2;locus_tag=YBR086C;note=Plasma membrane protein that may be involved in osmotolerance%2C localizes to the mother cell in small-budded cells and to the bud in medium- and large-budded cells%3B
chr02	0.915528	0.947514	423759	+	ID=NC_001134.7:RFC5:unknown_transcript_1;Parent=NC_001134.7:RFC5;locus_tag=YBR087W;note=Subunit of heteropentameric Replication factor C %28RF-C%29%2C which is a DNA binding protein and ATPase that acts as a clamp loader of the proliferating cell nuclear
chr02	0.712198	0.952537	425760	-	ID=NC_001134.7:POL30:unknown_transcript_1;Parent=NC_001134.7:POL30;locus_tag=YBR088C;note=Proliferating cell nuclear antigen %28PCNA%29%2C functions as the sliding clamp for DNA polymerase delta%3B may function as a docking site for other proteins require
chr02	0.843128	0.943234	426483	-	ID=NC_001134.7:NHP6B:unknown_transcript_1;Parent=NC_001134.7:NHP6B;locus_tag=YBR089C-A;gene_synonym=YBR090C-A;note=Nhp6bp;experiment=experimental evidence%2C no additional details recorded;product=High-mobility group non-histone chromatin protein%2C funct
chr02	0.967659	0.971792	427052	-	locus_tag=YBR090C;note=Ybr090cp;inference=non-experimental evidence%2C no additional details recorded;product=Putative protein of unknown function%3B green fluorescent protein %28GFP%29-fusion protein localizes to the cytoplasm and nucleus;protein_id=NP_0
chr02	0.965038	0.98596	427478	-	ID=NC_001134.7:MRS5:unknown_transcript_1;Parent=NC_001134.7:MRS5;locus_tag=YBR091C;gene_synonym=TIM12;note=Mrs5p;experiment=experimental evidence%2C no additional details recorded;product=Essential protein of the inner mitochondrial membrane%2C peripheral
chr02	0.724084	0.818267	429095	-	ID=NC_001134.7:PHO3:unknown_transcript_1;Parent=NC_001134.7:PHO3;locus_tag=YBR092C;EC_number=3.1.3.2;note=Pho3p;experiment=experimental evidence%2C no additional details recorded;product=Constitutively expressed acid phosphatase similar to Pho5p%3B brough
chr02	0.936567	0.954747	430945	-	ID=NC_001134.7:PHO5:unknown_transcript_1;Parent=NC_001134.7:PHO5;locus_tag=YBR093C;EC_number=3.1.3.2;note=Repressible acid phosphatase %281 of 3%29 that also mediates extracellular nucleotide-derived phosphate hydrolysis%3B secretory pathway derived cell
chr02	0.941825	0.962258	432030	+	ID=NC_001134.7:PBY1:unknown_transcript_1;Parent=NC_001134.7:PBY1;locus_tag=YBR094W;note=Putative tubulin tyrosine ligase associated with P-bodies;experiment=experimental evidence%2C no additional details recorded;product=Pby1p;protein_id=NP_009652.1;db_xr
chr02	0.876373	0.695839	435692	-	ID=NC_001134.7:RXT2:unknown_transcript_1;Parent=NC_001134.7:RXT2;locus_tag=YBR095C;gene_synonym=RAF60;note=Subunit of the histone deacetylase Rpd3L complex%3B possibly involved in cell fusion and invasive growth;experiment=experimental evidence%2C no addi
chr02	0.902279	0.981611	436015	+	locus_tag=YBR096W;note=Ybr096wp;inference=non-experimental evidence%2C no additional details recorded;product=Putative protein of unknown function%3B green fluorescent protein %28GFP%29-fusion protein localizes to the ER;protein_id=NP_009654.1;db_xref=SGD
chr02	0.938418	0.782721	436945	+	ID=NC_001134.7:VPS15:unknown_transcript_1;Parent=NC_001134.7:VPS15;locus_tag=YBR097W;gene_synonym=VPL19;gene_synonym=VAC4;gene_synonym=GRD8;EC_number=2.7.1.-;note=Vps15p;experiment=experimental evidence%2C no additional details recorded;product=Myristoyla
chr02	0.826007	0.740814	441509	+	ID=NC_001134.7:MMS4:unknown_transcript_1;Parent=NC_001134.7:MMS4;locus_tag=YBR098W;gene_synonym=YBR100W;gene_synonym=SLX2;note=Subunit of the structure-specific Mms4p-Mus81p endonuclease that cleaves branched DNA%3B involved in recombination and DNA repai
chr02	0.842391	0.834662	444687	-	ID=NC_001134.7:FES1:unknown_transcript_1;Parent=NC_001134.7:FES1;locus_tag=YBR101C;note=Hsp70 %28Ssa1p%29 nucleotide exchange factor%2C cytosolic homolog of Sil1p%2C which is the nucleotide exchange factor for BiP %28Kar2p%29 in the endoplasmic reticulum;
chr02	0.67007	0.901084	447317	-	ID=NC_001134.7:EXO84:unknown_transcript_1;Parent=NC_001134.7:EXO84;locus_tag=YBR102C;gene_synonym=USA3;note=Exo84p;experiment=experimental evidence%2C no additional details recorded;product=Essential protein with dual roles in spliceosome assembly and exo
chr02	0.8422	0.852308	447703	+	ID=NC_001134.7:SIF2:unknown_transcript_1;Parent=NC_001134.7:SIF2;locus_tag=YBR103W;gene_synonym=EMB1;note=WD40 repeat-containing subunit of the Set3C histone deacetylase complex%2C which represses early%2Fmiddle sporulation genes%3B antagonizes telomeric
chr02	0.860561	0.966172	449661	+	ID=NC_001134.7:YMC2:unknown_transcript_1;Parent=NC_001134.7:YMC2;locus_tag=YBR104W;note=Ymc2p;experiment=experimental evidence%2C no additional details recorded;product=Mitochondrial protein%2C putative inner membrane transporter with a role in oleate met
chr02	0.902449	0.909569	451963	-	ID=NC_001134.7:VID24:unknown_transcript_1;Parent=NC_001134.7:VID24;locus_tag=YBR105C;gene_synonym=GID4;note=Vid24p;experiment=experimental evidence%2C no additional details recorded;product=Peripheral membrane protein located at Vid %28vacuole import and
chr02	0.912682	0.964537	452652	+	ID=NC_001134.7:PHO88:unknown_transcript_1;Parent=NC_001134.7:PHO88;locus_tag=YBR106W;note=Probable membrane protein%2C involved in phosphate transport%3B pho88 pho86 double null mutant exhibits enhanced synthesis of repressible acid phosphatase at high in
chr02	0.769357	0.885965	454524	-	ID=NC_001134.7:IML3:unknown_transcript_1;Parent=NC_001134.7:IML3;locus_tag=YBR107C;gene_synonym=MCM19;note=Protein with a role in kinetochore function%2C localizes to the outer kinetochore in a Ctf19p-dependent manner%2C interacts with Chl4p and Ctf19p;ex
chr02	0.855471	0.945016	454816	+	ID=NC_001134.7:AIM3:unknown_transcript_1;Parent=NC_001134.7:AIM3;locus_tag=YBR108W;note=Protein interacting with Rsv167p%3B null mutant displays decreased frequency of mitochondrial genome loss %28petite formation%29 and severe growth defect in minimal gl
chr02	0.823234	0.979365	458356	-	ID=NC_001134.7:CMD1:unknown_transcript_1;Parent=NC_001134.7:CMD1;locus_tag=YBR109C;note=Cmd1p;experiment=experimental evidence%2C no additional details recorded;product=Calmodulin%3B Ca%2B%2B binding protein that regulates Ca%2B%2B independent processes %
chr02	0.883112	0.987616	458866	+	ID=NC_001134.7:ALG1:unknown_transcript_1;Parent=NC_001134.7:ALG1;locus_tag=YBR110W;EC_number=2.4.1.-;note=Mannosyltransferase%2C involved in asparagine-linked glycosylation in the endoplasmic reticulum %28ER%29%3B essential for viability%2C mutation is fu
chr02	0.635904	0.872622	461867	-	ID=NC_001134.7:YSA1:unknown_transcript_1;Parent=NC_001134.7:YSA1;locus_tag=YBR111C;gene_synonym=RMA2;note=Ysa1p;experiment=experimental evidence%2C no additional details recorded;product=Nudix hydrolase family member with ADP-ribose pyrophosphatase activi
chr02	0.474505	0.965086	462133	+	ID=NC_001134.7:SUS1:unknown_transcript_1;Parent=NC_001134.7:SUS1;locus_tag=YBR111W-A;note=Sus1p;experiment=experimental evidence%2C no additional details recorded;product=Protein involved in mRNA export coupled transcription activation%3B component of the
chr02	0.843661	0.928796	465764	-	ID=NC_001134.7:CYC8:unknown_transcript_1;Parent=NC_001134.7:CYC8;locus_tag=YBR112C;gene_synonym=SSN6;gene_synonym=CRT8;note=General transcriptional co-repressor%2C acts together with Tup1p%3B also acts as part of a transcriptional co-activator complex tha
chr02	0.431083	0.84608	467242	+	ID=NC_001134.7:RAD16:unknown_transcript_1;Parent=NC_001134.7:RAD16;locus_tag=YBR114W;gene_synonym=PSO5;note=Rad16p;experiment=experimental evidence%2C no additional details recorded;product=Protein that recognizes and binds damaged DNA in an ATP-dependent
chr02	0.623654	0.725094	473920	-	ID=NC_001134.7:LYS2:unknown_transcript_1;Parent=NC_001134.7:LYS2;locus_tag=YBR115C;EC_number=1.2.1.31;note=Lys2p;experiment=experimental evidence%2C no additional details recorded;product=Alpha aminoadipate reductase%2C catalyzes the reduction of alpha-am
chr02	0.661634	0.943131	476431	-	ID=NC_001134.7:TKL2:unknown_transcript_1;Parent=NC_001134.7:TKL2;locus_tag=YBR117C;EC_number=2.2.1.1;note=Transketolase%2C similar to Tkl1p%3B catalyzes conversion of xylulose-5-phosphate and ribose-5-phosphate to sedoheptulose-7-phosphate and glyceraldeh
chr02	0.659267	0.969942	477665	+	ID=NC_001134.7:TEF2:unknown_transcript_1;Parent=NC_001134.7:TEF2;locus_tag=YBR118W;note=Translational elongation factor EF-1 alpha%3B also encoded by TEF1%3B functions in the binding reaction of aminoacyl-tRNA %28AA-tRNA%29 to ribosomes;experiment=experim
chr02	0.792777	0.876788	479332	+	ID=NC_001134.7:MUD1:unknown_transcript_1;Parent=NC_001134.7:MUD1;locus_tag=YBR119W;note=U1 snRNP A protein%2C homolog of human U1-A%3B involved in nuclear mRNA splicing;experiment=experimental evidence%2C no additional details recorded;product=Mud1p;prote
chr02	0.911474	0.936645	480917	-	ID=NC_001134.7:CBP6:unknown_transcript_1;Parent=NC_001134.7:CBP6;locus_tag=YBR120C;note=Mitochondrial translational activator of the COB mRNA%3B phosphorylated;experiment=experimental evidence%2C no additional details recorded;product=Cbp6p;protein_id=NP_
chr02	0.950971	0.933718	483361	-	ID=NC_001134.7:GRS1:unknown_transcript_1;Parent=NC_001134.7:GRS1;locus_tag=YBR121C;EC_number=6.1.1.14;note=Grs1p;experiment=experimental evidence%2C no additional details recorded;product=Cytoplasmic and mitochondrial glycyl-tRNA synthase that ligates gly
chr02	0.867133	0.872218	484497	-	ID=NC_001134.7:MRPL36:unknown_transcript_1;Parent=NC_001134.7:MRPL36;locus_tag=YBR122C;note=Mrpl36p;experiment=experimental evidence%2C no additional details recorded;product=Mitochondrial ribosomal protein of the large subunit%3B overproduction suppresse
chr02	0.947064	0.951276	486685	-	ID=NC_001134.7:TFC1:unknown_transcript_1;Parent=NC_001134.7:TFC1;locus_tag=YBR123C;note=Tfc1p;experiment=experimental evidence%2C no additional details recorded;product=One of six subunits of the RNA polymerase III transcription initiation factor complex
chr02	0.600944	0.875993	488374	-	ID=NC_001134.7:PTC4:unknown_transcript_1;Parent=NC_001134.7:PTC4;locus_tag=YBR125C;gene_synonym=GCT1;EC_number=3.1.3.16;note=Ptc4p;experiment=experimental evidence%2C no additional details recorded;product=Cytoplasmic type 2C protein phosphatase%3B identi
chr02	0.842847	0.903667	490386	-	ID=NC_001134.7:TPS1:unknown_transcript_1;Parent=NC_001134.7:TPS1;locus_tag=YBR126C;gene_synonym=TSS1;gene_synonym=GLC6;gene_synonym=GGS1;gene_synonym=FDP1;gene_synonym=CIF1;gene_synonym=BYP1;EC_number=2.4.1.15;note=Tps1p;experiment=experimental evidence%2
chr02	0.945117	0.981196	492816	-	ID=NC_001134.7:VMA2:unknown_transcript_1;Parent=NC_001134.7:VMA2;locus_tag=YBR127C;gene_synonym=VAT2;EC_number=3.6.3.14;note=Vma2p;experiment=experimental evidence%2C no additional details recorded;product=Subunit B of the eight-subunit V1 peripheral memb
chr02	0.374542	0.662523	494109	-	ID=NC_001134.7:ATG14:unknown_transcript_1;Parent=NC_001134.7:ATG14;locus_tag=YBR128C;gene_synonym=APG14;gene_synonym=CVT12;note=Subunit of an autophagy-specific phosphatidylinositol 3-kinase complex %28with Vps34p%2C Vps15p%2C and Vps30p%29 required for o
chr02	0.911006	0.977887	495333	-	ID=NC_001134.7:OPY1:unknown_transcript_1;Parent=NC_001134.7:OPY1;locus_tag=YBR129C;note=Protein of unknown function%2C overproduction blocks cell cycle arrest in the presence of mating pheromone%3B the authentic%2C non-tagged protein is detected in highly
chr02	0.91147	0.920298	496863	-	ID=NC_001134.7:SHE3:unknown_transcript_1;Parent=NC_001134.7:SHE3;locus_tag=YBR130C;note=She3p;experiment=experimental evidence%2C no additional details recorded;product=Protein that acts as an adaptor between Myo4p and the She2p-mRNA complex%3B part of th
chr02	0.953323	0.969685	497157	+	ID=NC_001134.7:CCZ1:unknown_transcript_1;Parent=NC_001134.7:CCZ1;locus_tag=YBR131W;gene_synonym=CVT16;note=Protein involved in vacuolar assembly%2C essential for autophagy and the cytoplasm-to-vacuole pathway;experiment=experimental evidence%2C no additio
chr02	0.88736	0.918029	501436	-	ID=NC_001134.7:AGP2:unknown_transcript_1;Parent=NC_001134.7:AGP2;locus_tag=YBR132C;note=High affinity polyamine permease%2C preferentially uses spermidine over putrescine%3B expression is down-regulated by osmotic stress%3B plasma membrane carnitine trans
chr02	0.818146	0.92352	504281	-	ID=NC_001134.7:HSL7:unknown_transcript_1;Parent=NC_001134.7:HSL7;locus_tag=YBR133C;note=Protein arginine N-methyltransferase that exhibits septin and Hsl1p-dependent bud neck localization and periodic Hsl1p-dependent phosphorylation%3B required along with
chr02	0.821112	0.875241	504848	+	ID=NC_001134.7:CKS1:unknown_transcript_1;Parent=NC_001134.7:CKS1;locus_tag=YBR135W;note=Cyclin-dependent protein kinase regulatory subunit and adaptor%3B modulates proteolysis of M-phase targets through interactions with the proteasome%3B role in transcri
chr02	0.963547	0.974854	505662	+	ID=NC_001134.7:MEC1:unknown_transcript_1;Parent=NC_001134.7:MEC1;locus_tag=YBR136W;gene_synonym=SAD3;gene_synonym=ESR1;note=Mec1p;experiment=experimental evidence%2C no additional details recorded;product=Genome integrity checkpoint protein and PI kinase
chr02	0.897235	0.850329	513038	+	locus_tag=YBR137W;note=Ybr137wp;inference=non-experimental evidence%2C no additional details recorded;product=Protein of unknown function%3B localized to the cytoplasm%3B binds to Replication Protein A %28RPA%29%3B YBR137W is not an essential gene;protein
chr02	0.718779	0.802747	515330	-	locus_tag=YBR138C;note=Ybr138cp;inference=non-experimental evidence%2C no additional details recorded;product=Cytoplasmic protein of unknown function%2C potentially phosphorylated by Cdc28p%3B YBR138C is not an essential gene;protein_id=NP_009696.1;db_xre
chr02	0.820087	0.91876	515658	+	locus_tag=YBR139W;EC_number=3.4.16.-;note=Ybr139wp;inference=non-experimental evidence%2C no additional details recorded;product=Putative serine type carboxypeptidase with a role in phytochelatin synthesis%3B green fluorescent protein %28GFP%29-fusion pro
chr02	0.911576	0.958353	526622	-	ID=NC_001134.7:IRA1:unknown_transcript_1;Parent=NC_001134.7:IRA1;locus_tag=YBR140C;gene_synonym=PPD1;gene_synonym=GLC1;note=Ira1p;experiment=experimental evidence%2C no additional details recorded;product=GTPase-activating protein that negatively regulate
chr02	0.473632	0.746198	528032	-	locus_tag=YBR141C;note=Ybr141cp;inference=non-experimental evidence%2C no additional details recorded;product=Putative protein of unknown function%3B green fluorescent protein %28GFP%29-fusion protein localizes to the nucleolus%3B YBR141C is not an essent
chr02	0.874763	0.851974	528311	+	ID=NC_001134.7:MAK5:unknown_transcript_1;Parent=NC_001134.7:MAK5;locus_tag=YBR142W;note=Mak5p;experiment=experimental evidence%2C no additional details recorded;product=Essential nucleolar protein%2C putative DEAD-box RNA helicase required for maintenance
chr02	0.691093	0.878957	532176	-	ID=NC_001134.7:SUP45:unknown_transcript_1;Parent=NC_001134.7:SUP45;locus_tag=YBR143C;gene_synonym=SUP47;gene_synonym=SUP1;gene_synonym=SAL4;note=Sup45p;experiment=experimental evidence%2C no additional details recorded;product=Polypeptide release factor i
chr02	0.550524	0.919553	533756	+	ID=NC_001134.7:ADH5:unknown_transcript_1;Parent=NC_001134.7:ADH5;locus_tag=YBR145W;EC_number=1.1.1.1;note=Alcohol dehydrogenase isoenzyme V%3B involved in ethanol production;experiment=experimental evidence%2C no additional details recorded;product=Adh5p;
chr02	0.870488	0.939706	535254	+	ID=NC_001134.7:MRPS9:unknown_transcript_1;Parent=NC_001134.7:MRPS9;locus_tag=YBR146W;note=Mrps9p;experiment=experimental evidence%2C no additional details recorded;product=Mitochondrial ribosomal protein of the small subunit;protein_id=NP_009704.1;db_xref
chr02	0.825218	0.865879	536569	+	locus_tag=YBR147W;note=Ybr147wp;inference=non-experimental evidence%2C no additional details recorded;product=Putative protein of unknown function%3B the authentic%2C non-tagged protein is detected in highly purified mitochondria in high-throughput studie
chr02	0.518306	0.673147	537870	+	ID=NC_001134.7:YSW1:unknown_transcript_1;Parent=NC_001134.7:YSW1;locus_tag=YBR148W;note=Ysw1p;experiment=experimental evidence%2C no additional details recorded;product=Protein expressed specifically in spores;protein_id=NP_009706.1;db_xref=SGD:S000000352
chr02	0.809533	0.934585	539981	+	ID=NC_001134.7:ARA1:unknown_transcript_1;Parent=NC_001134.7:ARA1;locus_tag=YBR149W;EC_number=1.1.1.117;note=NADP%2B dependent arabinose dehydrogenase%2C involved in carbohydrate metabolism%3B purified as homodimer%3B naturally occurs with a N-terminus deg
chr02	0.261846	0.891961	544487	-	ID=NC_001134.7:TBS1:unknown_transcript_1;Parent=NC_001134.7:TBS1;locus_tag=YBR150C;note=Tbs1p;experiment=experimental evidence%2C no additional details recorded;product=Putative protein of unknown function%3B the authentic%2C non-tagged protein is detecte
chr02	0.437561	0.792862	545022	+	ID=NC_001134.7:APD1:unknown_transcript_1;Parent=NC_001134.7:APD1;locus_tag=YBR151W;note=Protein of unknown function%2C required for normal localization of actin patches and for normal tolerance of sodium ions and hydrogen peroxide%3B localizes to both cyt
chr02	0.748488	0.934439	546370	+	ID=NC_001134.7:SPP381:unknown_transcript_1;Parent=NC_001134.7:SPP381;locus_tag=YBR152W;note=mRNA splicing factor%2C component of U4%2FU6.U5 tri-snRNP%3B interacts genetically and physically with Prp38p;experiment=experimental evidence%2C no additional det
chr02	0.710224	0.896435	547454	+	ID=NC_001134.7:RIB7:unknown_transcript_1;Parent=NC_001134.7:RIB7;locus_tag=YBR153W;note=Rib7p;experiment=experimental evidence%2C no additional details recorded;product=Diaminohydroxyphoshoribosylaminopyrimidine deaminase%3B catalyzes the second step of t
chr02	0.932277	0.962405	549003	-	ID=NC_001134.7:RPB5:unknown_transcript_1;Parent=NC_001134.7:RPB5;locus_tag=YBR154C;EC_number=2.7.7.6;note=Rpb5p;experiment=experimental evidence%2C no additional details recorded;product=RNA polymerase subunit ABC27%2C common to RNA polymerases I%2C II%2C
chr02	0.804825	0.954057	549765	+	ID=NC_001134.7:CNS1:unknown_transcript_1;Parent=NC_001134.7:CNS1;locus_tag=YBR155W;note=TPR-containing co-chaperone%3B binds both Hsp82p %28Hsp90%29 and Ssa1p %28Hsp70%29 and stimulates the ATPase activity of SSA1%2C ts mutants reduce Hsp82p function whil
chr02	0.791417	0.854171	553194	-	ID=NC_001134.7:SLI15:unknown_transcript_1;Parent=NC_001134.7:SLI15;locus_tag=YBR156C;note=Subunit of the Ipl1p-Sli15p-Bir1p complex that regulates kinetochore-microtubule attachments%2C activation of the spindle tension checkpoint%2C and mitotic spindle d
chr02	0.870798	0.907745	554304	-	ID=NC_001134.7:ICS2:unknown_transcript_1;Parent=NC_001134.7:ICS2;locus_tag=YBR157C;note=Protein of unknown function%3B null mutation does not confer any obvious defects in growth%2C spore germination%2C viability%2C or carbohydrate utilization;experiment=
chr02	0.665902	0.91838	556543	+	ID=NC_001134.7:AMN1:unknown_transcript_1;Parent=NC_001134.7:AMN1;locus_tag=YBR158W;gene_synonym=CST13;gene_synonym=ICS4;note=Protein required for daughter cell separation%2C multiple mitotic checkpoints%2C and chromosome stability%3B contains 12 degenerat
chr02	0.748158	0.95669	558679	+	ID=NC_001134.7:IFA38:unknown_transcript_1;Parent=NC_001134.7:IFA38;locus_tag=YBR159W;EC_number=1.-.-.-;note=Microsomal beta-keto-reductase%3B contains oleate response element %28ORE%29 sequence in the promoter region%3B mutants exhibit reduced VLCFA synth
chr02	0.78644	0.884016	560072	+	ID=NC_001134.7:CDC28:unknown_transcript_1;Parent=NC_001134.7:CDC28;locus_tag=YBR160W;gene_synonym=SRM5;gene_synonym=HSL5;gene_synonym=CDK1;EC_number=2.7.1.-;note=Cdc28p;experiment=experimental evidence%2C no additional details recorded;product=Catalytic s
chr02	0.898867	0.937446	561629	+	ID=NC_001134.7:CSH1:unknown_transcript_1;Parent=NC_001134.7:CSH1;locus_tag=YBR161W;note=Probable catalytic subunit of a mannosylinositol phosphorylceramide %28MIPC%29 synthase%2C forms a complex with probable regulatory subunit Csg2p%3B function in sphing
chr02	0.821812	0.865582	564565	-	ID=NC_001134.7:TOS1:unknown_transcript_1;Parent=NC_001134.7:TOS1;locus_tag=YBR162C;note=Tos1p;experiment=experimental evidence%2C no additional details recorded;product=Covalently-bound cell wall protein of unknown function%3B identified as a cell cycle r
chr02	0.771474	0.837586	565226	+	ID=NC_001134.7:YSY6:unknown_transcript_1;Parent=NC_001134.7:YSY6;locus_tag=YBR162W-A;note=Ysy6p;experiment=experimental evidence%2C no additional details recorded;product=Protein whose expression suppresses a secretory pathway mutation in E. coli%3B has s
chr02	0.754635	0.744927	565718	+	ID=NC_001134.7:DEM1:unknown_transcript_1;Parent=NC_001134.7:DEM1;locus_tag=YBR163W;note=Protein of unknown function%2C shows similarity to RNA-processing protein Pta1p;experiment=experimental evidence%2C no additional details recorded;product=Dem1p;protei
chr02	0.815565	0.710236	568421	-	ID=NC_001134.7:ARL1:unknown_transcript_1;Parent=NC_001134.7:ARL1;locus_tag=YBR164C;gene_synonym=DLP2;note=Soluble GTPase with a role in regulation of membrane traffic%3B regulates potassium influx%3B G protein of the Ras superfamily%2C similar to ADP-ribo
chr02	0.865982	0.916731	568847	+	ID=NC_001134.7:UBS1:unknown_transcript_1;Parent=NC_001134.7:UBS1;locus_tag=YBR165W;note=Ubs1p;experiment=experimental evidence%2C no additional details recorded;product=Ubiquitin-conjugating enzyme suppressor that functions as a general positive regulator
chr02	0.902334	0.899089	571195	-	ID=NC_001134.7:TYR1:unknown_transcript_1;Parent=NC_001134.7:TYR1;locus_tag=YBR166C;EC_number=1.3.1.13;note=Tyr1p;experiment=experimental evidence%2C no additional details recorded;product=Prephenate dehydrogenase involved in tyrosine biosynthesis%2C expre
chr02	0.906011	0.905348	571885	-	ID=NC_001134.7:POP7:unknown_transcript_1;Parent=NC_001134.7:POP7;locus_tag=YBR167C;gene_synonym=RPP2;note=Subunit of both RNase MRP%2C which cleaves pre-rRNA%2C and nuclear RNase P%2C which cleaves tRNA precursors to generate mature 5%27 ends;experiment=e
chr02	0.88013	0.858183	572366	+	ID=NC_001134.7:PEX32:unknown_transcript_1;Parent=NC_001134.7:PEX32;locus_tag=YBR168W;note=Pex32p;experiment=experimental evidence%2C no additional details recorded;product=Peroxisomal integral membrane protein%2C involved in negative regulation of peroxis
chr02	0.517511	0.42075	575991	-	ID=NC_001134.7:SSE2:unknown_transcript_1;Parent=NC_001134.7:SSE2;locus_tag=YBR169C;note=Sse2p;experiment=experimental evidence%2C no additional details recorded;product=Member of the heat shock protein 70 %28HSP70%29 family%3B may be involved in protein f
chr02	0.86384	0.820016	578081	-	ID=NC_001134.7:NPL4:unknown_transcript_1;Parent=NC_001134.7:NPL4;locus_tag=YBR170C;gene_synonym=HRD4;note=Npl4p;experiment=experimental evidence%2C no additional details recorded;product=Endoplasmic reticulum and nuclear membrane protein%2C forms a comple
chr02	0.909911	0.948057	578359	+	ID=NC_001134.7:SEC66:unknown_transcript_1;Parent=NC_001134.7:SEC66;locus_tag=YBR171W;gene_synonym=SEC71;gene_synonym=HSS1;note=Sec66p;experiment=experimental evidence%2C no additional details recorded;product=Non-essential subunit of Sec63 complex %28Sec6
chr02	0.760681	0.89072	581367	-	ID=NC_001134.7:SMY2:unknown_transcript_1;Parent=NC_001134.7:SMY2;locus_tag=YBR172C;note=Smy2p;experiment=experimental evidence%2C no additional details recorded;product=Protein of unknown function that interacts with Myo2p%3B has similarity to S. pombe Mp
chr02	0.978518	0.961438	582167	-	ID=NC_001134.7:UMP1:unknown_transcript_1;Parent=NC_001134.7:UMP1;locus_tag=YBR173C;gene_synonym=RNS2;note=Ump1p;experiment=experimental evidence%2C no additional details recorded;product=Short-lived chaperone required for correct maturation of the 20S pro
chr02	0.79931	0.907094	582403	+	ID=NC_001134.7:SWD3:unknown_transcript_1;Parent=NC_001134.7:SWD3;locus_tag=YBR175W;gene_synonym=SAF35;gene_synonym=CPS30;note=Swd3p;experiment=experimental evidence%2C no additional details recorded;product=Essential subunit of the COMPASS %28Set1C%29 com
chr02	0.657226	0.88167	583715	+	ID=NC_001134.7:ECM31:unknown_transcript_1;Parent=NC_001134.7:ECM31;locus_tag=YBR176W;EC_number=2.1.2.11;note=Ketopantoate hydroxymethyltransferase%2C required for pantothenic acid biosynthesis%2C converts 2-oxoisovalerate into 2-dehydropantoate;experiment
chr02	0.858069	0.940714	586157	-	ID=NC_001134.7:EHT1:unknown_transcript_1;Parent=NC_001134.7:EHT1;locus_tag=YBR177C;note=Eht1p;experiment=experimental evidence%2C no additional details recorded;product=Acyl-coenzymeA:ethanol O-acyltransferase that plays a minor role in medium-chain fatty
chr02	0.988489	0.991755	589109	-	ID=NC_001134.7:FZO1:unknown_transcript_1;Parent=NC_001134.7:FZO1;locus_tag=YBR179C;note=Mitochondrial integral membrane protein involved in mitochondrial fusion and maintenance of the mitochondrial genome%3B contains N-terminal GTPase domain;experiment=ex
chr02	0.987132	0.975974	589736	+	ID=NC_001134.7:DTR1:unknown_transcript_1;Parent=NC_001134.7:DTR1;locus_tag=YBR180W;note=Putative dityrosine transporter%2C required for spore wall synthesis%3B expressed during sporulation%3B member of the major facilitator superfamily %28DHA1 family%29 o
chr02	0.757875	0.755827	592769	-	ID=NC_001134.7:RPS6B:unknown_transcript_1;Parent=NC_001134.7:RPS6B;locus_tag=YBR181C;gene_synonym=RPS102;gene_synonym=RPS101;gene_synonym=LPG18;note=Rps6bp;experiment=experimental evidence%2C no additional details recorded;product=Protein component of the
chr02	0.478295	0.706034	594859	-	ID=NC_001134.7:SMP1:unknown_transcript_1;Parent=NC_001134.7:SMP1;locus_tag=YBR182C;note=Smp1p;experiment=experimental evidence%2C no additional details recorded;product=Putative transcription factor involved in regulating the response to osmotic stress%3B
chr02	0.78292	0.507462	595550	-	locus_tag=YBR182C-A;note=Ybr182c-ap;inference=non-experimental evidence%2C no additional details recorded;product=Putative protein of unknown function%3B identified by gene-trapping%2C microarray-based expression analysis%2C and genome-wide homology searc
chr02	0.720478	0.341519	596110	+	ID=NC_001134.7:YPC1:unknown_transcript_1;Parent=NC_001134.7:YPC1;locus_tag=YBR183W;note=Ypc1p;experiment=experimental evidence%2C no additional details recorded;product=Alkaline ceramidase that also has reverse %28CoA-independent%29 ceramide synthase acti
chr02	0.772049	0.9363	597358	+	locus_tag=YBR184W;note=Ybr184wp;inference=non-experimental evidence%2C no additional details recorded;product=Putative protein of unknown function%3B YBR184W is not an essential gene;protein_id=NP_009743.1;db_xref=SGD:S000000388;db_xref=GI:6319661;db_xref
chr02	0.851598	0.863426	599954	-	ID=NC_001134.7:MBA1:unknown_transcript_1;Parent=NC_001134.7:MBA1;locus_tag=YBR185C;note=Protein involved in assembly of mitochondrial respiratory complexes%3B may act as a receptor for proteins destined for export from the mitochondrial matrix to the inne
chr02	0.859477	0.865074	600548	+	ID=NC_001134.7:PCH2:unknown_transcript_1;Parent=NC_001134.7:PCH2;locus_tag=YBR186W;note=Pch2p;experiment=experimental evidence%2C no additional details recorded;product=Nucleolar component of the pachytene checkpoint%2C which prevents chromosome segregati
chr02	0.659122	0.732484	602629	+	ID=NC_001134.7:GDT1:unknown_transcript_1;Parent=NC_001134.7:GDT1;locus_tag=YBR187W;note=Putative protein of unknown function%3B expression is reduced in a gcr1 null mutant%3B GFP-fusion protein localizes to the vacuole%3B expression pattern and physical i
chr02	0.779239	0.756692	604102	-	ID=NC_001134.7:NTC20:unknown_transcript_1;Parent=NC_001134.7:NTC20;locus_tag=YBR188C;note=Ntc20p;experiment=experimental evidence%2C no additional details recorded;product=Member of a complex%2C including Prp19p%2C that binds to the spliceosome%3B require
chr02	0.582716	0.535462	604503	+	ID=NC_001134.7:RPS9B:unknown_transcript_1;Parent=NC_001134.7:RPS9B;locus_tag=YBR189W;gene_synonym=SUP46;gene_synonym=RPS13A;note=Rps9bp;experiment=experimental evidence%2C no additional details recorded;product=Protein component of the small %2840S%29 rib
chr02	0.884909	0.949768	606265	+	ID=NC_001134.7:RPL21A:unknown_transcript_1;Parent=NC_001134.7:RPL21A;locus_tag=YBR191W;gene_synonym=URP1;note=Rpl21ap;experiment=experimental evidence%2C no additional details recorded;product=Protein component of the large %2860S%29 ribosomal subunit%2C
chr02	0.849115	0.821716	607647	+	ID=NC_001134.7:RIM2:unknown_transcript_1;Parent=NC_001134.7:RIM2;locus_tag=YBR192W;gene_synonym=PYT1;note=Rim2p;experiment=experimental evidence%2C no additional details recorded;product=Mitochondrial pyrimidine nucleotide transporter%3B imports pyrimidin
chr02	0.514476	0.922608	609748	-	ID=NC_001134.7:MED8:unknown_transcript_1;Parent=NC_001134.7:MED8;locus_tag=YBR193C;note=Subunit of the RNA polymerase II mediator complex%3B associates with core polymerase subunits to form the RNA polymerase II holoenzyme%3B essential for transcriptional
chr02	0.728145	0.87201	610033	+	ID=NC_001134.7:AIM4:unknown_transcript_1;Parent=NC_001134.7:AIM4;locus_tag=YBR194W;note=Protein proposed to be associated with the nuclear pore complex%3B null mutant displays decreased frequency of mitochondrial genome loss %28petite formation%29 and a s
chr02	0.802308	0.812259	611877	-	ID=NC_001134.7:MSI1:unknown_transcript_1;Parent=NC_001134.7:MSI1;locus_tag=YBR195C;gene_synonym=CAC3;note=Subunit of chromatin assembly factor I %28CAF-1%29%2C negative regulator of the RAS%2FcAMP pathway via sequestration of Npr1p kinase%3B localizes to
chr02	0.855118	0.816941	613895	-	ID=NC_001134.7:PGI1:unknown_transcript_1;Parent=NC_001134.7:PGI1;locus_tag=YBR196C;gene_synonym=CDC30;EC_number=5.3.1.9;note=Pgi1p;experiment=experimental evidence%2C no additional details recorded;product=Glycolytic enzyme phosphoglucose isomerase%2C cat
chr02	0.860145	0.930241	614168	-	locus_tag=YBR196C-A;note=Ybr196c-ap;inference=non-experimental evidence%2C no additional details recorded;product=Putative protein of unknown function%3B identified by fungal homology and RT-PCR;protein_id=NP_878051.1;db_xref=SGD:S000028534;db_xref=GI:334
chr02	0.817782	0.871715	614625	-	locus_tag=YBR196C-B;note=Ybr196c-bp;inference=non-experimental evidence%2C no additional details recorded;product=Putative protein of unknown function%3B identified by expression profiling and mass spectrometry;protein_id=NP_878052.1;db_xref=SGD:S00002881
chr02	0.827125	0.897395	615851	-	locus_tag=YBR197C;note=Ybr197cp;inference=non-experimental evidence%2C no additional details recorded;product=Putative protein of unknown function%3B green fluorescent protein %28GFP%29-fusion protein localizes to the cytoplasm and nucleus%3B YBR197C is n
chr02	0.890187	0.870033	618518	-	ID=NC_001134.7:TAF5:unknown_transcript_1;Parent=NC_001134.7:TAF5;locus_tag=YBR198C;gene_synonym=TAF90;note=Taf5p;experiment=experimental evidence%2C no additional details recorded;product=Subunit %2890 kDa%29 of TFIID and SAGA complexes%2C involved in RNA
chr02	0.763518	0.783946	618904	+	ID=NC_001134.7:KTR4:unknown_transcript_1;Parent=NC_001134.7:KTR4;locus_tag=YBR199W;EC_number=2.4.1.131;note=Putative mannosyltransferase involved in protein glycosylation%3B member of the KRE2%2FMNT1 mannosyltransferase family;experiment=experimental evid
chr02	0.809271	0.940882	620867	+	ID=NC_001134.7:BEM1:unknown_transcript_1;Parent=NC_001134.7:BEM1;locus_tag=YBR200W;gene_synonym=SRO1;note=Protein containing SH3-domains%2C involved in establishing cell polarity and morphogenesis%3B functions as a scaffold protein for complexes that incl
chr02	0.791006	0.815314	622978	+	locus_tag=YBR200W-A;note=Ybr200w-ap;inference=non-experimental evidence%2C no additional details recorded;product=Putative protein of unknown function%3B identified by fungal homology and RT-PCR;protein_id=NP_878053.1;db_xref=SGD:S000028535;db_xref=GI:334
chr02	0.521902	0.951765	623572	+	ID=NC_001134.7:DER1:unknown_transcript_1;Parent=NC_001134.7:DER1;locus_tag=YBR201W;note=Endoplasmic reticulum membrane protein%2C required for ER-associated protein degradation of misfolded or unassembled proteins%3B N- and C- termini protrude into the cy
chr02	0.921119	0.891501	624692	-	locus_tag=YBR201C-A;note=Ybr201c-ap;inference=non-experimental evidence%2C no additional details recorded;product=Putative protein of unknown function;protein_id=NP_001032571.1;db_xref=SGD:S000087085;db_xref=GI:82795240;db_xref=GeneID:3799967;exon_number=
chr02	0.854685	0.84634	625767	+	ID=NC_001134.7:MCM7:unknown_transcript_1;Parent=NC_001134.7:MCM7;locus_tag=YBR202W;gene_synonym=CDC47;note=Mcm7p;experiment=experimental evidence%2C no additional details recorded;product=Component of the hexameric MCM complex%2C which is important for pr
chr02	0.801786	0.882798	629163	+	ID=NC_001134.7:COS111:unknown_transcript_1;Parent=NC_001134.7:COS111;locus_tag=YBR203W;note=Protein required for resistance to the antifungal drug ciclopirox olamine%3B not related to the subtelomerically-encoded COS family%3B the authentic%2C non-tagged
chr02	0.970959	0.978434	633376	-	locus_tag=YBR204C;EC_number=3.1.1.-;note=Ybr204cp;inference=non-experimental evidence%2C no additional details recorded;product=Serine hydrolase%3B YBR204C is not an essential gene;protein_id=NP_009763.1;db_xref=SGD:S000000408;db_xref=GI:6319681;db_xref=G
chr02	0.785494	0.870191	633617	+	ID=NC_001134.7:KTR3:unknown_transcript_1;Parent=NC_001134.7:KTR3;locus_tag=YBR205W;EC_number=2.4.1.131;note=Putative alpha-1%2C2-mannosyltransferase involved in O- and N-linked protein glycosylation%3B member of the KRE2%2FMNT1 mannosyltransferase family;
chr02	0.732481	0.870693	635141	+	ID=NC_001134.7:FTH1:unknown_transcript_1;Parent=NC_001134.7:FTH1;locus_tag=YBR207W;note=Putative high affinity iron transporter involved in transport of intravacuolar stores of iron%3B forms complex with Fet5p%3B expression is regulated by iron%3B propose
chr02	0.760693	0.925358	642205	-	ID=NC_001134.7:DUR1%2C2:unknown_transcript_1;Parent=NC_001134.7:DUR1%2C2;locus_tag=YBR208C;gene_synonym=DUR80;EC_number=3.5.1.54;note=Urea amidolyase%2C contains both urea carboxylase and allophanate hydrolase activities%2C degrades urea to CO2 and NH3%3B
chr02	0.666295	0.919539	645545	+	ID=NC_001134.7:ERV15:unknown_transcript_1;Parent=NC_001134.7:ERV15;locus_tag=YBR210W;note=Protein involved in export of proteins from the endoplasmic reticulum%2C has similarity to Erv14p;experiment=experimental evidence%2C no additional details recorded;
chr02	0.536942	0.64257	647127	-	ID=NC_001134.7:AME1:unknown_transcript_1;Parent=NC_001134.7:AME1;locus_tag=YBR211C;gene_synonym=ARP100;note=Essential kinetochore protein associated with microtubules and spindle pole bodies%3B component of the kinetochore sub-complex COMA %28Ctf19p%2C Ok
chr02	0.817526	0.920076	647881	+	ID=NC_001134.7:NGR1:unknown_transcript_1;Parent=NC_001134.7:NGR1;locus_tag=YBR212W;gene_synonym=RBP1;note=RNA binding protein that negatively regulates growth rate%3B interacts with the 3%27 UTR of the mitochondrial porin %28POR1%29 mRNA and enhances its
chr02	0.858029	0.936815	650363	+	ID=NC_001134.7:MET8:unknown_transcript_1;Parent=NC_001134.7:MET8;locus_tag=YBR213W;note=Met8p;experiment=experimental evidence%2C no additional details recorded;product=Bifunctional dehydrogenase and ferrochelatase%2C involved in the biosynthesis of siroh
chr02	0.804725	0.745259	651410	+	ID=NC_001134.7:SDS24:unknown_transcript_1;Parent=NC_001134.7:SDS24;locus_tag=YBR214W;note=Sds24p;experiment=experimental evidence%2C no additional details recorded;product=One of two S. cerevisiae homologs %28Sds23p and Sds24p%29 of the Schizosaccharomyce
chr02	0.804752	0.944849	653351	+	ID=NC_001134.7:HPC2:unknown_transcript_1;Parent=NC_001134.7:HPC2;locus_tag=YBR215W;note=Hpc2p;experiment=experimental evidence%2C no additional details recorded;product=Highly charged%2C basic protein required for normal cell-cycle regulation of histone g
chr02	0.913297	0.895221	657595	-	ID=NC_001134.7:YBP1:unknown_transcript_1;Parent=NC_001134.7:YBP1;locus_tag=YBR216C;note=Ybp1p;experiment=experimental evidence%2C no additional details recorded;product=Protein required for oxidation of specific cysteine residues of the transcription fact
chr02	0.888279	0.939839	657827	+	ID=NC_001134.7:ATG12:unknown_transcript_1;Parent=NC_001134.7:ATG12;locus_tag=YBR217W;gene_synonym=APG12;note=Ubiquitin-like modifier%2C conjugated via an isopeptide bond to a lysine residue of Atg5p by the E1 enzyme%2C Atg7p%2C and the E2 enzyme%2C Atg10p
chr02	0.552754	0.860611	662244	-	ID=NC_001134.7:PYC2:unknown_transcript_1;Parent=NC_001134.7:PYC2;locus_tag=YBR218C;EC_number=6.4.1.1;note=Pyruvate carboxylase isoform%2C cytoplasmic enzyme that converts pyruvate to oxaloacetate%3B highly similar to isoform Pyc1p but differentially regul
chr02	0.779449	0.79967	663298	-	locus_tag=YBR219C;note=Ybr219cp;inference=non-experimental evidence%2C no additional details recorded;product=Putative protein of unknown function%3B YBR219C is not an essential gene;protein_id=NP_009778.1;db_xref=SGD:S000000423;db_xref=GI:6319696;db_xref
chr02	0.832197	0.9538	664672	-	locus_tag=YBR220C;note=Ybr220cp;inference=non-experimental evidence%2C no additional details recorded;product=Putative protein of unknown function%3B YBR220C is not an essential gene;protein_id=NP_009779.1;db_xref=SGD:S000000424;db_xref=GI:6319697;db_xref
chr02	0.877685	0.945323	666248	-	ID=NC_001134.7:PDB1:unknown_transcript_1;Parent=NC_001134.7:PDB1;locus_tag=YBR221C;EC_number=1.2.4.1;note=Pdb1p;experiment=experimental evidence%2C no additional details recorded;product=E1 beta subunit of the pyruvate dehydrogenase %28PDH%29 complex%2C w
chr02	0.511376	0.711896	666533	+	locus_tag=YBR221W-A;note=Ybr221w-ap;inference=non-experimental evidence%2C no additional details recorded;product=Putative protein of unknown function%3B identified by expression profiling and mass spectrometry;protein_id=NP_878054.1;db_xref=SGD:S00002881
chr02	0.877012	0.931797	668346	-	ID=NC_001134.7:PCS60:unknown_transcript_1;Parent=NC_001134.7:PCS60;locus_tag=YBR222C;gene_synonym=FAT2;EC_number=6.-.-.-;note=Peroxisomal AMP-binding protein%2C localizes to both the peroxisomal peripheral membrane and matrix%2C expression is highly induc
chr02	0.777521	0.934278	670292	-	ID=NC_001134.7:TDP1:unknown_transcript_1;Parent=NC_001134.7:TDP1;locus_tag=YBR223C;note=Tyrosyl-DNA Phosphodiesterase I%2C hydrolyzes 3%27-phosphotyrosyl bonds to generate 3%27-phosphate DNA and tyrosine%2C involved in the repair of DNA lesions created by
chr02	0.907185	0.980215	670622	+	locus_tag=YBR225W;note=Ybr225wp;inference=non-experimental evidence%2C no additional details recorded;product=Putative protein of unknown function%3B non-essential gene identified in a screen for mutants affected in mannosylphophorylation of cell wall com
chr02	0.9152	0.780624	675129	-	ID=NC_001134.7:MCX1:unknown_transcript_1;Parent=NC_001134.7:MCX1;locus_tag=YBR227C;note=Mitochondrial ATP-binding protein%2C possibly a mitochondrial chaperone with non-proteolytic function%3B similar to bacterial ClpX proteins;experiment=experimental evi
chr02	0.784199	0.841984	675308	+	ID=NC_001134.7:SLX1:unknown_transcript_1;Parent=NC_001134.7:SLX1;locus_tag=YBR228W;note=Subunit of a complex%2C with Slx4p%2C that hydrolyzes 5%27 branches from duplex DNA in response to stalled or converging replication forks%3B function overlaps with th
chr02	0.878163	0.944363	679216	-	ID=NC_001134.7:ROT2:unknown_transcript_1;Parent=NC_001134.7:ROT2;locus_tag=YBR229C;gene_synonym=GLS2;EC_number=3.2.1.-;note=Rot2p;experiment=experimental evidence%2C no additional details recorded;product=Glucosidase II catalytic subunit required for norm
chr02	0.915819	0.91875	680045	-	ID=NC_001134.7:OM14:unknown_transcript_1;Parent=NC_001134.7:OM14;locus_tag=YBR230C;note=Om14p;experiment=experimental evidence%2C no additional details recorded;product=Integral mitochondrial outer membrane protein%3B abundance is decreased in cells grown
chr02	0.901116	0.950201	680357	+	locus_tag=YBR230W-A;note=Ybr230w-ap;inference=non-experimental evidence%2C no additional details recorded;product=Putative protein of unknown function;protein_id=NP_001018029.1;db_xref=SGD:S000029722;db_xref=GI:63148619;db_xref=GeneID:2777172;exon_number=
chr02	0.802251	0.860888	683085	-	ID=NC_001134.7:SWC5:unknown_transcript_1;Parent=NC_001134.7:SWC5;locus_tag=YBR231C;gene_synonym=AOR1;note=Swc5p;experiment=experimental evidence%2C no additional details recorded;product=Protein of unknown function%2C component of the SWR1 complex%2C whic
chr02	0.821261	0.610521	683423	+	ID=NC_001134.7:PBP2:unknown_transcript_1;Parent=NC_001134.7:PBP2;locus_tag=YBR233W;gene_synonym=HEK1;note=RNA binding protein with similarity to mammalian heterogeneous nuclear RNP K protein%2C involved in the regulation of telomere position effect and te
chr02	0.89122	0.814207	684972	+	ID=NC_001134.7:DAD3:unknown_transcript_1;Parent=NC_001134.7:DAD3;locus_tag=YBR233W-A;note=Essential subunit of the Dam1 complex %28aka DASH complex%29%2C couples kinetochores to the force produced by MT depolymerization thereby aiding in chromosome segreg
chr02	0.899862	0.776614	686587	-	ID=NC_001134.7:ARC40:unknown_transcript_1;Parent=NC_001134.7:ARC40;locus_tag=YBR234C;note=Subunit of the ARP2%2F3 complex%2C which is required for the motility and integrity of cortical actin patches;experiment=experimental evidence%2C no additional detai
chr02	0.742654	0.882203	686896	+	locus_tag=YBR235W;note=Ybr235wp;inference=non-experimental evidence%2C no additional details recorded;product=Putative ion transporter%2C similar to mammalian electroneutral Na%28%2B%29-%28K%2B%29-C1- cotransporter family%3B YBR235W is not an essential ge
chr02	0.824465	0.760908	691688	-	ID=NC_001134.7:ABD1:unknown_transcript_1;Parent=NC_001134.7:ABD1;locus_tag=YBR236C;note=Methyltransferase%2C catalyzes the transfer of a methyl group from S-adenosylmethionine to the GpppN terminus of capped mRNA;experiment=experimental evidence%2C no add
chr02	0.872607	0.948063	691964	+	ID=NC_001134.7:PRP5:unknown_transcript_1;Parent=NC_001134.7:PRP5;locus_tag=YBR237W;gene_synonym=RNA5;note=RNA helicase in the DEAD-box family%2C necessary for prespliceosome formation%2C bridges U1 and U2 snRNPs and enables stable U2 snRNP association wit
chr02	0.83579	0.76916	697297	-	locus_tag=YBR238C;note=Ybr238cp;inference=non-experimental evidence%2C no additional details recorded;product=Mitochondrial membrane protein with similarity to Rmd9p%3B not required for respiratory growth but causes a synthetic respiratory defect in combi
chr02	0.851428	0.95956	699938	-	locus_tag=YBR239C;note=Ybr239cp;inference=non-experimental evidence%2C no additional details recorded;product=Putative protein of unknown function%3B green fluorescent protein %28GFP%29-fusion protein localizes to the cytoplasm and nucleus%3B YBR239C is n
chr02	0.739585	0.914077	701837	-	ID=NC_001134.7:THI2:unknown_transcript_1;Parent=NC_001134.7:THI2;locus_tag=YBR240C;gene_synonym=PHO6;note=Zinc finger protein of the Zn%28II%292Cys6 type%2C probable transcriptional activator of thiamine biosynthetic genes;experiment=experimental evidence
chr02	0.838371	0.805005	704050	-	locus_tag=YBR241C;note=Ybr241cp;inference=non-experimental evidence%2C no additional details recorded;product=Putative transporter%2C member of the sugar porter family%3B green fluorescent protein %28GFP%29-fusion protein localizes to the vacuolar membran
chr02	0.905397	0.893803	704665	+	locus_tag=YBR242W;note=Ybr242wp;inference=non-experimental evidence%2C no additional details recorded;product=Putative protein of unknown function%3B green fluorescent protein %28GFP%29-fusion protein localizes to the cytoplasm and nucleus%3B YBR242W is n
chr02	0.972253	0.961252	706788	-	ID=NC_001134.7:ALG7:unknown_transcript_1;Parent=NC_001134.7:ALG7;locus_tag=YBR243C;gene_synonym=TUR1;EC_number=2.7.8.15;note=UDP-N-acetyl-glucosamine-1-P transferase%2C transfers Glc-Nac-P from UDP-GlcNac to Dol-P in the ER in the first step of the dolich
chr02	0.974202	0.992702	707523	+	ID=NC_001134.7:GPX2:unknown_transcript_1;Parent=NC_001134.7:GPX2;locus_tag=YBR244W;gene_synonym=AMI1;EC_number=1.11.1.9;note=Phospholipid hydroperoxide glutathione peroxidase induced by glucose starvation that protects cells from phospholipid hydroperoxid
chr02	0.944269	0.81985	711534	-	ID=NC_001134.7:ISW1:unknown_transcript_1;Parent=NC_001134.7:ISW1;locus_tag=YBR245C;gene_synonym=SGN2;note=Member of the imitation-switch %28ISWI%29 class of ATP-dependent chromatin remodeling complexes%3B ATPase that forms a complex with Ioc2p and Ioc4p t
chr02	0.671193	0.863414	711586	+	locus_tag=YBR246W;note=Ybr246wp;inference=non-experimental evidence%2C no additional details recorded;product=Putative protein of unknown function%3B deletion results in a weak carboxypeptidase Y missorting%2Fsecretion phenotype%3B YBR246W is not an essen
chr02	0.869432	0.937714	714450	-	ID=NC_001134.7:ENP1:unknown_transcript_1;Parent=NC_001134.7:ENP1;locus_tag=YBR247C;gene_synonym=MEG1;note=Protein associated with U3 and U14 snoRNAs%2C required for pre-rRNA processing and 40S ribosomal subunit synthesis%3B localized in the nucleus and co
chr02	0.906817	0.936387	716460	-	ID=NC_001134.7:HIS7:unknown_transcript_1;Parent=NC_001134.7:HIS7;locus_tag=YBR248C;EC_number=2.4.2.-;note=Imidazole glycerol phosphate synthase %28glutamine amidotransferase:cyclase%29%2C catalyzes the fifth and sixth steps of histidine biosynthesis and a
chr02	0.955743	0.976102	717989	-	ID=NC_001134.7:ARO4:unknown_transcript_1;Parent=NC_001134.7:ARO4;locus_tag=YBR249C;EC_number=2.5.1.54;note=Aro4p;experiment=experimental evidence%2C no additional details recorded;product=3-deoxy-D-arabino-heptulosonate-7-phosphate %28DAHP%29 synthase%2C
chr02	0.954149	0.976352	719028	+	ID=NC_001134.7:SPO23:unknown_transcript_1;Parent=NC_001134.7:SPO23;locus_tag=YBR250W;note=Spo23p;experiment=experimental evidence%2C no additional details recorded;product=Protein of unknown function%3B associates with meiosis-specific protein Spo1p;prote
chr02	0.962733	0.96112	721385	+	ID=NC_001134.7:MRPS5:unknown_transcript_1;Parent=NC_001134.7:MRPS5;locus_tag=YBR251W;note=Mrps5p;experiment=experimental evidence%2C no additional details recorded;product=Mitochondrial ribosomal protein of the small subunit;protein_id=NP_009810.1;db_xref
chr02	0.787457	0.832731	722606	+	ID=NC_001134.7:DUT1:unknown_transcript_1;Parent=NC_001134.7:DUT1;locus_tag=YBR252W;EC_number=3.6.1.23;note=dUTPase%2C catalyzes hydrolysis of dUTP to dUMP and PPi%2C thereby preventing incorporation of uracil into DNA during replication%3B critical for th
chr02	0.911156	0.973886	723265	+	ID=NC_001134.7:SRB6:unknown_transcript_1;Parent=NC_001134.7:SRB6;locus_tag=YBR253W;gene_synonym=MED22;note=Subunit of the RNA polymerase II mediator complex%3B associates with core polymerase subunits to form the RNA polymerase II holoenzyme%3B essential
chr02	0.522108	0.745695	724258	-	ID=NC_001134.7:TRS20:unknown_transcript_1;Parent=NC_001134.7:TRS20;locus_tag=YBR254C;note=Trs20p;experiment=experimental evidence%2C no additional details recorded;product=One of 10 subunits of the transport protein particle %28TRAPP%29 complex of the cis
chr02	0.932158	0.935965	724451	+	locus_tag=YBR255W;note=Ybr255wp;inference=non-experimental evidence%2C no additional details recorded;product=Protein of unknown function%2C required for normal growth rate at 15 degrees C%3B green fluorescent protein %28GFP%29-fusion protein localizes to
chr02	0.74181	0.922647	727069	-	locus_tag=YBR255C-A;note=Ybr255c-ap;inference=non-experimental evidence%2C no additional details recorded;product=Putative protein of unknown function%3B identified by sequence comparison with hemiascomycetous yeast species;protein_id=NP_116328.2;db_xref=
chr02	0.787075	0.905637	728097	-	ID=NC_001134.7:RIB5:unknown_transcript_1;Parent=NC_001134.7:RIB5;locus_tag=YBR256C;EC_number=2.5.1.9;note=Riboflavin synthase%3B catalyzes the last step of the riboflavin biosynthesis pathway;experiment=experimental evidence%2C no additional details recor
chr02	0.928204	0.948985	728880	+	ID=NC_001134.7:POP4:unknown_transcript_1;Parent=NC_001134.7:POP4;locus_tag=YBR257W;note=Subunit of both RNase MRP%2C which cleaves pre-rRNA%2C and nuclear RNase P%2C which cleaves tRNA precursors to generate mature 5%27 ends%3B binds to the RPR1 RNA subun
chr02	0.966602	0.955156	730157	-	ID=NC_001134.7:SHG1:unknown_transcript_1;Parent=NC_001134.7:SHG1;locus_tag=YBR258C;gene_synonym=CPS15;note=Subunit of the COMPASS %28Set1C%29 complex%2C which methylates histone H3 on lysine 4 and is required in transcriptional silencing near telomeres;ex
chr02	0.867646	0.878739	730382	+	locus_tag=YBR259W;note=Ybr259wp;inference=non-experimental evidence%2C no additional details recorded;product=Putative protein of unknown function%3B YBR259W is not an essential gene;protein_id=NP_009818.1;db_xref=SGD:S000000463;db_xref=GI:6319736;db_xref
chr02	0.969346	0.970918	734634	-	ID=NC_001134.7:RGD1:unknown_transcript_1;Parent=NC_001134.7:RGD1;locus_tag=YBR260C;note=Rgd1p;experiment=experimental evidence%2C no additional details recorded;product=GTPase-activating protein %28RhoGAP%29 for Rho3p and Rho4p%2C possibly involved in con
chr02	0.943887	0.916226	735525	-	locus_tag=YBR261C;note=Ybr261cp;inference=non-experimental evidence%2C no additional details recorded;product=Putative S-adenosylmethionine-dependent methyltransferase of the seven beta-strand family%3B green fluorescent protein %28GFP%29-fusion protein l
chr02	0.761016	0.890164	736035	-	ID=NC_001134.7:AIM5:unknown_transcript_1;Parent=NC_001134.7:AIM5;locus_tag=YBR262C;note=Protein of unknown function%3B non-tagged protein is detected in purified mitochondria in high-throughput studies%3B null mutant displays decreased frequency of mitoch
chr02	0.973503	0.944423	736259	+	ID=NC_001134.7:SHM1:unknown_transcript_1;Parent=NC_001134.7:SHM1;locus_tag=YBR263W;gene_synonym=TMP3;gene_synonym=SHMT1;EC_number=2.1.2.1;note=Shm1p;experiment=experimental evidence%2C no additional details recorded;product=Mitochondrial serine hydroxymet
chr02	0.750845	0.920703	738364	-	ID=NC_001134.7:YPT10:unknown_transcript_1;Parent=NC_001134.7:YPT10;locus_tag=YBR264C;note=Ypt10p;experiment=experimental evidence%2C no additional details recorded;product=GTP binding protein that contains the PEST signal sequence specific for proteolytic
chr02	0.75033	0.909967	738577	+	ID=NC_001134.7:TSC10:unknown_transcript_1;Parent=NC_001134.7:TSC10;locus_tag=YBR265W;note=Tsc10p;experiment=experimental evidence%2C no additional details recorded;product=3-ketosphinganine reductase%2C catalyzes the second step in phytosphingosine synthe
chr02	0.750578	0.890064	739836	+	ID=NC_001134.7:REI1:unknown_transcript_1;Parent=NC_001134.7:REI1;locus_tag=YBR267W;note=Rei1p;experiment=experimental evidence%2C no additional details recorded;product=Cytoplasmic pre-60S factor%3B required for the correct recycling of shuttling factors
chr02	0.966494	0.874219	741294	+	ID=NC_001134.7:MRPL37:unknown_transcript_1;Parent=NC_001134.7:MRPL37;locus_tag=YBR268W;note=Mrpl37p;experiment=experimental evidence%2C no additional details recorded;product=Mitochondrial ribosomal protein of the large subunit;protein_id=NP_009827.1;db_x
chr02	0.920681	0.968169	742571	-	ID=NC_001134.7:FMP21:unknown_transcript_1;Parent=NC_001134.7:FMP21;locus_tag=YBR269C;note=Putative protein of unknown function%3B the authentic%2C non-tagged protein is detected in highly purified mitochondria in high-throughput studies;experiment=experim
chr02	0.897065	0.973723	744393	-	ID=NC_001134.7:BIT2:unknown_transcript_1;Parent=NC_001134.7:BIT2;locus_tag=YBR270C;experiment=experimental evidence%2C no additional details recorded;product=Bit2p;protein_id=NP_009829.1;db_xref=SGD:S000000474;db_xref=GI:6319747;db_xref=GeneID:852573;exon
chr02	0.924326	0.94809	744847	+	locus_tag=YBR271W;note=Ybr271wp;inference=non-experimental evidence%2C no additional details recorded;product=Putative S-adenosylmethionine-dependent methyltransferase of the seven beta-strand family%3B green fluorescent protein %28GFP%29-fusion protein l
chr02	0.84967	0.860553	747798	-	ID=NC_001134.7:HSM3:unknown_transcript_1;Parent=NC_001134.7:HSM3;locus_tag=YBR272C;note=Protein of unknown function%2C involved in DNA mismatch repair during slow growth%3B has weak similarity to Msh1p;experiment=experimental evidence%2C no additional det
chr02	0.926526	0.955579	749366	-	ID=NC_001134.7:UBX7:unknown_transcript_1;Parent=NC_001134.7:UBX7;locus_tag=YBR273C;gene_synonym=CUI3;note=Ubx7p;experiment=experimental evidence%2C no additional details recorded;product=UBX %28ubiquitin regulatory X%29 domain-containing protein that inte
chr02	0.798536	0.871919	749589	+	ID=NC_001134.7:CHK1:unknown_transcript_1;Parent=NC_001134.7:CHK1;locus_tag=YBR274W;EC_number=2.7.1.-;note=Serine%2Fthreonine kinase and DNA damage checkpoint effector%2C mediates cell cycle arrest via phosphorylation of Pds1p%3B phosphorylated by checkpoi
chr02	0.848528	0.862256	757101	-	ID=NC_001134.7:RIF1:unknown_transcript_1;Parent=NC_001134.7:RIF1;locus_tag=YBR275C;note=Rif1p;experiment=experimental evidence%2C no additional details recorded;product=Protein that binds to the Rap1p C-terminus and acts synergistically with Rif2p to help
chr02	0.941418	0.919953	760039	-	ID=NC_001134.7:PPS1:unknown_transcript_1;Parent=NC_001134.7:PPS1;locus_tag=YBR276C;EC_number=3.1.3.48;note=Protein phosphatase with specificity for serine%2C threonine%2C and tyrosine residues%3B has a role in the DNA synthesis phase of the cell cycle;exp
chr02	0.670208	0.84441	760290	+	ID=NC_001134.7:DPB3:unknown_transcript_1;Parent=NC_001134.7:DPB3;locus_tag=YBR278W;EC_number=2.7.7.7;note=Third-largest subunit of DNA polymerase II %28DNA polymerase epsilon%29%2C required to maintain fidelity of chromosomal replication and also for inhe
chr02	0.956081	0.964627	761253	+	ID=NC_001134.7:PAF1:unknown_transcript_1;Parent=NC_001134.7:PAF1;locus_tag=YBR279W;note=RNAP II-associated protein%3B defines large complex biochemically and functionally distinct from the Srb-Mediator form of Pol II holoenzyme%3B required for full expres
chr02	0.878457	0.825428	764693	-	ID=NC_001134.7:SAF1:unknown_transcript_1;Parent=NC_001134.7:SAF1;locus_tag=YBR280C;note=Saf1p;experiment=experimental evidence%2C no additional details recorded;product=F-Box protein involved in proteasome-dependent degradation of Aah1p during entry of ce
chr02	0.89728	0.864223	767602	-	ID=NC_001134.7:DUG2:unknown_transcript_1;Parent=NC_001134.7:DUG2;locus_tag=YBR281C;note=Probable di- and tri-peptidase%3B forms a complex with Dug1p and Dug3p to degrade glutathione %28GSH%29 and other peptides containing a gamma-glu-X bond in an alternat
chr02	0.539956	0.904	768236	+	ID=NC_001134.7:MRPL27:unknown_transcript_1;Parent=NC_001134.7:MRPL27;locus_tag=YBR282W;note=Mrpl27p;experiment=experimental evidence%2C no additional details recorded;product=Mitochondrial ribosomal protein of the large subunit;protein_id=NP_009841.1;db_x
chr02	0.53791	0.642047	770411	-	ID=NC_001134.7:SSH1:unknown_transcript_1;Parent=NC_001134.7:SSH1;locus_tag=YBR283C;note=Subunit of the Ssh1 translocon complex%3B Sec61p homolog involved in co-translational pathway of protein translocation%3B not essential;experiment=experimental evidenc
chr02	0.291608	0.503839	771235	+	locus_tag=YBR284W;note=Ybr284wp;inference=non-experimental evidence%2C no additional details recorded;product=Putative protein of unknown function%3B YBR284W is not an essential gene%3B null mutant exhibits decreased resistance to rapamycin and wortmannin
chr02	0.752429	0.947207	773918	+	locus_tag=YBR285W;note=Ybr285wp;inference=non-experimental evidence%2C no additional details recorded;product=Putative protein of unknown function%3B YBR285W is not an essential gene and deletion of YBR285W leads to poor growth on glucose-minimal medium a
chr02	0.902939	0.938304	774696	+	ID=NC_001134.7:APE3:unknown_transcript_1;Parent=NC_001134.7:APE3;locus_tag=YBR286W;gene_synonym=APY1;EC_number=3.4.11.-;note=Vacuolar aminopeptidase Y%2C processed to mature form by Prb1p;experiment=experimental evidence%2C no additional details recorded;
chr02	0.944683	0.893643	776567	+	locus_tag=YBR287W;note=Ybr287wp;inference=non-experimental evidence%2C no additional details recorded;product=Protein of unknown function%3B green fluorescent protein %28GFP%29-fusion protein localizes to the ER%3B YBR287W is not an essential gene;protein
chr02	0.725064	0.747038	779459	-	ID=NC_001134.7:APM3:unknown_transcript_1;Parent=NC_001134.7:APM3;locus_tag=YBR288C;gene_synonym=YKS6;note=Mu3-like subunit of the clathrin associated protein complex %28AP-3%29%3B functions in transport of alkaline phosphatase to the vacuole via the alter
chr02	0.769362	0.669622	779663	+	ID=NC_001134.7:SNF5:unknown_transcript_1;Parent=NC_001134.7:SNF5;locus_tag=YBR289W;gene_synonym=TYE4;gene_synonym=SWI10;gene_synonym=HAF4;note=Subunit of the SWI%2FSNF chromatin remodeling complex involved in transcriptional regulation%3B functions interd
chr02	0.981587	0.967936	782587	+	ID=NC_001134.7:BSD2:unknown_transcript_1;Parent=NC_001134.7:BSD2;locus_tag=YBR290W;note=Heavy metal ion homeostasis protein%2C facilitates trafficking of Smf1p and Smf2p metal transporters to the vacuole where they are degraded%2C controls metal ion trans
chr02	0.869821	0.904702	784568	-	ID=NC_001134.7:CTP1:unknown_transcript_1;Parent=NC_001134.7:CTP1;locus_tag=YBR291C;note=Mitochondrial inner membrane citrate transporter%2C member of the mitochondrial carrier family;experiment=experimental evidence%2C no additional details recorded;produ
chr02	0.895958	0.927947	787001	+	ID=NC_001134.7:VBA2:unknown_transcript_1;Parent=NC_001134.7:VBA2;locus_tag=YBR293W;note=Vba2p;experiment=experimental evidence%2C no additional details recorded;product=Permease of basic amino acids in the vacuolar membrane;protein_id=NP_009852.1;db_xref=
chr02	0.58517	0.926936	789230	+	ID=NC_001134.7:SUL1:unknown_transcript_1;Parent=NC_001134.7:SUL1;locus_tag=YBR294W;gene_synonym=SFP2;note=Sul1p;experiment=experimental evidence%2C no additional details recorded;product=High affinity sulfate permease%3B sulfate uptake is mediated by spec
chr02	0.57993	0.960936	792843	+	ID=NC_001134.7:PCA1:unknown_transcript_1;Parent=NC_001134.7:PCA1;locus_tag=YBR295W;gene_synonym=PAY2;gene_synonym=CAD2;EC_number=3.6.3.10;note=Pca1p;experiment=experimental evidence%2C no additional details recorded;product=Cadmium transporting P-type ATP
chr02	0.754767	0.929621	798516	-	ID=NC_001134.7:PHO89:unknown_transcript_1;Parent=NC_001134.7:PHO89;locus_tag=YBR296C;gene_synonym=ITN1;note=Pho89p;experiment=experimental evidence%2C no additional details recorded;product=Na%2B%2FPi cotransporter%2C active in early growth phase%3B simil
chr02	0.707917	0.858871	800236	-	locus_tag=YBR296C-A;note=Ybr296c-ap;inference=non-experimental evidence%2C no additional details recorded;product=Putative protein of unknown function%3B identified by gene-trapping%2C microarray-based expression analysis%2C and genome-wide homology searc
chr02	0.523968	0.628604	800517	+	ID=NC_001134.7:MAL33:unknown_transcript_1;Parent=NC_001134.7:MAL33;locus_tag=YBR297W;note=Mal33p;experiment=experimental evidence%2C no additional details recorded;product=MAL-activator protein%2C part of complex locus MAL3%3B nonfunctional in genomic ref
chr02	0.873514	0.881997	804469	-	ID=NC_001134.7:MAL31:unknown_transcript_1;Parent=NC_001134.7:MAL31;locus_tag=YBR298C;note=Maltose permease%2C high-affinity maltose transporter %28alpha-glucoside transporter%29%3B encoded in the MAL3 complex locus%3B member of the 12 transmembrane domain
chr02	0.714159	0.883404	805250	-	locus_tag=YBR298C-A;note=Ybr298c-ap;inference=non-experimental evidence%2C no additional details recorded;product=Putative protein of unknown function%3B identified by gene-trapping%2C microarray-based expression analysis%2C and genome-wide homology searc
chr02	0.861834	0.886104	805345	+	ID=NC_001134.7:MAL32:unknown_transcript_1;Parent=NC_001134.7:MAL32;locus_tag=YBR299W;EC_number=3.2.1.20;note=Maltase %28alpha-D-glucosidase%29%2C inducible protein involved in maltose catabolism%3B encoded in the MAL3 complex locus%3B functional in genomi
chr02	0.892003	0.860627	809051	+	ID=NC_001134.7:DAN3:unknown_transcript_1;Parent=NC_001134.7:DAN3;locus_tag=YBR301W;note=Dan3p;experiment=experimental evidence%2C no additional details recorded;product=Cell wall mannoprotein with similarity to Tir1p%2C Tir2p%2C Tir3p%2C and Tir4p%3B expr
chr02	NA	NA	811473	-	ID=NC_001134.7:COS2:unknown_transcript_1;Parent=NC_001134.7:COS2;locus_tag=YBR302C;note=Protein of unknown function%2C member of the DUP380 subfamily of conserved%2C often subtelomerically-encoded proteins;experiment=experimental evidence%2C no additional
chr03	0.919099	0.92519	8326	-	locus_tag=YCL073C;note=Ycl073cp;inference=non-experimental evidence%2C no additional details recorded;product=Protein of unconfirmed function%3B displays a topology characteristic of the Major Facilitators Superfamily of membrane proteins%3B coding sequen
chr03	0.914264	0.953818	9706	+	ID=NC_001135.4:VBA3:unknown_transcript_1;Parent=NC_001135.4:VBA3;locus_tag=YCL069W;note=Vba3p;experiment=experimental evidence%2C no additional details recorded;product=Permease of basic amino acids in the vacuolar membrane;protein_id=NP_009864.1;db_xref=
chr03	NA	NA	12285	-	locus_tag=YCL068C;note=Ycl068cp;inference=non-experimental evidence%2C no additional details recorded;product=Putative protein of unknown function;protein_id=NP_009865.2;db_xref=SGD:S000000573;db_xref=GI:10383751;db_xref=GeneID:850291;exon_number=1
chr03	NA	NA	13018	-	ID=NC_001135.4:HMLALPHA2:unknown_transcript_1;Parent=NC_001135.4:HMLALPHA2;locus_tag=YCL067C;gene_synonym=ALPHA2;note=Silenced copy of ALPHA2 at HML%3B homeobox-domain protein that associates with Mcm1p in haploid cells to repress a-specific gene expressi
chr03	NA	NA	13282	+	ID=NC_001135.4:HMLALPHA1:unknown_transcript_1;Parent=NC_001135.4:HMLALPHA1;locus_tag=YCL066W;gene_synonym=ALPHA1;note=Silenced copy of ALPHA1 at HML%2C encoding a transcriptional coactivator involved in the regulation of mating-type alpha-specific gene ex
chr03	0.957151	0.952705	16880	-	ID=NC_001135.4:CHA1:unknown_transcript_1;Parent=NC_001135.4:CHA1;locus_tag=YCL064C;EC_number=4.3.1.19;note=Cha1p;experiment=experimental evidence%2C no additional details recorded;product=Catabolic L-serine %28L-threonine%29 deaminase%2C catalyzes the deg
chr03	0.589163	0.606178	17290	+	ID=NC_001135.4:VAC17:unknown_transcript_1;Parent=NC_001135.4:VAC17;locus_tag=YCL063W;gene_synonym=YCL062W;note=Vac17p;experiment=experimental evidence%2C no additional details recorded;product=Protein involved in vacuole inheritance%3B acts as a vacuole-s
chr03	0.941488	0.859819	22106	-	ID=NC_001135.4:MRC1:unknown_transcript_1;Parent=NC_001135.4:MRC1;locus_tag=YCL061C;gene_synonym=YCL060C;note=S-phase checkpoint protein found at replication forks%2C required for DNA replication%3B also required for Rad53p activation during DNA replicatio
chr03	0.843888	0.878809	23379	-	ID=NC_001135.4:KRR1:unknown_transcript_1;Parent=NC_001135.4:KRR1;locus_tag=YCL059C;note=Krr1p;experiment=experimental evidence%2C no additional details recorded;product=Essential nucleolar protein required for the synthesis of 18S rRNA and for the assembl
chr03	0.969895	0.992395	23584	+	locus_tag=YCL058W-A;note=Ycl058w-ap;inference=non-experimental evidence%2C no additional details recorded;product=Protein of unknown function%3B identified by homology to Ashbya gossypii;protein_id=NP_001018031.2;db_xref=SGD:S000028518;db_xref=GI:85666112
chr03	0.990886	0.987171	24325	-	locus_tag=YCL057C-A;note=Ycl057c-ap;inference=non-experimental evidence%2C no additional details recorded;product=Putative protein of unknown function%3B the authentic%2C non-tagged protein is detected in highly purified mitochondria in high-throughput st
chr03	0.963062	0.961805	24768	+	ID=NC_001135.4:PRD1:unknown_transcript_1;Parent=NC_001135.4:PRD1;locus_tag=YCL057W;EC_number=3.4.24.37;note=Zinc metalloendopeptidase%2C found in the cytoplasm and intermembrane space of mitochondria%3B with Cym1p%2C involved in degradation of mitochondri
chr03	0.811605	0.929286	27359	-	locus_tag=YCL056C;note=Ycl056cp;inference=non-experimental evidence%2C no additional details recorded;product=Protein of unknown function%3B green fluorescent protein %28GFP%29-fusion protein localizes to the cytoplasm in a punctate pattern;protein_id=NP_
chr03	0.850214	0.963631	27929	+	ID=NC_001135.4:KAR4:unknown_transcript_1;Parent=NC_001135.4:KAR4;locus_tag=YCL055W;note=Transcription factor required for gene regulation in repsonse to pheromones%3B also required during meiosis%3B exists in two forms%2C a slower-migrating form more abun
chr03	0.807386	0.91843	31449	+	ID=NC_001135.4:SPB1:unknown_transcript_1;Parent=NC_001135.4:SPB1;locus_tag=YCL054W;note=Spb1p;experiment=experimental evidence%2C no additional details recorded;product=AdoMet-dependent methyltransferase involved in rRNA processing and 60S ribosomal subun
chr03	0.940636	0.849001	35393	-	ID=NC_001135.4:PBN1:unknown_transcript_1;Parent=NC_001135.4:PBN1;locus_tag=YCL052C;note=Pbn1p;experiment=experimental evidence%2C no additional details recorded;product=Essential component of glycosylphosphatidylinositol-mannosyltransferase I%2C required
chr03	0.796162	0.795997	35865	+	ID=NC_001135.4:LRE1:unknown_transcript_1;Parent=NC_001135.4:LRE1;locus_tag=YCL051W;note=Protein involved in control of cell wall structure and stress response%3B inhibits Cbk1p protein kinase activity%3B overproduction confers resistance to cell-wall degr
chr03	0.860916	0.935732	38801	-	ID=NC_001135.4:APA1:unknown_transcript_1;Parent=NC_001135.4:APA1;locus_tag=YCL050C;gene_synonym=DTP1;EC_number=2.7.7.53;note=Diadenosine 5%27%2C5%27%27-P1%2CP4-tetraphosphate phosphorylase I %28AP4A phosphorylase%29%2C involved in catabolism of bis%285%27
chr03	0.841367	0.925458	40724	-	locus_tag=YCL049C;note=Ycl049cp;inference=non-experimental evidence%2C no additional details recorded;product=Protein of unknown function%3B localizes to membrane fraction%3B YCL049C is not an essential gene;protein_id=NP_009881.2;db_xref=SGD:S000000554;d
chr03	0.829287	0.888409	41488	+	locus_tag=YCL048W-A;note=Ycl048w-ap;inference=non-experimental evidence%2C no additional details recorded;product=Putative protein of unknown function;protein_id=NP_001032573.1;db_xref=SGD:S000087203;db_xref=GI:82795242;db_xref=GeneID:3799968;exon_number=
chr03	0.889899	0.895721	42165	+	ID=NC_001135.4:SPS22:unknown_transcript_1;Parent=NC_001135.4:SPS22;locus_tag=YCL048W;note=Sps22p;experiment=experimental evidence%2C no additional details recorded;product=Protein of unknown function%2C redundant with Sps2p for the organization of the bet
chr03	0.941754	0.918835	44437	-	locus_tag=YCL047C;note=Ycl047cp;inference=non-experimental evidence%2C no additional details recorded;product=Putative protein of unknown function;protein_id=NP_009883.1;db_xref=SGD:S000000552;db_xref=GI:6319802;db_xref=GeneID:850310;exon_number=1
chr03	0.883375	0.855682	46905	-	locus_tag=YCL045C;note=Ycl045cp;inference=non-experimental evidence%2C no additional details recorded;product=Protein of unknown function%3B green fluorescent protein %28GFP%29-fusion protein localizes to the ER%3B interacts with Gal80p%3B YCL045C is not
chr03	0.84986	0.965924	48364	-	ID=NC_001135.4:MGR1:unknown_transcript_1;Parent=NC_001135.4:MGR1;locus_tag=YCL044C;note=Subunit%2C with Yme1p%2C of the mitochondrial inner membrane i-AAA protease complex%2C which is responsible for degradation of unfolded or misfolded mitochondrial gene
chr03	0.707905	0.789992	50221	-	ID=NC_001135.4:PDI1:unknown_transcript_1;Parent=NC_001135.4:PDI1;locus_tag=YCL043C;gene_synonym=TRG1;gene_synonym=MFP1;EC_number=5.3.4.1;note=Protein disulfide isomerase%2C multifunctional protein resident in the endoplasmic reticulum lumen%2C essential f
chr03	0.421234	0.605798	50584	+	locus_tag=YCL042W;note=Ycl042wp;inference=non-experimental evidence%2C no additional details recorded;product=Putative protein of unknown function%3B epitope-tagged protein localizes to the cytoplasm;protein_id=NP_009889.2;db_xref=SGD:S000000547;db_xref=G
chr03	0.511183	0.828331	50838	+	ID=NC_001135.4:GLK1:unknown_transcript_1;Parent=NC_001135.4:GLK1;locus_tag=YCL040W;gene_synonym=HOR3;EC_number=2.7.1.2;note=Glucokinase%2C catalyzes the phosphorylation of glucose at C6 in the first irreversible step of glucose metabolism%3B one of three
chr03	0.677005	0.940716	52645	+	ID=NC_001135.4:GID7:unknown_transcript_1;Parent=NC_001135.4:GID7;locus_tag=YCL039W;gene_synonym=MOH2;note=Protein of unknown function%2C involved in proteasome-dependent catabolite inactivation of fructose-1%2C6-bisphosphatase%3B contains six WD40 repeats
chr03	0.978211	0.957634	56527	-	ID=NC_001135.4:ATG22:unknown_transcript_1;Parent=NC_001135.4:ATG22;locus_tag=YCL038C;gene_synonym=AUT4;note=Protein required for the breakdown of autophagic vesicles in the vacuole during autophagy%2C putative integral membrane protein that localizes to v
chr03	0.934108	0.900889	58678	-	ID=NC_001135.4:SRO9:unknown_transcript_1;Parent=NC_001135.4:SRO9;locus_tag=YCL037C;note=Sro9p;experiment=experimental evidence%2C no additional details recorded;product=Cytoplasmic RNA-binding protein that associates with translating ribosomes%3B involved
chr03	0.79739	0.84997	59026	+	ID=NC_001135.4:GFD2:unknown_transcript_1;Parent=NC_001135.4:GFD2;locus_tag=YCL036W;note=Protein of unknown function%2C identified as a high-copy suppressor of a dbp5 mutation;experiment=experimental evidence%2C no additional details recorded;product=Gfd2p
chr03	0.981361	0.973568	61173	-	ID=NC_001135.4:GRX1:unknown_transcript_1;Parent=NC_001135.4:GRX1;locus_tag=YCL035C;note=Hydroperoxide and superoxide-radical responsive heat-stable glutathione-dependent disulfide oxidoreductase with active site cysteine pair%3B protects cells from oxidat
chr03	0.904707	0.937024	61658	+	ID=NC_001135.4:LSB5:unknown_transcript_1;Parent=NC_001135.4:LSB5;locus_tag=YCL034W;note=Protein of unknown function%3B binds Las17p%2C which is a homolog of human Wiskott-Aldrich Syndrome protein involved in actin patch assembly and actin polymerization;e
chr03	0.827921	0.938995	63282	-	locus_tag=YCL033C;note=Ycl033cp;inference=non-experimental evidence%2C no additional details recorded;product=Putative protein-methionine-R-oxide reductase%3B involved in response to oxidative stress%3B similar to mouse Sepx1p and fly SelRp%3B YCL033C is
chr03	0.883733	0.937324	63441	+	ID=NC_001135.4:STE50:unknown_transcript_1;Parent=NC_001135.4:STE50;locus_tag=YCL032W;note=Ste50p;experiment=experimental evidence%2C no additional details recorded;product=Protein involved in mating response%2C invasive%2Ffilamentous growth%2C and osmotol
chr03	0.805091	0.889855	65568	-	ID=NC_001135.4:RRP7:unknown_transcript_1;Parent=NC_001135.4:RRP7;locus_tag=YCL031C;note=Rrp7p;experiment=experimental evidence%2C no additional details recorded;product=Essential protein involved in rRNA processing and ribosome biogenesis;protein_id=NP_00
chr03	0.891951	0.795506	68333	-	ID=NC_001135.4:HIS4:unknown_transcript_1;Parent=NC_001135.4:HIS4;locus_tag=YCL030C;EC_number=1.1.1.23;note=Multifunctional enzyme containing phosphoribosyl-ATP pyrophosphatase%2C phosphoribosyl-AMP cyclohydrolase%2C and histidinol dehydrogenase activities
chr03	0.749916	0.729626	69921	-	ID=NC_001135.4:BIK1:unknown_transcript_1;Parent=NC_001135.4:BIK1;locus_tag=YCL029C;gene_synonym=PAC14;gene_synonym=ARM5;note=Microtubule-associated protein%2C component of the interface between microtubules and kinetochore%2C involved in sister chromatid
chr03	0.844733	0.844606	70150	+	ID=NC_001135.4:RNQ1:unknown_transcript_1;Parent=NC_001135.4:RNQ1;locus_tag=YCL028W;note=%5BPIN%28%2B%29%5D prion%2C an infectious protein conformation that is generally an ordered protein aggregate;experiment=experimental evidence%2C no additional details
chr03	0.922639	0.918198	71803	+	ID=NC_001135.4:FUS1:unknown_transcript_1;Parent=NC_001135.4:FUS1;locus_tag=YCL027W;note=Membrane protein localized to the shmoo tip%2C required for cell fusion%3B expression regulated by mating pheromone%3B proposed to coordinate signaling%2C fusion%2C an
chr03	0.629458	0.774453	73986	-	ID=NC_001135.4:HBN1:unknown_transcript_1;Parent=NC_001135.4:HBN1;locus_tag=YCL026C-B;gene_synonym=YCL027C-A;note=Putative protein of unknown function%3B similar to bacterial nitroreductases%3B green fluorescent protein %28GFP%29-fusion protein localizes t
chr03	0.487927	0.748575	75285	-	ID=NC_001135.4:FRM2:unknown_transcript_1;Parent=NC_001135.4:FRM2;locus_tag=YCL026C-A;gene_synonym=YCLX08C;note=Protein of unknown function%2C involved in the integration of lipid signaling pathways with cellular homeostasis%3B similar to bacterial nitrore
chr03	0.683633	0.920628	77919	-	ID=NC_001135.4:AGP1:unknown_transcript_1;Parent=NC_001135.4:AGP1;locus_tag=YCL025C;gene_synonym=YCC5;note=Low-affinity amino acid permease with broad substrate range%2C involved in uptake of asparagine%2C glutamine%2C and other amino acids%3B expression i
chr03	0.865145	0.960082	79162	+	ID=NC_001135.4:KCC4:unknown_transcript_1;Parent=NC_001135.4:KCC4;locus_tag=YCL024W;note=Protein kinase of the bud neck involved in the septin checkpoint%2C associates with septin proteins%2C negatively regulates Swe1p by phosphorylation%2C shows structura
chr03	0.938259	0.97856	83620	+	locus_tag=YCL021W-A;note=Ycl021w-ap;inference=non-experimental evidence%2C no additional details recorded;product=Putative protein of unknown function;protein_id=NP_065437.1;db_xref=SGD:S000007549;db_xref=GI:10383769;db_xref=GeneID:850338;exon_number=1
chr03	0.953242	0.978688	85102	+	locus_tag=YCL019W;note=Ycl019wp;inference=non-experimental evidence%2C no additional details recorded;product=Retrotransposon TYA Gag and TYB Pol genes%3B transcribed%2Ftranslated as one unit%3B polyprotein is processed to make a nucleocapsid-like protein
chr03	NA	NA	85102	+	locus_tag=YCL020W;note=Ycl020wp;inference=non-experimental evidence%2C no additional details recorded;product=Retrotransposon TYA Gag gene co-transcribed with TYB Pol%3B translated as TYA or TYA-TYB polyprotein%3B Gag is a nucleocapsid protein that is the
chr03	NA	NA	91324	+	ID=NC_001135.4:LEU2:unknown_transcript_1;Parent=NC_001135.4:LEU2;locus_tag=YCL018W;EC_number=1.1.1.85;note=Leu2p;experiment=experimental evidence%2C no additional details recorded;product=Beta-isopropylmalate dehydrogenase %28IMDH%29%2C catalyzes the thir
chr03	0.881156	0.96719	94270	-	ID=NC_001135.4:NFS1:unknown_transcript_1;Parent=NC_001135.4:NFS1;locus_tag=YCL017C;gene_synonym=SPL1;note=Nfs1p;experiment=experimental evidence%2C no additional details recorded;product=Cysteine desulfurase involved in iron-sulfur cluster %28Fe%2FS%29 bi
chr03	0.922415	0.981753	95763	-	ID=NC_001135.4:DCC1:unknown_transcript_1;Parent=NC_001135.4:DCC1;locus_tag=YCL016C;note=Subunit of a complex with Ctf8p and Ctf18p that shares some components with Replication Factor C%2C required for sister chromatid cohesion and telomere length maintena
chr03	0.900842	0.950262	96281	+	ID=NC_001135.4:BUD3:unknown_transcript_1;Parent=NC_001135.4:BUD3;locus_tag=YCL014W;gene_synonym=YCL012W;note=Protein involved in bud-site selection and required for axial budding pattern%3B localizes with septins to bud neck in mitosis and may constitute
chr03	0.825826	0.961823	101788	-	locus_tag=YCL012C;gene_synonym=YCL011C-A;note=Ycl012cp;inference=non-experimental evidence%2C no additional details recorded;product=Putative protein of unknown function%3B orthologs are present in S. bayanus%2C S. paradoxus and Ashbya gossypii%3B YCL012C
chr03	0.904544	0.920359	103358	-	ID=NC_001135.4:GBP2:unknown_transcript_1;Parent=NC_001135.4:GBP2;locus_tag=YCL011C;gene_synonym=RLF6;note=Poly%28A%2B%29 RNA-binding protein%2C involved in the export of mRNAs from the nucleus to the cytoplasm%3B similar to Hrb1p and Npl3p%3B also binds s
chr03	0.88872	0.933444	104350	-	ID=NC_001135.4:SGF29:unknown_transcript_1;Parent=NC_001135.4:SGF29;locus_tag=YCL010C;note=Sgf29p;experiment=experimental evidence%2C no additional details recorded;product=SaGa associated Factor 29kDa%3B Probable 29kKDa Subunit of SAGA histone acetyltrans
chr03	0.90027	0.90708	105548	-	ID=NC_001135.4:ILV6:unknown_transcript_1;Parent=NC_001135.4:ILV6;locus_tag=YCL009C;EC_number=2.2.1.6;note=Regulatory subunit of acetolactate synthase%2C which catalyzes the first step of branched-chain amino acid biosynthesis%3B enhances activity of the I
chr03	0.909548	0.889927	106853	-	ID=NC_001135.4:STP22:unknown_transcript_1;Parent=NC_001135.4:STP22;locus_tag=YCL008C;gene_synonym=VPS23;note=Stp22p;experiment=experimental evidence%2C no additional details recorded;product=Component of the ESCRT-I complex%2C which is involved in ubiquit
chr03	0.928274	0.968144	107023	+	ID=NC_001135.4:VMA9:unknown_transcript_1;Parent=NC_001135.4:VMA9;locus_tag=YCL005W-A;gene_synonym=LDB10;gene_synonym=CWH36;note=Vma9p;experiment=experimental evidence%2C no additional details recorded;product=Vacuolar H%2B ATPase subunit e of the V-ATPase
chr03	0.930192	0.94945	108021	+	ID=NC_001135.4:LDB16:unknown_transcript_1;Parent=NC_001135.4:LDB16;locus_tag=YCL005W;note=Protein of unknown function%3B null mutants have decreased net negative cell surface charge%3B GFP-fusion protein expression is induced in response to the DNA-damagi
chr03	0.924818	0.866743	109105	+	ID=NC_001135.4:PGS1:unknown_transcript_1;Parent=NC_001135.4:PGS1;locus_tag=YCL004W;gene_synonym=YCL003W;gene_synonym=PEL1;EC_number=2.7.8.8;note=Phosphatidylglycerolphosphate synthase%2C catalyzes the synthesis of phosphatidylglycerolphosphate from CDP-di
chr03	0.681803	0.880283	111674	-	locus_tag=YCL002C;note=Ycl002cp;inference=non-experimental evidence%2C no additional details recorded;product=Putative protein of unknown function%3B YCL002C is not an essential gene;protein_id=NP_009924.3;db_xref=SGD:S000000508;db_xref=GI:37362626;db_xre
chr03	0.85478	0.933312	111914	+	ID=NC_001135.4:RER1:unknown_transcript_1;Parent=NC_001135.4:RER1;locus_tag=YCL001W;note=Rer1p;experiment=experimental evidence%2C no additional details recorded;product=Protein involved in retention of membrane proteins%2C including Sec12p%2C in the ER%3B
chr03	0.875058	0.870357	113078	+	locus_tag=YCL001W-A;note=Ycl001w-ap;inference=non-experimental evidence%2C no additional details recorded;product=Putative protein of unknown function%3B YCL001W-A is not an essential gene;protein_id=NP_009926.1;db_xref=SGD:S000007221;db_xref=GI:6319845;d
chr03	0.603168	0.913163	113768	+	locus_tag=YCL001W-B;note=Ycl001w-bp;inference=non-experimental evidence%2C no additional details recorded;product=Putative protein of unknown function%3B identified by homology;protein_id=NP_076878.1;db_xref=SGD:S000007596;db_xref=GI:13129156;db_xref=Gene
chr03	0.771137	0.941154	118346	-	ID=NC_001135.4:CDC10:unknown_transcript_1;Parent=NC_001135.4:CDC10;locus_tag=YCR002C;note=Component of the septin ring of the mother-bud neck that is required for cytokinesis%3B septins recruit proteins to the neck and can act as a barrier to diffusion at
chr03	0.855196	0.922601	118618	+	ID=NC_001135.4:MRPL32:unknown_transcript_1;Parent=NC_001135.4:MRPL32;locus_tag=YCR003W;note=Mrpl32p;experiment=experimental evidence%2C no additional details recorded;product=Mitochondrial ribosomal protein of the large subunit;protein_id=NP_009929.1;db_x
chr03	0.802696	0.897303	120316	-	ID=NC_001135.4:YCP4:unknown_transcript_1;Parent=NC_001135.4:YCP4;locus_tag=YCR004C;note=Ycp4p;experiment=experimental evidence%2C no additional details recorded;product=Protein of unknown function%2C has sequence and structural similarity to flavodoxins%3
chr03	0.682306	0.700508	122326	-	ID=NC_001135.4:CIT2:unknown_transcript_1;Parent=NC_001135.4:CIT2;locus_tag=YCR005C;EC_number=2.3.3.1;note=Citrate synthase%2C catalyzes the condensation of acetyl coenzyme A and oxaloacetate to form citrate%2C peroxisomal isozyme involved in glyoxylate cy
chr03	0.95604	0.713623	126728	-	locus_tag=YCR007C;note=Ycr007cp;inference=non-experimental evidence%2C no additional details recorded;product=Putative integral membrane protein%2C member of DUP240 gene family%3B YCR007C is not an essential gene;protein_id=NP_009933.1;db_xref=SGD:S000000
chr03	0.321143	0.599624	128468	+	ID=NC_001135.4:SAT4:unknown_transcript_1;Parent=NC_001135.4:SAT4;locus_tag=YCR008W;gene_synonym=HAL4;EC_number=2.7.1.-;note=Ser%2FThr protein kinase involved in salt tolerance%3B funtions in regulation of Trk1p-Trk2p potassium transporter%3B partially red
chr03	0.929145	0.966112	131540	-	ID=NC_001135.4:RVS161:unknown_transcript_1;Parent=NC_001135.4:RVS161;locus_tag=YCR009C;gene_synonym=SPE161;gene_synonym=FUS7;gene_synonym=END6;note=Rvs161p;experiment=experimental evidence%2C no additional details recorded;product=Amphiphysin-like lipid r
chr03	0.831507	0.847756	133122	-	ID=NC_001135.4:ADY2:unknown_transcript_1;Parent=NC_001135.4:ADY2;locus_tag=YCR010C;gene_synonym=ATO1;note=Ady2p;experiment=experimental evidence%2C no additional details recorded;product=Acetate transporter required for normal sporulation%3B phosphorylate
chr03	0.764767	0.690294	136871	-	ID=NC_001135.4:ADP1:unknown_transcript_1;Parent=NC_001135.4:ADP1;locus_tag=YCR011C;note=Putative ATP-dependent permease of the ABC transporter family of proteins;experiment=experimental evidence%2C no additional details recorded;product=Adp1p;protein_id=N
chr03	0.800714	0.625754	137744	+	ID=NC_001135.4:PGK1:unknown_transcript_1;Parent=NC_001135.4:PGK1;locus_tag=YCR012W;EC_number=2.7.2.3;note=Pgk1p;experiment=experimental evidence%2C no additional details recorded;product=3-phosphoglycerate kinase%2C catalyzes transfer of high-energy phosp
chr03	0.833904	0.861347	140931	-	ID=NC_001135.4:POL4:unknown_transcript_1;Parent=NC_001135.4:POL4;locus_tag=YCR014C;EC_number=2.7.7.7;note=Pol4p;experiment=experimental evidence%2C no additional details recorded;product=DNA polymerase IV%2C undergoes pair-wise interactions with Dnl4p-Lif
chr03	0.977163	0.910179	142168	-	locus_tag=YCR015C;note=Ycr015cp;inference=non-experimental evidence%2C no additional details recorded;product=Putative protein of unknown function%3B YCR015C is not an essential gene;protein_id=NP_009941.2;db_xref=SGD:S000000608;db_xref=GI:10383783;db_xre
chr03	0.954822	0.849826	143632	+	locus_tag=YCR016W;note=Ycr016wp;inference=non-experimental evidence%2C no additional details recorded;product=Putative protein of unknown function%3B green fluorescent protein %28GFP%29-fusion protein localizes to the nucleolus and nucleus%3B YCR016W is n
chr03	0.841634	0.953079	147632	-	ID=NC_001135.4:CWH43:unknown_transcript_1;Parent=NC_001135.4:CWH43;locus_tag=YCR017C;note=Putative sensor%2Ftransporter protein involved in cell wall biogenesis%3B contains 14-16 transmembrane segments and several putative glycosylation and phosphorylatio
chr03	NA	NA	148901	-	ID=NC_001135.4:SRD1:unknown_transcript_1;Parent=NC_001135.4:SRD1;locus_tag=YCR018C;note=Srd1p;experiment=experimental evidence%2C no additional details recorded;product=Protein involved in the processing of pre-rRNA to mature rRNA%3B contains a C2%2FC2 zi
chr03	0.694798	0.616348	152835	+	ID=NC_001135.4:MAK32:unknown_transcript_1;Parent=NC_001135.4:MAK32;locus_tag=YCR019W;note=Protein necessary for structural stability of L-A double-stranded RNA-containing particles;experiment=experimental evidence%2C no additional details recorded;product
chr03	0.916939	0.956233	154657	-	ID=NC_001135.4:PET18:unknown_transcript_1;Parent=NC_001135.4:PET18;locus_tag=YCR020C;gene_synonym=HIT2;note=Protein required for respiratory growth and stability of the mitochondrial genome;experiment=experimental evidence%2C no additional details recorde
chr03	0.838694	0.846797	155094	-	ID=NC_001135.4:MAK31:unknown_transcript_1;Parent=NC_001135.4:MAK31;locus_tag=YCR020C-A;gene_synonym=SMX1;gene_synonym=LSM9;note=Non-catalytic subunit of N-terminal acetyltransferase of the NatC type%3B required for replication of dsRNA virus%3B member of
chr03	0.925586	0.962178	155318	+	ID=NC_001135.4:HTL1:unknown_transcript_1;Parent=NC_001135.4:HTL1;locus_tag=YCR020W-B;note=Htl1p;experiment=experimental evidence%2C no additional details recorded;product=Component of the RSC chromatin remodeling complex%3B RSC functions in transcriptiona
chr03	0.659879	0.840072	157103	-	ID=NC_001135.4:HSP30:unknown_transcript_1;Parent=NC_001135.4:HSP30;locus_tag=YCR021C;gene_synonym=YRO1;note=Hydrophobic plasma membrane localized%2C stress-responsive protein that negatively regulates the H%28%2B%29-ATPase Pma1p%3B induced by heat shock%2
chr03	0.883853	0.80108	160369	-	locus_tag=YCR023C;note=Ycr023cp;inference=non-experimental evidence%2C no additional details recorded;product=Putative protein of unknown function%3B YCR023C is not an essential gene;protein_id=NP_009952.2;db_xref=SGD:S000000617;db_xref=GI:10383787;db_xre
chr03	0.596473	0.784915	162218	-	ID=NC_001135.4:SLM5:unknown_transcript_1;Parent=NC_001135.4:SLM5;locus_tag=YCR024C;note=Slm5p;experiment=experimental evidence%2C no additional details recorded;product=Mitochondrial asparaginyl-tRNA synthetase;protein_id=NP_009953.1;db_xref=SGD:S00000061
chr03	0.198452	0.678514	162861	-	locus_tag=YCR024C-B;note=Ycr024c-bp;inference=non-experimental evidence%2C no additional details recorded;product=Putative protein of unknown function%3B identified by expression profiling and mass spectrometry;protein_id=NP_878057.1;db_xref=SGD:S00002881
chr03	0.607268	0.85153	163063	-	ID=NC_001135.4:PMP1:unknown_transcript_1;Parent=NC_001135.4:PMP1;locus_tag=YCR024C-A;EC_number=6.1.1.22;note=Small single-membrane span proteolipid that functions as a regulatory subunit of the plasma membrane H%28%2B%29-ATPase Pma1p%2C forms unique helix
chr03	0.968867	0.979324	166335	-	ID=NC_001135.4:NPP1:unknown_transcript_1;Parent=NC_001135.4:NPP1;locus_tag=YCR026C;note=Nucleotide pyrophosphatase%2Fphosphodiesterase family member%3B mediates extracellular nucleotide phosphate hydrolysis along with Npp2p and Pho5p%3B activity and expre
chr03	0.941399	0.914318	167995	-	ID=NC_001135.4:RHB1:unknown_transcript_1;Parent=NC_001135.4:RHB1;locus_tag=YCR027C;gene_synonym=RSG1;note=Rhb1p;experiment=experimental evidence%2C no additional details recorded;product=Putative Rheb-related GTPase involved in regulating canavanine resis
chr03	0.541481	0.891485	172420	-	ID=NC_001135.4:FEN2:unknown_transcript_1;Parent=NC_001135.4:FEN2;locus_tag=YCR028C;note=Plasma membrane H%2B-pantothenate symporter%3B confers sensitivity to the antifungal agent fenpropimorph;experiment=experimental evidence%2C no additional details reco
chr03	0.723547	0.853589	173436	-	ID=NC_001135.4:RIM1:unknown_transcript_1;Parent=NC_001135.4:RIM1;locus_tag=YCR028C-A;note=Single-stranded DNA-binding protein essential for mitochondrial genome maintenance%3B involved in mitochondrial DNA replication;experiment=experimental evidence%2C n
chr03	0.812976	0.858261	176434	-	ID=NC_001135.4:SYP1:unknown_transcript_1;Parent=NC_001135.4:SYP1;locus_tag=YCR030C;gene_synonym=YCR029C-A;note=Syp1p;experiment=experimental evidence%2C no additional details recorded;product=Protein with a potential role in actin cytoskeletal organizatio
chr03	0.672489	0.814238	178216	-	ID=NC_001135.4:RPS14A:unknown_transcript_1;Parent=NC_001135.4:RPS14A;locus_tag=YCR031C;gene_synonym=RPL59;gene_synonym=CRY1;note=Rps14ap;experiment=experimental evidence%2C no additional details recorded;product=Ribosomal protein 59 of the small subunit%2
chr03	0.590094	0.393263	179516	+	ID=NC_001135.4:BPH1:unknown_transcript_1;Parent=NC_001135.4:BPH1;locus_tag=YCR032W;note=PProtein homologous to human Chediak-Higashi syndrome and murine Beige proteins%2C which are implicated in disease syndromes due to defective lysosomal trafficking%3B
chr03	0.934063	0.950515	186485	+	ID=NC_001135.4:SNT1:unknown_transcript_1;Parent=NC_001135.4:SNT1;locus_tag=YCR033W;note=Subunit of the Set3C deacetylase complex that interacts directly with the Set3C subunit%2C Sif2p%3B putative DNA-binding protein;experiment=experimental evidence%2C no
chr03	0.724315	0.713782	190588	+	ID=NC_001135.4:FEN1:unknown_transcript_1;Parent=NC_001135.4:FEN1;locus_tag=YCR034W;gene_synonym=VBM2;gene_synonym=GNS1;gene_synonym=ELO2;note=Fen1p;experiment=experimental evidence%2C no additional details recorded;product=Fatty acid elongase%2C involved
chr03	0.761752	0.896412	193014	-	ID=NC_001135.4:RRP43:unknown_transcript_1;Parent=NC_001135.4:RRP43;locus_tag=YCR035C;note=Rrp43p;experiment=experimental evidence%2C no additional details recorded;product=Protein involved in rRNA processing%3B component of the exosome 3-%3E5 exonuclease
chr03	0.835315	0.957134	193293	+	ID=NC_001135.4:RBK1:unknown_transcript_1;Parent=NC_001135.4:RBK1;locus_tag=YCR036W;EC_number=2.7.1.15;note=Rbk1p;experiment=experimental evidence%2C no additional details recorded;product=Putative ribokinase;protein_id=NP_009965.2;db_xref=SGD:S000000632;d
chr03	0.826129	0.956332	197181	-	ID=NC_001135.4:PHO87:unknown_transcript_1;Parent=NC_001135.4:PHO87;locus_tag=YCR037C;note=Pho87p;experiment=experimental evidence%2C no additional details recorded;product=Low-affinity inorganic phosphate %28Pi%29 transporter%2C involved in activation of
chr03	NA	NA	199545	-	ID=NC_001135.4:BUD5:unknown_transcript_1;Parent=NC_001135.4:BUD5;locus_tag=YCR038C;note=GTP%2FGDP exchange factor for Rsr1p %28Bud1p%29 required for both axial and bipolar budding patterns%3B mutants exhibit random budding in all cell types;experiment=exp
chr03	NA	NA	200174	-	ID=NC_001135.4:MATALPHA2:unknown_transcript_1;Parent=NC_001135.4:MATALPHA2;locus_tag=YCR039C;gene_synonym=ALPHA2;note=Matalpha2p;experiment=experimental evidence%2C no additional details recorded;product=Homeobox-domain protein that%2C with Mcm1p%2C repre
chr03	NA	0.882195	200438	+	ID=NC_001135.4:MATALPHA1:unknown_transcript_1;Parent=NC_001135.4:MATALPHA1;locus_tag=YCR040W;gene_synonym=ALPHA1;note=Transcriptional co-activator involved in regulation of mating-type-specific gene expression%3B targets the transcription factor Mcm1p to
chr03	0.949593	0.985941	205393	-	ID=NC_001135.4:TAF2:unknown_transcript_1;Parent=NC_001135.4:TAF2;locus_tag=YCR042C;gene_synonym=TSM1;gene_synonym=TAF150;note=Taf2p;experiment=experimental evidence%2C no additional details recorded;product=TFIID subunit %28150 kDa%29%2C involved in RNA p
chr03	0.951765	0.966167	206640	-	locus_tag=YCR043C;note=Ycr043cp;inference=non-experimental evidence%2C no additional details recorded;product=Putative protein of unknown function%3B green fluorescent protein %28GFP%29-fusion protein localizes to the Golgi apparatus%3B YCR043C is not an
chr03	0.732808	0.864097	207946	-	ID=NC_001135.4:PER1:unknown_transcript_1;Parent=NC_001135.4:PER1;locus_tag=YCR044C;gene_synonym=COS16;note=Protein of the endoplasmic reticulum%2C required for GPI-phospholipase A2 activity that remodels the GPI anchor as a prerequisite for association of
chr03	0.885238	0.953559	209606	-	locus_tag=YCR045C;EC_number=3.4.21.-;note=Ycr045cp;inference=non-experimental evidence%2C no additional details recorded;product=Putative protein of unknown function;protein_id=NP_009974.1;db_xref=SGD:S000000641;db_xref=GI:6319893;db_xref=GeneID:850412;ex
chr03	0.896006	0.87322	210419	-	ID=NC_001135.4:IMG1:unknown_transcript_1;Parent=NC_001135.4:IMG1;locus_tag=YCR046C;note=Mitochondrial ribosomal protein of the large subunit%2C required for respiration and for maintenance of the mitochondrial genome;experiment=experimental evidence%2C no
chr03	0.681193	0.796607	211541	-	ID=NC_001135.4:BUD23:unknown_transcript_1;Parent=NC_001135.4:BUD23;locus_tag=YCR047C;note=Protein involved in bud-site selection%3B diploid mutants display a random budding pattern instead of the wild-type bipolar pattern;experiment=experimental evidence%
chr03	0.837419	0.804053	211925	+	ID=NC_001135.4:ARE1:unknown_transcript_1;Parent=NC_001135.4:ARE1;locus_tag=YCR048W;gene_synonym=SAT2;EC_number=2.3.1.26;note=Are1p;experiment=experimental evidence%2C no additional details recorded;product=Acyl-CoA:sterol acyltransferase%2C isozyme of Are
chr03	0.883045	0.888824	213768	-	locus_tag=YCR050C;note=Ycr050cp;inference=non-experimental evidence%2C no additional details recorded;product=Non-essential protein of unknown function%3B deletion mutant is synthetically sick or lethal with alpha-synuclein;protein_id=NP_009979.1;db_xref=
chr03	0.982501	0.926777	214067	+	locus_tag=YCR051W;note=Ycr051wp;inference=non-experimental evidence%2C no additional details recorded;product=Putative protein of unknown function%3B green fluorescent protein %28GFP%29-fusion protein localizes to the cytoplasm and nucleus%3B contains ank
chr03	0.923339	0.879783	214990	+	ID=NC_001135.4:RSC6:unknown_transcript_1;Parent=NC_001135.4:RSC6;locus_tag=YCR052W;note=Rsc6p;experiment=experimental evidence%2C no additional details recorded;product=Component of the RSC chromatin remodeling complex%3B essential for mitotic growth%3B h
chr03	0.989728	0.992624	216693	+	ID=NC_001135.4:THR4:unknown_transcript_1;Parent=NC_001135.4:THR4;locus_tag=YCR053W;EC_number=4.2.3.1;note=Threonine synthase%2C conserved protein that catalyzes formation of threonine from 0-phosphohomoserine%3B expression is regulated by the GCN4-mediate
chr03	0.935441	0.964942	220063	-	ID=NC_001135.4:CTR86:unknown_transcript_1;Parent=NC_001135.4:CTR86;locus_tag=YCR054C;note=Essential protein of unknown function%3B upstream region contains a Gcn4p responsive site suggesting a possible role in amino acid biosynthesis;experiment=experiment
chr03	0.728591	0.836494	223224	-	ID=NC_001135.4:PWP2:unknown_transcript_1;Parent=NC_001135.4:PWP2;locus_tag=YCR057C;gene_synonym=UTP1;gene_synonym=YCR058C;gene_synonym=YCR055C;note=Pwp2p;experiment=experimental evidence%2C no additional details recorded;product=Conserved 90S pre-ribosoma
chr03	0.728652	0.882644	224226	-	ID=NC_001135.4:YIH1:unknown_transcript_1;Parent=NC_001135.4:YIH1;locus_tag=YCR059C;note=Yih1p;experiment=experimental evidence%2C no additional details recorded;product=Protein that inhibits activation of Gcn2p%2C an eIF2 alpha subunit protein kinase%2C b
chr03	0.685684	0.798193	224395	+	ID=NC_001135.4:TAH1:unknown_transcript_1;Parent=NC_001135.4:TAH1;locus_tag=YCR060W;note=Tah1p;experiment=experimental evidence%2C no additional details recorded;product=HSP90 cofactor%3B interacts with Hsp82p%2C Pih1p%2C Rvb1 and Rvb2%2C contains a single
chr03	0.914087	0.888348	225559	+	locus_tag=YCR061W;gene_synonym=YCR062W;note=Ycr061wp;inference=non-experimental evidence%2C no additional details recorded;product=Protein of unknown function%3B green fluorescent protein %28GFP%29-fusion protein localizes to the cytoplasm in a punctate p
chr03	0.864647	0.899092	228314	+	ID=NC_001135.4:BUD31:unknown_transcript_1;Parent=NC_001135.4:BUD31;locus_tag=YCR063W;gene_synonym=CWC14;note=Protein involved in bud-site selection%3B analysis of integrated high-throughput datasets predicts an involvement in RNA splicing%3B diploid mutan
chr03	0.826992	0.939493	229306	+	ID=NC_001135.4:HCM1:unknown_transcript_1;Parent=NC_001135.4:HCM1;locus_tag=YCR065W;note=Hcm1p;experiment=experimental evidence%2C no additional details recorded;product=Forkhead transcription factor that drives S-phase specific expression of genes involve
chr03	0.747454	0.798278	231496	+	ID=NC_001135.4:RAD18:unknown_transcript_1;Parent=NC_001135.4:RAD18;locus_tag=YCR066W;note=Rad18p;experiment=experimental evidence%2C no additional details recorded;product=Protein involved in postreplication repair%3B binds single-stranded DNA and has sin
chr03	0.923862	0.92055	236318	-	ID=NC_001135.4:SED4:unknown_transcript_1;Parent=NC_001135.4:SED4;locus_tag=YCR067C;note=Sed4p;experiment=experimental evidence%2C no additional details recorded;product=Integral endoplasmic reticulum membrane protein%2C functions as a positive regulator o
chr03	0.905236	0.888676	237210	+	ID=NC_001135.4:ATG15:unknown_transcript_1;Parent=NC_001135.4:ATG15;locus_tag=YCR068W;gene_synonym=CVT17;gene_synonym=AUT5;note=Lipase%2C required for intravacuolar lysis of autophagic bodies%3B located in the endoplasmic reticulum membrane and targeted to
chr03	0.955779	0.862161	239051	+	ID=NC_001135.4:CPR4:unknown_transcript_1;Parent=NC_001135.4:CPR4;locus_tag=YCR069W;gene_synonym=SCC3;gene_synonym=YCR070W;gene_synonym=CYP4;EC_number=5.2.1.8;note=Peptidyl-prolyl cis-trans isomerase %28cyclophilin%29%2C catalyzes the cis-trans isomerizati
chr03	0.645187	0.850258	240539	-	ID=NC_001135.4:IMG2:unknown_transcript_1;Parent=NC_001135.4:IMG2;locus_tag=YCR071C;note=Mitochondrial ribosomal protein of the small subunit;experiment=experimental evidence%2C no additional details recorded;product=Img2p;protein_id=NP_009996.2;db_xref=SG
chr03	0.885176	0.992201	242348	-	ID=NC_001135.4:RSA4:unknown_transcript_1;Parent=NC_001135.4:RSA4;locus_tag=YCR072C;note=WD-repeat protein involved in ribosome biogenesis%3B may interact with ribosomes%3B required for maturation and efficient intra-nuclear transport or pre-60S ribosomal
chr03	0.948963	0.914789	246580	-	ID=NC_001135.4:SSK22:unknown_transcript_1;Parent=NC_001135.4:SSK22;locus_tag=YCR073C;EC_number=2.7.-.-;note=Ssk22p;experiment=experimental evidence%2C no additional details recorded;product=MAP kinase kinase kinase of the HOG1 mitogen-activated signaling
chr03	0.774097	0.76089	246960	+	ID=NC_001135.4:SOL2:unknown_transcript_1;Parent=NC_001135.4:SOL2;locus_tag=YCR073W-A;gene_synonym=YCRX13W;note=Sol2p;experiment=experimental evidence%2C no additional details recorded;product=Protein with a possible role in tRNA export%3B shows similarity
chr03	0.784084	0.913221	248812	-	ID=NC_001135.4:ERS1:unknown_transcript_1;Parent=NC_001135.4:ERS1;locus_tag=YCR075C;note=Protein with similarity to human cystinosin%2C which is a H%28%2B%29-driven transporter involved in L-cystine export from lysosomes and implicated in the disease cysti
chr03	0.926218	0.970912	248972	+	locus_tag=YCR075W-A;note=Ycr075w-ap;inference=non-experimental evidence%2C no additional details recorded;product=Putative protein of unknown function%3B identified by homology to Ashbya gossypii;protein_id=NP_878058.1;db_xref=SGD:S000028519;db_xref=GI:33
chr03	0.902768	0.97185	250042	-	locus_tag=YCR076C;note=Ycr076cp;inference=non-experimental evidence%2C no additional details recorded;product=Putative protein of unknown function%3B YCR076C is not an essential gene;protein_id=NP_010001.1;db_xref=SGD:S000000672;db_xref=GI:6319920;db_xref
chr03	0.944301	0.93479	252625	-	ID=NC_001135.4:PAT1:unknown_transcript_1;Parent=NC_001135.4:PAT1;locus_tag=YCR077C;gene_synonym=MRT1;note=Topoisomerase II-associated deadenylation-dependent mRNA-decapping factor%3B also required for faithful chromosome transmission%2C maintenance of rDN
chr03	0.921039	0.863466	252842	+	ID=NC_001135.4:PTC6:unknown_transcript_1;Parent=NC_001135.4:PTC6;locus_tag=YCR079W;gene_synonym=AUP1;note=Ptc6p;experiment=experimental evidence%2C no additional details recorded;product=Phosphoprotein phosphatase type 2C similar to mammalian PP1Ks%3B inv
chr03	0.434193	0.913926	254368	+	ID=NC_001135.4:SRB8:unknown_transcript_1;Parent=NC_001135.4:SRB8;locus_tag=YCR081W;gene_synonym=MED12;gene_synonym=YCR080W;gene_synonym=SSN5;gene_synonym=NUT6;gene_synonym=GIG1;note=Subunit of the RNA polymerase II mediator complex%3B associates with core
chr03	0.788689	0.915335	258880	+	ID=NC_001135.4:AHC2:unknown_transcript_1;Parent=NC_001135.4:AHC2;locus_tag=YCR082W;note=Protein of unknown function%2C putative transcriptional regulator%3B proposed to be a Ada Histone acetyltransferase complex component%3B GFP tagged protein is localize
chr03	0.878372	0.90208	259575	+	ID=NC_001135.4:TRX3:unknown_transcript_1;Parent=NC_001135.4:TRX3;locus_tag=YCR083W;note=Trx3p;experiment=experimental evidence%2C no additional details recorded;product=Mitochondrial thioredoxin%2C highly conserved oxidoreductase required to maintain the
chr03	0.866538	0.97088	262449	-	ID=NC_001135.4:TUP1:unknown_transcript_1;Parent=NC_001135.4:TUP1;locus_tag=YCR084C;gene_synonym=UMR7;gene_synonym=SFL2;gene_synonym=ROX4;gene_synonym=FLK1;gene_synonym=CYC9;gene_synonym=CRT4;gene_synonym=AMM1;gene_synonym=AER2;gene_synonym=AAR1;note=Tup1p
chr03	0.874085	0.979829	263389	+	ID=NC_001135.4:CSM1:unknown_transcript_1;Parent=NC_001135.4:CSM1;locus_tag=YCR086W;note=Nucleolar protein that forms a complex with Lrs4p which binds Mam1p at kinetochores during meiosis I to mediate accurate chromosome segregation%2C may be involved in p
chr03	0.975399	0.993232	264464	-	ID=NC_001135.4:LUG1:unknown_transcript_1;Parent=NC_001135.4:LUG1;locus_tag=YCR087C-A;note=Putative protein of unknown function%3B green fluorescent protein %28GFP%29-fusion protein localizes to the nucleolus%3B YCR087C-A is not an essential gene;experimen
chr03	0.803226	0.954692	265065	+	ID=NC_001135.4:ABP1:unknown_transcript_1;Parent=NC_001135.4:ABP1;locus_tag=YCR088W;note=Actin-binding protein of the cortical actin cytoskeleton%2C important for activation of the Arp2%2F3 complex that plays a key role actin in cytoskeleton organization;e
chr03	0.869776	0.926812	267431	+	ID=NC_001135.4:FIG2:unknown_transcript_1;Parent=NC_001135.4:FIG2;locus_tag=YCR089W;note=Fig2p;experiment=experimental evidence%2C no additional details recorded;product=Cell wall adhesin%2C expressed specifically during mating%3B may be involved in mainte
chr03	0.965637	0.950189	272860	-	locus_tag=YCR090C;note=Ycr090cp;inference=non-experimental evidence%2C no additional details recorded;product=Putative protein of unknown function%3B green fluorescent protein %28GFP%29-fusion protein localizes to the cytoplasm and nucleus%3B YCR090C is n
chr03	0.88491	0.885291	274401	+	ID=NC_001135.4:KIN82:unknown_transcript_1;Parent=NC_001135.4:KIN82;locus_tag=YCR091W;EC_number=2.7.1.-;note=Putative serine%2Fthreonine protein kinase%2C most similar to cyclic nucleotide-dependent protein kinase subfamily and the protein kinase C subfami
chr03	0.897916	0.952773	279817	-	ID=NC_001135.4:MSH3:unknown_transcript_1;Parent=NC_001135.4:MSH3;locus_tag=YCR092C;note=Msh3p;experiment=experimental evidence%2C no additional details recorded;product=Mismatch repair protein%2C forms dimers with Msh2p that mediate repair of insertion or
chr03	0.620667	0.775596	280114	+	ID=NC_001135.4:CDC39:unknown_transcript_1;Parent=NC_001135.4:CDC39;locus_tag=YCR093W;gene_synonym=SMD6;gene_synonym=ROS1;gene_synonym=NOT1;note=Component of the CCR4-NOT complex%2C which has multiple roles in regulating mRNA levels including regulation of
chr03	0.841246	0.695619	286759	+	ID=NC_001135.4:CDC50:unknown_transcript_1;Parent=NC_001135.4:CDC50;locus_tag=YCR094W;note=Endosomal protein that regulates cell polarity%2C controls polarized growth%3B similar to Ynr048wp and Lem3p;experiment=experimental evidence%2C no additional detail
chr03	0.918566	0.938704	289255	-	ID=NC_001135.4:OCA4:unknown_transcript_1;Parent=NC_001135.4:OCA4;locus_tag=YCR095C;note=Oca4p;experiment=experimental evidence%2C no additional details recorded;product=Cytoplasmic protein required for replication of Brome mosaic virus in S. cerevisiae%2C
chr03	0.776401	0.95353	289636	+	locus_tag=YCR095W-A;note=Ycr095w-ap;inference=non-experimental evidence%2C no additional details recorded;product=Putative protein of unknown function;protein_id=NP_001018032.1;db_xref=SGD:S000029724;db_xref=GI:63535565;db_xref=GeneID:3077354;exon_number=
chr03	0.947304	0.981298	293535	-	ID=NC_001135.4:HMRA2:unknown_transcript_1;Parent=NC_001135.4:HMRA2;locus_tag=YCR096C;gene_synonym=A2;note=Silenced copy of a2 at HMR%3B similarity to Alpha2p%3B required along with a1p for inhibiting expression of the HO endonuclease in a%2Falpha HO%2FHO
chr03	0.86637	0.93824	293832	+	ID=NC_001135.4:HMRA1:unknown_transcript_1;Parent=NC_001135.4:HMRA1;locus_tag=YCR097W;gene_synonym=YCR097WB;note=Silenced copy of a1 at HMR%3B homeobox corepressor that interacts with Alpha2p to repress haploid-specific gene transcription in diploid cells;
chr03	0.865665	0.90748	298602	-	ID=NC_001135.4:GIT1:unknown_transcript_1;Parent=NC_001135.4:GIT1;locus_tag=YCR098C;note=Plasma membrane permease%2C mediates uptake of glycerophosphoinositol and glycerophosphocholine as sources of the nutrients inositol and phosphate%3B expression and tr
chr03	-0.0168055	0.487127	301296	-	locus_tag=YCR099C;note=Ycr099cp;inference=non-experimental evidence%2C no additional details recorded;product=Putative protein of unknown function;protein_id=NP_010023.1;db_xref=SGD:S000000696;db_xref=GI:6319942;db_xref=GeneID:850463;exon_number=1
chr03	0.340579	0.576555	302218	-	locus_tag=YCR100C;note=Ycr100cp;inference=non-experimental evidence%2C no additional details recorded;product=Putative protein of unknown function;protein_id=NP_010024.1;db_xref=SGD:S000000697;db_xref=GI:6319943;db_xref=GeneID:850464;exon_number=1
chr03	0.587265	0.885469	303027	-	locus_tag=YCR101C;note=Ycr101cp;inference=non-experimental evidence%2C no additional details recorded;product=Putative protein of unknown function%3B localizes to the membrane fraction%3B YCR101C is not an essential gene;protein_id=NP_010025.1;db_xref=SGD
chr03	0.904833	0.928754	305464	-	locus_tag=YCR102C;note=Ycr102cp;inference=non-experimental evidence%2C no additional details recorded;product=Putative protein of unknown function%3B involved in copper metabolism%3B similar to C.carbonum toxD gene%3B YCR102C is not an essential gene;prot
chr03	0.60071	0.925065	307798	+	ID=NC_001135.4:PAU3:unknown_transcript_1;Parent=NC_001135.4:PAU3;locus_tag=YCR104W;note=Pau3p;experiment=experimental evidence%2C no additional details recorded;product=Part of 23-member seripauperin multigene family encoded mainly in subtelomeric regions
chr03	0.880809	0.917576	309067	+	ID=NC_001135.4:ADH7:unknown_transcript_1;Parent=NC_001135.4:ADH7;locus_tag=YCR105W;gene_synonym=ADHVII;EC_number=1.1.1.-;note=NADPH-dependent medium chain alcohol dehydrogenase with broad substrate specificity%3B member of the cinnamyl family of alcohol d
chr03	0.624652	0.95888	310955	+	ID=NC_001135.4:RDS1:unknown_transcript_1;Parent=NC_001135.4:RDS1;locus_tag=YCR106W;note=Zinc cluster transcription factor involved in conferring resistance to cycloheximide;experiment=experimental evidence%2C no additional details recorded;product=Rds1p;p
chr03	-0.0494524	0.861409	313887	+	ID=NC_001135.4:AAD3:unknown_transcript_1;Parent=NC_001135.4:AAD3;locus_tag=YCR107W;note=Putative aryl-alcohol dehydrogenase with similarity to P. chrysosporium aryl-alcohol dehydrogenase%3B mutational analysis has not yet revealed a physiological role;exp
chr03	0.985803	0.993861	316185	-	locus_tag=YCR108C;note=Ycr108cp;inference=non-experimental evidence%2C no additional details recorded;product=Putative protein of unknown function%3B identified by fungal homology and RT-PCR;protein_id=NP_878059.1;db_xref=SGD:S000028536;db_xref=GI:3343877
chr04	0.964701	0.980217	1802	+	ID=NC_001136.8:COS7:unknown_transcript_1;Parent=NC_001136.8:COS7;locus_tag=YDL248W;note=Protein of unknown function%2C member of the DUP380 subfamily of conserved%2C often subtelomerically-encoded proteins%3B the authentic%2C non-tagged protein is detecte
chr04	0.989686	0.997998	5985	+	ID=NC_001136.8:MPH2:unknown_transcript_1;Parent=NC_001136.8:MPH2;locus_tag=YDL247W;note=Mph2p;experiment=experimental evidence%2C no additional details recorded;product=Alpha-glucoside permease%2C transports maltose%2C maltotriose%2C alpha-methylglucoside
chr04	NA	0.861409	9756	-	ID=NC_001136.8:SOR2:unknown_transcript_1;Parent=NC_001136.8:SOR2;locus_tag=YDL246C;note=Sor2p;experiment=experimental evidence%2C no additional details recorded;product=Protein of unknown function%2C computational analysis of large-scale protein-protein i
chr04	NA	0.689834	13360	-	ID=NC_001136.8:HXT15:unknown_transcript_1;Parent=NC_001136.8:HXT15;locus_tag=YDL245C;note=Protein of unknown function with similarity to hexose transporter family members%2C expression is induced by low levels of glucose and repressed by high levels of gl
chr04	NA	NA	16204	+	ID=NC_001136.8:THI13:unknown_transcript_1;Parent=NC_001136.8:THI13;locus_tag=YDL244W;note=Thi13p;experiment=experimental evidence%2C no additional details recorded;product=Protein involved in synthesis of the thiamine precursor hydroxymethylpyrimidine %28
chr04	0.666121	0.950347	18566	-	ID=NC_001136.8:AAD4:unknown_transcript_1;Parent=NC_001136.8:AAD4;locus_tag=YDL243C;note=Putative aryl-alcohol dehydrogenase with similarity to P. chrysosporium aryl-alcohol dehydrogenase%2C involved in the oxidative stress response;experiment=experimental
chr04	0.842956	0.933864	20635	+	locus_tag=YDL241W;note=Ydl241wp;inference=non-experimental evidence%2C no additional details recorded;product=Putative protein of unknown function%3B YDL241W is not an essential gene;protein_id=NP_010040.1;db_xref=SGD:S000002400;db_xref=GI:6319960;db_xref
chr04	0.921978	0.937956	22823	+	ID=NC_001136.8:LRG1:unknown_transcript_1;Parent=NC_001136.8:LRG1;locus_tag=YDL240W;note=Putative GTPase-activating protein %28GAP%29 involved in the Pkc1p-mediated signaling pathway that controls cell wall integrity%3B appears to specifically regulate 1%2
chr04	0.813855	0.715232	28775	-	ID=NC_001136.8:ADY3:unknown_transcript_1;Parent=NC_001136.8:ADY3;locus_tag=YDL239C;note=Protein required for spore wall formation%2C thought to mediate assembly of a Don1p-containing structure at the leading edge of the prospore membrane via interaction w
chr04	0.753866	0.870182	30454	-	ID=NC_001136.8:GUD1:unknown_transcript_1;Parent=NC_001136.8:GUD1;locus_tag=YDL238C;note=Gud1p;experiment=experimental evidence%2C no additional details recorded;product=Guanine deaminase%2C a catabolic enzyme of the guanine salvage pathway producing xanth
chr04	0.669081	0.889233	30657	+	ID=NC_001136.8:LRC1:unknown_transcript_1;Parent=NC_001136.8:LRC1;locus_tag=YDL237W;note=Putative protein of unknown function%3B YDL237W is not an essential gene%3B null mutant displays decreased frequency of mitochondrial genome loss %28petite formation%2
chr04	0.803243	0.943693	32296	+	ID=NC_001136.8:PHO13:unknown_transcript_1;Parent=NC_001136.8:PHO13;locus_tag=YDL236W;EC_number=3.1.3.41;note=Pho13p;experiment=experimental evidence%2C no additional details recorded;product=Alkaline phosphatase specific for p-nitrophenyl phosphate%2C inv
chr04	0.786394	0.791997	33918	-	ID=NC_001136.8:YPD1:unknown_transcript_1;Parent=NC_001136.8:YPD1;locus_tag=YDL235C;note=Ypd1p;experiment=experimental evidence%2C no additional details recorded;product=Phosphorelay intermediate protein%2C phosphorylated by the plasma membrane sensor Sln1
chr04	0.697486	0.904362	36478	-	ID=NC_001136.8:GYP7:unknown_transcript_1;Parent=NC_001136.8:GYP7;locus_tag=YDL234C;note=Gyp7p;experiment=experimental evidence%2C no additional details recorded;product=GTPase-activating protein for yeast Rab family members including: Ypt7p %28most effect
chr04	0.957672	0.978575	36798	+	locus_tag=YDL233W;note=Ydl233wp;inference=non-experimental evidence%2C no additional details recorded;product=Putative protein of unknown function%3B green fluorescent protein %28GFP%29-fusion protein localizes to the cytoplasm and nucleus%3B YDL233W is n
chr04	0.979593	0.970413	38488	+	ID=NC_001136.8:OST4:unknown_transcript_1;Parent=NC_001136.8:OST4;locus_tag=YDL232W;EC_number=2.4.1.119;note=Subunit of the oligosaccharyltransferase complex of the ER lumen%2C which catalyzes protein asparagine-linked glycosylation%3B type I membrane prot
chr04	0.9028	0.905082	42245	-	ID=NC_001136.8:BRE4:unknown_transcript_1;Parent=NC_001136.8:BRE4;locus_tag=YDL231C;note=Zinc finger protein containing five transmembrane domains%3B null mutant exhibits strongly fragmented vacuoles and sensitivity to brefeldin A%2C a drug which is known
chr04	0.641727	0.721566	42701	+	ID=NC_001136.8:PTP1:unknown_transcript_1;Parent=NC_001136.8:PTP1;locus_tag=YDL230W;EC_number=3.1.3.48;note=Ptp1p;experiment=experimental evidence%2C no additional details recorded;product=Phosphotyrosine-specific protein phosphatase that dephosphorylates
chr04	0.827804	0.943494	44066	+	ID=NC_001136.8:SSB1:unknown_transcript_1;Parent=NC_001136.8:SSB1;locus_tag=YDL229W;gene_synonym=YG101;note=Ssb1p;experiment=experimental evidence%2C no additional details recorded;product=Cytoplasmic ATPase that is a ribosome-associated molecular chaperon
chr04	0.759304	0.875496	48032	-	ID=NC_001136.8:HO:unknown_transcript_1;Parent=NC_001136.8:HO;locus_tag=YDL227C;note=Site-specific endonuclease required for gene conversion at the MAT locus %28homothallic switching%29 through the generation of a ds DNA break%3B expression restricted to m
chr04	0.807667	0.951514	52174	-	ID=NC_001136.8:GCS1:unknown_transcript_1;Parent=NC_001136.8:GCS1;locus_tag=YDL226C;note=Gcs1p;experiment=experimental evidence%2C no additional details recorded;product=ADP-ribosylation factor GTPase activating protein %28ARF GAP%29%2C involved in ER-Golg
chr04	0.950053	0.978441	52446	+	ID=NC_001136.8:SHS1:unknown_transcript_1;Parent=NC_001136.8:SHS1;locus_tag=YDL225W;gene_synonym=SEP7;note=Shs1p;experiment=experimental evidence%2C no additional details recorded;product=One of five related septins %28Cdc3p%2C Cdc10p%2C Cdc11p%2C Cdc12p%2
chr04	0.125147	0.69058	56347	-	ID=NC_001136.8:WHI4:unknown_transcript_1;Parent=NC_001136.8:WHI4;locus_tag=YDL224C;note=Whi4p;experiment=experimental evidence%2C no additional details recorded;product=Putative RNA binding protein and partially redundant Whi3p homolog that regulates the
chr04	0.924664	0.93023	60406	-	ID=NC_001136.8:HBT1:unknown_transcript_1;Parent=NC_001136.8:HBT1;locus_tag=YDL223C;note=Substrate of the Hub1p ubiquitin-like protein that localizes to the shmoo tip %28mating projection%29%3B mutants are defective for mating projection formation%2C there
chr04	0.722871	0.880551	61802	-	ID=NC_001136.8:FMP45:unknown_transcript_1;Parent=NC_001136.8:FMP45;locus_tag=YDL222C;note=Integral membrane protein localized to mitochondria %28untagged protein%29 and eisosomes%2C immobile patches at the cortex associated with endocytosis%3B sporulation
chr04	0.876441	0.899205	65019	-	ID=NC_001136.8:CDC13:unknown_transcript_1;Parent=NC_001136.8:CDC13;locus_tag=YDL220C;gene_synonym=EST4;note=Single stranded DNA-binding protein found at TG1-3 telomere G-tails%3B regulates telomere replication through recruitment of specific sub-complexes
chr04	0.577551	0.624973	65243	+	ID=NC_001136.8:DTD1:unknown_transcript_1;Parent=NC_001136.8:DTD1;locus_tag=YDL219W;note=Dtd1p;experiment=experimental evidence%2C no additional details recorded;product=D-Tyr-tRNA%28Tyr%29 deacylase%2C functions in protein translation%2C may affect nonsen
chr04	0.928186	0.956429	66494	+	locus_tag=YDL218W;note=Ydl218wp;inference=non-experimental evidence%2C no additional details recorded;product=Putative protein of unknown function%3B YDL218W transcription is regulated by Azf1p and induced by starvation and aerobic conditions;protein_id=N
chr04	0.727136	0.772067	68607	-	ID=NC_001136.8:TIM22:unknown_transcript_1;Parent=NC_001136.8:TIM22;locus_tag=YDL217C;note=Tim22p;experiment=experimental evidence%2C no additional details recorded;product=Component of the mitochondrial Tim54p-Tim22p complex involved in insertion of polyt
chr04	0.668698	0.894053	70320	-	ID=NC_001136.8:RRI1:unknown_transcript_1;Parent=NC_001136.8:RRI1;locus_tag=YDL216C;gene_synonym=JAB1;gene_synonym=CSN5;note=Rri1p;experiment=experimental evidence%2C no additional details recorded;product=Catalytic subunit of the COP9 signalosome %28CSN%2
chr04	0.836534	0.976429	73919	-	ID=NC_001136.8:GDH2:unknown_transcript_1;Parent=NC_001136.8:GDH2;locus_tag=YDL215C;EC_number=1.4.1.2;note=NAD%28%2B%29-dependent glutamate dehydrogenase%2C degrades glutamate to ammonia and alpha-ketoglutarate%3B expression sensitive to nitrogen catabolit
chr04	0.791647	0.952895	76546	-	ID=NC_001136.8:PRR2:unknown_transcript_1;Parent=NC_001136.8:PRR2;locus_tag=YDL214C;note=Serine%2Fthreonine protein kinase that inhibits pheromone induced signalling downstream of MAPK%2C possibly at the level of the Ste12p transcription factor;experiment=
chr04	0.664197	0.916107	77967	-	ID=NC_001136.8:NOP6:unknown_transcript_1;Parent=NC_001136.8:NOP6;locus_tag=YDL213C;note=Putative RNA-binding protein implicated in ribosome biogenesis%3B contains an RNA recognition motif %28RRM%29 and has similarity to hydrophilins%3B NOP6 may be a funga
chr04	0.832851	0.857305	78427	+	ID=NC_001136.8:SHR3:unknown_transcript_1;Parent=NC_001136.8:SHR3;locus_tag=YDL212W;gene_synonym=APF1;note=Shr3p;experiment=experimental evidence%2C no additional details recorded;product=Endoplasmic reticulum packaging chaperone%2C required for incorporat
chr04	0.750027	0.880351	80413	-	locus_tag=YDL211C;note=Ydl211cp;inference=non-experimental evidence%2C no additional details recorded;product=Putative protein of unknown function%3B green fluorescent protein %28GFP%29-fusion protein localizes to the vacuole;protein_id=NP_010070.1;db_xre
chr04	0.646092	0.908519	84271	+	ID=NC_001136.8:UGA4:unknown_transcript_1;Parent=NC_001136.8:UGA4;locus_tag=YDL210W;note=Uga4p;experiment=experimental evidence%2C no additional details recorded;product=Permease that serves as a gamma-aminobutyrate %28GABA%29 transport protein involved in
chr04	0.793844	0.967487	87227	-	ID=NC_001136.8:CWC2:unknown_transcript_1;Parent=NC_001136.8:CWC2;locus_tag=YDL209C;gene_synonym=NTC40;note=Protein involved in pre-mRNA splicing%2C component of a complex containing Cef1p%3B interacts with Prp19p%3B contains an RNA recognition motif%3B ha
chr04	0.987265	0.987895	87513	+	ID=NC_001136.8:NHP2:unknown_transcript_1;Parent=NC_001136.8:NHP2;locus_tag=YDL208W;note=Nuclear protein related to mammalian high mobility group %28HMG%29 proteins%2C essential for function of H%2FACA-type snoRNPs%2C which are involved in 18S rRNA process
chr04	0.789591	0.966261	88249	+	ID=NC_001136.8:GLE1:unknown_transcript_1;Parent=NC_001136.8:GLE1;locus_tag=YDL207W;gene_synonym=BRR3;gene_synonym=RSS1;note=Gle1p;experiment=experimental evidence%2C no additional details recorded;product=Cytoplasmic nucleoporin required for polyadenylate
chr04	0.532937	0.505464	90177	+	locus_tag=YDL206W;note=Ydl206wp;inference=non-experimental evidence%2C no additional details recorded;product=Putative protein of unknown function%3B YDL206W is not an essential protein;protein_id=NP_010075.1;db_xref=SGD:S000002365;db_xref=GI:6319995;db_x
chr04	0.652587	0.854089	93746	-	ID=NC_001136.8:HEM3:unknown_transcript_1;Parent=NC_001136.8:HEM3;locus_tag=YDL205C;EC_number=2.5.1.61;note=Phorphobilinogen deaminase%2C catalyzes the conversion of 4-porphobilinogen to hydroxymethylbilane%2C the third step in the heme biosynthetic pathwa
chr04	0.786462	0.801823	94606	+	ID=NC_001136.8:RTN2:unknown_transcript_1;Parent=NC_001136.8:RTN2;locus_tag=YDL204W;note=Rtn2p;experiment=experimental evidence%2C no additional details recorded;product=Protein of unknown function%3B has similarity to mammalian reticulon proteins%3B membe
chr04	0.896454	0.814125	97954	-	ID=NC_001136.8:ACK1:unknown_transcript_1;Parent=NC_001136.8:ACK1;locus_tag=YDL203C;note=Putative protein of unknown function%3B GFP-fusion protein expression is induced in response to the DNA-damaging agent MMS%3B the authentic%2C non-tagged protein is de
chr04	0.819989	0.692527	98476	+	ID=NC_001136.8:MRPL11:unknown_transcript_1;Parent=NC_001136.8:MRPL11;locus_tag=YDL202W;note=Mrpl11p;experiment=experimental evidence%2C no additional details recorded;product=Mitochondrial ribosomal protein of the large subunit;protein_id=NP_010079.1;db_x
chr04	0.915748	0.826581	99562	+	ID=NC_001136.8:TRM8:unknown_transcript_1;Parent=NC_001136.8:TRM8;locus_tag=YDL201W;note=Trm8p;experiment=experimental evidence%2C no additional details recorded;product=Subunit of a tRNA methyltransferase complex composed of Trm8p and Trm82p that catalyze
chr04	0.829208	0.844783	101068	-	ID=NC_001136.8:MGT1:unknown_transcript_1;Parent=NC_001136.8:MGT1;locus_tag=YDL200C;EC_number=2.1.1.63;note=Mgt1p;experiment=experimental evidence%2C no additional details recorded;product=DNA repair methyltransferase %286-O-methylguanine-DNA methylase%29
chr04	0.75601	0.929791	103354	-	locus_tag=YDL199C;note=Ydl199cp;inference=non-experimental evidence%2C no additional details recorded;product=Putative transporter%2C member of the sugar porter family;protein_id=NP_010082.1;db_xref=SGD:S000002358;db_xref=GI:6320002;db_xref=GeneID:851328;
chr04	0.78325	0.819623	104552	-	ID=NC_001136.8:GGC1:unknown_transcript_1;Parent=NC_001136.8:GGC1;locus_tag=YDL198C;gene_synonym=YHM1;note=Mitochondrial GTP%2FGDP transporter%2C essential for mitochondrial genome maintenance%3B has a role in mitochondrial iron transport%3B member of the
chr04	0.813994	0.835692	106495	-	ID=NC_001136.8:ASF2:unknown_transcript_1;Parent=NC_001136.8:ASF2;locus_tag=YDL197C;note=Asf2p;experiment=experimental evidence%2C no additional details recorded;product=Anti-silencing protein that causes derepression of silent loci when overexpressed;prot
chr04	0.45441	0.659281	107209	+	ID=NC_001136.8:SEC31:unknown_transcript_1;Parent=NC_001136.8:SEC31;locus_tag=YDL195W;gene_synonym=WEB1;note=Sec31p;experiment=experimental evidence%2C no additional details recorded;product=Essential phosphoprotein component %28p150%29 of the COPII coat o
chr04	0.928782	0.972751	111581	+	ID=NC_001136.8:SNF3:unknown_transcript_1;Parent=NC_001136.8:SNF3;locus_tag=YDL194W;note=Snf3p;experiment=experimental evidence%2C no additional details recorded;product=Plasma membrane glucose sensor that regulates glucose transport%3B has 12 predicted tr
chr04	0.922988	0.925442	114673	+	ID=NC_001136.8:NUS1:unknown_transcript_1;Parent=NC_001136.8:NUS1;locus_tag=YDL193W;note=Prenyltransferase%2C required for cell viability%3B involved in protein trafficking;experiment=experimental evidence%2C no additional details recorded;product=Nus1p;pr
chr04	0.913483	0.94941	116322	+	ID=NC_001136.8:ARF1:unknown_transcript_1;Parent=NC_001136.8:ARF1;locus_tag=YDL192W;note=Arf1p;experiment=experimental evidence%2C no additional details recorded;product=ADP-ribosylation factor%2C GTPase of the Ras superfamily involved in regulation of coa
chr04	0.54574	0.774517	117665	+	ID=NC_001136.8:RPL35A:unknown_transcript_1;Parent=NC_001136.8:RPL35A;locus_tag=YDL191W;gene_synonym=SOS1;note=Rpl35ap;experiment=experimental evidence%2C no additional details recorded;product=Protein component of the large %2860S%29 ribosomal subunit%2C
chr04	0.940025	0.973102	121593	-	ID=NC_001136.8:UFD2:unknown_transcript_1;Parent=NC_001136.8:UFD2;locus_tag=YDL190C;note=Ufd2p;experiment=experimental evidence%2C no additional details recorded;product=Ubiquitin chain assembly factor %28E4%29 that cooperates with a ubiquitin-activating e
chr04	0.965815	0.985612	122217	+	ID=NC_001136.8:RBS1:unknown_transcript_1;Parent=NC_001136.8:RBS1;locus_tag=YDL189W;note=Rbs1p;experiment=experimental evidence%2C no additional details recorded;product=Protein of unknown function%2C identified as a high copy suppressor of psk1 psk2 mutat
chr04	0.927259	0.971208	124999	-	ID=NC_001136.8:PPH22:unknown_transcript_1;Parent=NC_001136.8:PPH22;locus_tag=YDL188C;gene_synonym=PPH2;EC_number=3.1.3.16;note=Pph22p;experiment=experimental evidence%2C no additional details recorded;product=Catalytic subunit of protein phosphatase 2A%2C
chr04	0.934789	0.97328	125617	+	locus_tag=YDL186W;note=Ydl186wp;inference=non-experimental evidence%2C no additional details recorded;product=Putative protein of unknown function%3B YDL186W is not an essential gene;protein_id=NP_010095.1;db_xref=SGD:S000002345;db_xref=GI:6320014;db_xref
chr04	0.935267	0.983051	126788	+	ID=NC_001136.8:TFP1:unknown_transcript_1;Parent=NC_001136.8:TFP1;locus_tag=YDL185W;gene_synonym=VMA1;gene_synonym=CLS8;EC_number=3.6.3.14;note=Vacuolar ATPase V1 domain subunit A containing the catalytic nucleotide binding sites%3B protein precursor under
chr04	0.815579	0.772305	130485	-	ID=NC_001136.8:RPL41A:unknown_transcript_1;Parent=NC_001136.8:RPL41A;locus_tag=YDL184C;gene_synonym=RPL47A;note=Rpl41ap;experiment=experimental evidence%2C no additional details recorded;product=Ribosomal protein L47 of the large %2860S%29 ribosomal subun
chr04	0.816968	0.904759	131834	-	locus_tag=YDL183C;note=Ydl183cp;inference=non-experimental evidence%2C no additional details recorded;product=Putative protein of unknown function%3B YDL183C is not an essential gene;protein_id=NP_010098.1;db_xref=SGD:S000002342;db_xref=GI:6320018;db_xref
chr04	0.483128	0.735508	133438	+	ID=NC_001136.8:LYS20:unknown_transcript_1;Parent=NC_001136.8:LYS20;locus_tag=YDL182W;EC_number=2.3.3.14;note=Lys20p;experiment=experimental evidence%2C no additional details recorded;product=Homocitrate synthase isozyme%2C catalyzes the condensation of ac
chr04	0.482556	0.928072	135180	+	ID=NC_001136.8:INH1:unknown_transcript_1;Parent=NC_001136.8:INH1;locus_tag=YDL181W;note=Protein that inhibits ATP hydrolysis by the F1F0-ATP synthase%2C inhibitory function is enhanced by stabilizing proteins Stf1p and Stf2p%3B has similarity to Stf1p and
chr04	0.565639	0.887303	135897	+	locus_tag=YDL180W;note=Ydl180wp;inference=non-experimental evidence%2C no additional details recorded;product=Putative protein of unknown function%3B green fluorescent protein %28GFP%29-fusion protein localizes to the vacuole;protein_id=NP_010101.1;db_xre
chr04	0.928819	0.968657	138292	+	ID=NC_001136.8:PCL9:unknown_transcript_1;Parent=NC_001136.8:PCL9;locus_tag=YDL179W;note=Pcl9p;experiment=experimental evidence%2C no additional details recorded;product=Cyclin%2C forms a functional kinase complex with Pho85p cyclin-dependent kinase %28Cdk
chr04	0.656391	0.875653	139523	+	ID=NC_001136.8:DLD2:unknown_transcript_1;Parent=NC_001136.8:DLD2;locus_tag=YDL178W;gene_synonym=AIP2;note=Dld2p;experiment=experimental evidence%2C no additional details recorded;product=D-lactate dehydrogenase%2C located in the mitochondrial matrix;prote
chr04	0.759828	0.852507	141722	-	locus_tag=YDL177C;note=Ydl177cp;inference=non-experimental evidence%2C no additional details recorded;product=Putative protein of unknown function%3B similar to the mouse IMPACT gene%3B YDL177C is not an essential gene;protein_id=NP_010104.1;db_xref=SGD:S
chr04	0.882465	0.867089	142098	+	locus_tag=YDL176W;note=Ydl176wp;inference=non-experimental evidence%2C no additional details recorded;product=Putative protein of unknown function%3B YDL176W is not an essential gene;protein_id=NP_010105.1;db_xref=SGD:S000002335;db_xref=GI:6320025;db_xref
chr04	0.657302	0.845224	145519	-	ID=NC_001136.8:AIR2:unknown_transcript_1;Parent=NC_001136.8:AIR2;locus_tag=YDL175C;note=RING finger protein that interacts with the arginine methyltransferase Hmt1p%3B may regulate methylation of Npl3p%2C which modulates Npl3p function in mRNA processing
chr04	0.956216	0.953787	147590	-	ID=NC_001136.8:DLD1:unknown_transcript_1;Parent=NC_001136.8:DLD1;locus_tag=YDL174C;EC_number=1.1.2.4;note=Dld1p;experiment=experimental evidence%2C no additional details recorded;product=D-lactate dehydrogenase%2C oxidizes D-lactate to pyruvate%2C transcr
chr04	0.916539	0.934808	148192	+	locus_tag=YDL173W;note=Ydl173wp;inference=non-experimental evidence%2C no additional details recorded;product=Putative protein of unknown function%3B green fluorescent protein %28GFP%29-fusion protein localizes to the cytoplasm%3B YDL173W is not an essent
chr04	0.802853	0.731743	155641	-	ID=NC_001136.8:GLT1:unknown_transcript_1;Parent=NC_001136.8:GLT1;locus_tag=YDL171C;EC_number=1.4.1.13;note=NAD%28%2B%29-dependent glutamate synthase %28GOGAT%29%2C synthesizes glutamate from glutamine and alpha-ketoglutarate%3B with Gln1p%2C forms the sec
chr04	0.589656	0.72106	156319	+	ID=NC_001136.8:UGA3:unknown_transcript_1;Parent=NC_001136.8:UGA3;locus_tag=YDL170W;note=Uga3p;experiment=experimental evidence%2C no additional details recorded;product=Transcriptional activator necessary for gamma-aminobutyrate %28GABA%29-dependent induc
chr04	0.945464	0.980564	158736	-	ID=NC_001136.8:UGX2:unknown_transcript_1;Parent=NC_001136.8:UGX2;locus_tag=YDL169C;note=Ugx2p;experiment=experimental evidence%2C no additional details recorded;product=Protein of unknown function%2C transcript accumulates in response to any combination o
chr04	0.751823	0.894191	159605	+	ID=NC_001136.8:SFA1:unknown_transcript_1;Parent=NC_001136.8:SFA1;locus_tag=YDL168W;gene_synonym=ADH5;EC_number=1.1.1.1;note=Sfa1p;experiment=experimental evidence%2C no additional details recorded;product=Bifunctional enzyme containing both alcohol dehydr
chr04	0.885642	0.86242	163155	-	ID=NC_001136.8:NRP1:unknown_transcript_1;Parent=NC_001136.8:NRP1;locus_tag=YDL167C;note=Protein of unknown function%2C rich in asparagine residues;experiment=experimental evidence%2C no additional details recorded;product=Nrp1p;protein_id=NP_010114.1;db_x
chr04	0.526688	0.92916	164043	-	ID=NC_001136.8:FAP7:unknown_transcript_1;Parent=NC_001136.8:FAP7;locus_tag=YDL166C;note=Fap7p;experiment=experimental evidence%2C no additional details recorded;product=Essential NTPase required for small ribosome subunit synthesis%2C mediates processing
chr04	0.878886	0.856766	164291	+	ID=NC_001136.8:CDC36:unknown_transcript_1;Parent=NC_001136.8:CDC36;locus_tag=YDL165W;gene_synonym=NOT2;gene_synonym=DNA19;note=Component of the CCR4-NOT complex%2C which has multiple roles in regulating mRNA levels including regulation of transcription an
chr04	0.918864	0.983267	167255	-	ID=NC_001136.8:CDC9:unknown_transcript_1;Parent=NC_001136.8:CDC9;locus_tag=YDL164C;gene_synonym=MMS8;EC_number=6.5.1.1;note=DNA ligase found in the nucleus and mitochondria%2C an essential enzyme that joins Okazaki fragments during DNA replication%3B also
chr04	0.795513	0.944027	167715	+	ID=NC_001136.8:ENT1:unknown_transcript_1;Parent=NC_001136.8:ENT1;locus_tag=YDL161W;note=Epsin-like protein involved in endocytosis and actin patch assembly and functionally redundant with Ent2p%3B binds clathrin via a clathrin-binding domain motif at C-te
chr04	0.720103	0.653685	169609	-	locus_tag=YDL160C-A;note=Ydl160c-ap;inference=non-experimental evidence%2C no additional details recorded;product=Putative protein of unknown function;protein_id=NP_878060.1;db_xref=SGD:S000028520;db_xref=GI:33438778;db_xref=GeneID:1466431;exon_number=1
chr04	0.857476	0.940395	171931	-	ID=NC_001136.8:DHH1:unknown_transcript_1;Parent=NC_001136.8:DHH1;locus_tag=YDL160C;note=Dhh1p;experiment=experimental evidence%2C no additional details recorded;product=Cytoplasmic DExD%2FH-box helicase%2C stimulates mRNA decapping%2C coordinates distinct
chr04	0.188167	0.59874	172183	+	locus_tag=YDL159W-A;gene_synonym=YDL159W-B;note=Ydl159w-ap;inference=non-experimental evidence%2C no additional details recorded;product=Putative protein of unknown function%3B identified by sequence comparison with hemiascomycetous yeast species;protein_
chr04	0.290272	0.511719	172482	+	ID=NC_001136.8:STE7:unknown_transcript_1;Parent=NC_001136.8:STE7;locus_tag=YDL159W;EC_number=2.7.1.-;note=Ste7p;experiment=experimental evidence%2C no additional details recorded;product=Signal transducing MAP kinase kinase involved in pheromone response%
chr04	0.858017	0.807821	174589	-	locus_tag=YDL157C;note=Ydl157cp;inference=non-experimental evidence%2C no additional details recorded;product=Putative protein of unknown function%3B the authentic%2C non-tagged protein is detected in highly purified mitochondria in high-throughput studie
chr04	0.780322	0.730241	174919	+	locus_tag=YDL156W;note=Ydl156wp;inference=non-experimental evidence%2C no additional details recorded;product=Putative protein of unknown function%3B protein sequence contains three WD domains %28WD-40 repeat%29%3B green fluorescent protein %28GFP%29-fusi
chr04	0.870822	0.971838	176774	+	ID=NC_001136.8:CLB3:unknown_transcript_1;Parent=NC_001136.8:CLB3;locus_tag=YDL155W;note=Clb3p;experiment=experimental evidence%2C no additional details recorded;product=B-type cyclin involved in cell cycle progression%3B activates Cdc28p to promote the G2
chr04	0.876804	0.836731	178335	+	ID=NC_001136.8:MSH5:unknown_transcript_1;Parent=NC_001136.8:MSH5;locus_tag=YDL154W;note=Protein of the MutS family%2C forms a dimer with Msh4p that facilitates crossovers between homologs during meiosis%3B msh5-Y823H mutation confers tolerance to DNA alky
chr04	0.738843	0.937912	183019	-	ID=NC_001136.8:SAS10:unknown_transcript_1;Parent=NC_001136.8:SAS10;locus_tag=YDL153C;gene_synonym=UTP3;note=Sas10p;experiment=experimental evidence%2C no additional details recorded;product=Component of the small %28ribosomal%29 subunit %28SSU%29 processo
chr04	0.835394	0.946601	183344	+	ID=NC_001136.8:RPC53:unknown_transcript_1;Parent=NC_001136.8:RPC53;locus_tag=YDL150W;gene_synonym=RPC4;EC_number=2.7.7.6;note=Rpc53p;experiment=experimental evidence%2C no additional details recorded;product=RNA polymerase III subunit C53;protein_id=NP_01
chr04	0.728261	0.913412	184926	+	ID=NC_001136.8:ATG9:unknown_transcript_1;Parent=NC_001136.8:ATG9;locus_tag=YDL149W;gene_synonym=APG9;gene_synonym=CVT7;gene_synonym=AUT9;note=Transmembrane protein involved in formation of Cvt and autophagic vesicles%3B cycles between the pre-autophagosom
chr04	0.681386	0.913136	190587	-	ID=NC_001136.8:NOP14:unknown_transcript_1;Parent=NC_001136.8:NOP14;locus_tag=YDL148C;gene_synonym=UTP2;note=Nucleolar protein%2C forms a complex with Noc4p that mediates maturation and nuclear export of 40S ribosomal subunits%3B also present in the small
chr04	0.971755	0.950911	190925	+	ID=NC_001136.8:RPN5:unknown_transcript_1;Parent=NC_001136.8:RPN5;locus_tag=YDL147W;gene_synonym=NAS5;note=Rpn5p;experiment=experimental evidence%2C no additional details recorded;product=Essential%2C non-ATPase regulatory subunit of the 26S proteasome lid
chr04	0.894498	0.937403	192751	+	ID=NC_001136.8:LDB17:unknown_transcript_1;Parent=NC_001136.8:LDB17;locus_tag=YDL146W;note=Protein of unknown function%3B GFP-fusion protein localizes to the cell periphery%2C cytoplasm%2C bud%2C and bud neck%3B null mutant shows a reduced affinity for the
chr04	0.928072	0.967126	198177	-	ID=NC_001136.8:COP1:unknown_transcript_1;Parent=NC_001136.8:COP1;locus_tag=YDL145C;gene_synonym=SOO1;gene_synonym=RET1;gene_synonym=SEC33;note=Cop1p;experiment=experimental evidence%2C no additional details recorded;product=Alpha subunit of COPI vesicle c
chr04	0.925637	0.951726	199733	-	locus_tag=YDL144C;note=Ydl144cp;inference=non-experimental evidence%2C no additional details recorded;product=Putative protein of unknown function%3B green fluorescent protein %28GFP%29-fusion protein localizes to the cytoplasm and nucleus%3B YDL144C is n
chr04	0.664971	0.92537	199997	+	ID=NC_001136.8:CCT4:unknown_transcript_1;Parent=NC_001136.8:CCT4;locus_tag=YDL143W;gene_synonym=ANC2;gene_synonym=TCP4;note=Subunit of the cytosolic chaperonin Cct ring complex%2C related to Tcp1p%2C required for the assembly of actin and tubulins in vivo
chr04	0.840185	0.960502	202571	-	ID=NC_001136.8:CRD1:unknown_transcript_1;Parent=NC_001136.8:CRD1;locus_tag=YDL142C;gene_synonym=CLS1;note=Crd1p;experiment=experimental evidence%2C no additional details recorded;product=Cardiolipin synthase%3B produces cardiolipin%2C which is an importan
chr04	0.928252	0.846329	203040	+	ID=NC_001136.8:BPL1:unknown_transcript_1;Parent=NC_001136.8:BPL1;locus_tag=YDL141W;gene_synonym=ACC2;EC_number=6.3.4.-;note=Bpl1p;experiment=experimental evidence%2C no additional details recorded;product=Biotin:apoprotein ligase%2C covalently modifies pr
chr04	0.655641	0.631263	210562	-	ID=NC_001136.8:RPO21:unknown_transcript_1;Parent=NC_001136.8:RPO21;locus_tag=YDL140C;gene_synonym=SUA8;gene_synonym=RPB220;gene_synonym=RPB1;EC_number=2.7.7.6;note=Rpo21p;experiment=experimental evidence%2C no additional details recorded;product=RNA polym
chr04	0.769245	0.964105	212047	-	ID=NC_001136.8:SCM3:unknown_transcript_1;Parent=NC_001136.8:SCM3;locus_tag=YDL139C;note=Scm3p;experiment=experimental evidence%2C no additional details recorded;product=Nonhistone component of centromeric chromatin that binds stoichiometrically to CenH3-H
chr04	0.932538	0.988695	213352	+	ID=NC_001136.8:RGT2:unknown_transcript_1;Parent=NC_001136.8:RGT2;locus_tag=YDL138W;note=Rgt2p;experiment=experimental evidence%2C no additional details recorded;product=Plasma membrane glucose receptor%2C highly similar to Snf3p%3B both Rgt2p and Snf3p se
chr04	0.611593	0.719662	216529	+	ID=NC_001136.8:ARF2:unknown_transcript_1;Parent=NC_001136.8:ARF2;locus_tag=YDL137W;note=Arf2p;experiment=experimental evidence%2C no additional details recorded;product=ADP-ribosylation factor%2C GTPase of the Ras superfamily involved in regulation of coa
chr04	0.866733	0.902111	217600	+	ID=NC_001136.8:RPL35B:unknown_transcript_1;Parent=NC_001136.8:RPL35B;locus_tag=YDL136W;gene_synonym=SOS2;note=Rpl35bp;experiment=experimental evidence%2C no additional details recorded;product=Protein component of the large %2860S%29 ribosomal subunit%2C
chr04	0.934329	0.907123	219288	-	ID=NC_001136.8:RDI1:unknown_transcript_1;Parent=NC_001136.8:RDI1;locus_tag=YDL135C;note=Rho GDP dissociation inhibitor involved in the localization and regulation of Cdc42p;experiment=experimental evidence%2C no additional details recorded;product=Rdi1p;p
chr04	0.709417	0.743143	220771	-	ID=NC_001136.8:PPH21:unknown_transcript_1;Parent=NC_001136.8:PPH21;locus_tag=YDL134C;gene_synonym=PPH1;EC_number=3.1.3.16;note=Pph21p;experiment=experimental evidence%2C no additional details recorded;product=Catalytic subunit of protein phosphatase 2A%2C
chr04	0.538998	0.476029	221801	-	ID=NC_001136.8:RPL41B:unknown_transcript_1;Parent=NC_001136.8:RPL41B;locus_tag=YDL133C-A;gene_synonym=YDL134C-A;gene_synonym=RPL47B;note=Rpl41bp;experiment=experimental evidence%2C no additional details recorded;product=Ribosomal protein L47 of the large
chr04	0.702134	0.710309	222427	+	locus_tag=YDL133W;note=Ydl133wp;inference=non-experimental evidence%2C no additional details recorded;product=Putative protein of unknown function;protein_id=NP_010149.1;db_xref=SGD:S000002291;db_xref=GI:6320069;db_xref=GeneID:851423;exon_number=1
chr04	0.82287	0.648158	224304	+	ID=NC_001136.8:CDC53:unknown_transcript_1;Parent=NC_001136.8:CDC53;locus_tag=YDL132W;note=Cullin%2C structural protein of SCF complexes %28which also contain Skp1p%2C Cdc34p%2C Hrt1p and an F-box protein%29 involved in ubiquitination%3B SCF promotes the G
chr04	0.649308	0.825726	227393	+	ID=NC_001136.8:LYS21:unknown_transcript_1;Parent=NC_001136.8:LYS21;locus_tag=YDL131W;EC_number=2.3.3.14;note=Lys21p;experiment=experimental evidence%2C no additional details recorded;product=Homocitrate synthase isozyme%2C catalyzes the condensation of ac
chr04	0.822072	0.957758	229171	+	ID=NC_001136.8:STF1:unknown_transcript_1;Parent=NC_001136.8:STF1;locus_tag=YDL130W-A;gene_synonym=AIS2;note=Stf1p;experiment=experimental evidence%2C no additional details recorded;product=Protein involved in regulation of the mitochondrial F1F0-ATP synth
chr04	0.768089	0.956679	229906	+	ID=NC_001136.8:RPP1B:unknown_transcript_1;Parent=NC_001136.8:RPP1B;locus_tag=YDL130W;gene_synonym=RPLA3;gene_synonym=RPL44%27;note=Rpp1bp;experiment=experimental evidence%2C no additional details recorded;product=Ribosomal protein P1 beta%2C component of
chr04	0.556406	0.822484	231024	+	locus_tag=YDL129W;note=Ydl129wp;inference=non-experimental evidence%2C no additional details recorded;product=Putative protein of unknown function%3B green fluorescent protein %28GFP%29-fusion protein localizes to the cytoplasm and the nucleus%3B YDL129W
chr04	0.696662	0.899042	232652	+	ID=NC_001136.8:VCX1:unknown_transcript_1;Parent=NC_001136.8:VCX1;locus_tag=YDL128W;gene_synonym=MNR1;gene_synonym=HUM1;note=Vcx1p;experiment=experimental evidence%2C no additional details recorded;product=Vacuolar H%2B%2FCa2%2B exchanger involved in contr
chr04	0.647081	0.644893	234927	+	ID=NC_001136.8:PCL2:unknown_transcript_1;Parent=NC_001136.8:PCL2;locus_tag=YDL127W;gene_synonym=CLN4;note=Pcl2p;experiment=experimental evidence%2C no additional details recorded;product=G1 cyclin%2C associates with Pho85p cyclin-dependent kinase %28Cdk%2
chr04	0.936292	0.877362	238664	-	ID=NC_001136.8:CDC48:unknown_transcript_1;Parent=NC_001136.8:CDC48;locus_tag=YDL126C;note=Cdc48p;experiment=experimental evidence%2C no additional details recorded;product=ATPase in ER%2C nuclear membrane and cytosol with homology to mammalian p97%3B in a
chr04	0.810848	0.837864	239606	-	ID=NC_001136.8:HNT1:unknown_transcript_1;Parent=NC_001136.8:HNT1;locus_tag=YDL125C;note=Hnt1p;experiment=experimental evidence%2C no additional details recorded;product=Adenosine 5%27-monophosphoramidase%3B interacts physically and genetically with Kin28p
chr04	0.740286	0.787804	240259	+	locus_tag=YDL124W;note=Ydl124wp;inference=non-experimental evidence%2C no additional details recorded;product=NADPH-dependent alpha-keto amide reductase%3B reduces aromatic alpha-keto amides%2C aliphatic alpha-keto esters%2C and aromatic alpha-keto esters
chr04	0.575437	0.817558	241418	+	ID=NC_001136.8:SNA4:unknown_transcript_1;Parent=NC_001136.8:SNA4;locus_tag=YDL123W;note=Sna4p;experiment=experimental evidence%2C no additional details recorded;product=Protein of unknown function%2C localized to the vacuolar outer membrane;protein_id=NP_
chr04	0.877376	0.825429	242552	+	ID=NC_001136.8:UBP1:unknown_transcript_1;Parent=NC_001136.8:UBP1;locus_tag=YDL122W;EC_number=3.1.2.15;note=Ubp1p;experiment=experimental evidence%2C no additional details recorded;product=Ubiquitin-specific protease that removes ubiquitin from ubiquitinat
chr04	0.781356	0.777897	245582	-	locus_tag=YDL121C;note=Ydl121cp;inference=non-experimental evidence%2C no additional details recorded;product=Putative protein of unknown function%3B green fluorescent protein %28GFP%29-fusion protein localizes to the endoplasmic retiuculum%3B YDL121C is
chr04	0.246245	0.756087	245923	+	ID=NC_001136.8:YFH1:unknown_transcript_1;Parent=NC_001136.8:YFH1;locus_tag=YDL120W;note=Yfh1p;experiment=experimental evidence%2C no additional details recorded;product=Frataxin%2C regulates mitochondrial iron accumulation%3B interacts with Isu1p which pr
chr04	0.842301	0.90747	247302	+	locus_tag=YDL118W;note=Ydl118wp;inference=non-experimental evidence%2C no additional details recorded;product=Non-essential protein of unconfirmed function%3B mutants are defective in telomere maintenance%2C and are synthetically sick or lethal with alpha
chr04	0.812799	0.917075	247612	-	locus_tag=YDL119C;note=Ydl119cp;inference=non-experimental evidence%2C no additional details recorded;product=Putative mitochondrial transport protein%3B GFP-fusion protein is induced in response to the DNA-damaging agent MMS%3B the authentic%2C non-tagge
chr04	0.809791	0.90669	248581	+	ID=NC_001136.8:CYK3:unknown_transcript_1;Parent=NC_001136.8:CYK3;locus_tag=YDL117W;note=SH3-domain protein located in the mother-bud neck and the cytokinetic actin ring%3B mutant phenotype and genetic interactions suggest a role in cytokinesis;experiment=
chr04	0.965936	0.97638	251566	+	ID=NC_001136.8:NUP84:unknown_transcript_1;Parent=NC_001136.8:NUP84;locus_tag=YDL116W;note=Subunit of the nuclear pore complex %28NPC%29%2C forms a subcomplex with Nup85p%2C Nup120p%2C Nup145p-C%2C Sec13p%2C and Seh1p that plays a role in nuclear mRNA expo
chr04	0.958328	0.929851	255126	-	ID=NC_001136.8:IWR1:unknown_transcript_1;Parent=NC_001136.8:IWR1;locus_tag=YDL115C;note=Protein of unknown function%2C deletion causes hypersensitivity to the K1 killer toxin;experiment=experimental evidence%2C no additional details recorded;product=Iwr1p
chr04	0.908982	0.960227	255604	+	locus_tag=YDL114W;note=Ydl114wp;inference=non-experimental evidence%2C no additional details recorded;product=Putative protein of unknown function with similarity to acyl-carrier-protein reductases%3B YDL114W is not an essential gene;protein_id=NP_010169.
chr04	0.615082	0.91667	258555	-	ID=NC_001136.8:ATG20:unknown_transcript_1;Parent=NC_001136.8:ATG20;locus_tag=YDL113C;gene_synonym=CVT20;gene_synonym=SNX42;note=Protein required for transport of aminopeptidase I %28Lap4p%29 through the cytoplasm-to-vacuole targeting pathway%3B binds phos
chr04	0.742479	0.978537	258915	+	ID=NC_001136.8:TRM3:unknown_transcript_1;Parent=NC_001136.8:TRM3;locus_tag=YDL112W;note=Trm3p;experiment=experimental evidence%2C no additional details recorded;product=2%27-O-ribose methyltransferase%2C catalyzes the ribose methylation of the guanosine n
chr04	0.965511	0.910115	264110	-	ID=NC_001136.8:RRP42:unknown_transcript_1;Parent=NC_001136.8:RRP42;locus_tag=YDL111C;note=Rrp42p;experiment=experimental evidence%2C no additional details recorded;product=Protein involved in rRNA processing%3B component of the exosome 3-%3E5 exonuclease
chr04	0.974238	0.972952	264964	-	ID=NC_001136.8:TMA17:unknown_transcript_1;Parent=NC_001136.8:TMA17;locus_tag=YDL110C;note=Tma17p;experiment=experimental evidence%2C no additional details recorded;product=Protein of unknown function that associates with ribosomes;protein_id=NP_010173.1;d
chr04	0.899749	0.901744	267201	-	locus_tag=YDL109C;note=Ydl109cp;inference=non-experimental evidence%2C no additional details recorded;product=Putative lipase%3B involved in lipid metabolism%3B YDL109C is not an essential gene;protein_id=NP_010174.1;db_xref=SGD:S000002267;db_xref=GI:6320
chr04	0.946718	0.925676	267698	+	ID=NC_001136.8:KIN28:unknown_transcript_1;Parent=NC_001136.8:KIN28;locus_tag=YDL108W;EC_number=2.7.1.-;note=Serine%2Fthreonine protein kinase%2C subunit of the transcription factor TFIIH%3B involved in transcription initiation at RNA polymerase II promote
chr04	0.79924	0.894962	268921	+	ID=NC_001136.8:MSS2:unknown_transcript_1;Parent=NC_001136.8:MSS2;locus_tag=YDL107W;note=Peripherally bound inner membrane protein of the mitochondrial matrix involved in membrane insertion of C-terminus of Cox2p%2C interacts genetically and physically wit
chr04	0.913285	0.987048	271901	-	ID=NC_001136.8:PHO2:unknown_transcript_1;Parent=NC_001136.8:PHO2;locus_tag=YDL106C;gene_synonym=GRF10;gene_synonym=BAS2;note=Pho2p;experiment=experimental evidence%2C no additional details recorded;product=Homeobox transcription factor%3B regulatory targe
chr04	0.86933	0.922692	272389	+	ID=NC_001136.8:NSE4:unknown_transcript_1;Parent=NC_001136.8:NSE4;locus_tag=YDL105W;gene_synonym=QRI2;note=Nuclear protein that plays a role in the function of the Smc5p-Rhc18p complex;experiment=experimental evidence%2C no additional details recorded;prod
chr04	0.373934	0.849904	274876	-	ID=NC_001136.8:QRI7:unknown_transcript_1;Parent=NC_001136.8:QRI7;locus_tag=YDL104C;EC_number=3.4.24.-;note=Qri7p;experiment=experimental evidence%2C no additional details recorded;product=Putative metalloprotease%2C similar to O-sialoglycoprotein metallop
chr04	0.71869	0.877567	276581	-	ID=NC_001136.8:QRI1:unknown_transcript_1;Parent=NC_001136.8:QRI1;locus_tag=YDL103C;gene_synonym=UAP1;note=UDP-N-acetylglucosamine pyrophosphorylase%2C catalyzes the formation of UDP-N-acetylglucosamine %28UDP-GlcNAc%29%2C which is important in cell wall b
chr04	0.957787	0.980123	276872	+	ID=NC_001136.8:POL3:unknown_transcript_1;Parent=NC_001136.8:POL3;locus_tag=YDL102W;gene_synonym=CDC2;gene_synonym=TEX1;gene_synonym=HPR6;EC_number=2.7.7.7;note=Pol3p;experiment=experimental evidence%2C no additional details recorded;product=Catalytic subu
chr04	0.881113	0.952781	281848	-	ID=NC_001136.8:DUN1:unknown_transcript_1;Parent=NC_001136.8:DUN1;locus_tag=YDL101C;EC_number=2.7.1.-;note=Dun1p;experiment=experimental evidence%2C no additional details recorded;product=Cell-cycle checkpoint serine-threonine kinase required for DNA damag
chr04	0.928085	0.924288	283176	-	ID=NC_001136.8:GET3:unknown_transcript_1;Parent=NC_001136.8:GET3;locus_tag=YDL100C;gene_synonym=ARR4;note=Get3p;experiment=experimental evidence%2C no additional details recorded;product=ATPase%2C subunit of the GET complex%3B required for the retrieval o
chr04	0.903209	0.840909	283419	+	ID=NC_001136.8:BUG1:unknown_transcript_1;Parent=NC_001136.8:BUG1;locus_tag=YDL099W;note=Cis-golgi localized protein involved in ER to Golgi transport%3B forms a complex with the mammalian GRASP65 homolog%2C Grh1p%3B mutants are compromised for the fusion
chr04	0.902493	0.842479	285165	-	ID=NC_001136.8:SNU23:unknown_transcript_1;Parent=NC_001136.8:SNU23;locus_tag=YDL098C;note=Snu23p;experiment=experimental evidence%2C no additional details recorded;product=Component of U4%2FU6.U5 snRNP involved in mRNA splicing via spliceosome;protein_id=
chr04	0.879455	0.973853	286695	-	ID=NC_001136.8:RPN6:unknown_transcript_1;Parent=NC_001136.8:RPN6;locus_tag=YDL097C;gene_synonym=NAS4;note=Rpn6p;experiment=experimental evidence%2C no additional details recorded;product=Essential%2C non-ATPase regulatory subunit of the 26S proteasome lid
chr04	0.832	0.971309	287059	+	ID=NC_001136.8:PMT1:unknown_transcript_1;Parent=NC_001136.8:PMT1;locus_tag=YDL095W;EC_number=2.4.1.109;note=Protein O-mannosyltransferase%2C transfers mannose residues from dolichyl phosphate-D-mannose to protein serine%2Fthreonine residues%3B acts in a c
chr04	0.748877	0.855014	289909	+	ID=NC_001136.8:PMT5:unknown_transcript_1;Parent=NC_001136.8:PMT5;locus_tag=YDL093W;EC_number=2.4.1.109;note=Protein O-mannosyltransferase%2C transfers mannose residues from dolichyl phosphate-D-mannose to protein serine%2Fthreonine residues%3B acts in a c
chr04	0.781605	0.799637	292781	+	ID=NC_001136.8:SRP14:unknown_transcript_1;Parent=NC_001136.8:SRP14;locus_tag=YDL092W;note=Srp14p;experiment=experimental evidence%2C no additional details recorded;product=Signal recognition particle %28SRP%29 subunit%2C interacts with the RNA component o
chr04	0.596435	0.853857	294759	-	ID=NC_001136.8:UBX3:unknown_transcript_1;Parent=NC_001136.8:UBX3;locus_tag=YDL091C;note=Ubx3p;experiment=experimental evidence%2C no additional details recorded;product=UBX %28ubiquitin regulatory X%29 domain-containing protein that interacts with Cdc48p%
chr04	0.842712	0.953898	296329	-	ID=NC_001136.8:RAM1:unknown_transcript_1;Parent=NC_001136.8:RAM1;locus_tag=YDL090C;gene_synonym=STE16;gene_synonym=SGP2;gene_synonym=SCG2;gene_synonym=FUS8;gene_synonym=DPR1;EC_number=2.5.1.-;note=Ram1p;experiment=experimental evidence%2C no additional de
chr04	0.889111	0.924962	296820	+	locus_tag=YDL089W;note=Ydl089wp;inference=non-experimental evidence%2C no additional details recorded;product=Protein of unknown function%3B interacts with meiotic division protein Csm1p%3B green fluorescent protein %28GFP%29-fusion protein localizes to t
chr04	0.906813	0.883251	300003	-	ID=NC_001136.8:ASM4:unknown_transcript_1;Parent=NC_001136.8:ASM4;locus_tag=YDL088C;gene_synonym=NUP59;note=Nuclear pore complex subunit%2C part of a subcomplex also containing Nup53p%2C Nup170p%2C and Pse1p;experiment=experimental evidence%2C no additiona
chr04	0.759671	0.923642	300999	-	ID=NC_001136.8:LUC7:unknown_transcript_1;Parent=NC_001136.8:LUC7;locus_tag=YDL087C;gene_synonym=EPE1;gene_synonym=EXM2;note=Luc7p;experiment=experimental evidence%2C no additional details recorded;product=Essential protein associated with the U1 snRNP com
chr04	0.917351	0.938022	301413	+	locus_tag=YDL086W;EC_number=3.1.1.45;note=Ydl086wp;inference=non-experimental evidence%2C no additional details recorded;product=Putative protein of unknown function%3B the authentic%2C non-tagged protein is detected in highly purified mitochondria in hig
chr04	0.93281	0.965896	302670	-	locus_tag=YDL085C-A;note=Ydl085c-ap;inference=non-experimental evidence%2C no additional details recorded;product=Putative protein of unknown function%3B green fluorescent protein %28GFP%29-fusion protein localizes to the cytoplasm and nucleus;protein_id=
chr04	0.978879	0.96015	303211	+	ID=NC_001136.8:NDE2:unknown_transcript_1;Parent=NC_001136.8:NDE2;locus_tag=YDL085W;gene_synonym=NDH2;note=Nde2p;experiment=experimental evidence%2C no additional details recorded;product=Mitochondrial external NADH dehydrogenase%2C catalyzes the oxidation
chr04	0.786121	0.947987	305237	+	ID=NC_001136.8:SUB2:unknown_transcript_1;Parent=NC_001136.8:SUB2;locus_tag=YDL084W;note=Sub2p;experiment=experimental evidence%2C no additional details recorded;product=Component of the TREX complex required for nuclear mRNA export%3B member of the DEAD-b
chr04	0.93984	0.944504	307789	-	ID=NC_001136.8:RPS16B:unknown_transcript_1;Parent=NC_001136.8:RPS16B;locus_tag=YDL083C;note=Rps16bp;experiment=experimental evidence%2C no additional details recorded;product=Protein component of the small %2840S%29 ribosomal subunit%3B identical to Rps16
chr04	0.877719	0.952433	308424	+	ID=NC_001136.8:RPL13A:unknown_transcript_1;Parent=NC_001136.8:RPL13A;locus_tag=YDL082W;note=Rpl13ap;experiment=experimental evidence%2C no additional details recorded;product=Protein component of the large %2860S%29 ribosomal subunit%2C nearly identical t
chr04	0.835475	0.9325	310122	-	ID=NC_001136.8:RPP1A:unknown_transcript_1;Parent=NC_001136.8:RPP1A;locus_tag=YDL081C;gene_synonym=RPLA1;note=Rpp1ap;experiment=experimental evidence%2C no additional details recorded;product=Ribosomal stalk protein P1 alpha%2C involved in the interaction
chr04	0.575533	0.857514	312471	-	ID=NC_001136.8:THI3:unknown_transcript_1;Parent=NC_001136.8:THI3;locus_tag=YDL080C;gene_synonym=KID1;note=Thi3p;experiment=experimental evidence%2C no additional details recorded;product=Probable alpha-ketoisocaproate decarboxylase%2C may have a role in c
chr04	0.7683	0.982186	314748	-	ID=NC_001136.8:MRK1:unknown_transcript_1;Parent=NC_001136.8:MRK1;locus_tag=YDL079C;note=Mrk1p;experiment=experimental evidence%2C no additional details recorded;product=Glycogen synthase kinase 3 %28GSK-3%29 homolog%3B one of four GSK-3 homologs in S. cer
chr04	0.922969	0.945243	316388	-	ID=NC_001136.8:MDH3:unknown_transcript_1;Parent=NC_001136.8:MDH3;locus_tag=YDL078C;EC_number=1.1.1.37;note=Peroxisomal malate dehydrogenase%2C catalyzes interconversion of malate and oxaloacetate%3B involved in the glyoxylate cycle;experiment=experimental
chr04	0.858051	0.949664	320120	-	ID=NC_001136.8:VAM6:unknown_transcript_1;Parent=NC_001136.8:VAM6;locus_tag=YDL077C;gene_synonym=VPS39;gene_synonym=VPL22;gene_synonym=VPL18;gene_synonym=CVT4;note=Vam6p;experiment=experimental evidence%2C no additional details recorded;product=Vacuolar pr
chr04	0.752863	0.830716	321552	-	ID=NC_001136.8:RXT3:unknown_transcript_1;Parent=NC_001136.8:RXT3;locus_tag=YDL076C;note=Subunit of the RPD3L complex%3B involved in histone deacetylation;experiment=experimental evidence%2C no additional details recorded;product=Rxt3p;protein_id=NP_010207
chr04	0.934873	0.966562	322226	+	ID=NC_001136.8:RPL31A:unknown_transcript_1;Parent=NC_001136.8:RPL31A;locus_tag=YDL075W;gene_synonym=RPL34;note=Rpl31ap;experiment=experimental evidence%2C no additional details recorded;product=Protein component of the large %2860S%29 ribosomal subunit%2C
chr04	0.835538	0.908547	326149	-	ID=NC_001136.8:BRE1:unknown_transcript_1;Parent=NC_001136.8:BRE1;locus_tag=YDL074C;note=E3 ubiquitin ligase for Rad6p%2C required for the ubiquitination of histone H2B%2C recruitment of Rad6p to promoter chromatin and subsequent methylation of histone H3
chr04	0.838437	0.686147	326613	+	locus_tag=YDL073W;note=Ydl073wp;inference=non-experimental evidence%2C no additional details recorded;product=Putative protein of unknown function%3B YDL073W is not an essential gene;protein_id=NP_010210.1;db_xref=SGD:S000002231;db_xref=GI:6320130;db_xref
chr04	0.927581	0.871802	330447	-	ID=NC_001136.8:YET3:unknown_transcript_1;Parent=NC_001136.8:YET3;locus_tag=YDL072C;note=Yet3p;experiment=experimental evidence%2C no additional details recorded;product=Protein of unknown function%3B YET3 null mutant decreases the level of secreted invert
chr04	0.845208	0.892002	331025	+	ID=NC_001136.8:BDF2:unknown_transcript_1;Parent=NC_001136.8:BDF2;locus_tag=YDL070W;note=Protein involved in transcription initiation at TATA-containing promoters%3B associates with the basal transcription factor TFIID%3B contains two bromodomains%3B corre
chr04	0.919	0.956553	333810	-	ID=NC_001136.8:CBS1:unknown_transcript_1;Parent=NC_001136.8:CBS1;locus_tag=YDL069C;note=Mitochondrial translational activator of the COB mRNA%3B membrane protein that interacts with translating ribosomes%2C acts on the COB mRNA 5%27-untranslated leader;ex
chr04	0.598114	0.869852	334396	-	ID=NC_001136.8:COX9:unknown_transcript_1;Parent=NC_001136.8:COX9;locus_tag=YDL067C;EC_number=1.9.3.1;note=Subunit VIIa of cytochrome c oxidase%2C which is the terminal member of the mitochondrial inner membrane electron transport chain;experiment=experime
chr04	0.93097	0.968117	334835	+	ID=NC_001136.8:IDP1:unknown_transcript_1;Parent=NC_001136.8:IDP1;locus_tag=YDL066W;EC_number=1.1.1.42;note=Mitochondrial NADP-specific isocitrate dehydrogenase%2C catalyzes the oxidation of isocitrate to alpha-ketoglutarate%3B not required for mitochondri
chr04	0.821892	0.941464	337277	-	ID=NC_001136.8:PEX19:unknown_transcript_1;Parent=NC_001136.8:PEX19;locus_tag=YDL065C;gene_synonym=PAS12;note=Pex19p;experiment=experimental evidence%2C no additional details recorded;product=Chaperone and import receptor for newly-synthesized class I pero
chr04	0.839652	0.848817	337487	+	ID=NC_001136.8:UBC9:unknown_transcript_1;Parent=NC_001136.8:UBC9;locus_tag=YDL064W;EC_number=6.3.2.19;note=Ubc9p;experiment=experimental evidence%2C no additional details recorded;product=SUMO-conjugating enzyme involved in the Smt3p conjugation pathway%3
chr04	0.666696	0.862789	340134	-	locus_tag=YDL063C;note=Ydl063cp;inference=non-experimental evidence%2C no additional details recorded;product=Putative protein of unknown function%3B green fluorescent protein %28GFP%29-fusion protein localizes to the cytoplasm and nucleus%3B YDL063C is n
chr04	0.798395	0.92634	340798	-	ID=NC_001136.8:RPS29B:unknown_transcript_1;Parent=NC_001136.8:RPS29B;locus_tag=YDL061C;note=Rps29bp;experiment=experimental evidence%2C no additional details recorded;product=Protein component of the small %2840S%29 ribosomal subunit%3B nearly identical t
chr04	0.763696	0.918114	341619	+	ID=NC_001136.8:TSR1:unknown_transcript_1;Parent=NC_001136.8:TSR1;locus_tag=YDL060W;note=Tsr1p;experiment=experimental evidence%2C no additional details recorded;product=Protein required for processing of 20S pre-rRNA in the cytoplasm%2C associates with pr
chr04	0.574536	0.719289	344953	-	ID=NC_001136.8:RAD59:unknown_transcript_1;Parent=NC_001136.8:RAD59;locus_tag=YDL059C;note=Rad59p;experiment=experimental evidence%2C no additional details recorded;product=Protein involved in the repair of double-strand breaks in DNA during vegetative gro
chr04	0.94341	0.955381	345665	+	ID=NC_001136.8:USO1:unknown_transcript_1;Parent=NC_001136.8:USO1;locus_tag=YDL058W;gene_synonym=INT1;note=Uso1p;experiment=experimental evidence%2C no additional details recorded;product=Essential protein involved in intracellular protein transport%2C coi
chr04	0.828498	0.988912	351434	+	locus_tag=YDL057W;note=Ydl057wp;inference=non-experimental evidence%2C no additional details recorded;product=Putative protein of unknown function%3B YDL057W is not an essential gene;protein_id=NP_010226.1;db_xref=SGD:S000002215;db_xref=GI:6320146;db_xref
chr04	0.786695	0.967426	352877	+	ID=NC_001136.8:MBP1:unknown_transcript_1;Parent=NC_001136.8:MBP1;locus_tag=YDL056W;note=Transcription factor involved in regulation of cell cycle progression from G1 to S phase%2C forms a complex with Swi6p that binds to MluI cell cycle box regulatory ele
chr04	0.831352	0.901119	356759	-	ID=NC_001136.8:PSA1:unknown_transcript_1;Parent=NC_001136.8:PSA1;locus_tag=YDL055C;gene_synonym=SRB1;gene_synonym=VIG9;gene_synonym=MPG1;EC_number=2.7.7.13;note=Psa1p;experiment=experimental evidence%2C no additional details recorded;product=GDP-mannose p
chr04	0.465494	0.856358	361285	-	ID=NC_001136.8:MCH1:unknown_transcript_1;Parent=NC_001136.8:MCH1;locus_tag=YDL054C;note=Protein with similarity to mammalian monocarboxylate permeases%2C which are involved in transport of monocarboxylic acids across the plasma membrane%3B mutant is not d
chr04	0.571342	0.865393	362256	-	ID=NC_001136.8:PBP4:unknown_transcript_1;Parent=NC_001136.8:PBP4;locus_tag=YDL053C;note=Pbp4p;experiment=experimental evidence%2C no additional details recorded;product=Pbp1p binding protein%2C interacts strongly with Pab1p-binding protein 1 %28Pbp1p%29 i
chr04	0.560767	0.638595	363583	-	ID=NC_001136.8:SLC1:unknown_transcript_1;Parent=NC_001136.8:SLC1;locus_tag=YDL052C;EC_number=2.3.1.51;note=Slc1p;experiment=experimental evidence%2C no additional details recorded;product=1-acyl-sn-gylcerol-3-phosphate acyltransferase%2C catalyzes the acy
chr04	0.682284	0.754747	363952	+	ID=NC_001136.8:LHP1:unknown_transcript_1;Parent=NC_001136.8:LHP1;locus_tag=YDL051W;gene_synonym=YLA1;gene_synonym=LAH1;note=RNA binding protein required for maturation of tRNA and snRNA precursors%3B acts as a molecular chaperone for RNAs transcribed by p
chr04	0.908354	0.828536	365874	-	ID=NC_001136.8:KNH1:unknown_transcript_1;Parent=NC_001136.8:KNH1;locus_tag=YDL049C;note=Protein with similarity to Kre9p%2C which is involved in cell wall beta 1%2C6-glucan synthesis%3B overproduction suppresses growth defects of a kre9 null mutant;experi
chr04	0.300516	0.930691	368211	-	ID=NC_001136.8:STP4:unknown_transcript_1;Parent=NC_001136.8:STP4;locus_tag=YDL048C;note=Stp4p;experiment=experimental evidence%2C no additional details recorded;product=Protein containing a Kruppel-type zinc-finger domain%3B has similarity to Stp1p%2C Stp
chr04	0.166535	0.850004	369769	+	ID=NC_001136.8:SIT4:unknown_transcript_1;Parent=NC_001136.8:SIT4;locus_tag=YDL047W;gene_synonym=LGN4;EC_number=3.1.3.16;note=Type 2A-related serine-threonine phosphatase that functions in the G1%2FS transition of the mitotic cycle%3B cytoplasmic and nucle
chr04	0.179835	0.559076	371237	+	ID=NC_001136.8:NPC2:unknown_transcript_1;Parent=NC_001136.8:NPC2;locus_tag=YDL046W;note=Npc2p;experiment=experimental evidence%2C no additional details recorded;product=Functional homolog of human NPC2%2FHe1%2C which is a cholesterol-binding protein whose
chr04	0.583302	0.895625	372245	+	ID=NC_001136.8:MRP10:unknown_transcript_1;Parent=NC_001136.8:MRP10;locus_tag=YDL045W-A;note=Mrp10p;experiment=experimental evidence%2C no additional details recorded;product=Mitochondrial ribosomal protein of the small subunit;protein_id=NP_010238.1;db_xr
chr04	0.256914	0.783434	373605	-	ID=NC_001136.8:FAD1:unknown_transcript_1;Parent=NC_001136.8:FAD1;locus_tag=YDL045C;EC_number=2.7.7.2;note=Flavin adenine dinucleotide %28FAD%29 synthetase%2C performs the second step in synthesis of FAD from riboflavin;experiment=experimental evidence%2C
chr04	0.767888	0.971209	375286	-	ID=NC_001136.8:MTF2:unknown_transcript_1;Parent=NC_001136.8:MTF2;locus_tag=YDL044C;gene_synonym=NAM1;note=Mtf2p;experiment=experimental evidence%2C no additional details recorded;product=Mitochondrial matrix protein that interacts with an N-terminal regio
chr04	0.68507	0.856706	376477	-	ID=NC_001136.8:PRP11:unknown_transcript_1;Parent=NC_001136.8:PRP11;locus_tag=YDL043C;gene_synonym=RNA11;note=Subunit of the SF3a splicing factor complex%2C required for spliceosome assembly;experiment=experimental evidence%2C no additional details recorde
chr04	0.949045	0.950433	378442	-	ID=NC_001136.8:SIR2:unknown_transcript_1;Parent=NC_001136.8:SIR2;locus_tag=YDL042C;gene_synonym=MAR1;note=Sir2p;experiment=experimental evidence%2C no additional details recorded;product=Conserved NAD%2B dependent histone deacetylase of the Sirtuin family
chr04	0.764975	0.868362	381435	-	ID=NC_001136.8:NAT1:unknown_transcript_1;Parent=NC_001136.8:NAT1;locus_tag=YDL040C;gene_synonym=AAA1;EC_number=2.3.1.88;note=Subunit of the N-terminal acetyltransferase NatA %28Nat1p%2C Ard1p%2C Nat5p%29%3B N-terminally acetylates many proteins%2C which i
chr04	0.680923	0.825294	382330	-	ID=NC_001136.8:PRM7:unknown_transcript_1;Parent=NC_001136.8:PRM7;locus_tag=YDL039C;note=Prm7p;experiment=experimental evidence%2C no additional details recorded;product=Pheromone-regulated protein%2C predicted to have one transmembrane segment%3B promoter
chr04	0.801138	0.951533	384078	-	locus_tag=YDL038C;note=Ydl038cp;inference=non-experimental evidence%2C no additional details recorded;product=Putative protein of unknown function%3B deletion confers sensitivity to 4-%28N-%28S-glutathionylacetyl%29amino%29 phenylarsenoxide %28GSAO%29;pro
chr04	0.818843	0.774937	385584	-	ID=NC_001136.8:BSC1:unknown_transcript_1;Parent=NC_001136.8:BSC1;locus_tag=YDL037C;note=Protein of unconfirmed function%2C similar to cell surface flocculin Muc1p%3B ORF exhibits genomic organization compatible with a translational readthrough-dependent m
chr04	0.93154	0.927571	388898	-	ID=NC_001136.8:PUS9:unknown_transcript_1;Parent=NC_001136.8:PUS9;locus_tag=YDL036C;note=Pus9p;experiment=experimental evidence%2C no additional details recorded;product=Mitochondrial tRNA pseudouridine synthase involved in pseudouridylation of mitochondri
chr04	0.975573	0.977145	392054	-	ID=NC_001136.8:GPR1:unknown_transcript_1;Parent=NC_001136.8:GPR1;locus_tag=YDL035C;note=Plasma membrane G protein coupled receptor %28GPCR%29 that interacts with the heterotrimeric G protein alpha subunit%2C Gpa2p%2C and with Plc1p%3B sensor that integrat
chr04	0.78796	0.829865	393909	-	ID=NC_001136.8:SLM3:unknown_transcript_1;Parent=NC_001136.8:SLM3;locus_tag=YDL033C;gene_synonym=MTU1;gene_synonym=MTO2;EC_number=2.1.1.61;note=tRNA-specific 2-thiouridylase%2C responsible for 2-thiolation of the wobble base of mitochondrial tRNAs%3B human
chr04	0.829002	0.939411	394214	+	ID=NC_001136.8:DBP10:unknown_transcript_1;Parent=NC_001136.8:DBP10;locus_tag=YDL031W;note=Putative ATP-dependent RNA helicase of the DEAD-box protein family%2C constituent of 66S pre-ribosomal particles%3B essential protein involved in ribosome biogenesis
chr04	0.898314	0.934883	397534	+	ID=NC_001136.8:PRP9:unknown_transcript_1;Parent=NC_001136.8:PRP9;locus_tag=YDL030W;note=Subunit of the SF3a splicing factor complex%2C required for spliceosome assembly%3B acts after the formation of the U1 snRNP-pre-mRNA complex;experiment=experimental e
chr04	0.913794	0.956431	399337	+	ID=NC_001136.8:ARP2:unknown_transcript_1;Parent=NC_001136.8:ARP2;locus_tag=YDL029W;gene_synonym=ACT2;note=Essential component of the Arp2%2F3 complex%2C which is a highly conserved actin nucleation center required for the motility and integrity of actin p
chr04	0.527918	0.713947	403288	-	ID=NC_001136.8:MPS1:unknown_transcript_1;Parent=NC_001136.8:MPS1;locus_tag=YDL028C;gene_synonym=RPK1;EC_number=2.7.1.-;note=Mps1p;experiment=experimental evidence%2C no additional details recorded;product=Dual-specificity kinase required for spindle pole
chr04	0.928615	0.737598	404954	-	locus_tag=YDL027C;note=Ydl027cp;inference=non-experimental evidence%2C no additional details recorded;product=Putative protein of unknown function%3B the authentic%2C non-tagged protein is detected in highly purified mitochondria in high-throughput studie
chr04	0.961347	0.972527	407203	-	locus_tag=YDL025C;note=Ydl025cp;inference=non-experimental evidence%2C no additional details recorded;product=Putative protein kinase%2C potentially phosphorylated by Cdc28p%3B YDL025C is not an essential gene;protein_id=NP_010259.1;db_xref=SGD:S000002183
chr04	0.613216	0.932805	409854	-	ID=NC_001136.8:DIA3:unknown_transcript_1;Parent=NC_001136.8:DIA3;locus_tag=YDL024C;EC_number=3.1.3.2;note=Protein of unknown function%2C involved in invasive and pseudohyphal growth;experiment=experimental evidence%2C no additional details recorded;produc
chr04	0.573467	0.687792	411822	+	ID=NC_001136.8:GPD1:unknown_transcript_1;Parent=NC_001136.8:GPD1;locus_tag=YDL022W;gene_synonym=OSR5;gene_synonym=OSG1;gene_synonym=HOR1;gene_synonym=DAR1;EC_number=1.1.1.8;note=NAD-dependent glycerol-3-phosphate dehydrogenase%2C key enzyme of glycerol sy
chr04	0.859107	0.884354	413950	+	ID=NC_001136.8:GPM2:unknown_transcript_1;Parent=NC_001136.8:GPM2;locus_tag=YDL021W;note=Homolog of Gpm1p phosphoglycerate mutase which converts 3-phosphoglycerate to 2-phosphoglycerate in glycolysis%3B may be non-functional derivative of a gene duplicatio
chr04	0.749656	0.780659	416705	-	ID=NC_001136.8:RPN4:unknown_transcript_1;Parent=NC_001136.8:RPN4;locus_tag=YDL020C;gene_synonym=UFD5;gene_synonym=SON1;note=Transcription factor that stimulates expression of proteasome genes%3B Rpn4p levels are in turn regulated by the 26S proteasome in
chr04	0.59799	0.479557	421511	-	ID=NC_001136.8:OSH2:unknown_transcript_1;Parent=NC_001136.8:OSH2;locus_tag=YDL019C;note=Osh2p;experiment=experimental evidence%2C no additional details recorded;product=Member of an oxysterol-binding protein family with seven members in S. cerevisiae%3B f
chr04	0.688966	0.721143	423507	-	ID=NC_001136.8:ERP3:unknown_transcript_1;Parent=NC_001136.8:ERP3;locus_tag=YDL018C;note=Protein with similarity to Emp24p and Erv25p%2C member of the p24 family involved in ER to Golgi transport;experiment=experimental evidence%2C no additional details re
chr04	0.752147	0.877461	424206	+	ID=NC_001136.8:CDC7:unknown_transcript_1;Parent=NC_001136.8:CDC7;locus_tag=YDL017W;gene_synonym=SAS1;gene_synonym=LSD6;EC_number=2.7.1.-;note=DDK %28Dbf4-dependent kinase%29 catalytic subunit required for firing origins and replication fork progression in
chr04	0.879205	0.892113	426931	-	ID=NC_001136.8:TSC13:unknown_transcript_1;Parent=NC_001136.8:TSC13;locus_tag=YDL015C;note=Tsc13p;experiment=experimental evidence%2C no additional details recorded;product=Enoyl reductase that catalyzes the last step in each cycle of very long chain fatty
chr04	0.264118	0.789501	427361	+	ID=NC_001136.8:NOP1:unknown_transcript_1;Parent=NC_001136.8:NOP1;locus_tag=YDL014W;gene_synonym=LOT3;note=Nucleolar protein%2C component of the small subunit processome complex%2C which is required for processing of pre-18S rRNA%3B has similarity to mamma
chr04	0.95721	0.945739	429064	+	ID=NC_001136.8:SLX5:unknown_transcript_1;Parent=NC_001136.8:SLX5;locus_tag=YDL013W;gene_synonym=HEX3;note=Subunit of the Slx5-Slx8 substrate-specific ubiquitin ligase complex%3B stimulated by prior attachment of SUMO to the substrate;experiment=experiment
chr04	0.700472	0.857765	431514	-	locus_tag=YDL012C;note=Ydl012cp;inference=non-experimental evidence%2C no additional details recorded;product=Plasma membrane protein of unknown function%3B YDL012C is not an essential gene;protein_id=NP_010272.1;db_xref=SGD:S000002170;db_xref=GI:6320192;
chr04	0.628454	0.972015	432327	+	ID=NC_001136.8:GRX6:unknown_transcript_1;Parent=NC_001136.8:GRX6;locus_tag=YDL010W;note=Monothiol glutaredoxin that binds an iron-sulfur cluster%3B more similar in activity to dithiol than other monothiol glutaredoxins%3B forms homodimers%3B green fluores
chr04	0.787992	0.866726	433494	+	ID=NC_001136.8:APC11:unknown_transcript_1;Parent=NC_001136.8:APC11;locus_tag=YDL008W;note=Catalytic core subunit of the Anaphase-Promoting Complex%2FCyclosome %28APC%2FC%29%2C which is a ubiquitin-protein ligase required for degradation of anaphase inhibi
chr04	0.930037	0.990969	436821	-	locus_tag=YDL007C-A;note=Ydl007c-ap;inference=non-experimental evidence%2C no additional details recorded;product=Putative protein of unknown function;protein_id=NP_001032574.1;db_xref=SGD:S000113557;db_xref=GI:82795244;db_xref=GeneID:3799969;exon_number=
chr04	0.89631	0.944049	438044	+	ID=NC_001136.8:RPT2:unknown_transcript_1;Parent=NC_001136.8:RPT2;locus_tag=YDL007W;gene_synonym=YTA5;gene_synonym=YHS4;note=Rpt2p;experiment=experimental evidence%2C no additional details recorded;product=One of six ATPases of the 19S regulatory particle
chr04	0.718072	0.684729	439906	+	ID=NC_001136.8:PTC1:unknown_transcript_1;Parent=NC_001136.8:PTC1;locus_tag=YDL006W;gene_synonym=TPD1;gene_synonym=KCS2;gene_synonym=CWH47;EC_number=3.1.3.16;note=Type 2C protein phosphatase %28PP2C%29%3B inactivates the osmosensing MAPK cascade by dephosp
chr04	0.932084	0.98103	442306	-	ID=NC_001136.8:MED2:unknown_transcript_1;Parent=NC_001136.8:MED2;locus_tag=YDL005C;note=Subunit of the RNA polymerase II mediator complex%3B associates with core polymerase subunits to form the RNA polymerase II holoenzyme%3B essential for transcriptional
chr04	0.706257	0.893401	443026	+	ID=NC_001136.8:ATP16:unknown_transcript_1;Parent=NC_001136.8:ATP16;locus_tag=YDL004W;EC_number=3.6.3.14;note=Delta subunit of the central stalk of mitochondrial F1F0 ATP synthase%2C which is a large%2C evolutionarily conserved enzyme complex required for
chr04	0.849867	0.94362	444680	+	ID=NC_001136.8:MCD1:unknown_transcript_1;Parent=NC_001136.8:MCD1;locus_tag=YDL003W;gene_synonym=SCC1;gene_synonym=RHC21;gene_synonym=PDS3;note=Mcd1p;experiment=experimental evidence%2C no additional details recorded;product=Essential protein required for
chr04	0.802779	0.949909	447575	-	ID=NC_001136.8:NHP10:unknown_transcript_1;Parent=NC_001136.8:NHP10;locus_tag=YDL002C;gene_synonym=HMO2;note=Protein related to mammalian high mobility group proteins%3B likely component of the INO80 complex%2C which is an ATP-dependent chromatin-remodelin
chr04	0.805212	0.773579	447981	+	ID=NC_001136.8:RMD1:unknown_transcript_1;Parent=NC_001136.8:RMD1;locus_tag=YDL001W;note=Rmd1p;experiment=experimental evidence%2C no additional details recorded;product=Cytoplasmic protein required for sporulation;protein_id=NP_010283.1;db_xref=SGD:S00000
chr04	0.650409	0.846361	452472	-	ID=NC_001136.8:NTH1:unknown_transcript_1;Parent=NC_001136.8:NTH1;locus_tag=YDR001C;EC_number=3.2.1.28;note=Nth1p;experiment=experimental evidence%2C no additional details recorded;product=Neutral trehalase%2C degrades trehalose%3B required for thermotoler
chr04	0.744997	0.899015	453042	+	ID=NC_001136.8:YRB1:unknown_transcript_1;Parent=NC_001136.8:YRB1;locus_tag=YDR002W;gene_synonym=SFO1;gene_synonym=HTN1;gene_synonym=CST20;note=Yrb1p;experiment=experimental evidence%2C no additional details recorded;product=Ran GTPase binding protein%3B i
chr04	0.965861	0.904654	454119	+	ID=NC_001136.8:RCR2:unknown_transcript_1;Parent=NC_001136.8:RCR2;locus_tag=YDR003W;note=Vacuolar protein that presumably functions within the endosomal-vacuolar trafficking pathway%2C affecting events that determine whether plasma membrane proteins are de
chr04	0.753421	0.878339	454779	+	locus_tag=YDR003W-A;note=Ydr003w-ap;inference=non-experimental evidence%2C no additional details recorded;product=Putative protein of unknown function%3B identified by expression profiling and mass spectrometry;protein_id=NP_878061.1;db_xref=SGD:S00002881
chr04	0.933053	0.951368	455198	+	ID=NC_001136.8:RAD57:unknown_transcript_1;Parent=NC_001136.8:RAD57;locus_tag=YDR004W;note=Rad57p;experiment=experimental evidence%2C no additional details recorded;product=Protein that stimulates strand exchange by stabilizing the binding of Rad51p to sin
chr04	0.948637	0.925233	458100	-	ID=NC_001136.8:MAF1:unknown_transcript_1;Parent=NC_001136.8:MAF1;locus_tag=YDR005C;note=Negative regulator of RNA polymerase III%3B component of several signaling pathways that repress polymerase III transcription in response to changes in cellular enviro
chr04	0.914283	0.980289	461244	-	ID=NC_001136.8:SOK1:unknown_transcript_1;Parent=NC_001136.8:SOK1;locus_tag=YDR006C;note=Sok1p;experiment=experimental evidence%2C no additional details recorded;product=Protein whose overexpression suppresses the growth defect of mutants lacking protein k
chr04	0.853359	0.849478	461839	+	ID=NC_001136.8:TRP1:unknown_transcript_1;Parent=NC_001136.8:TRP1;locus_tag=YDR007W;EC_number=5.3.1.24;note=Trp1p;experiment=experimental evidence%2C no additional details recorded;product=Phosphoribosylanthranilate isomerase that catalyzes the third step
chr04	0.790168	0.849505	463431	+	ID=NC_001136.8:GAL3:unknown_transcript_1;Parent=NC_001136.8:GAL3;locus_tag=YDR009W;note=Transcriptional regulator involved in activation of the GAL genes in response to galactose%3B forms a complex with Gal80p to relieve Gal80p inhibition of Gal4p%3B bind
chr04	0.775924	0.704219	465916	+	ID=NC_001136.8:SNQ2:unknown_transcript_1;Parent=NC_001136.8:SNQ2;locus_tag=YDR011W;note=Snq2p;experiment=experimental evidence%2C no additional details recorded;product=Plasma membrane ATP-binding cassette %28ABC%29 transporter%2C multidrug transporter in
chr04	0.908069	0.956535	471850	+	ID=NC_001136.8:RPL4B:unknown_transcript_1;Parent=NC_001136.8:RPL4B;locus_tag=YDR012W;note=Rpl4bp;experiment=experimental evidence%2C no additional details recorded;product=Protein component of the large %2860S%29 ribosomal subunit%2C nearly identical to R
chr04	0.5625	0.849212	473154	+	ID=NC_001136.8:PSF1:unknown_transcript_1;Parent=NC_001136.8:PSF1;locus_tag=YDR013W;gene_synonym=CDC101;note=Subunit of the GINS complex %28Sld5p%2C Psf1p%2C Psf2p%2C Psf3p%29%2C which is localized to DNA replication origins and implicated in assembly of t
chr04	0.476487	0.912473	474043	+	ID=NC_001136.8:RAD61:unknown_transcript_1;Parent=NC_001136.8:RAD61;locus_tag=YDR014W;note=Rad61p;experiment=experimental evidence%2C no additional details recorded;product=Protein of unknown function%3B mutation confers radiation sensitivity;protein_id=NP
chr04	0.896776	0.909717	477794	+	ID=NC_001136.8:HED1:unknown_transcript_1;Parent=NC_001136.8:HED1;locus_tag=YDR014W-A;note=Meiosis-specific protein that down-regulates Rad51p-mediated mitotic recombination when the meiotic recombination machinery is impaired%3B early meiotic gene%2C tran
chr04	0.873566	0.869993	478755	-	ID=NC_001136.8:DAD1:unknown_transcript_1;Parent=NC_001136.8:DAD1;locus_tag=YDR016C;note=Essential subunit of the Dam1 complex %28aka DASH complex%29%2C couples kinetochores to the force produced by MT depolymerization thereby aiding in chromosome segregat
chr04	0.943354	0.895573	482264	-	ID=NC_001136.8:KCS1:unknown_transcript_1;Parent=NC_001136.8:KCS1;locus_tag=YDR017C;note=Kcs1p;experiment=experimental evidence%2C no additional details recorded;product=Inositol hexakisphosphate %28IP6%29 and inositol heptakisphosphate %28IP7%29 kinase%3B
chr04	0.520789	0.936167	483857	-	locus_tag=YDR018C;note=Ydr018cp;inference=non-experimental evidence%2C no additional details recorded;product=Probable membrane protein with three predicted transmembrane domains%3B homologous to Ybr042cp%2C similar to C. elegans F55A11.5 and maize 1-acyl
chr04	0.952698	0.953636	485362	-	ID=NC_001136.8:GCV1:unknown_transcript_1;Parent=NC_001136.8:GCV1;locus_tag=YDR019C;gene_synonym=GSD1;EC_number=2.1.2.10;note=T subunit of the mitochondrial glycine decarboxylase complex%2C required for the catabolism of glycine to 5%2C10-methylene-THF%3B
chr04	0.7837	0.759261	486441	-	ID=NC_001136.8:DAS2:unknown_transcript_1;Parent=NC_001136.8:DAS2;locus_tag=YDR020C;note=Predicted protein shares weak similarity with uridine kinases and with phosphoribokinases%3B null mutant suppresses dst1delta sensitivity for 6-azauracil;experiment=ex
chr04	0.938986	0.904411	486801	+	ID=NC_001136.8:FAL1:unknown_transcript_1;Parent=NC_001136.8:FAL1;locus_tag=YDR021W;note=Nucleolar protein required for maturation of 18S rRNA%2C member of the eIF4A subfamily of DEAD-box ATP-dependent RNA helicases;experiment=experimental evidence%2C no a
chr04	0.456455	0.892313	488659	-	ID=NC_001136.8:CIS1:unknown_transcript_1;Parent=NC_001136.8:CIS1;locus_tag=YDR022C;gene_synonym=ATG31;note=Protein required for autophagosome formation in concert with Atg17p%3B may be involved in microtubule organization%3B high-copy suppressor of CIK1 d
chr04	0.62496	0.91678	489505	+	ID=NC_001136.8:SES1:unknown_transcript_1;Parent=NC_001136.8:SES1;locus_tag=YDR023W;EC_number=6.1.1.11;note=Ses1p;experiment=experimental evidence%2C no additional details recorded;product=Cytosolic seryl-tRNA synthetase%2C class II aminoacyl-tRNA syntheta
chr04	0.896189	0.974343	491512	+	ID=NC_001136.8:RPS11A:unknown_transcript_1;Parent=NC_001136.8:RPS11A;locus_tag=YDR025W;note=Rps11ap;experiment=experimental evidence%2C no additional details recorded;product=Protein component of the small %2840S%29 ribosomal subunit%3B identical to Rps11
chr04	0.516781	0.917419	494265	-	locus_tag=YDR026C;note=Ydr026cp;inference=non-experimental evidence%2C no additional details recorded;product=Protein of unknown function that may interact with ribosomes%2C based on co-purification experiments%3B Myb-like DNA-binding protein that may bin
chr04	0.836855	0.933026	497315	-	ID=NC_001136.8:VPS54:unknown_transcript_1;Parent=NC_001136.8:VPS54;locus_tag=YDR027C;gene_synonym=TCS3;gene_synonym=CGP1;gene_synonym=LUV1;note=Vps54p;experiment=experimental evidence%2C no additional details recorded;product=Component of the GARP %28Golg
chr04	0.960937	0.959981	500876	-	ID=NC_001136.8:REG1:unknown_transcript_1;Parent=NC_001136.8:REG1;locus_tag=YDR028C;gene_synonym=SRN1;gene_synonym=SPP43;gene_synonym=PZF240;gene_synonym=HEX2;note=Regulatory subunit of type 1 protein phosphatase Glc7p%2C involved in negative regulation of
chr04	0.960805	0.944177	503270	-	ID=NC_001136.8:RAD28:unknown_transcript_1;Parent=NC_001136.8:RAD28;locus_tag=YDR030C;note=Rad28p;experiment=experimental evidence%2C no additional details recorded;product=Protein involved in transcription-coupled repair nucleotide excision repair of UV-i
chr04	0.891813	0.889616	503495	+	ID=NC_001136.8:MIC14:unknown_transcript_1;Parent=NC_001136.8:MIC14;locus_tag=YDR031W;note=Mitochondrial intermembrane space cysteine motif protein of 14 kDa;experiment=experimental evidence%2C no additional details recorded;product=Mic14p;protein_id=NP_01
chr04	0.906121	0.962782	504692	-	ID=NC_001136.8:PST2:unknown_transcript_1;Parent=NC_001136.8:PST2;locus_tag=YDR032C;note=Pst2p;experiment=experimental evidence%2C no additional details recorded;product=Protein with similarity to members of a family of flavodoxin-like proteins%3B induced
chr04	0.733691	0.804815	508144	+	ID=NC_001136.8:MRH1:unknown_transcript_1;Parent=NC_001136.8:MRH1;locus_tag=YDR033W;note=Protein that localizes primarily to the plasma membrane%2C also found at the nuclear envelope%3B the authentic%2C non-tagged protein is detected in mitochondria in a p
chr04	0.876212	0.873431	512106	-	ID=NC_001136.8:LYS14:unknown_transcript_1;Parent=NC_001136.8:LYS14;locus_tag=YDR034C;note=Transcriptional activator involved in regulation of genes of the lysine biosynthesis pathway%3B requires 2-aminoadipate semialdehyde as co-inducer;experiment=experim
chr04	0.967223	0.981437	519353	-	locus_tag=YDR034C-C;note=Ydr034c-cp;inference=non-experimental evidence%2C no additional details recorded;product=Retrotransposon TYA Gag gene co-transcribed with TYB Pol%3B translated as TYA or TYA-TYB polyprotein%3B Gag is a nucleocapsid protein that is
chr04	0.967223	0.981437	519353	-	locus_tag=YDR034C-D;note=Ydr034c-dp;inference=non-experimental evidence%2C no additional details recorded;product=Retrotransposon TYA Gag and TYB Pol genes%3B transcribed%2Ftranslated as one unit%3B polyprotein is processed to make a nucleocapsid-like pro
chr04	0.82586	0.927634	520689	-	locus_tag=YDR034C-A;note=Ydr034c-ap;inference=non-experimental evidence%2C no additional details recorded;product=Putative protein of unknown function%3B contained within the solo Ty1 LTR element YDRWdelta7;protein_id=NP_010318.1;db_xref=SGD:S000007233;db
chr04	0.800941	0.953236	521311	+	locus_tag=YDR034W-B;note=Ydr034w-bp;inference=non-experimental evidence%2C no additional details recorded;product=Protein of unknown function%3B green fluorescent protein %28GFP%29-fusion protein localizes to the cell periphery;protein_id=NP_010319.1;db_x
chr04	0.83081	0.88081	521813	+	ID=NC_001136.8:ARO3:unknown_transcript_1;Parent=NC_001136.8:ARO3;locus_tag=YDR035W;EC_number=2.5.1.54;note=Aro3p;experiment=experimental evidence%2C no additional details recorded;product=3-deoxy-D-arabino-heptulosonate-7-phosphate %28DAHP%29 synthase%2C
chr04	0.963745	0.928994	524710	-	ID=NC_001136.8:EHD3:unknown_transcript_1;Parent=NC_001136.8:EHD3;locus_tag=YDR036C;gene_synonym=MRP5;note=Ehd3p;experiment=experimental evidence%2C no additional details recorded;product=3-hydroxyisobutyryl-CoA hydrolase%2C member of a family of enoyl-CoA
chr04	0.951365	0.956861	525437	+	ID=NC_001136.8:KRS1:unknown_transcript_1;Parent=NC_001136.8:KRS1;locus_tag=YDR037W;gene_synonym=GCD5;EC_number=6.1.1.6;note=Lysyl-tRNA synthetase%3B also identified as a negative regulator of general control of amino acid biosynthesis;experiment=experimen
chr04	NA	NA	530694	-	ID=NC_001136.8:ENA5:unknown_transcript_1;Parent=NC_001136.8:ENA5;locus_tag=YDR038C;EC_number=3.6.1.-;note=Protein with similarity to P-type ATPase sodium pumps%2C member of the Na%2B efflux ATPase family;experiment=experimental evidence%2C no additional d
chr04	0.968136	0.938268	534579	-	ID=NC_001136.8:ENA2:unknown_transcript_1;Parent=NC_001136.8:ENA2;locus_tag=YDR039C;EC_number=3.6.1.-;note=P-type ATPase sodium pump%2C involved in Na%2B efflux to allow salt tolerance%3B likely not involved in Li%2B efflux;experiment=experimental evidence
chr04	0.799252	0.889929	538464	-	ID=NC_001136.8:ENA1:unknown_transcript_1;Parent=NC_001136.8:ENA1;locus_tag=YDR040C;gene_synonym=PMR2;gene_synonym=HOR6;EC_number=3.6.1.-;note=P-type ATPase sodium pump%2C involved in Na%2B and Li%2B efflux to allow salt tolerance;experiment=experimental e
chr04	0.81528	0.699344	539800	+	ID=NC_001136.8:RSM10:unknown_transcript_1;Parent=NC_001136.8:RSM10;locus_tag=YDR041W;note=Rsm10p;experiment=experimental evidence%2C no additional details recorded;product=Mitochondrial ribosomal protein of the small subunit%2C has similarity to E. coli S
chr04	0.850075	0.827023	541200	-	locus_tag=YDR042C;note=Ydr042cp;inference=non-experimental evidence%2C no additional details recorded;product=Putative protein of unknown function%3B expression is increased in ssu72-ts69 mutant;protein_id=NP_010327.1;db_xref=SGD:S000002449;db_xref=GI:632
chr04	0.622565	0.935475	543367	-	ID=NC_001136.8:NRG1:unknown_transcript_1;Parent=NC_001136.8:NRG1;locus_tag=YDR043C;note=Transcriptional repressor that recruits the Cyc8p-Tup1p complex to promoters%3B mediates glucose repression and negatively regulates a variety of processes including f
chr04	0.746833	0.843577	546640	+	ID=NC_001136.8:HEM13:unknown_transcript_1;Parent=NC_001136.8:HEM13;locus_tag=YDR044W;EC_number=1.3.3.3;note=Hem13p;experiment=experimental evidence%2C no additional details recorded;product=Coproporphyrinogen III oxidase%2C an oxygen requiring enzyme that
chr04	0.925204	0.905063	548308	-	ID=NC_001136.8:RPC11:unknown_transcript_1;Parent=NC_001136.8:RPC11;locus_tag=YDR045C;EC_number=2.7.7.6;note=Rpc11p;experiment=experimental evidence%2C no additional details recorded;product=RNA polymerase III subunit C11%3B mediates pol III RNA cleavage a
chr04	0.511017	0.492315	550574	-	ID=NC_001136.8:BAP3:unknown_transcript_1;Parent=NC_001136.8:BAP3;locus_tag=YDR046C;gene_synonym=PAP1;note=Bap3p;experiment=experimental evidence%2C no additional details recorded;product=Amino acid permease involved in the uptake of cysteine%2C leucine%2C
chr04	0.947976	0.943525	551858	+	ID=NC_001136.8:HEM12:unknown_transcript_1;Parent=NC_001136.8:HEM12;locus_tag=YDR047W;gene_synonym=HEM6;EC_number=4.1.1.37;note=Uroporphyrinogen decarboxylase%2C catalyzes the fifth step in the heme biosynthetic pathway%3B localizes to both the cytoplasm a
chr04	0.81106	0.820052	553252	+	locus_tag=YDR049W;note=Zinc finger protein%3B putative transcription factor that may interact with proteins involved in histone acetylation or deacetylation%3B may be involved in altering acetylation on histone lysines;inference=non-experimental evidence%
chr04	0.661729	0.801472	556470	-	ID=NC_001136.8:TPI1:unknown_transcript_1;Parent=NC_001136.8:TPI1;locus_tag=YDR050C;EC_number=5.3.1.1;note=Triose phosphate isomerase%2C abundant glycolytic enzyme%3B mRNA half-life is regulated by iron availability%3B transcription is controlled by activa
chr04	0.927223	0.967351	558058	-	locus_tag=YDR051C;note=Ydr051cp;inference=non-experimental evidence%2C no additional details recorded;product=Protein of unknown function%3B interacts with Hsp82p in two-hybrid assay%3B deletion confers sensitivity to Nickel;protein_id=NP_010336.1;db_xref
chr04	0.662461	0.95079	560623	-	ID=NC_001136.8:DBF4:unknown_transcript_1;Parent=NC_001136.8:DBF4;locus_tag=YDR052C;gene_synonym=DNA52;gene_synonym=LSD7;note=Regulatory subunit of Cdc7p-Dbf4p kinase complex%2C required for Cdc7p kinase activity and initiation of DNA replication%3B phosph
chr04	0.955929	0.982048	562325	-	ID=NC_001136.8:CDC34:unknown_transcript_1;Parent=NC_001136.8:CDC34;locus_tag=YDR054C;gene_synonym=UBC3;gene_synonym=DNA6;EC_number=6.3.2.19;note=Ubiquitin-conjugating enzyme %28E2%29 and catalytic subunit of SCF ubiquitin-protein ligase complex %28togethe
chr04	0.950321	0.95254	563525	+	ID=NC_001136.8:PST1:unknown_transcript_1;Parent=NC_001136.8:PST1;locus_tag=YDR055W;gene_synonym=HPF2;note=Pst1p;experiment=experimental evidence%2C no additional details recorded;product=Cell wall protein that contains a putative GPI-attachment site%3B se
chr04	0.866877	0.944299	565638	-	locus_tag=YDR056C;note=Ydr056cp;inference=non-experimental evidence%2C no additional details recorded;product=Putative protein of unknown function%3B green fluorescent protein %28GFP%29-fusion protein localizes to the endoplasmic retiuculum%3B YDR056C is
chr04	0.842844	0.97138	565925	+	ID=NC_001136.8:YOS9:unknown_transcript_1;Parent=NC_001136.8:YOS9;locus_tag=YDR057W;note=Yos9p;experiment=experimental evidence%2C no additional details recorded;product=ER quality-control lectin%3B integral subunit of the HRD ligase%3B serves as a recepto
chr04	0.693744	0.923858	568701	-	ID=NC_001136.8:TGL2:unknown_transcript_1;Parent=NC_001136.8:TGL2;locus_tag=YDR058C;EC_number=3.1.1.3;note=Tgl2p;experiment=experimental evidence%2C no additional details recorded;product=Protein with lipolytic activity towards triacylglycerols and diacylg
chr04	0.791084	0.833871	569768	-	ID=NC_001136.8:UBC5:unknown_transcript_1;Parent=NC_001136.8:UBC5;locus_tag=YDR059C;EC_number=6.3.2.19;note=Ubiquitin-conjugating enzyme that mediates selective degradation of short-lived and abnormal proteins%2C central component of the cellular stress re
chr04	0.776099	0.856229	570646	+	ID=NC_001136.8:MAK21:unknown_transcript_1;Parent=NC_001136.8:MAK21;locus_tag=YDR060W;gene_synonym=NOC1;note=Mak21p;experiment=experimental evidence%2C no additional details recorded;product=Constituent of 66S pre-ribosomal particles%2C required for large
chr04	0.293001	0.951699	574161	+	locus_tag=YDR061W;note=Ydr061wp;inference=non-experimental evidence%2C no additional details recorded;product=Protein with similarity to ATP-binding cassette %28ABC%29 transporter family members%3B lacks predicted membrane-spanning regions%3B transcriptio
chr04	0.974022	0.967688	576471	+	ID=NC_001136.8:LCB2:unknown_transcript_1;Parent=NC_001136.8:LCB2;locus_tag=YDR062W;gene_synonym=TSC1;gene_synonym=SCS1;EC_number=2.3.1.50;note=Lcb2p;experiment=experimental evidence%2C no additional details recorded;product=Component of serine palmitoyltr
chr04	0.798642	0.67467	578661	+	ID=NC_001136.8:AIM7:unknown_transcript_1;Parent=NC_001136.8:AIM7;locus_tag=YDR063W;note=Putative protein of unknown function%3B green fluorescent protein %28GFP%29-fusion protein localizes to the cytoplasm and nucleus%3B null mutant is viable and displays
chr04	0.731086	0.897272	579456	+	ID=NC_001136.8:RPS13:unknown_transcript_1;Parent=NC_001136.8:RPS13;locus_tag=YDR064W;gene_synonym=RPS13C;gene_synonym=RPS13B;note=Rps13p;experiment=experimental evidence%2C no additional details recorded;product=Protein component of the small %2840S%29 ri
chr04	0.663051	0.912533	580685	+	locus_tag=YDR065W;note=Ydr065wp;inference=non-experimental evidence%2C no additional details recorded;product=Protein of unknown function%2C required for vacuolar acidification%3B the authentic%2C non-tagged protein is detected in highly purified mitochon
chr04	0.756568	0.859894	582496	-	ID=NC_001136.8:RTR2:unknown_transcript_1;Parent=NC_001136.8:RTR2;locus_tag=YDR066C;note=Rtr2p;experiment=experimental evidence%2C no additional details recorded;product=Putative protein of unknown function%3B green fluorescent protein %28GFP%29-fusion pro
chr04	0.623843	0.854826	583463	-	ID=NC_001136.8:OCA6:unknown_transcript_1;Parent=NC_001136.8:OCA6;locus_tag=YDR067C;note=Oca6p;experiment=experimental evidence%2C no additional details recorded;product=Cytoplasmic protein required for replication of Brome mosaic virus in S. cerevisiae%2C
chr04	0.8476	0.887053	583711	+	ID=NC_001136.8:DOS2:unknown_transcript_1;Parent=NC_001136.8:DOS2;locus_tag=YDR068W;note=Protein of unknown function%2C green fluorescent protein %28GFP%29-fusion protein localizes to the cytoplasm;experiment=experimental evidence%2C no additional details
chr04	0.925708	0.963997	587717	-	ID=NC_001136.8:DOA4:unknown_transcript_1;Parent=NC_001136.8:DOA4;locus_tag=YDR069C;gene_synonym=UBP4;gene_synonym=SSV7;gene_synonym=NPI2;gene_synonym=MUT4;gene_synonym=DOS1;EC_number=3.1.2.15;note=Ubiquitin isopeptidase%2C required for recycling ubiquitin
chr04	0.492054	0.694881	588377	-	ID=NC_001136.8:FMP16:unknown_transcript_1;Parent=NC_001136.8:FMP16;locus_tag=YDR070C;note=Putative protein of unknown function%3B the authentic%2C non-tagged protein is detected in highly purified mitochondria in high-throughput studies;experiment=experim
chr04	0.755988	0.841012	589400	-	ID=NC_001136.8:PAA1:unknown_transcript_1;Parent=NC_001136.8:PAA1;locus_tag=YDR071C;note=Polyamine acetyltransferase%3B acetylates polyamines %28e.g. putrescine%2C spermidine%2C spermine%29 and also aralkylamines %28e.g. tryptamine%2C phenylethylamine%29%3
chr04	0.597339	0.878368	591342	-	ID=NC_001136.8:IPT1:unknown_transcript_1;Parent=NC_001136.8:IPT1;locus_tag=YDR072C;gene_synonym=KTI6;gene_synonym=SYR4;EC_number=2.-.-.-;note=Ipt1p;experiment=experimental evidence%2C no additional details recorded;product=Inositolphosphotransferase 1%2C
chr04	0.698892	0.887437	592436	+	ID=NC_001136.8:SNF11:unknown_transcript_1;Parent=NC_001136.8:SNF11;locus_tag=YDR073W;note=Subunit of the SWI%2FSNF chromatin remodeling complex involved in transcriptional regulation%3B interacts with a highly conserved 40-residue sequence of Snf2p;experi
chr04	0.881142	0.944407	593890	+	ID=NC_001136.8:TPS2:unknown_transcript_1;Parent=NC_001136.8:TPS2;locus_tag=YDR074W;gene_synonym=PFK3;gene_synonym=HOG2;EC_number=3.1.3.12;note=Tps2p;experiment=experimental evidence%2C no additional details recorded;product=Phosphatase subunit of the treh
chr04	0.894073	0.921433	597153	+	ID=NC_001136.8:PPH3:unknown_transcript_1;Parent=NC_001136.8:PPH3;locus_tag=YDR075W;EC_number=3.1.3.16;note=Pph3p;experiment=experimental evidence%2C no additional details recorded;product=Catalytic subunit of an evolutionarily conserved protein phosphatas
chr04	0.761751	0.887532	598465	+	ID=NC_001136.8:RAD55:unknown_transcript_1;Parent=NC_001136.8:RAD55;locus_tag=YDR076W;note=Rad55p;experiment=experimental evidence%2C no additional details recorded;product=Protein that stimulates strand exchange by stabilizing the binding of Rad51p to sin
chr04	0.412094	0.882556	600790	+	ID=NC_001136.8:SED1:unknown_transcript_1;Parent=NC_001136.8:SED1;locus_tag=YDR077W;note=Sed1p;experiment=experimental evidence%2C no additional details recorded;product=Major stress-induced structural GPI-cell wall glycoprotein in stationary-phase cells%2
chr04	0.864513	0.590381	602866	-	ID=NC_001136.8:SHU2:unknown_transcript_1;Parent=NC_001136.8:SHU2;locus_tag=YDR078C;note=Shu2p;experiment=experimental evidence%2C no additional details recorded;product=Protein of unassigned function involved in mutation suppression%2C important for error
chr04	0.959001	0.893025	603061	+	ID=NC_001136.8:PET100:unknown_transcript_1;Parent=NC_001136.8:PET100;locus_tag=YDR079W;note=Pet100p;experiment=experimental evidence%2C no additional details recorded;product=Chaperone that specifically facilitates the assembly of cytochrome c oxidase%2C
chr04	0.921726	0.956145	603808	-	ID=NC_001136.8:TFB5:unknown_transcript_1;Parent=NC_001136.8:TFB5;locus_tag=YDR079C-A;note=Tfb5p;experiment=experimental evidence%2C no additional details recorded;product=Component of the RNA polymerase II general transcription and DNA repair factor TFIIH
chr04	0.876918	0.668404	604005	+	ID=NC_001136.8:VPS41:unknown_transcript_1;Parent=NC_001136.8:VPS41;locus_tag=YDR080W;gene_synonym=VPL20;gene_synonym=VAM2;gene_synonym=SVL2;gene_synonym=FET2;gene_synonym=CVT8;note=Vps41p;experiment=experimental evidence%2C no additional details recorded;
chr04	0.880702	0.962586	610078	-	ID=NC_001136.8:PDC2:unknown_transcript_1;Parent=NC_001136.8:PDC2;locus_tag=YDR081C;note=Transcription factor required for the synthesis of the glycolytic enzyme pyruvate decarboxylase%2C required for high level expression of both the THI and the PDC genes
chr04	0.701127	0.785797	610438	+	ID=NC_001136.8:STN1:unknown_transcript_1;Parent=NC_001136.8:STN1;locus_tag=YDR082W;note=Telomere end-binding and capping protein%2C plays a key role with Pol12p in linking telomerase action with completion of lagging strand synthesis%2C and in a regulator
chr04	0.914305	0.939247	612070	+	ID=NC_001136.8:RRP8:unknown_transcript_1;Parent=NC_001136.8:RRP8;locus_tag=YDR083W;note=Rrp8p;experiment=experimental evidence%2C no additional details recorded;product=Nucleolar protein involved in rRNA processing%2C pre-rRNA cleavage at site A2%3B also
chr04	0.806127	0.909673	614001	-	ID=NC_001136.8:TVP23:unknown_transcript_1;Parent=NC_001136.8:TVP23;locus_tag=YDR084C;note=Tvp23p;experiment=experimental evidence%2C no additional details recorded;product=Integral membrane protein localized to late Golgi vesicles along with the v-SNARE T
chr04	0.941401	0.834192	616147	-	ID=NC_001136.8:AFR1:unknown_transcript_1;Parent=NC_001136.8:AFR1;locus_tag=YDR085C;note=Alpha-factor pheromone receptor regulator%2C negatively regulates pheromone receptor signaling%3B required for normal mating projection %28shmoo%29 formation%3B requir
chr04	0.848755	0.84064	617167	-	ID=NC_001136.8:SSS1:unknown_transcript_1;Parent=NC_001136.8:SSS1;locus_tag=YDR086C;note=Subunit of the Sec61p translocation complex %28Sec61p-Sss1p-Sbh1p%29 that forms a channel for passage of secretory proteins through the endoplasmic reticulum membrane%
chr04	0.92749	0.954899	618303	-	ID=NC_001136.8:RRP1:unknown_transcript_1;Parent=NC_001136.8:RRP1;locus_tag=YDR087C;note=Rrp1p;experiment=experimental evidence%2C no additional details recorded;product=Essential evolutionarily conserved nucleolar protein necessary for biogenesis of 60S r
chr04	0.635185	0.947177	619642	-	ID=NC_001136.8:SLU7:unknown_transcript_1;Parent=NC_001136.8:SLU7;locus_tag=YDR088C;gene_synonym=SLT17;note=Slu7p;experiment=experimental evidence%2C no additional details recorded;product=RNA splicing factor%2C required for ATP-independent portion of 2nd
chr04	0.772961	0.828379	622109	+	locus_tag=YDR089W;note=Ydr089wp;inference=non-experimental evidence%2C no additional details recorded;product=Protein of unknown function%3B deletion confers resistance to Nickel;protein_id=NP_010374.1;db_xref=SGD:S000002496;db_xref=GI:6320294;db_xref=Gen
chr04	0.90196	0.972401	625995	-	locus_tag=YDR090C;note=Ydr090cp;inference=non-experimental evidence%2C no additional details recorded;product=Putative protein of unknown function;protein_id=NP_010375.1;db_xref=SGD:S000002497;db_xref=GI:6320295;db_xref=GeneID:851664;exon_number=1
chr04	0.948759	0.953248	628531	-	ID=NC_001136.8:RLI1:unknown_transcript_1;Parent=NC_001136.8:RLI1;locus_tag=YDR091C;note=Rli1p;experiment=experimental evidence%2C no additional details recorded;product=Essential iron-sulfur protein required for ribosome biogenesis and translation initiat
chr04	0.372472	0.525623	629873	+	ID=NC_001136.8:UBC13:unknown_transcript_1;Parent=NC_001136.8:UBC13;locus_tag=YDR092W;EC_number=6.3.2.19;note=Ubiquitin-conjugating enzyme involved in the error-free DNA postreplication repair pathway%3B interacts with Mms2p to assemble ubiquitin chains at
chr04	0.737342	0.725755	631279	+	ID=NC_001136.8:DNF2:unknown_transcript_1;Parent=NC_001136.8:DNF2;locus_tag=YDR093W;EC_number=3.6.3.8;note=Dnf2p;experiment=experimental evidence%2C no additional details recorded;product=Aminophospholipid translocase %28flippase%29 that localizes primaril
chr04	0.886205	0.932902	637136	+	ID=NC_001136.8:GIS1:unknown_transcript_1;Parent=NC_001136.8:GIS1;locus_tag=YDR096W;note=JmjC domain-containing histone demethylase%3B transcription factor involved in the expression of genes during nutrient limitation%3B also involved in the negative regu
chr04	0.876233	0.946549	643834	-	ID=NC_001136.8:MSH6:unknown_transcript_1;Parent=NC_001136.8:MSH6;locus_tag=YDR097C;gene_synonym=PMS3;note=Protein required for mismatch repair in mitosis and meiosis%2C forms a complex with Msh2p to repair both single-base %26 insertion-deletion mispairs%
chr04	0.91637	0.969682	645032	-	ID=NC_001136.8:GRX3:unknown_transcript_1;Parent=NC_001136.8:GRX3;locus_tag=YDR098C;note=Hydroperoxide and superoxide-radical responsive glutathione-dependent oxidoreductase%3B monothiol glutaredoxin subfamily member along with Grx4p and Grx5p%3B protects
chr04	0.861404	0.955935	651123	-	locus_tag=YDR098C-B;note=Ydr098c-bp;inference=non-experimental evidence%2C no additional details recorded;product=Retrotransposon TYA Gag and TYB Pol genes%3B transcribed%2Ftranslated as one unit%3B polyprotein is processed to make a nucleocapsid-like pro
chr04	0.861404	0.955936	651123	-	locus_tag=YDR098C-A;note=Ydr098c-ap;inference=non-experimental evidence%2C no additional details recorded;product=Retrotransposon TYA Gag gene co-transcribed with TYB Pol%3B translated as TYA or TYA-TYB polyprotein%3B Gag is a nucleocapsid protein that is
chr04	0.864805	0.963564	653604	+	ID=NC_001136.8:BMH2:unknown_transcript_1;Parent=NC_001136.8:BMH2;locus_tag=YDR099W;gene_synonym=SCD3;note=Bmh2p;experiment=experimental evidence%2C no additional details recorded;product=14-3-3 protein%2C minor isoform%3B controls proteome at post-transcr
chr04	0.951555	0.92162	655010	+	ID=NC_001136.8:TVP15:unknown_transcript_1;Parent=NC_001136.8:TVP15;locus_tag=YDR100W;note=Tvp15p;experiment=experimental evidence%2C no additional details recorded;product=Integral membrane protein localized to late Golgi vesicles along with the v-SNARE T
chr04	0.912394	0.93613	657464	-	ID=NC_001136.8:ARX1:unknown_transcript_1;Parent=NC_001136.8:ARX1;locus_tag=YDR101C;note=Shuttling pre-60S factor%3B involved in the biogenesis of ribosomal large subunit biogenesis%3B interacts directly with Alb1%3B responsible for Tif6 recycling defects
chr04	0.883789	0.908209	658347	+	ID=NC_001136.8:STE5:unknown_transcript_1;Parent=NC_001136.8:STE5;locus_tag=YDR103W;gene_synonym=NUL3;gene_synonym=HMD3;note=Ste5p;experiment=experimental evidence%2C no additional details recorded;product=Pheromone-response scaffold protein%3B binds kinas
chr04	0.75492	0.825993	664907	-	ID=NC_001136.8:SPO71:unknown_transcript_1;Parent=NC_001136.8:SPO71;locus_tag=YDR104C;note=Spo71p;experiment=experimental evidence%2C no additional details recorded;product=Meiosis-specific protein of unknown function%2C required for spore wall formation d
chr04	0.896611	0.980886	666767	-	ID=NC_001136.8:TMS1:unknown_transcript_1;Parent=NC_001136.8:TMS1;locus_tag=YDR105C;note=Vacuolar membrane protein of unknown function that is conserved in mammals%3B predicted to contain eleven transmembrane helices%3B interacts with Pdr5p%2C a protein in
chr04	0.894385	0.865872	667001	+	ID=NC_001136.8:ARP10:unknown_transcript_1;Parent=NC_001136.8:ARP10;locus_tag=YDR106W;note=Component of the dynactin complex%2C localized to the pointed end of the Arp1p filament%3B may regulate membrane association of the complex;experiment=experimental e
chr04	0.826432	0.909762	671031	-	ID=NC_001136.8:TMN2:unknown_transcript_1;Parent=NC_001136.8:TMN2;locus_tag=YDR107C;note=Tmn2p;experiment=experimental evidence%2C no additional details recorded;product=Multispanning membrane protein of unknown function;protein_id=NP_010392.1;db_xref=SGD:
chr04	0.884426	0.828923	671266	+	ID=NC_001136.8:GSG1:unknown_transcript_1;Parent=NC_001136.8:GSG1;locus_tag=YDR108W;gene_synonym=MUM1;gene_synonym=TRS85;note=Subunit of TRAPP %28transport protein particle%29%2C a multi-subunit complex involved in targeting and%2For fusion of ER-to-Golgi
chr04	0.954396	0.952291	675664	-	locus_tag=YDR109C;note=Ydr109cp;inference=non-experimental evidence%2C no additional details recorded;product=Putative kinase;protein_id=NP_010394.1;db_xref=SGD:S000002516;db_xref=GI:6320314;db_xref=GeneID:851687;exon_number=1
chr04	0.986082	0.974555	676099	+	ID=NC_001136.8:FOB1:unknown_transcript_1;Parent=NC_001136.8:FOB1;locus_tag=YDR110W;gene_synonym=HRM1;note=Nucleolar protein required for DNA replication fork blocking and recombinational hotspot activities%3B binds to the replication fork barrier site in
chr04	0.917277	0.877344	679761	-	ID=NC_001136.8:ALT2:unknown_transcript_1;Parent=NC_001136.8:ALT2;locus_tag=YDR111C;EC_number=2.6.1.2;note=Putative alanine transaminase %28glutamic pyruvic transaminase%29;experiment=experimental evidence%2C no additional details recorded;product=Alt2p;pr
chr04	0.861207	0.948749	681614	-	ID=NC_001136.8:PDS1:unknown_transcript_1;Parent=NC_001136.8:PDS1;locus_tag=YDR113C;note=Securin that inhibits anaphase by binding separin Esp1p%2C also blocks cyclin destruction and mitotic exit%2C essential for cell cycle arrest in mitosis in the presenc
chr04	0.889221	0.963311	682172	+	locus_tag=YDR115W;note=Ydr115wp;inference=non-experimental evidence%2C no additional details recorded;product=Putative mitochondrial ribosomal protein of the large subunit%2C has similarity to E. coli L34 ribosomal protein%3B required for respiratory grow
chr04	0.800818	0.825193	682223	-	locus_tag=YDR114C;note=Ydr114cp;inference=non-experimental evidence%2C no additional details recorded;product=Putative protein of unknown function%3B deletion mutant exhibits poor growth at elevated pH and calcium;protein_id=NP_010399.1;db_xref=SGD:S00000
chr04	0.410578	0.900115	683578	-	ID=NC_001136.8:MRPL1:unknown_transcript_1;Parent=NC_001136.8:MRPL1;locus_tag=YDR116C;note=Mrpl1p;experiment=experimental evidence%2C no additional details recorded;product=Mitochondrial ribosomal protein of the large subunit;protein_id=NP_010401.1;db_xref
chr04	0.794929	0.903519	685640	-	ID=NC_001136.8:TMA64:unknown_transcript_1;Parent=NC_001136.8:TMA64;locus_tag=YDR117C;note=Tma64p;experiment=experimental evidence%2C no additional details recorded;product=Protein of unknown function that associates with ribosomes%3B has a putative RNA bi
chr04	0.688024	0.921314	685879	+	ID=NC_001136.8:APC4:unknown_transcript_1;Parent=NC_001136.8:APC4;locus_tag=YDR118W;note=Subunit of the Anaphase-Promoting Complex%2FCyclosome %28APC%2FC%29%2C which is a ubiquitin-protein ligase required for degradation of anaphase inhibitors%2C including
chr04	0.888822	0.90549	688224	+	locus_tag=YDR119W;note=Ydr119wp;inference=non-experimental evidence%2C no additional details recorded;product=Putative protein of unknown function%3B green fluorescent protein %28GFP%29-fusion protein localizes to vacuolar membrane%3B YDR119W is not an es
chr04	0.690423	0.824704	691011	+	locus_tag=YDR119W-A;note=Ydr119w-ap;inference=non-experimental evidence%2C no additional details recorded;product=Putative protein of unknown function;protein_id=NP_001032575.1;db_xref=SGD:S000113555;db_xref=GI:82795245;db_xref=GeneID:3799970;exon_number=
chr04	0.960201	0.969982	693258	-	ID=NC_001136.8:TRM1:unknown_transcript_1;Parent=NC_001136.8:TRM1;locus_tag=YDR120C;EC_number=2.1.1.32;note=tRNA methyltransferase%2C localizes to both the nucleus and mitochondrion to produce the modified base N2%2CN2-dimethylguanosine in tRNAs in both co
chr04	0.652703	0.946732	693582	+	ID=NC_001136.8:DPB4:unknown_transcript_1;Parent=NC_001136.8:DPB4;locus_tag=YDR121W;note=Shared subunit of DNA polymerase %28II%29 epsilon and of ISW2%2FyCHRAC chromatin accessibility complex%3B involved in both chromosomal DNA replication and in inheritan
chr04	0.888496	0.956222	694697	+	ID=NC_001136.8:KIN1:unknown_transcript_1;Parent=NC_001136.8:KIN1;locus_tag=YDR122W;EC_number=2.7.1.-;note=Serine%2Fthreonine protein kinase involved in regulation of exocytosis%3B localizes to the cytoplasmic face of the plasma membrane%3B closely related
chr04	0.852669	0.905022	699465	-	ID=NC_001136.8:INO2:unknown_transcript_1;Parent=NC_001136.8:INO2;locus_tag=YDR123C;gene_synonym=SCS1;gene_synonym=DIE1;note=Ino2p;experiment=experimental evidence%2C no additional details recorded;product=Component of the heteromeric Ino2p%2FIno4p basic h
chr04	0.834535	0.849332	700312	+	locus_tag=YDR124W;note=Ydr124wp;inference=non-experimental evidence%2C no additional details recorded;product=Putative protein of unknown function%3B non-essential gene%3B expression is strongly induced by alpha factor;protein_id=NP_010409.1;db_xref=SGD:S
chr04	0.772639	0.950323	702755	-	ID=NC_001136.8:ECM18:unknown_transcript_1;Parent=NC_001136.8:ECM18;locus_tag=YDR125C;note=Protein of unknown function%2C similar to Rlp24p;experiment=experimental evidence%2C no additional details recorded;product=Ecm18p;protein_id=NP_010410.1;db_xref=SGD
chr04	0.796891	0.893894	703231	+	ID=NC_001136.8:SWF1:unknown_transcript_1;Parent=NC_001136.8:SWF1;locus_tag=YDR126W;gene_synonym=PSL10;note=Swf1p;experiment=experimental evidence%2C no additional details recorded;product=Palmitoyltransferase that acts on the SNAREs Snc1p%2C Syn8p%2C Tlg1
chr04	0.818819	0.960728	704481	+	ID=NC_001136.8:ARO1:unknown_transcript_1;Parent=NC_001136.8:ARO1;locus_tag=YDR127W;EC_number=4.2.1.10;note=Pentafunctional arom protein%2C catalyzes steps 2 through 6 in the biosynthesis of chorismate%2C which is a precursor to aromatic amino acids;experi
chr04	0.826195	0.959856	709546	+	locus_tag=YDR128W;note=Ydr128wp;inference=non-experimental evidence%2C no additional details recorded;product=Putative protein of unknown function;protein_id=NP_010413.1;db_xref=SGD:S000002535;db_xref=GI:6320333;db_xref=GeneID:851706;exon_number=1
chr04	0.767026	0.871849	715376	-	ID=NC_001136.8:SAC6:unknown_transcript_1;Parent=NC_001136.8:SAC6;locus_tag=YDR129C;gene_synonym=ABP67;note=Sac6p;experiment=experimental evidence%2C no additional details recorded;product=Fimbrin%2C actin-bundling protein%3B cooperates with Scp1p %28calpo
chr04	0.852328	0.942893	716619	-	ID=NC_001136.8:FIN1:unknown_transcript_1;Parent=NC_001136.8:FIN1;locus_tag=YDR130C;note=Spindle pole body-related intermediate filament protein%2C forms cell cycle-specific filaments between spindle pole bodies in mother and daughter cells%2C able to self
chr04	0.920327	0.952666	718457	-	locus_tag=YDR131C;note=Ydr131cp;inference=non-experimental evidence%2C no additional details recorded;product=F-box protein%2C substrate-specific adaptor subunit that recruits substrates to a core ubiquitination complex;protein_id=NP_010416.1;db_xref=SGD:
chr04	0.725297	0.952379	720300	-	locus_tag=YDR132C;note=Ydr132cp;inference=non-experimental evidence%2C no additional details recorded;product=Putative protein of unknown function;protein_id=NP_010417.1;db_xref=SGD:S000002539;db_xref=GI:6320337;db_xref=GeneID:851710;exon_number=1
chr04	0.863909	0.958976	727548	-	ID=NC_001136.8:YCF1:unknown_transcript_1;Parent=NC_001136.8:YCF1;locus_tag=YDR135C;note=Ycf1p;experiment=experimental evidence%2C no additional details recorded;product=Vacuolar glutathione S-conjugate transporter of the ATP-binding cassette family%2C has
chr04	0.7587	0.958415	728256	+	ID=NC_001136.8:RGP1:unknown_transcript_1;Parent=NC_001136.8:RGP1;locus_tag=YDR137W;note=Subunit of a Golgi membrane exchange factor %28Ric1p-Rgp1p%29 that catalyzes nucleotide exchange on Ypt6p;experiment=experimental evidence%2C no additional details rec
chr04	0.945776	0.94859	730575	+	ID=NC_001136.8:HPR1:unknown_transcript_1;Parent=NC_001136.8:HPR1;locus_tag=YDR138W;gene_synonym=TRF1;note=Subunit of THO%2FTREX complexes that couple transcription elongation with mitotic recombination and with mRNA metabolism and export%2C subunit of an
chr04	0.855845	0.898389	733921	-	ID=NC_001136.8:RUB1:unknown_transcript_1;Parent=NC_001136.8:RUB1;locus_tag=YDR139C;note=Ubiquitin-like protein with similarity to mammalian NEDD8%3B conjugation %28neddylation%29 substrates include the cullins Cdc53p%2C Rtt101p%2C and Cul3p%3B activated b
chr04	0.843824	0.906929	734135	+	ID=NC_001136.8:MTQ2:unknown_transcript_1;Parent=NC_001136.8:MTQ2;locus_tag=YDR140W;note=S-adenosylmethionine-dependent methyltransferase of the seven beta-strand family%3B methylates release factor eRF1 %28Sup45p%29 in vitro%3B is not an essential gene%3B
chr04	0.882796	0.954119	739994	-	ID=NC_001136.8:DOP1:unknown_transcript_1;Parent=NC_001136.8:DOP1;locus_tag=YDR141C;note=Protein of unknown function%2C essential for viability%2C involved in establishing cellular polarity and morphogenesis%3B the authentic%2C non-tagged protein is detect
chr04	0.927753	0.898275	741597	-	ID=NC_001136.8:PEX7:unknown_transcript_1;Parent=NC_001136.8:PEX7;locus_tag=YDR142C;gene_synonym=PEB1;gene_synonym=PAS7;note=Pex7p;experiment=experimental evidence%2C no additional details recorded;product=Peroxisomal signal receptor for the N-terminal non
chr04	0.810982	0.584633	743871	-	ID=NC_001136.8:SAN1:unknown_transcript_1;Parent=NC_001136.8:SAN1;locus_tag=YDR143C;note=Ubiquitin-protein ligase%2C involved in the proteasome-dependent degradation of aberrant nuclear proteins;experiment=experimental evidence%2C no additional details rec
chr04	0.952607	0.933701	746098	-	ID=NC_001136.8:MKC7:unknown_transcript_1;Parent=NC_001136.8:MKC7;locus_tag=YDR144C;gene_synonym=YPS2;note=Mkc7p;experiment=experimental evidence%2C no additional details recorded;product=GPI-anchored aspartyl protease %28yapsin%29 involved in protein proc
chr04	0.93998	0.953668	746735	+	ID=NC_001136.8:TAF12:unknown_transcript_1;Parent=NC_001136.8:TAF12;locus_tag=YDR145W;gene_synonym=TAF68;gene_synonym=TAF61;note=Taf12p;experiment=experimental evidence%2C no additional details recorded;product=Subunit %2861%2F68 kDa%29 of TFIID and SAGA c
chr04	0.686676	0.96953	750739	-	ID=NC_001136.8:SWI5:unknown_transcript_1;Parent=NC_001136.8:SWI5;locus_tag=YDR146C;note=Transcription factor that activates transcription of genes expressed at the M%2FG1 phase boundary and in G1 phase%3B localization to the nucleus occurs during G1 and a
chr04	0.837763	0.969823	751628	+	ID=NC_001136.8:EKI1:unknown_transcript_1;Parent=NC_001136.8:EKI1;locus_tag=YDR147W;note=Ethanolamine kinase%2C primarily responsible for phosphatidylethanolamine synthesis via the CDP-ethanolamine pathway%3B exhibits some choline kinase activity%2C thus c
chr04	0.946467	0.90793	755063	-	ID=NC_001136.8:KGD2:unknown_transcript_1;Parent=NC_001136.8:KGD2;locus_tag=YDR148C;EC_number=2.3.1.61;note=Kgd2p;experiment=experimental evidence%2C no additional details recorded;product=Dihydrolipoyl transsuccinylase%2C component of the mitochondrial al
chr04	0.856655	0.903761	755625	+	ID=NC_001136.8:NUM1:unknown_transcript_1;Parent=NC_001136.8:NUM1;locus_tag=YDR150W;gene_synonym=PAC12;note=Protein required for nuclear migration%2C localizes to the mother cell cortex and the bud tip%3B may mediate interactions of dynein and cytoplasmic
chr04	0.63988	0.829646	765152	-	ID=NC_001136.8:CTH1:unknown_transcript_1;Parent=NC_001136.8:CTH1;locus_tag=YDR151C;note=Member of the CCCH zinc finger family%3B has similarity to mammalian Tis11 protein%2C which activates transcription and also has a role in mRNA degradation%3B may func
chr04	0.928927	0.959317	765703	+	ID=NC_001136.8:GIR2:unknown_transcript_1;Parent=NC_001136.8:GIR2;locus_tag=YDR152W;note=Highly-acidic cytoplasmic RWD domain-containing protein of unknown function%2C sensitive to proteolysis%2C N-terminal region has high content of acidic amino acid resi
chr04	0.731318	0.921491	767968	-	ID=NC_001136.8:ENT5:unknown_transcript_1;Parent=NC_001136.8:ENT5;locus_tag=YDR153C;note=Protein containing an N-terminal epsin-like domain involved in clathrin recruitment and traffic between the Golgi and endosomes%3B associates with the clathrin adaptor
chr04	0.858338	0.730311	768997	-	ID=NC_001136.8:CPR1:unknown_transcript_1;Parent=NC_001136.8:CPR1;locus_tag=YDR155C;gene_synonym=CPH1;gene_synonym=CYP1;EC_number=5.2.1.8;note=Cytoplasmic peptidyl-prolyl cis-trans isomerase %28cyclophilin%29%2C catalyzes the cis-trans isomerization of pep
chr04	0.793547	0.665702	769522	+	ID=NC_001136.8:RPA14:unknown_transcript_1;Parent=NC_001136.8:RPA14;locus_tag=YDR156W;EC_number=2.7.7.6;note=Rpa14p;experiment=experimental evidence%2C no additional details recorded;product=RNA polymerase I subunit A14;protein_id=NP_010440.1;db_xref=SGD:S
chr04	0.738895	0.876064	770354	+	ID=NC_001136.8:HOM2:unknown_transcript_1;Parent=NC_001136.8:HOM2;locus_tag=YDR158W;EC_number=1.2.1.11;note=Hom2p;experiment=experimental evidence%2C no additional details recorded;product=Aspartic beta semi-aldehyde dehydrogenase%2C catalyzes the second s
chr04	0.873546	0.638828	771874	+	ID=NC_001136.8:SAC3:unknown_transcript_1;Parent=NC_001136.8:SAC3;locus_tag=YDR159W;gene_synonym=LEP1;note=Sac3p;experiment=experimental evidence%2C no additional details recorded;product=Nuclear pore-associated protein%2C forms a complex with Thp1p that i
chr04	0.629412	0.968221	776160	+	ID=NC_001136.8:SSY1:unknown_transcript_1;Parent=NC_001136.8:SSY1;locus_tag=YDR160W;gene_synonym=SHR10;note=Ssy1p;experiment=experimental evidence%2C no additional details recorded;product=Component of the SPS plasma membrane amino acid sensor system %28Ss
chr04	0.930906	0.891384	779040	+	locus_tag=YDR161W;note=Ydr161wp;inference=non-experimental evidence%2C no additional details recorded;product=Putative protein of unknown function%3B non-essential gene%3B proposed function in rRNA and ribosome biosynthesis based on transcriptional co-reg
chr04	0.967302	0.984347	781097	-	ID=NC_001136.8:NBP2:unknown_transcript_1;Parent=NC_001136.8:NBP2;locus_tag=YDR162C;note=Protein involved in the HOG %28high osmolarity glycerol%29 pathway%2C negatively regulates Hog1p by recruitment of phosphatase Ptc1p the Pbs2p-Hog1p complex%2C found i
chr04	0.776724	0.883513	781420	+	ID=NC_001136.8:CWC15:unknown_transcript_1;Parent=NC_001136.8:CWC15;locus_tag=YDR163W;note=Non-essential protein involved in pre-mRNA splicing%2C component of a complex containing Cef1p%3B has similarity to S. pombe Cwf15p;experiment=experimental evidence%
chr04	0.981949	0.910606	784212	-	ID=NC_001136.8:SEC1:unknown_transcript_1;Parent=NC_001136.8:SEC1;locus_tag=YDR164C;note=Sm-like protein involved in docking and fusion of exocytic vesicles through binding to assembled SNARE complexes at the membrane%3B localization to sites of secretion
chr04	0.976404	0.916811	784868	+	ID=NC_001136.8:TRM82:unknown_transcript_1;Parent=NC_001136.8:TRM82;locus_tag=YDR165W;note=Trm82p;experiment=experimental evidence%2C no additional details recorded;product=Subunit of a tRNA methyltransferase complex composed of Trm8p and Trm82p that catal
chr04	0.966453	0.8317	789218	-	ID=NC_001136.8:SEC5:unknown_transcript_1;Parent=NC_001136.8:SEC5;locus_tag=YDR166C;note=Sec5p;experiment=experimental evidence%2C no additional details recorded;product=Essential 107kDa subunit of the exocyst complex %28Sec3p%2C Sec5p%2C Sec6p%2C Sec8p%2C
chr04	0.656492	0.7559	789446	+	ID=NC_001136.8:TAF10:unknown_transcript_1;Parent=NC_001136.8:TAF10;locus_tag=YDR167W;gene_synonym=TAF25;gene_synonym=TAF23;note=Taf10p;experiment=experimental evidence%2C no additional details recorded;product=Subunit %28145 kDa%29 of TFIID and SAGA compl
chr04	0.967369	0.82311	790325	+	ID=NC_001136.8:CDC37:unknown_transcript_1;Parent=NC_001136.8:CDC37;locus_tag=YDR168W;gene_synonym=SMO1;note=Essential Hsp90p co-chaperone%3B necessary for passage through the START phase of the cell cycle%3B stabilizes protein kinase nascent chains and pa
chr04	0.89792	0.84442	793886	-	ID=NC_001136.8:STB3:unknown_transcript_1;Parent=NC_001136.8:STB3;locus_tag=YDR169C;note=Stb3p;experiment=experimental evidence%2C no additional details recorded;product=Protein that binds Sin3p in a two-hybrid assay;protein_id=NP_010453.1;db_xref=SGD:S000
chr04	0.871838	0.878303	794720	-	locus_tag=YDR169C-A;note=Ydr169c-ap;inference=non-experimental evidence%2C no additional details recorded;product=Putative protein of unknown function%3B identified by fungal homology and RT-PCR;protein_id=NP_878062.1;db_xref=SGD:S000028538;db_xref=GI:334
chr04	0.79926	0.826967	802219	-	ID=NC_001136.8:SEC7:unknown_transcript_1;Parent=NC_001136.8:SEC7;locus_tag=YDR170C;note=Sec7p;experiment=experimental evidence%2C no additional details recorded;product=Guanine nucleotide exchange factor %28GEF%29 for ADP ribosylation factors involved in
chr04	0.806825	0.855565	803192	+	locus_tag=YDR170W-A;note=Ydr170w-ap;inference=non-experimental evidence%2C no additional details recorded;product=Retrotransposon TYA Gag gene%3B Gag is a nucleocapsid protein that is the structural constituent of virus-like particles %28VLPs%29%3B simila
chr04	0.913917	0.809244	806618	+	ID=NC_001136.8:HSP42:unknown_transcript_1;Parent=NC_001136.8:HSP42;locus_tag=YDR171W;note=Small heat shock protein %28sHSP%29 with chaperone activity%3B forms barrel-shaped oligomers that suppress unfolded protein aggregation%3B involved in cytoskeleton r
chr04	0.941987	0.945816	808321	+	ID=NC_001136.8:SUP35:unknown_transcript_1;Parent=NC_001136.8:SUP35;locus_tag=YDR172W;gene_synonym=SUP36;gene_synonym=SUP2;gene_synonym=SUF12;gene_synonym=SAL3;gene_synonym=PNM2;gene_synonym=GST1;note=Translation termination factor eRF3%3B altered protein
chr04	0.818284	0.829182	811629	-	ID=NC_001136.8:ARG82:unknown_transcript_1;Parent=NC_001136.8:ARG82;locus_tag=YDR173C;gene_synonym=IPK2;gene_synonym=ARGR3;note=Inositol polyphosphate multikinase %28IPMK%29%2C sequentially phosphorylates Ins%281%2C4%2C5%29P3 to form Ins%281%2C3%2C4%2C5%2C
chr04	0.840799	0.788497	812107	+	ID=NC_001136.8:HMO1:unknown_transcript_1;Parent=NC_001136.8:HMO1;locus_tag=YDR174W;gene_synonym=HSM2;note=Hmo1p;experiment=experimental evidence%2C no additional details recorded;product=Chromatin associated high mobility group %28HMG%29 family member inv
chr04	0.661228	0.501509	814149	-	ID=NC_001136.8:RSM24:unknown_transcript_1;Parent=NC_001136.8:RSM24;locus_tag=YDR175C;note=Rsm24p;experiment=experimental evidence%2C no additional details recorded;product=Mitochondrial ribosomal protein of the small subunit;protein_id=NP_010460.1;db_xref
chr04	0.676967	0.669869	814449	+	ID=NC_001136.8:NGG1:unknown_transcript_1;Parent=NC_001136.8:NGG1;locus_tag=YDR176W;gene_synonym=SWI7;gene_synonym=ADA3;note=Transcriptional regulator involved in glucose repression of Gal4p-regulated genes%3B component of transcriptional adaptor and histo
chr04	0.690951	0.804858	816875	+	ID=NC_001136.8:UBC1:unknown_transcript_1;Parent=NC_001136.8:UBC1;locus_tag=YDR177W;EC_number=6.3.2.19;note=Ubiquitin-conjugating enzyme that mediates selective degradation of short-lived and abnormal proteins%3B plays a role in vesicle biogenesis and ER-a
chr04	0.699684	0.793235	817947	+	ID=NC_001136.8:SDH4:unknown_transcript_1;Parent=NC_001136.8:SDH4;locus_tag=YDR178W;gene_synonym=ACN18;note=Sdh4p;experiment=experimental evidence%2C no additional details recorded;product=Membrane anchor subunit of succinate dehydrogenase %28Sdh1p%2C Sdh2
chr04	0.7834	0.921295	819193	-	ID=NC_001136.8:CSN9:unknown_transcript_1;Parent=NC_001136.8:CSN9;locus_tag=YDR179C;note=Subunit of the Cop9 signalosome%2C which is required for deneddylation%2C or removal of the ubiquitin-like protein Rub1p from Cdc53p %28cullin%29%3B involved in adapta
chr04	0.92214	0.891268	819430	+	locus_tag=YDR179W-A;note=Ydr179w-ap;inference=non-experimental evidence%2C no additional details recorded;product=Putative protein of unknown function;protein_id=NP_010465.2;db_xref=SGD:S000002587;db_xref=GI:50593140;db_xref=GeneID:851760;exon_number=1
chr04	0.919516	0.953212	821292	+	ID=NC_001136.8:SCC2:unknown_transcript_1;Parent=NC_001136.8:SCC2;locus_tag=YDR180W;note=Subunit of cohesin loading factor %28Scc2p-Scc4p%29%2C a complex required for the loading of cohesin complexes onto chromosomes%3B involved in establishing sister chro
chr04	0.818893	0.953658	827352	-	ID=NC_001136.8:SAS4:unknown_transcript_1;Parent=NC_001136.8:SAS4;locus_tag=YDR181C;note=Subunit of the SAS complex %28Sas2p%2C Sas4p%2C Sas5p%29%2C which acetylates free histones and nucleosomes and regulates transcriptional silencing%3B required for the
chr04	0.840119	0.867727	827579	+	ID=NC_001136.8:CDC1:unknown_transcript_1;Parent=NC_001136.8:CDC1;locus_tag=YDR182W;gene_synonym=ESP2;gene_synonym=DSR1;gene_synonym=DSC1;note=Putative membrane protein of unknown function involved in Mn2%2B homeostasis%3B mutants display actin and general
chr04	0.662575	0.881471	829148	+	locus_tag=YDR182W-A;note=Ydr182w-ap;inference=non-experimental evidence%2C no additional details recorded;product=Putative protein of unknown function%3B identified by fungal homology and RT-PCR;protein_id=NP_878063.1;db_xref=SGD:S000028539;db_xref=GI:334
chr04	0.894462	0.978227	829582	+	ID=NC_001136.8:PLP1:unknown_transcript_1;Parent=NC_001136.8:PLP1;locus_tag=YDR183W;note=Protein with a possible role in folding of beta-tubulin%3B has weak similarity to phosducins%2C which are G-protein regulators;experiment=experimental evidence%2C no a
chr04	0.872229	0.858038	831510	-	ID=NC_001136.8:ATC1:unknown_transcript_1;Parent=NC_001136.8:ATC1;locus_tag=YDR184C;gene_synonym=LIC4;note=Nuclear protein%2C possibly involved in regulation of cation stress responses and%2For in the establishment of bipolar budding pattern;experiment=exp
chr04	0.910325	0.938895	832470	-	locus_tag=YDR185C;note=Ydr185cp;inference=non-experimental evidence%2C no additional details recorded;product=Mitochondrial protein of unknown function%3B has similarity to Ups1p%2C which is involved in regulation of alternative topogenesis of the dynamin
chr04	0.276944	0.696749	835489	-	locus_tag=YDR186C;note=Ydr186cp;inference=non-experimental evidence%2C no additional details recorded;product=Putative protein of unknown function%3B may interact with ribosomes%2C based on co-purification experiments%3B green fluorescent protein %28GFP%2
chr04	0.28018	0.715896	836418	+	ID=NC_001136.8:CCT6:unknown_transcript_1;Parent=NC_001136.8:CCT6;locus_tag=YDR188W;gene_synonym=TCP20;gene_synonym=TCP6;gene_synonym=HTR3;note=Subunit of the cytosolic chaperonin Cct ring complex%2C related to Tcp1p%2C essential protein that is required f
chr04	0.779438	0.906967	838389	+	ID=NC_001136.8:SLY1:unknown_transcript_1;Parent=NC_001136.8:SLY1;locus_tag=YDR189W;note=Sly1p;experiment=experimental evidence%2C no additional details recorded;product=Hydrophilic protein involved in vesicle trafficking between the ER and Golgi%3B SM %28
chr04	0.939377	0.956483	841992	-	ID=NC_001136.8:RVB1:unknown_transcript_1;Parent=NC_001136.8:RVB1;locus_tag=YDR190C;gene_synonym=TIP48;gene_synonym=TIH1;gene_synonym=TIP49A;note=Rvb1p;experiment=experimental evidence%2C no additional details recorded;product=Essential protein involved in
chr04	0.81266	0.942119	842334	+	ID=NC_001136.8:HST4:unknown_transcript_1;Parent=NC_001136.8:HST4;locus_tag=YDR191W;note=Member of the Sir2 family of NAD%28%2B%29-dependent protein deacetylases%3B involved along with Hst3p in silencing at telomeres%2C cell cycle progression%2C radiation
chr04	0.789984	0.930578	844858	-	ID=NC_001136.8:NUP42:unknown_transcript_1;Parent=NC_001136.8:NUP42;locus_tag=YDR192C;gene_synonym=UIP1;gene_synonym=RIP1;note=Subunit of the nuclear pore complex %28NPC%29 that localizes exclusively to the cytoplasmic side%3B involved in RNA export%2C mos
chr04	0.921174	0.960272	847943	-	ID=NC_001136.8:MSS116:unknown_transcript_1;Parent=NC_001136.8:MSS116;locus_tag=YDR194C;note=Mss116p;experiment=experimental evidence%2C no additional details recorded;product=DEAD-box protein required for efficient splicing of mitochondrial Group I and II
chr04	0.933282	0.934499	848068	+	locus_tag=YDR194W-A;note=Ydr194w-ap;inference=non-experimental evidence%2C no additional details recorded;product=Putative protein of unknown function%3B identified by fungal homology and RT-PCR;protein_id=NP_878064.1;db_xref=SGD:S000028541;db_xref=GI:334
chr04	0.872144	0.93887	848596	+	ID=NC_001136.8:REF2:unknown_transcript_1;Parent=NC_001136.8:REF2;locus_tag=YDR195W;note=Ref2p;experiment=experimental evidence%2C no additional details recorded;product=RNA-binding protein involved in the cleavage step of mRNA 3%27-end formation prior to
chr04	0.920173	0.89841	850996	-	locus_tag=YDR196C;note=Ydr196cp;inference=non-experimental evidence%2C no additional details recorded;product=Putative dephospho-CoA kinase %28DPCK%29 that catalyzes the final step in Coenzyme A biosynthesis%3B essential for viability%3B the authentic%2C
chr04	0.964658	0.928634	851225	+	ID=NC_001136.8:CBS2:unknown_transcript_1;Parent=NC_001136.8:CBS2;locus_tag=YDR197W;gene_synonym=CBP7;note=Mitochondrial translational activator of the COB mRNA%3B interacts with translating ribosomes%2C acts on the COB mRNA 5%27-untranslated leader;experi
chr04	0.874459	0.950995	853969	-	ID=NC_001136.8:RKM2:unknown_transcript_1;Parent=NC_001136.8:RKM2;locus_tag=YDR198C;note=Rkm2p;experiment=experimental evidence%2C no additional details recorded;product=Ribosomal protein lysine methyltransferase%2C responsible for epsilon-trimethylation o
chr04	0.897939	0.87488	856090	-	ID=NC_001136.8:VPS64:unknown_transcript_1;Parent=NC_001136.8:VPS64;locus_tag=YDR200C;gene_synonym=FAR9;note=Vps64p;experiment=experimental evidence%2C no additional details recorded;product=Cytoplasmic protein required for cytoplasm to vacuole targeting o
chr04	0.736709	0.892587	856314	+	ID=NC_001136.8:SPC19:unknown_transcript_1;Parent=NC_001136.8:SPC19;locus_tag=YDR201W;note=Spc19p;experiment=experimental evidence%2C no additional details recorded;product=Essential subunit of the Dam1 complex %28aka DASH complex%29%2C couples kinetochore
chr04	0.873736	0.934875	857950	-	ID=NC_001136.8:RAV2:unknown_transcript_1;Parent=NC_001136.8:RAV2;locus_tag=YDR202C;note=Subunit of RAVE %28Rav1p%2C Rav2p%2C Skp1p%29%2C a complex that associates with the V1 domain of the vacuolar membrane %28H%2B%29-ATPase %28V-ATPase%29 and promotes as
chr04	0.453798	0.813522	858134	+	ID=NC_001136.8:COQ4:unknown_transcript_1;Parent=NC_001136.8:COQ4;locus_tag=YDR204W;note=Protein with a role in ubiquinone %28Coenzyme Q%29 biosynthesis%2C possibly functioning in stabilization of Coq7p%3B located on the matrix face of the mitochondrial in
chr04	0.793269	0.933146	859343	+	ID=NC_001136.8:MSC2:unknown_transcript_1;Parent=NC_001136.8:MSC2;locus_tag=YDR205W;note=Msc2p;experiment=experimental evidence%2C no additional details recorded;product=Member of the cation diffusion facilitator family%2C localizes to the endoplasmic reti
chr04	0.819231	0.950881	862051	+	ID=NC_001136.8:EBS1:unknown_transcript_1;Parent=NC_001136.8:EBS1;locus_tag=YDR206W;note=Protein involved in inhibition of translation and nonsense-mediated decay%3B interacts with cap binding protein Cdc33p and with Nam7p%3B localizes to P-bodies upon glu
chr04	0.929828	0.984046	867519	-	ID=NC_001136.8:UME6:unknown_transcript_1;Parent=NC_001136.8:UME6;locus_tag=YDR207C;gene_synonym=RIM16;gene_synonym=NIM2;gene_synonym=CAR80;note=Ume6p;experiment=experimental evidence%2C no additional details recorded;product=Key transcriptional regulator
chr04	0.881478	0.936549	868221	+	ID=NC_001136.8:MSS4:unknown_transcript_1;Parent=NC_001136.8:MSS4;locus_tag=YDR208W;EC_number=2.7.1.68;note=Phosphatidylinositol-4-phosphate 5-kinase%2C involved in actin cytoskeleton organization and cell morphogenesis%3B multicopy suppressor of stt4 muta
chr04	0.904742	0.886615	871071	+	locus_tag=YDR210W;note=Ydr210wp;inference=non-experimental evidence%2C no additional details recorded;product=Protein of unknown function%3B green fluorescent protein %28GFP%29-fusion protein localizes to the cell periphery;protein_id=NP_010496.1;db_xref=
chr04	0.930424	0.966839	872109	+	locus_tag=YDR210W-B;note=Ydr210w-bp;inference=non-experimental evidence%2C no additional details recorded;product=Retrotransposon TYA Gag and TYB Pol genes%3B transcribed%2Ftranslated as one unit%3B polyprotein is processed to make a nucleocapsid-like pro
chr04	0.930424	0.966839	872109	+	locus_tag=YDR210W-A;note=Ydr210w-ap;inference=non-experimental evidence%2C no additional details recorded;product=Retrotransposon TYA Gag gene co-transcribed with TYB Pol%3B translated as TYA or TYA-TYB polyprotein%3B Gag is a nucleocapsid protein that is
chr04	0.484115	0.743014	883924	-	locus_tag=YDR210C-D;note=Ydr210c-dp;inference=non-experimental evidence%2C no additional details recorded;product=Retrotransposon TYA Gag and TYB Pol genes%3B transcribed%2Ftranslated as one unit%3B polyprotein is processed to make a nucleocapsid-like pro
chr04	0.484115	0.743014	883924	-	locus_tag=YDR210C-C;note=Ydr210c-cp;inference=non-experimental evidence%2C no additional details recorded;product=Retrotransposon TYA Gag gene co-transcribed with TYB Pol%3B translated as TYA or TYA-TYB polyprotein%3B Gag is a nucleocapsid protein that is
chr04	0.790831	0.974118	884724	+	ID=NC_001136.8:GCD6:unknown_transcript_1;Parent=NC_001136.8:GCD6;locus_tag=YDR211W;note=Gcd6p;experiment=experimental evidence%2C no additional details recorded;product=Catalytic epsilon subunit of the translation initiation factor eIF2B%2C the guanine-nu
chr04	0.811069	0.952532	887229	+	ID=NC_001136.8:TCP1:unknown_transcript_1;Parent=NC_001136.8:TCP1;locus_tag=YDR212W;gene_synonym=CCT1;note=Tcp1p;experiment=experimental evidence%2C no additional details recorded;product=Alpha subunit of chaperonin-containing T-complex%2C which mediates p
chr04	0.919938	0.91657	889748	+	ID=NC_001136.8:UPC2:unknown_transcript_1;Parent=NC_001136.8:UPC2;locus_tag=YDR213W;gene_synonym=MOX4;note=Upc2p;experiment=experimental evidence%2C no additional details recorded;product=Sterol regulatory element binding protein%2C induces transcription o
chr04	0.962787	0.883876	892872	+	ID=NC_001136.8:AHA1:unknown_transcript_1;Parent=NC_001136.8:AHA1;locus_tag=YDR214W;note=Co-chaperone that binds to Hsp82p and activates its ATPase activity%3B similar to Hch1p%3B expression is regulated by stresses such as heat shock;experiment=experiment
chr04	0.901597	0.854383	895031	+	ID=NC_001136.8:ADR1:unknown_transcript_1;Parent=NC_001136.8:ADR1;locus_tag=YDR216W;note=Carbon source-responsive zinc-finger transcription factor%2C required for transcription of the glucose-repressed gene ADH2%2C of peroxisomal protein genes%2C and of ge
chr04	0.888703	0.97116	903476	-	ID=NC_001136.8:RAD9:unknown_transcript_1;Parent=NC_001136.8:RAD9;locus_tag=YDR217C;note=Rad9p;experiment=experimental evidence%2C no additional details recorded;product=DNA damage-dependent checkpoint protein%2C required for cell-cycle arrest in G1%2FS%2C
chr04	0.453853	0.925161	905048	-	ID=NC_001136.8:SPR28:unknown_transcript_1;Parent=NC_001136.8:SPR28;locus_tag=YDR218C;note=Spr28p;experiment=experimental evidence%2C no additional details recorded;product=Sporulation-specific homolog of the yeast CDC3%2F10%2F11%2F12 family of bud neck mi
chr04	0.790597	0.941815	906848	-	ID=NC_001136.8:MFB1:unknown_transcript_1;Parent=NC_001136.8:MFB1;locus_tag=YDR219C;note=Mitochondria-associated F-box protein involved in maintenance of normal mitochondrial morphology%3B interacts with Skp1p through the F-box motif%3B preferentially loca
chr04	0.847251	0.877713	907326	+	ID=NC_001136.8:GTB1:unknown_transcript_1;Parent=NC_001136.8:GTB1;locus_tag=YDR221W;note=Gtb1p;experiment=experimental evidence%2C no additional details recorded;product=Glucosidase II beta subunit%2C forms a complex with alpha subunit Rot2p%2C involved in
chr04	0.840915	0.917996	910050	+	locus_tag=YDR222W;note=Ydr222wp;inference=non-experimental evidence%2C no additional details recorded;product=Protein of unknown function%3B green fluorescent protein %28GFP%29-fusion protein localizes to the cytoplasm in a punctate pattern;protein_id=NP_
chr04	0.813602	0.85528	912095	+	ID=NC_001136.8:CRF1:unknown_transcript_1;Parent=NC_001136.8:CRF1;locus_tag=YDR223W;note=Transcriptional corepressor involved in the regulation of ribosomal protein gene transcription via the TOR signaling pathway and protein kinase A%2C phosphorylated by
chr04	0.534379	0.603168	914708	-	ID=NC_001136.8:HTB1:unknown_transcript_1;Parent=NC_001136.8:HTB1;locus_tag=YDR224C;gene_synonym=SPT12;note=One of two nearly identical %28see HTB2%29 histone H2B subtypes required for chromatin assembly and chromosome function%3B Rad6p-Bre1p-Lge1p mediate
chr04	0.835054	0.781195	915526	+	ID=NC_001136.8:HTA1:unknown_transcript_1;Parent=NC_001136.8:HTA1;locus_tag=YDR225W;gene_synonym=SPT11;gene_synonym=H2A1;note=One of two nearly identical %28see also HTA2%29 histone H2A subtypes%3B core histone required for chromatin assembly and chromosom
chr04	0.808393	0.944435	916482	+	ID=NC_001136.8:ADK1:unknown_transcript_1;Parent=NC_001136.8:ADK1;locus_tag=YDR226W;gene_synonym=AKY2;gene_synonym=AKY1;EC_number=2.7.4.3;note=Adk1p;experiment=experimental evidence%2C no additional details recorded;product=Adenylate kinase%2C required for
chr04	0.454696	0.777209	917567	+	ID=NC_001136.8:SIR4:unknown_transcript_1;Parent=NC_001136.8:SIR4;locus_tag=YDR227W;gene_synonym=UTH2;gene_synonym=STE9;gene_synonym=ASD1;note=Sir4p;experiment=experimental evidence%2C no additional details recorded;product=Silent information regulator tha
chr04	0.845953	0.905218	923802	-	ID=NC_001136.8:PCF11:unknown_transcript_1;Parent=NC_001136.8:PCF11;locus_tag=YDR228C;note=mRNA 3%27 end processing factor%2C essential component of cleavage and polyadenylation factor IA %28CF IA%29%2C involved in pre-mRNA 3%27 end processing and in trans
chr04	0.846633	0.913314	924781	+	ID=NC_001136.8:IVY1:unknown_transcript_1;Parent=NC_001136.8:IVY1;locus_tag=YDR229W;note=Phospholipid-binding protein that interacts with both Ypt7p and Vps33p%2C may partially counteract the action of Vps33p and vice versa%2C localizes to the rim of the v
chr04	0.914929	0.909859	926906	-	ID=NC_001136.8:COX20:unknown_transcript_1;Parent=NC_001136.8:COX20;locus_tag=YDR231C;note=Mitochondrial inner membrane protein%2C required for proteolytic processing of Cox2p and its assembly into cytochrome c oxidase;experiment=experimental evidence%2C n
chr04	0.931455	0.927737	927448	+	ID=NC_001136.8:HEM1:unknown_transcript_1;Parent=NC_001136.8:HEM1;locus_tag=YDR232W;gene_synonym=CYD1;EC_number=2.3.1.37;note=Hem1p;experiment=experimental evidence%2C no additional details recorded;product=5-aminolevulinate synthase%2C catalyzes the first
chr04	0.967024	0.967951	930353	-	ID=NC_001136.8:RTN1:unknown_transcript_1;Parent=NC_001136.8:RTN1;locus_tag=YDR233C;note=Rtn1p;experiment=experimental evidence%2C no additional details recorded;product=ER membrane protein that interacts with exocyst subunit Sec6p and with Yip3p%3B also i
chr04	0.967415	0.980945	931125	+	ID=NC_001136.8:LYS4:unknown_transcript_1;Parent=NC_001136.8:LYS4;locus_tag=YDR234W;gene_synonym=LYS3;EC_number=4.2.1.36;note=Lys4p;experiment=experimental evidence%2C no additional details recorded;product=Homoaconitase%2C catalyzes the conversion of homo
chr04	0.594276	0.856735	933500	+	ID=NC_001136.8:PRP42:unknown_transcript_1;Parent=NC_001136.8:PRP42;locus_tag=YDR235W;gene_synonym=SNU65;gene_synonym=MUD16;note=U1 snRNP protein involved in splicing%2C required for U1 snRNP biogenesis%3B contains multiple tetriatricopeptide repeats;exper
chr04	0.936595	0.974214	935888	-	ID=NC_001136.8:FMN1:unknown_transcript_1;Parent=NC_001136.8:FMN1;locus_tag=YDR236C;note=Riboflavin kinase%2C phosphorylates riboflavin to form riboflavin monophosphate %28FMN%29%2C which is a necessary cofactor for many enzymes%3B localizes to microsomes
chr04	0.94662	0.904913	936611	+	ID=NC_001136.8:MRPL7:unknown_transcript_1;Parent=NC_001136.8:MRPL7;locus_tag=YDR237W;note=Mrpl7p;experiment=experimental evidence%2C no additional details recorded;product=Mitochondrial ribosomal protein of the large subunit;protein_id=NP_010523.1;db_xref
chr04	0.976026	0.973622	940812	-	ID=NC_001136.8:SEC26:unknown_transcript_1;Parent=NC_001136.8:SEC26;locus_tag=YDR238C;note=Sec26p;experiment=experimental evidence%2C no additional details recorded;product=Essential beta-coat protein of the COPI coatomer%2C involved in ER-to-Golgi protein
chr04	0.888623	0.874772	943416	-	locus_tag=YDR239C;note=Ydr239cp;inference=non-experimental evidence%2C no additional details recorded;product=Protein of unknown function that may interact with ribosomes%2C based on co-purification experiments;protein_id=NP_010525.1;db_xref=SGD:S00000264
chr04	0.862104	0.87249	945148	-	ID=NC_001136.8:SNU56:unknown_transcript_1;Parent=NC_001136.8:SNU56;locus_tag=YDR240C;gene_synonym=MUD10;note=Snu56p;experiment=experimental evidence%2C no additional details recorded;product=Component of U1 snRNP required for mRNA splicing via spliceosome
chr04	0.964266	0.94091	946803	+	ID=NC_001136.8:AMD2:unknown_transcript_1;Parent=NC_001136.8:AMD2;locus_tag=YDR242W;EC_number=3.5.1.4;note=Putative amidase;experiment=experimental evidence%2C no additional details recorded;product=Amd2p;protein_id=NP_010528.1;db_xref=SGD:S000002650;db_xr
chr04	0.92727	0.899545	950280	-	ID=NC_001136.8:PRP28:unknown_transcript_1;Parent=NC_001136.8:PRP28;locus_tag=YDR243C;note=RNA helicase in the DEAD-box family%2C involved in RNA isomerization at the 5%27 splice site;experiment=experimental evidence%2C no additional details recorded;produ
chr04	0.970836	0.906917	950559	+	ID=NC_001136.8:PEX5:unknown_transcript_1;Parent=NC_001136.8:PEX5;locus_tag=YDR244W;gene_synonym=PAS10;note=Pex5p;experiment=experimental evidence%2C no additional details recorded;product=Peroxisomal membrane signal receptor for the C-terminal tripeptide
chr04	0.670903	0.955076	952796	+	ID=NC_001136.8:MNN10:unknown_transcript_1;Parent=NC_001136.8:MNN10;locus_tag=YDR245W;gene_synonym=REC41;gene_synonym=SLC2;gene_synonym=BED1;EC_number=2.4.1.-;note=Subunit of a Golgi mannosyltransferase complex also containing Anp1p%2C Mnn9p%2C Mnn11p%2C a
chr04	0.691311	0.846135	954284	+	ID=NC_001136.8:TRS23:unknown_transcript_1;Parent=NC_001136.8:TRS23;locus_tag=YDR246W;note=Trs23p;experiment=experimental evidence%2C no additional details recorded;product=One of 10 subunits of the transport protein particle %28TRAPP%29 complex of the cis
chr04	0.728162	0.852558	955129	+	locus_tag=YDR246W-A;note=Ydr246w-ap;inference=non-experimental evidence%2C no additional details recorded;product=Putative protein of unknown function%3B identified by fungal homology and RT-PCR;protein_id=NP_878065.1;db_xref=SGD:S000028542;db_xref=GI:334
chr04	0.731457	0.829195	956009	+	ID=NC_001136.8:VHS1:unknown_transcript_1;Parent=NC_001136.8:VHS1;locus_tag=YDR247W;note=Vhs1p;experiment=experimental evidence%2C no additional details recorded;product=Cytoplasmic serine%2Fthreonine protein kinase%3B identified as a high-copy suppressor
chr04	0.748991	0.951288	958335	-	locus_tag=YDR248C;note=Ydr248cp;inference=non-experimental evidence%2C no additional details recorded;product=Putative protein of unknown function%3B green fluorescent protein %28GFP%29-fusion protein localizes to the cytoplasm;protein_id=NP_010534.1;db_x
chr04	0.768875	0.966526	959798	-	locus_tag=YDR249C;note=Ydr249cp;inference=non-experimental evidence%2C no additional details recorded;product=Putative protein of unknown function;protein_id=NP_010535.1;db_xref=SGD:S000002657;db_xref=GI:6320455;db_xref=GeneID:851836;exon_number=1
chr04	0.785428	0.915217	960610	+	ID=NC_001136.8:PAM1:unknown_transcript_1;Parent=NC_001136.8:PAM1;locus_tag=YDR251W;note=Pam1p;experiment=experimental evidence%2C no additional details recorded;product=Essential protein of unknown function%3B exhibits variable expression during colony mo
chr04	0.486007	0.760936	963408	+	ID=NC_001136.8:BTT1:unknown_transcript_1;Parent=NC_001136.8:BTT1;locus_tag=YDR252W;note=Btt1p;experiment=experimental evidence%2C no additional details recorded;product=Beta3 subunit of the heterotrimeric nascent polypeptide-associated complex %28alpha%2C
chr04	0.842085	0.924846	964561	-	ID=NC_001136.8:MET32:unknown_transcript_1;Parent=NC_001136.8:MET32;locus_tag=YDR253C;note=Zinc-finger DNA-binding protein%2C involved in transcriptional regulation of the methionine biosynthetic genes%2C similar to Met31p;experiment=experimental evidence%
chr04	0.888616	0.875144	965109	+	ID=NC_001136.8:CHL4:unknown_transcript_1;Parent=NC_001136.8:CHL4;locus_tag=YDR254W;gene_synonym=MCM17;gene_synonym=CTF17;note=Outer kinetochore protein required for chromosome stability%2C interacts with kinetochore proteins Ctf19p%2C Ctf3p%2C and Iml3p%3
chr04	0.939919	0.907757	967818	-	ID=NC_001136.8:RMD5:unknown_transcript_1;Parent=NC_001136.8:RMD5;locus_tag=YDR255C;gene_synonym=GID2;note=Rmd5p;experiment=experimental evidence%2C no additional details recorded;product=Cytosolic protein required for sporulation%3B also required for the
chr04	0.601657	0.73327	969676	-	ID=NC_001136.8:CTA1:unknown_transcript_1;Parent=NC_001136.8:CTA1;locus_tag=YDR256C;EC_number=1.11.1.6;note=Cta1p;experiment=experimental evidence%2C no additional details recorded;product=Catalase A%2C breaks down hydrogen peroxide in the peroxisomal matr
chr04	0.564924	0.654746	971470	-	ID=NC_001136.8:SET7:unknown_transcript_1;Parent=NC_001136.8:SET7;locus_tag=YDR257C;gene_synonym=RMS1;note=Set7p;experiment=experimental evidence%2C no additional details recorded;product=Nuclear protein that contains a SET-domain%2C which have been shown
chr04	0.486806	0.560648	974239	-	ID=NC_001136.8:HSP78:unknown_transcript_1;Parent=NC_001136.8:HSP78;locus_tag=YDR258C;note=Oligomeric mitochondrial matrix chaperone that cooperates with Ssc1p in mitochondrial thermotolerance after heat shock%3B prevents the aggregation of misfolded matri
chr04	0.516213	0.834686	975778	-	ID=NC_001136.8:YAP6:unknown_transcript_1;Parent=NC_001136.8:YAP6;locus_tag=YDR259C;gene_synonym=HAL7;note=Yap6p;experiment=experimental evidence%2C no additional details recorded;product=Putative basic leucine zipper %28bZIP%29 transcription factor%3B ove
chr04	0.743175	0.933667	977225	-	ID=NC_001136.8:SWM1:unknown_transcript_1;Parent=NC_001136.8:SWM1;locus_tag=YDR260C;note=Swm1p;experiment=experimental evidence%2C no additional details recorded;product=Subunit of the anaphase-promoting complex%2C which is an E3 ubiquitin ligase that regu
chr04	0.934701	0.956595	979205	-	ID=NC_001136.8:EXG2:unknown_transcript_1;Parent=NC_001136.8:EXG2;locus_tag=YDR261C;EC_number=3.2.1.58;note=Exo-1%2C3-beta-glucanase%2C involved in cell wall beta-glucan assembly%3B may be anchored to the plasma membrane via a glycosylphosphatidylinositol
chr04	0.788685	0.970849	981458	+	locus_tag=YDR261W-B;note=Ydr261w-bp;inference=non-experimental evidence%2C no additional details recorded;product=Retrotransposon TYA Gag and TYB Pol genes%3B transcribed%2Ftranslated as one unit%3B polyprotein is processed to make a nucleocapsid-like pro
chr04	0.788685	0.970849	981458	+	locus_tag=YDR261W-A;note=Ydr261w-ap;inference=non-experimental evidence%2C no additional details recorded;product=Retrotransposon TYA Gag gene co-transcribed with TYB Pol%3B translated as TYA or TYA-TYB polyprotein%3B Gag is a nucleocapsid protein that is
chr04	0.984849	0.993723	992345	-	locus_tag=YDR261C-D;note=Ydr261c-dp;inference=non-experimental evidence%2C no additional details recorded;product=Retrotransposon TYA Gag and TYB Pol genes%3B in YDRCTY1-3 TYB is mutant and probably non-functional;protein_id=NP_058148.1;db_xref=SGD:S00000
chr04	0.984849	0.993723	992345	-	locus_tag=YDR261C-C;note=Ydr261c-cp;inference=non-experimental evidence%2C no additional details recorded;product=Retrotransposon TYA Gag gene co-transcribed with TYB Pol%3B in YDRCTY1-3 TYB is mutant and probably non-functional;protein_id=NP_058149.1;db_
chr04	0.990989	0.995916	993130	+	locus_tag=YDR262W;note=Ydr262wp;inference=non-experimental evidence%2C no additional details recorded;product=Putative protein of unknown function%3B green fluorescent protein %28GFP%29-fusion protein localizes to the vacuole and is induced in response to
chr04	0.697281	0.554453	995530	-	ID=NC_001136.8:DIN7:unknown_transcript_1;Parent=NC_001136.8:DIN7;locus_tag=YDR263C;gene_synonym=DIN3;note=Mitochondrial nuclease functioning in DNA repair and replication%2C modulates the stability of the mitochondrial genome%2C induced by exposure to mut
chr04	0.947925	0.958525	998319	-	ID=NC_001136.8:AKR1:unknown_transcript_1;Parent=NC_001136.8:AKR1;locus_tag=YDR264C;note=Palmitoyl transferase involved in protein palmitoylation%3B acts as a negative regulator of pheromone response pathway%3B required for endocytosis of pheromone recepto
chr04	0.938652	0.939827	998860	+	ID=NC_001136.8:PEX10:unknown_transcript_1;Parent=NC_001136.8:PEX10;locus_tag=YDR265W;gene_synonym=PAS4;note=Pex10p;experiment=experimental evidence%2C no additional details recorded;product=C3HC4-type RING-finger peroxisomal membrane peroxin required for
chr04	0.600215	0.91276	1002019	-	locus_tag=YDR266C;note=Ydr266cp;inference=non-experimental evidence%2C no additional details recorded;product=Protein of unknown function that may interact with ribosomes%2C based on co-purification experiments%3Bgreen fluorescent protein %28GFP%29-fusion
chr04	0.838537	0.948965	1003498	-	ID=NC_001136.8:CIA1:unknown_transcript_1;Parent=NC_001136.8:CIA1;locus_tag=YDR267C;note=Essential protein involved in assembly of cytosolic and nuclear iron-sulfur proteins;experiment=experimental evidence%2C no additional details recorded;product=Cia1p;p
chr04	0.872999	0.828567	1004000	+	ID=NC_001136.8:MSW1:unknown_transcript_1;Parent=NC_001136.8:MSW1;locus_tag=YDR268W;EC_number=6.1.1.2;note=Msw1p;experiment=experimental evidence%2C no additional details recorded;product=Mitochondrial tryptophanyl-tRNA synthetase;protein_id=NP_010554.1;db
chr04	0.95114	0.962635	1005671	+	ID=NC_001136.8:CCC2:unknown_transcript_1;Parent=NC_001136.8:CCC2;locus_tag=YDR270W;EC_number=3.6.3.4;note=Cu%28%2B2%29-transporting P-type ATPase%2C required for export of copper from the cytosol into an extracytosolic compartment%3B has similarity to hum
chr04	0.659899	0.759619	1009006	+	ID=NC_001136.8:GLO2:unknown_transcript_1;Parent=NC_001136.8:GLO2;locus_tag=YDR272W;note=Glo2p;experiment=experimental evidence%2C no additional details recorded;product=Cytoplasmic glyoxalase II%2C catalyzes the hydrolysis of S-D-lactoylglutathione into g
chr04	0.711747	0.679768	1010172	+	ID=NC_001136.8:DON1:unknown_transcript_1;Parent=NC_001136.8:DON1;locus_tag=YDR273W;note=Meiosis-specific component of the spindle pole body%2C part of the leading edge protein %28LEP%29 coat%2C forms a ring-like structure at the leading edge of the prospo
chr04	0.626707	0.906477	1012248	+	ID=NC_001136.8:BSC2:unknown_transcript_1;Parent=NC_001136.8:BSC2;locus_tag=YDR275W;note=Protein of unknown function%2C ORF exhibits genomic organization compatible with a translational readthrough-dependent mode of expression;experiment=experimental evide
chr04	0.885671	0.934585	1013639	-	ID=NC_001136.8:PMP3:unknown_transcript_1;Parent=NC_001136.8:PMP3;locus_tag=YDR276C;gene_synonym=SNA1;note=Small plasma membrane protein related to a family of plant polypeptides that are overexpressed under high salt concentration or low temperature%2C no
chr04	0.882439	0.838329	1015698	-	ID=NC_001136.8:MTH1:unknown_transcript_1;Parent=NC_001136.8:MTH1;locus_tag=YDR277C;gene_synonym=HTR1;gene_synonym=DGT1;gene_synonym=BPC1;note=Negative regulator of the glucose-sensing signal transduction pathway%2C required for repression of transcription
chr04	0.856634	0.931754	1019364	+	ID=NC_001136.8:RNH202:unknown_transcript_1;Parent=NC_001136.8:RNH202;locus_tag=YDR279W;note=Rnh202p;experiment=experimental evidence%2C no additional details recorded;product=Ribonuclease H2 subunit%2C required for RNase H2 activity;protein_id=NP_010565.1
chr04	0.327192	0.727045	1020743	+	ID=NC_001136.8:RRP45:unknown_transcript_1;Parent=NC_001136.8:RRP45;locus_tag=YDR280W;note=Rrp45p;experiment=experimental evidence%2C no additional details recorded;product=Protein involved in rRNA processing%3B component of the exosome 3-%3E5 exonuclease
chr04	0.984619	0.959393	1022317	-	ID=NC_001136.8:PHM6:unknown_transcript_1;Parent=NC_001136.8:PHM6;locus_tag=YDR281C;note=Protein of unknown function%2C expression is regulated by phosphate levels;experiment=experimental evidence%2C no additional details recorded;product=Phm6p;protein_id=
chr04	0.864195	0.958146	1024751	-	locus_tag=YDR282C;note=Ydr282cp;inference=non-experimental evidence%2C no additional details recorded;product=Putative protein of unknown function;protein_id=NP_010568.1;db_xref=SGD:S000002690;db_xref=GI:6320488;db_xref=GeneID:851876;exon_number=1
chr04	0.835102	0.924387	1030045	-	ID=NC_001136.8:GCN2:unknown_transcript_1;Parent=NC_001136.8:GCN2;locus_tag=YDR283C;gene_synonym=AAS1;EC_number=2.7.1.-;note=Protein kinase%2C phosphorylates the alpha-subunit of translation initiation factor eIF2 %28Sui2p%29 in response to starvation%3B a
chr04	0.897335	0.961074	1031415	-	ID=NC_001136.8:DPP1:unknown_transcript_1;Parent=NC_001136.8:DPP1;locus_tag=YDR284C;gene_synonym=ZRG1;note=Dpp1p;experiment=experimental evidence%2C no additional details recorded;product=Diacylglycerol pyrophosphate %28DGPP%29 phosphatase%2C zinc-regulate
chr04	0.891247	0.954901	1032432	+	ID=NC_001136.8:ZIP1:unknown_transcript_1;Parent=NC_001136.8:ZIP1;locus_tag=YDR285W;note=Zip1p;experiment=experimental evidence%2C no additional details recorded;product=Transverse filament protein of the synaptonemal complex%3B required for normal levels
chr04	0.927432	0.930078	1035571	-	locus_tag=YDR286C;note=Ydr286cp;inference=non-experimental evidence%2C no additional details recorded;product=Putative protein of unknown function%3B predicted to have thiol-disulfide oxidoreductase active site;protein_id=NP_010572.1;db_xref=SGD:S00000269
chr04	0.916414	0.970089	1035991	+	ID=NC_001136.8:INM2:unknown_transcript_1;Parent=NC_001136.8:INM2;locus_tag=YDR287W;note=Inositol monophosphatase%2C involved in biosynthesis of inositol%3B enzymatic activity requires magnesium ions and is inhibited by lithium and sodium ions%3B inm1 inm2
chr04	0.883702	0.958515	1037191	+	ID=NC_001136.8:NSE3:unknown_transcript_1;Parent=NC_001136.8:NSE3;locus_tag=YDR288W;note=Nse3p;experiment=experimental evidence%2C no additional details recorded;product=Essential subunit of the Mms21-Smc5-Smc6 complex%3B protein of unknown function%3B req
chr04	0.632073	0.926861	1039505	-	ID=NC_001136.8:RTT103:unknown_transcript_1;Parent=NC_001136.8:RTT103;locus_tag=YDR289C;note=Rtt103p;experiment=experimental evidence%2C no additional details recorded;product=Protein that interacts with exonuclease Rat1p and Rai1p and plays a role in tran
chr04	0.59737	0.813434	1039724	+	ID=NC_001136.8:HRQ1:unknown_transcript_1;Parent=NC_001136.8:HRQ1;locus_tag=YDR291W;note=Putative DNA helicase;experiment=experimental evidence%2C no additional details recorded;product=Hrq1p;protein_id=NP_010577.1;db_xref=SGD:S000002699;db_xref=GI:6320497
chr04	0.751391	0.842901	1045007	-	ID=NC_001136.8:SRP101:unknown_transcript_1;Parent=NC_001136.8:SRP101;locus_tag=YDR292C;note=Srp101p;experiment=experimental evidence%2C no additional details recorded;product=Signal recognition particle %28SRP%29 receptor - alpha subunit%3B contain GTPase
chr04	0.208822	0.521246	1049388	-	ID=NC_001136.8:SSD1:unknown_transcript_1;Parent=NC_001136.8:SSD1;locus_tag=YDR293C;gene_synonym=SRK1;gene_synonym=RLT1;gene_synonym=MCS1;gene_synonym=CLA1;note=Ssd1p;experiment=experimental evidence%2C no additional details recorded;product=Protein with a
chr04	0.950243	0.939234	1052224	-	ID=NC_001136.8:DPL1:unknown_transcript_1;Parent=NC_001136.8:DPL1;locus_tag=YDR294C;gene_synonym=BST1;note=Dpl1p;experiment=experimental evidence%2C no additional details recorded;product=Dihydrosphingosine phosphate lyase%2C regulates intracellular levels
chr04	0.512372	0.891605	1054643	-	ID=NC_001136.8:HDA2:unknown_transcript_1;Parent=NC_001136.8:HDA2;locus_tag=YDR295C;gene_synonym=PLO2;note=Subunit of a possibly tetrameric trichostatin A-sensitive class II histone deacetylase complex containing an Hda1p homodimer and an Hda2p-Hda3p heter
chr04	0.905283	0.926806	1055208	+	ID=NC_001136.8:MHR1:unknown_transcript_1;Parent=NC_001136.8:MHR1;locus_tag=YDR296W;gene_synonym=XTC1;note=Protein involved in homologous recombination in mitochondria and in transcription regulation in nucleus%3B binds to activation domains of acidic acti
chr04	0.852967	0.882575	1056547	+	ID=NC_001136.8:SUR2:unknown_transcript_1;Parent=NC_001136.8:SUR2;locus_tag=YDR297W;gene_synonym=SYR2;note=Sur2p;experiment=experimental evidence%2C no additional details recorded;product=Sphinganine C4-hydroxylase%2C catalyses the conversion of sphinganin
chr04	0.948053	0.959825	1058810	-	ID=NC_001136.8:ATP5:unknown_transcript_1;Parent=NC_001136.8:ATP5;locus_tag=YDR298C;gene_synonym=OSC1;EC_number=3.6.3.14;note=Subunit 5 of the stator stalk of mitochondrial F1F0 ATP synthase%2C which is an evolutionarily conserved enzyme complex required f
chr04	0.94982	0.949562	1059623	+	ID=NC_001136.8:BFR2:unknown_transcript_1;Parent=NC_001136.8:BFR2;locus_tag=YDR299W;note=Essential protein possibly involved in secretion%3B multicopy suppressor of sensitivity to Brefeldin A;experiment=experimental evidence%2C no additional details record
chr04	0.97585	0.971678	1062787	-	ID=NC_001136.8:PRO1:unknown_transcript_1;Parent=NC_001136.8:PRO1;locus_tag=YDR300C;EC_number=2.7.2.11;note=Pro1p;experiment=experimental evidence%2C no additional details recorded;product=Gamma-glutamyl kinase%2C catalyzes the first step in proline biosyn
chr04	0.952923	0.977515	1063348	+	ID=NC_001136.8:CFT1:unknown_transcript_1;Parent=NC_001136.8:CFT1;locus_tag=YDR301W;gene_synonym=YHH1;note=RNA-binding subunit of the mRNA cleavage and polyadenylation factor%3B involved in poly%28A%29 site recognition and required for both pre-mRNA cleava
chr04	0.788659	0.894093	1067727	+	ID=NC_001136.8:GPI11:unknown_transcript_1;Parent=NC_001136.8:GPI11;locus_tag=YDR302W;note=Gpi11p;experiment=experimental evidence%2C no additional details recorded;product=ER membrane protein involved in a late step of glycosylphosphatidylinositol %28GPI%
chr04	0.898128	0.952046	1071382	-	ID=NC_001136.8:RSC3:unknown_transcript_1;Parent=NC_001136.8:RSC3;locus_tag=YDR303C;note=Rsc3p;experiment=experimental evidence%2C no additional details recorded;product=Component of the RSC chromatin remodeling complex%3B essential gene required for maint
chr04	0.855058	0.869115	1072553	-	ID=NC_001136.8:CPR5:unknown_transcript_1;Parent=NC_001136.8:CPR5;locus_tag=YDR304C;gene_synonym=CYP5;EC_number=5.2.1.8;note=Peptidyl-prolyl cis-trans isomerase %28cyclophilin%29 of the endoplasmic reticulum%2C catalyzes the cis-trans isomerization of pept
chr04	0.663201	0.781625	1073484	-	ID=NC_001136.8:HNT2:unknown_transcript_1;Parent=NC_001136.8:HNT2;locus_tag=YDR305C;gene_synonym=APH1;note=Hnt2p;experiment=experimental evidence%2C no additional details recorded;product=Dinucleoside triphosphate hydrolase%3B has similarity to the tumor s
chr04	0.799575	0.923575	1075167	-	locus_tag=YDR306C;note=Ydr306cp;inference=non-experimental evidence%2C no additional details recorded;product=F-box protein of unknown function%3B interacts with Sgt1p via a Leucine-Rich Repeat %28LRR%29 domain;protein_id=NP_010592.1;db_xref=SGD:S00000271
chr04	0.951919	0.970034	1075861	+	locus_tag=YDR307W;note=Ydr307wp;inference=non-experimental evidence%2C no additional details recorded;product=Putative protein of unknown function;protein_id=NP_010593.1;db_xref=SGD:S000002715;db_xref=GI:6320513;db_xref=GeneID:851902;exon_number=1
chr04	0.857802	0.980836	1078445	-	ID=NC_001136.8:SRB7:unknown_transcript_1;Parent=NC_001136.8:SRB7;locus_tag=YDR308C;gene_synonym=MED21;note=Subunit of the RNA polymerase II mediator complex%3B associates with core polymerase subunits to form the RNA polymerase II holoenzyme%3B essential
chr04	0.630709	0.828454	1080195	-	ID=NC_001136.8:GIC2:unknown_transcript_1;Parent=NC_001136.8:GIC2;locus_tag=YDR309C;note=Protein of unknown function involved in initiation of budding and cellular polarization%2C interacts with Cdc42p via the Cdc42%2FRac-interactive binding %28CRIB%29 dom
chr04	0.951724	0.969273	1084312	-	ID=NC_001136.8:SUM1:unknown_transcript_1;Parent=NC_001136.8:SUM1;locus_tag=YDR310C;note=Transcriptional repressor required for mitotic repression of middle sporulation-specific genes%3B involved in telomere maintenance%2C regulated by the pachytene checkp
chr04	0.953685	0.980596	1085062	+	ID=NC_001136.8:TFB1:unknown_transcript_1;Parent=NC_001136.8:TFB1;locus_tag=YDR311W;note=Tfb1p;experiment=experimental evidence%2C no additional details recorded;product=Subunit of TFIIH and nucleotide excision repair factor 3 complexes%2C required for nuc
chr04	0.776071	0.944292	1087578	+	ID=NC_001136.8:SSF2:unknown_transcript_1;Parent=NC_001136.8:SSF2;locus_tag=YDR312W;note=Ssf2p;experiment=experimental evidence%2C no additional details recorded;product=Protein required for ribosomal large subunit maturation%2C functionally redundant with
chr04	0.525671	0.787085	1090076	-	ID=NC_001136.8:PIB1:unknown_transcript_1;Parent=NC_001136.8:PIB1;locus_tag=YDR313C;note=RING-type ubiquitin ligase of the endosomal and vacuolar membranes%2C binds phosphatidylinositol%283%29-phosphate%3B contains a FYVE finger domain;experiment=experimen
chr04	0.717239	0.898309	1092508	-	ID=NC_001136.8:RAD34:unknown_transcript_1;Parent=NC_001136.8:RAD34;locus_tag=YDR314C;note=Rad34p;experiment=experimental evidence%2C no additional details recorded;product=Protein involved in nucleotide excision repair %28NER%29%3B homologous to RAD4;prot
chr04	0.443025	0.850006	1093583	-	ID=NC_001136.8:IPK1:unknown_transcript_1;Parent=NC_001136.8:IPK1;locus_tag=YDR315C;gene_synonym=GSL1;note=Ipk1p;experiment=experimental evidence%2C no additional details recorded;product=Inositol 1%2C3%2C4%2C5%2C6-pentakisphosphate 2-kinase%2C nuclear pro
chr04	0.893205	0.931914	1093760	+	ID=NC_001136.8:OMS1:unknown_transcript_1;Parent=NC_001136.8:OMS1;locus_tag=YDR316W;note=Protein integral to the mitochondrial membrane%3B has a conserved methyltransferase motif%3B multicopy suppressor of respiratory defects caused by OXA1 mutations;exper
chr04	0.908567	0.878488	1096061	+	locus_tag=YDR316W-A;note=Ydr316w-ap;inference=non-experimental evidence%2C no additional details recorded;product=Retrotransposon TYA Gag gene co-transcribed with TYB Pol%3B translated as TYA or TYA-TYB polyprotein%3B Gag is a nucleocapsid protein that is
chr04	0.908567	0.878488	1096061	+	locus_tag=YDR316W-B;note=Ydr316w-bp;inference=non-experimental evidence%2C no additional details recorded;product=Retrotransposon TYA Gag and TYB Pol genes%3B transcribed%2Ftranslated as one unit%3B polyprotein is processed to make a nucleocapsid-like pro
chr04	0.989692	0.991598	1102181	+	ID=NC_001136.8:HIM1:unknown_transcript_1;Parent=NC_001136.8:HIM1;locus_tag=YDR317W;note=Protein of unknown function involved in DNA repair;experiment=experimental evidence%2C no additional details recorded;product=Him1p;protein_id=NP_010603.1;db_xref=SGD:
chr04	0.513859	0.958255	1103755	+	ID=NC_001136.8:MCM21:unknown_transcript_1;Parent=NC_001136.8:MCM21;locus_tag=YDR318W;gene_synonym=CTF5;note=Protein involved in minichromosome maintenance%3B component of the COMA complex %28Ctf19p%2C Okp1p%2C Mcm21p%2C Ame1p%29 that bridges kinetochore s
chr04	0.884511	0.976758	1105824	-	ID=NC_001136.8:YFT2:unknown_transcript_1;Parent=NC_001136.8:YFT2;locus_tag=YDR319C;gene_synonym=FIT2A;note=Yft2p;experiment=experimental evidence%2C no additional details recorded;product=Putative protein of unknown function%2C identified as an ortholog o
chr04	0.909384	0.947539	1108098	-	ID=NC_001136.8:SWA2:unknown_transcript_1;Parent=NC_001136.8:SWA2;locus_tag=YDR320C;gene_synonym=BUD24;gene_synonym=AUX1;note=Swa2p;experiment=experimental evidence%2C no additional details recorded;product=Auxilin-like protein involved in vesicular transp
chr04	0.898133	0.947689	1108495	-	ID=NC_001136.8:DAD4:unknown_transcript_1;Parent=NC_001136.8:DAD4;locus_tag=YDR320C-A;gene_synonym=HSK2;note=Essential subunit of the Dam1 complex %28aka DASH complex%29%2C couples kinetochores to the force produced by MT depolymerization thereby aiding in
chr04	0.613296	0.899819	1108699	+	ID=NC_001136.8:ASP1:unknown_transcript_1;Parent=NC_001136.8:ASP1;locus_tag=YDR321W;EC_number=3.5.1.1;note=Cytosolic L-asparaginase%2C involved in asparagine catabolism;experiment=experimental evidence%2C no additional details recorded;product=Asp1p;protei
chr04	0.954843	0.972043	1110586	+	ID=NC_001136.8:MRPL35:unknown_transcript_1;Parent=NC_001136.8:MRPL35;locus_tag=YDR322W;note=Mrpl35p;experiment=experimental evidence%2C no additional details recorded;product=Mitochondrial ribosomal protein of the large subunit;protein_id=NP_010608.1;db_x
chr04	0.827866	0.909035	1112290	-	ID=NC_001136.8:TIM11:unknown_transcript_1;Parent=NC_001136.8:TIM11;locus_tag=YDR322C-A;gene_synonym=ATP21;note=Tim11p;experiment=experimental evidence%2C no additional details recorded;product=Subunit e of mitochondrial F1F0-ATPase%2C which is a large%2C
chr04	0.934038	0.911505	1114024	-	ID=NC_001136.8:PEP7:unknown_transcript_1;Parent=NC_001136.8:PEP7;locus_tag=YDR323C;gene_synonym=VPT19;gene_synonym=VPS19;gene_synonym=VPL21;gene_synonym=VAC1;note=Pep7p;experiment=experimental evidence%2C no additional details recorded;product=Multivalent
chr04	0.74945	0.950203	1116760	-	ID=NC_001136.8:UTP4:unknown_transcript_1;Parent=NC_001136.8:UTP4;locus_tag=YDR324C;note=Utp4p;experiment=experimental evidence%2C no additional details recorded;product=Nucleolar protein%2C component of the small subunit %28SSU%29 processome containing th
chr04	0.593684	0.934978	1117121	+	ID=NC_001136.8:YCG1:unknown_transcript_1;Parent=NC_001136.8:YCG1;locus_tag=YDR325W;gene_synonym=YCS5;gene_synonym=TIE1;note=Ycg1p;experiment=experimental evidence%2C no additional details recorded;product=Non-SMC subunit of the condensin complex %28Smc2p-
chr04	0.74763	0.909232	1124920	-	ID=NC_001136.8:YSP2:unknown_transcript_1;Parent=NC_001136.8:YSP2;locus_tag=YDR326C;note=Ysp2p;experiment=experimental evidence%2C no additional details recorded;product=Protein involved in programmed cell death%3B mutant shows resistance to cell death ind
chr04	0.957422	0.983958	1126013	-	ID=NC_001136.8:SKP1:unknown_transcript_1;Parent=NC_001136.8:SKP1;locus_tag=YDR328C;gene_synonym=MGO1;note=Skp1p;experiment=experimental evidence%2C no additional details recorded;product=Evolutionarily conserved kinetochore protein that is part of multipl
chr04	0.760958	0.952507	1127590	-	ID=NC_001136.8:PEX3:unknown_transcript_1;Parent=NC_001136.8:PEX3;locus_tag=YDR329C;gene_synonym=PAS3;note=Pex3p;experiment=experimental evidence%2C no additional details recorded;product=Peroxisomal membrane protein %28PMP%29 required required for the pro
chr04	0.900179	0.890399	1127867	+	ID=NC_001136.8:UBX5:unknown_transcript_1;Parent=NC_001136.8:UBX5;locus_tag=YDR330W;note=Ubx5p;experiment=experimental evidence%2C no additional details recorded;product=UBX %28ubiquitin regulatory X%29 domain-containing protein that interacts with Cdc48p;
chr04	0.883025	0.907826	1129583	+	ID=NC_001136.8:GPI8:unknown_transcript_1;Parent=NC_001136.8:GPI8;locus_tag=YDR331W;EC_number=3.-.-.-;note=Gpi8p;experiment=experimental evidence%2C no additional details recorded;product=ER membrane glycoprotein subunit of the glycosylphosphatidylinositol
chr04	0.864955	0.949348	1130996	+	ID=NC_001136.8:IRC3:unknown_transcript_1;Parent=NC_001136.8:IRC3;locus_tag=YDR332W;note=hypothetical protein%3B null mutant displays increased levels of spontaneous Rad52 foci;experiment=experimental evidence%2C no additional details recorded;product=Irc3
chr04	0.845362	0.892022	1135426	-	locus_tag=YDR333C;note=Ydr333cp;inference=non-experimental evidence%2C no additional details recorded;product=Putative protein of unknown function;protein_id=NP_010620.1;db_xref=SGD:S000002741;db_xref=GI:6320540;db_xref=GeneID:851933;exon_number=1
chr04	0.95303	0.963156	1135927	+	ID=NC_001136.8:SWR1:unknown_transcript_1;Parent=NC_001136.8:SWR1;locus_tag=YDR334W;note=Swr1p;experiment=experimental evidence%2C no additional details recorded;product=Swi2%2FSnf2-related ATPase that is the structural component of the SWR1 complex%2C whi
chr04	0.821898	0.940133	1141162	+	ID=NC_001136.8:MSN5:unknown_transcript_1;Parent=NC_001136.8:MSN5;locus_tag=YDR335W;gene_synonym=STE21;gene_synonym=KAP142;note=Msn5p;experiment=experimental evidence%2C no additional details recorded;product=Karyopherin involved in nuclear import and expo
chr04	0.77913	0.88015	1145086	+	locus_tag=YDR336W;note=Ydr336wp;inference=non-experimental evidence%2C no additional details recorded;product=Putative protein of unknown function%3B sumoylated under stress conditions in a genome wide study%3B YDR336W is not an essential gene;protein_id=
chr04	0.707994	0.898987	1146313	+	ID=NC_001136.8:MRPS28:unknown_transcript_1;Parent=NC_001136.8:MRPS28;locus_tag=YDR337W;note=Mrps28p;experiment=experimental evidence%2C no additional details recorded;product=Mitochondrial ribosomal protein of the small subunit;protein_id=NP_010624.1;db_x
chr04	0.500536	0.785311	1149460	-	locus_tag=YDR338C;inference=non-experimental evidence%2C no additional details recorded;product=Ydr338cp;protein_id=NP_010625.1;db_xref=SGD:S000002746;db_xref=GI:6320545;db_xref=GeneID:851938;exon_number=1
chr04	0.874563	0.963531	1150514	-	ID=NC_001136.8:FCF1:unknown_transcript_1;Parent=NC_001136.8:FCF1;locus_tag=YDR339C;gene_synonym=UTP24;note=Fcf1p;experiment=experimental evidence%2C no additional details recorded;product=Essential nucleolar protein that is a component of the SSU %28small
chr04	0.770513	0.944512	1153620	-	locus_tag=YDR341C;gene_synonym=RRS1;note=Ydr341cp;inference=non-experimental evidence%2C no additional details recorded;product=Arginyl-tRNA synthetase%2C proposed to be cytoplasmic but the authentic%2C non-tagged protein is detected in highly purified mi
chr04	0.815697	0.856579	1155922	-	ID=NC_001136.8:HXT7:unknown_transcript_1;Parent=NC_001136.8:HXT7;locus_tag=YDR342C;note=Hxt7p;experiment=experimental evidence%2C no additional details recorded;product=High-affinity glucose transporter of the major facilitator superfamily%2C nearly ident
chr04	0.872649	0.925733	1161314	-	ID=NC_001136.8:HXT6:unknown_transcript_1;Parent=NC_001136.8:HXT6;locus_tag=YDR343C;note=Hxt6p;experiment=experimental evidence%2C no additional details recorded;product=High-affinity glucose transporter of the major facilitator superfamily%2C nearly ident
chr04	0.451279	0.624023	1164654	-	ID=NC_001136.8:HXT3:unknown_transcript_1;Parent=NC_001136.8:HXT3;locus_tag=YDR345C;note=Low affinity glucose transporter of the major facilitator superfamily%2C expression is induced in low or high glucose conditions;experiment=experimental evidence%2C no
chr04	0.802599	0.917901	1168653	-	ID=NC_001136.8:SVF1:unknown_transcript_1;Parent=NC_001136.8:SVF1;locus_tag=YDR346C;gene_synonym=SGI1;note=Svf1p;experiment=experimental evidence%2C no additional details recorded;product=Protein with a potential role in cell survival pathways%2C required
chr04	0.759518	0.67204	1169172	+	ID=NC_001136.8:MRP1:unknown_transcript_1;Parent=NC_001136.8:MRP1;locus_tag=YDR347W;note=Mrp1p;experiment=experimental evidence%2C no additional details recorded;product=Mitochondrial ribosomal protein of the small subunit%3B MRP1 exhibits genetic interact
chr04	0.861209	0.969708	1171819	-	locus_tag=YDR348C;note=Ydr348cp;inference=non-experimental evidence%2C no additional details recorded;product=Protein of unknown function%3B green fluorescent protein %28GFP%29-fusion protein localizes to the cell periphery and bud neck%3B potential Cdc28
chr04	0.76756	0.900856	1174170	-	ID=NC_001136.8:YPS7:unknown_transcript_1;Parent=NC_001136.8:YPS7;locus_tag=YDR349C;note=Yps7p;experiment=experimental evidence%2C no additional details recorded;product=Putative GPI-anchored aspartic protease%2C located in the cytoplasm and endoplasmic re
chr04	0.841303	0.980066	1178167	-	ID=NC_001136.8:ATP22:unknown_transcript_1;Parent=NC_001136.8:ATP22;locus_tag=YDR350C;gene_synonym=TCM10;note=Mitochondrial inner membrane protein required for assembly of the F0 sector of mitochondrial F1F0 ATP synthase%2C which is a large%2C evolutionari
chr04	0.85334	0.925675	1178659	+	ID=NC_001136.8:SBE2:unknown_transcript_1;Parent=NC_001136.8:SBE2;locus_tag=YDR351W;note=Sbe2p;experiment=experimental evidence%2C no additional details recorded;product=Protein involved in the transport of cell wall components from the Golgi to the cell s
chr04	0.762598	0.895394	1181794	+	locus_tag=YDR352W;note=Ydr352wp;inference=non-experimental evidence%2C no additional details recorded;product=Putative protein of unknown function;protein_id=NP_010639.1;db_xref=SGD:S000002760;db_xref=GI:6320559;db_xref=GeneID:851954;exon_number=1
chr04	0.897613	0.969151	1183292	+	ID=NC_001136.8:TRR1:unknown_transcript_1;Parent=NC_001136.8:TRR1;locus_tag=YDR353W;note=Trr1p;experiment=experimental evidence%2C no additional details recorded;product=Cytoplasmic thioredoxin reductase%2C key regulatory enzyme that determines the redox s
chr04	0.958502	0.89546	1184740	+	ID=NC_001136.8:TRP4:unknown_transcript_1;Parent=NC_001136.8:TRP4;locus_tag=YDR354W;EC_number=2.4.2.18;note=Trp4p;experiment=experimental evidence%2C no additional details recorded;product=Anthranilate phosphoribosyl transferase of the tryptophan biosynthe
chr04	0.863961	0.893492	1186100	+	ID=NC_001136.8:SPC110:unknown_transcript_1;Parent=NC_001136.8:SPC110;locus_tag=YDR356W;gene_synonym=NUF1;gene_synonym=XCM1;note=Spc110p;experiment=experimental evidence%2C no additional details recorded;product=Inner plaque spindle pole body %28SPB%29 com
chr04	0.825066	0.915391	1189560	-	locus_tag=YDR357C;note=Ydr357cp;inference=non-experimental evidence%2C no additional details recorded;product=Protein of unknown function%3B green fluorescent protein %28GFP%29-fusion protein localizes to the cytoplasm in a punctate pattern;protein_id=NP_
chr04	0.936527	0.936321	1190052	+	ID=NC_001136.8:GGA1:unknown_transcript_1;Parent=NC_001136.8:GGA1;locus_tag=YDR358W;note=Golgi-localized protein with homology to gamma-adaptin%2C interacts with and regulates Arf1p and Arf2p in a GTP-dependent manner in order to facilitate traffic through
chr04	0.977489	0.969606	1194877	-	ID=NC_001136.8:EAF1:unknown_transcript_1;Parent=NC_001136.8:EAF1;locus_tag=YDR359C;gene_synonym=VID21;note=Eaf1p;experiment=experimental evidence%2C no additional details recorded;product=Component of the NuA4 histone acetyltransferase complex;protein_id=
chr04	0.595534	0.920665	1196255	-	ID=NC_001136.8:BCP1:unknown_transcript_1;Parent=NC_001136.8:BCP1;locus_tag=YDR361C;note=Essential protein involved in nuclear export of Mss4p%2C which is a lipid kinase that generates phosphatidylinositol 4%2C5-biphosphate and plays a role in actin cytosk
chr04	0.637321	0.837403	1198689	-	ID=NC_001136.8:TFC6:unknown_transcript_1;Parent=NC_001136.8:TFC6;locus_tag=YDR362C;note=Tfc6p;experiment=experimental evidence%2C no additional details recorded;product=One of six subunits of RNA polymerase III transcription initiation factor complex %28T
chr04	0.643238	0.736227	1199175	+	ID=NC_001136.8:ESC2:unknown_transcript_1;Parent=NC_001136.8:ESC2;locus_tag=YDR363W;note=Protein involved in mating-type locus silencing%2C interacts with Sir2p%3B probably functions to recruit or stabilize Sir proteins;experiment=experimental evidence%2C
chr04	0.78559	0.977364	1202120	+	ID=NC_001136.8:SEM1:unknown_transcript_1;Parent=NC_001136.8:SEM1;locus_tag=YDR363W-A;gene_synonym=HOD1;gene_synonym=DSS1;note=Sem1p;experiment=experimental evidence%2C no additional details recorded;product=Component of the lid subcomplex of the regulator
chr04	0.632496	0.874618	1204202	-	ID=NC_001136.8:CDC40:unknown_transcript_1;Parent=NC_001136.8:CDC40;locus_tag=YDR364C;gene_synonym=SLU4;gene_synonym=SLT15;gene_synonym=PRP17;note=Pre-mRNA splicing factor%2C important for catalytic step II of pre-mRNA splicing and plays a role in cell cyc
chr04	0.985074	0.998927	1206375	-	ID=NC_001136.8:ESF1:unknown_transcript_1;Parent=NC_001136.8:ESF1;locus_tag=YDR365C;note=Nucleolar protein involved in pre-rRNA processing%3B depletion causes severely decreased 18S rRNA levels;experiment=experimental evidence%2C no additional details reco
chr04	0.904249	0.982978	1206989	+	locus_tag=YDR365W-B;note=Ydr365w-bp;inference=non-experimental evidence%2C no additional details recorded;product=Retrotransposon TYA Gag and TYB Pol genes%3B transcribed%2Ftranslated as one unit%3B polyprotein is processed to make a nucleocapsid-like pro
chr04	0.904249	0.982978	1206989	+	locus_tag=YDR365W-A;note=Ydr365w-ap;inference=non-experimental evidence%2C no additional details recorded;product=Retrotransposon TYA Gag gene co-transcribed with TYB Pol%3B translated as TYA or TYA-TYB polyprotein%3B Gag is a nucleocapsid protein that is
chr04	0.832517	0.838547	1212828	-	locus_tag=YDR366C;inference=non-experimental evidence%2C no additional details recorded;product=Ydr366cp;protein_id=NP_010654.1;db_xref=SGD:S000002774;db_xref=GI:6320574;db_xref=GeneID:851972;exon_number=1
chr04	0.990042	0.994689	1212840	+	locus_tag=YDR367W;note=Ydr367wp;inference=non-experimental evidence%2C no additional details recorded;product=Protein of unknown function%3B green fluorescent protein %28GFP%29-fusion protein localizes to the cytoplasm in a punctate pattern;protein_id=NP_
chr04	0.840096	0.844485	1213896	+	ID=NC_001136.8:YPR1:unknown_transcript_1;Parent=NC_001136.8:YPR1;locus_tag=YDR368W;note=Ypr1p;experiment=experimental evidence%2C no additional details recorded;product=2-methylbutyraldehyde reductase%2C may be involved in isoleucine catabolism;protein_id
chr04	0.957656	0.969873	1217572	-	ID=NC_001136.8:XRS2:unknown_transcript_1;Parent=NC_001136.8:XRS2;locus_tag=YDR369C;note=Xrs2p;experiment=experimental evidence%2C no additional details recorded;product=Protein required for DNA repair%3B component of the Mre11 complex%2C which is involved
chr04	0.908625	0.969901	1219102	-	locus_tag=YDR370C;note=Ydr370cp;inference=non-experimental evidence%2C no additional details recorded;product=Putative protein of unknown function;protein_id=NP_010658.1;db_xref=SGD:S000002778;db_xref=GI:6320578;db_xref=GeneID:851976;exon_number=1
chr04	0.865981	0.869908	1219405	+	ID=NC_001136.8:CTS2:unknown_transcript_1;Parent=NC_001136.8:CTS2;locus_tag=YDR371W;note=Sporulation-specific chitinase;experiment=experimental evidence%2C no additional details recorded;product=Cts2p;protein_id=NP_010659.1;db_xref=SGD:S000002779;db_xref=G
chr04	0.759125	0.883044	1222141	-	ID=NC_001136.8:VPS74:unknown_transcript_1;Parent=NC_001136.8:VPS74;locus_tag=YDR372C;gene_synonym=API1;note=Vps74p;experiment=experimental evidence%2C no additional details recorded;product=Non-essential protein of unknown function involved in vacuolar pr
chr04	0.839802	0.948516	1222751	+	ID=NC_001136.8:FRQ1:unknown_transcript_1;Parent=NC_001136.8:FRQ1;locus_tag=YDR373W;note=N-myristoylated calcium-binding protein that may have a role in intracellular signaling through its regulation of the phosphatidylinositol 4-kinase Pik1p%3B member of
chr04	0.932938	0.965198	1224386	-	locus_tag=YDR374C;note=Ydr374cp;inference=non-experimental evidence%2C no additional details recorded;product=Putative protein of unknown function;protein_id=NP_010662.1;db_xref=SGD:S000002782;db_xref=GI:6320582;db_xref=GeneID:851980;exon_number=1
chr04	0.806507	0.873479	1224749	+	locus_tag=YDR374W-A;note=Ydr374w-ap;inference=non-experimental evidence%2C no additional details recorded;product=Putative protein of unknown function;protein_id=NP_001032576.1;db_xref=SGD:S000113553;db_xref=GI:82795246;db_xref=GeneID:3799971;exon_number=
chr04	0.867427	0.848212	1226528	-	ID=NC_001136.8:BCS1:unknown_transcript_1;Parent=NC_001136.8:BCS1;locus_tag=YDR375C;note=Protein of the mitochondrial inner membrane that functions as an ATP-dependent chaperone%2C required for the incorporation of the Rip1p and Qcr10p subunits into the cy
chr04	0.700485	0.798715	1226814	+	ID=NC_001136.8:ARH1:unknown_transcript_1;Parent=NC_001136.8:ARH1;locus_tag=YDR376W;note=Oxidoreductase of the mitochondrial inner membrane%2C involved in cytoplasmic and mitochondrial iron homeostasis and required for activity of Fe-S cluster-containing e
chr04	0.950259	0.94044	1228603	+	ID=NC_001136.8:ATP17:unknown_transcript_1;Parent=NC_001136.8:ATP17;locus_tag=YDR377W;note=Subunit f of the F0 sector of mitochondrial F1F0 ATP synthase%2C which is a large%2C evolutionarily conserved enzyme complex required for ATP synthesis;experiment=ex
chr04	0.937083	0.966476	1229601	-	ID=NC_001136.8:LSM6:unknown_transcript_1;Parent=NC_001136.8:LSM6;locus_tag=YDR378C;note=Lsm6p;experiment=experimental evidence%2C no additional details recorded;product=Lsm %28Like Sm%29 protein%3B part of heteroheptameric complexes %28Lsm2p-7p and either
chr04	0.962899	0.97494	1230159	+	ID=NC_001136.8:RGA2:unknown_transcript_1;Parent=NC_001136.8:RGA2;locus_tag=YDR379W;note=Rga2p;experiment=experimental evidence%2C no additional details recorded;product=GTPase-activating protein for the polarity-establishment protein Cdc42p%3B implicated
chr04	0.768268	0.809202	1233509	-	locus_tag=YDR379C-A;note=hypothetical protein identified by homology. See FEBS Letters %5B2000%5D 487:31-36.;inference=non-experimental evidence%2C no additional details recorded;product=Ydr379c-ap;protein_id=NP_076888.1;db_xref=SGD:S000007605;db_xref=GI:
chr04	0.718338	0.722076	1234210	+	ID=NC_001136.8:ARO10:unknown_transcript_1;Parent=NC_001136.8:ARO10;locus_tag=YDR380W;note=Phenylpyruvate decarboxylase%2C catalyzes decarboxylation of phenylpyruvate to phenylacetaldehyde%2C which is the first specific step in the Ehrlich pathway;experime
chr04	0.775156	0.733819	1236550	+	ID=NC_001136.8:YRA1:unknown_transcript_1;Parent=NC_001136.8:YRA1;locus_tag=YDR381W;gene_synonym=SHE11;note=Yra1p;experiment=experimental evidence%2C no additional details recorded;product=Nuclear protein that binds to RNA and to Mex67p%2C required for exp
chr04	0.565288	0.916803	1238842	-	locus_tag=YDR381C-A;note=Ydr381c-ap;inference=non-experimental evidence%2C no additional details recorded;product=Protein of unknown function%2C localized to the mitochondrial outer membrane;protein_id=NP_219495.2;db_xref=SGD:S000007650;db_xref=GI:4162969
chr04	0.721601	0.926838	1239484	+	ID=NC_001136.8:RPP2B:unknown_transcript_1;Parent=NC_001136.8:RPP2B;locus_tag=YDR382W;gene_synonym=YPA1;gene_synonym=RPL45;note=Rpp2bp;experiment=experimental evidence%2C no additional details recorded;product=Ribosomal protein P2 beta%2C a component of th
chr04	0.858328	0.761428	1240668	-	ID=NC_001136.8:NKP1:unknown_transcript_1;Parent=NC_001136.8:NKP1;locus_tag=YDR383C;note=Non-essential kinetochore protein%2C subunit of the Ctf19 central kinetochore complex %28Ctf19p-Mcm21p-Okp1p-Mcm22p-Mcm16p-Ctf3p-Chl4p-Mcm19p-Nkp1p-Nkp2p-Ame1p-Mtw1p%2
chr04	0.426584	0.512339	1242023	-	ID=NC_001136.8:ATO3:unknown_transcript_1;Parent=NC_001136.8:ATO3;locus_tag=YDR384C;note=Plasma membrane protein%2C regulation pattern suggests a possible role in export of ammonia from the cell%3B phosphorylated in mitochondria%3B member of the TC 9.B.33
chr04	0.552135	0.738763	1243222	+	ID=NC_001136.8:EFT2:unknown_transcript_1;Parent=NC_001136.8:EFT2;locus_tag=YDR385W;note=Elongation factor 2 %28EF-2%29%2C also encoded by EFT1%3B catalyzes ribosomal translocation during protein synthesis%3B contains diphthamide%2C the unique posttranslat
chr04	0.880747	0.964795	1246076	+	ID=NC_001136.8:MUS81:unknown_transcript_1;Parent=NC_001136.8:MUS81;locus_tag=YDR386W;gene_synonym=SLX3;note=Mus81p;experiment=experimental evidence%2C no additional details recorded;product=Helix-hairpin-helix protein%2C involved in DNA repair and replica
chr04	0.734762	0.889083	1249813	-	locus_tag=YDR387C;note=Ydr387cp;inference=non-experimental evidence%2C no additional details recorded;product=Putative transporter%2C member of the sugar porter family%3B YDR387C is not an essential gene;protein_id=NP_010675.1;db_xref=SGD:S000002795;db_xr
chr04	0.734037	0.895698	1250178	+	ID=NC_001136.8:RVS167:unknown_transcript_1;Parent=NC_001136.8:RVS167;locus_tag=YDR388W;note=Rvs167p;experiment=experimental evidence%2C no additional details recorded;product=Actin-associated protein%2C subunit of a complex %28Rvs161p-Rvs167p%29 involved
chr04	0.0850099	0.232139	1252529	+	ID=NC_001136.8:SAC7:unknown_transcript_1;Parent=NC_001136.8:SAC7;locus_tag=YDR389W;note=Sac7p;experiment=experimental evidence%2C no additional details recorded;product=GTPase activating protein %28GAP%29 for Rho1p%2C involved in signaling to the actin cy
chr04	0.579552	0.815098	1256839	-	ID=NC_001136.8:UBA2:unknown_transcript_1;Parent=NC_001136.8:UBA2;locus_tag=YDR390C;gene_synonym=UAL1;note=Uba2p;experiment=experimental evidence%2C no additional details recorded;product=Nuclear protein that acts as a heterodimer with Aos1p to activate Sm
chr04	0.939031	0.945372	1258048	-	locus_tag=YDR391C;note=Ydr391cp;inference=non-experimental evidence%2C no additional details recorded;product=Putative protein of unknown function%2C possibly involved in zinc homeostasis%3B Bdf1p-dependent transcription induced by salt stress%3B green fl
chr04	0.934186	0.919785	1258688	+	ID=NC_001136.8:SPT3:unknown_transcript_1;Parent=NC_001136.8:SPT3;locus_tag=YDR392W;note=Subunit of the SAGA and SAGA-like transcriptional regulatory complexes%2C interacts with Spt15p to activate transcription of some RNA polymerase II-dependent genes%2C
chr04	0.897953	0.869119	1259893	+	ID=NC_001136.8:SHE9:unknown_transcript_1;Parent=NC_001136.8:SHE9;locus_tag=YDR393W;gene_synonym=MDM33;note=She9p;experiment=experimental evidence%2C no additional details recorded;product=Mitochondrial inner membrane protein required for normal mitochondr
chr04	0.943955	0.710673	1261673	+	ID=NC_001136.8:RPT3:unknown_transcript_1;Parent=NC_001136.8:RPT3;locus_tag=YDR394W;gene_synonym=YTA2;gene_synonym=YNT1;note=Rpt3p;experiment=experimental evidence%2C no additional details recorded;product=One of six ATPases of the 19S regulatory particle
chr04	0.919038	0.971098	1263316	+	ID=NC_001136.8:SXM1:unknown_transcript_1;Parent=NC_001136.8:SXM1;locus_tag=YDR395W;gene_synonym=KAP108;note=Sxm1p;experiment=experimental evidence%2C no additional details recorded;product=Nuclear transport factor %28karyopherin%29 involved in protein tra
chr04	0.966299	0.975133	1266890	-	ID=NC_001136.8:NCB2:unknown_transcript_1;Parent=NC_001136.8:NCB2;locus_tag=YDR397C;gene_synonym=YDR1;note=Subunit of a heterodimeric NC2 transcription regulator complex with Bur6p%3B complex binds to TBP and can repress transcription by preventing preinit
chr04	0.877689	0.982251	1267463	+	ID=NC_001136.8:UTP5:unknown_transcript_1;Parent=NC_001136.8:UTP5;locus_tag=YDR398W;note=Utp5p;experiment=experimental evidence%2C no additional details recorded;product=Nucleolar protein%2C component of the small subunit %28SSU%29 processome containing th
chr04	0.736467	0.697678	1270060	+	ID=NC_001136.8:HPT1:unknown_transcript_1;Parent=NC_001136.8:HPT1;locus_tag=YDR399W;gene_synonym=BRA6;note=Hpt1p;experiment=experimental evidence%2C no additional details recorded;product=Dimeric hypoxanthine-guanine phosphoribosyltransferase%2C catalyzes
chr04	0.889568	0.888639	1271055	+	ID=NC_001136.8:URH1:unknown_transcript_1;Parent=NC_001136.8:URH1;locus_tag=YDR400W;note=Uridine nucleosidase %28uridine-cytidine N-ribohydrolase%29%2C cleaves N-glycosidic bonds in nucleosides%3B involved in the pyrimidine salvage and nicotinamide ribosid
chr04	0.917004	0.901831	1273695	-	ID=NC_001136.8:DIT2:unknown_transcript_1;Parent=NC_001136.8:DIT2;locus_tag=YDR402C;gene_synonym=CYP56;EC_number=1.14.14.1;note=N-formyltyrosine oxidase%2C sporulation-specific microsomal enzyme involved in the production of N%2CN-bisformyl dityrosine requ
chr04	0.927904	0.905294	1274594	+	ID=NC_001136.8:DIT1:unknown_transcript_1;Parent=NC_001136.8:DIT1;locus_tag=YDR403W;note=Sporulation-specific enzyme required for spore wall maturation%2C involved in the production of a soluble LL-dityrosine-containing precursor of the spore wall%3B trans
chr04	0.758112	0.844927	1277161	-	ID=NC_001136.8:RPB7:unknown_transcript_1;Parent=NC_001136.8:RPB7;locus_tag=YDR404C;EC_number=2.7.7.6;note=Rpb7p;experiment=experimental evidence%2C no additional details recorded;product=RNA polymerase II subunit B16%3B forms two subunit dissociable compl
chr04	0.908675	0.883869	1277638	+	ID=NC_001136.8:MRP20:unknown_transcript_1;Parent=NC_001136.8:MRP20;locus_tag=YDR405W;note=Mrp20p;experiment=experimental evidence%2C no additional details recorded;product=Mitochondrial ribosomal protein of the large subunit;protein_id=NP_010693.1;db_xref
chr04	0.868157	0.968831	1279202	+	ID=NC_001136.8:PDR15:unknown_transcript_1;Parent=NC_001136.8:PDR15;locus_tag=YDR406W;note=Plasma membrane ATP binding cassette %28ABC%29 transporter%2C multidrug transporter and general stress response factor implicated in cellular detoxification%3B regul
chr04	0.770165	0.887049	1287930	-	ID=NC_001136.8:TRS120:unknown_transcript_1;Parent=NC_001136.8:TRS120;locus_tag=YDR407C;note=Trs120p;experiment=experimental evidence%2C no additional details recorded;product=One of 10 subunits of the transport protein particle %28TRAPP%29 complex of the
chr04	0.861758	0.904855	1288851	-	ID=NC_001136.8:ADE8:unknown_transcript_1;Parent=NC_001136.8:ADE8;locus_tag=YDR408C;EC_number=2.1.2.2;note=Phosphoribosyl-glycinamide transformylase%2C catalyzes a step in the %27de novo%27 purine nucleotide biosynthetic pathway;experiment=experimental evi
chr04	0.714004	0.867591	1289398	+	ID=NC_001136.8:SIZ1:unknown_transcript_1;Parent=NC_001136.8:SIZ1;locus_tag=YDR409W;gene_synonym=ULL1;note=Siz1p;experiment=experimental evidence%2C no additional details recorded;product=SUMO%2FSmt3 ligase that promotes the attachment of sumo %28Smt3p%3B
chr04	0.946698	0.962827	1293083	-	ID=NC_001136.8:STE14:unknown_transcript_1;Parent=NC_001136.8:STE14;locus_tag=YDR410C;EC_number=2.1.1.100;note=Ste14p;experiment=experimental evidence%2C no additional details recorded;product=Farnesyl cysteine-carboxyl methyltransferase%2C mediates the ca
chr04	0.701687	0.950192	1294386	-	ID=NC_001136.8:DFM1:unknown_transcript_1;Parent=NC_001136.8:DFM1;locus_tag=YDR411C;note=ER localized derlin-like family member involved in ER stress and homeostasis%3B not involved in ERAD or substrate retrotranslocation%3B interacts with CDC48%3B contain
chr04	0.960468	0.876197	1294685	+	ID=NC_001136.8:RRP17:unknown_transcript_1;Parent=NC_001136.8:RRP17;locus_tag=YDR412W;note=Rrp17p;experiment=experimental evidence%2C no additional details recorded;product=Protein required for cell viability;protein_id=NP_010700.1;db_xref=SGD:S000002820;d
chr04	0.951591	0.909555	1296678	-	ID=NC_001136.8:ERD1:unknown_transcript_1;Parent=NC_001136.8:ERD1;locus_tag=YDR414C;gene_synonym=LDB2;note=Predicted membrane protein required for the retention of lumenal endoplasmic reticulum proteins%3B mutants secrete the endogenous ER protein%2C BiP %
chr04	0.794011	0.917684	1298153	-	locus_tag=YDR415C;note=Ydr415cp;inference=non-experimental evidence%2C no additional details recorded;product=Putative protein of unknown function;protein_id=NP_010703.1;db_xref=SGD:S000002823;db_xref=GI:6320623;db_xref=GeneID:852024;exon_number=1
chr04	0.871695	0.61006	1298424	+	ID=NC_001136.8:SYF1:unknown_transcript_1;Parent=NC_001136.8:SYF1;locus_tag=YDR416W;gene_synonym=NTC90;note=Syf1p;experiment=experimental evidence%2C no additional details recorded;product=Component of the spliceosome complex involved in pre-mRNA splicing%
chr04	0.83439	0.966346	1301608	+	ID=NC_001136.8:RPL12B:unknown_transcript_1;Parent=NC_001136.8:RPL12B;locus_tag=YDR418W;note=Rpl12bp;experiment=experimental evidence%2C no additional details recorded;product=Protein component of the large %2860S%29 ribosomal subunit%2C nearly identical t
chr04	0.826416	0.974057	1303166	+	ID=NC_001136.8:RAD30:unknown_transcript_1;Parent=NC_001136.8:RAD30;locus_tag=YDR419W;gene_synonym=DBH1;note=Rad30p;experiment=experimental evidence%2C no additional details recorded;product=DNA polymerase eta%2C involved in the predominantly error-free by
chr04	0.971217	0.991887	1306259	+	ID=NC_001136.8:HKR1:unknown_transcript_1;Parent=NC_001136.8:HKR1;locus_tag=YDR420W;note=Serine%2Fthreonine rich cell surface protein%3B osmosensor%3B involved in the regulation of cell wall beta-1%2C3 glucan synthesis%2C bud site selection and hyperosmoti
chr04	0.89417	0.970932	1312032	+	ID=NC_001136.8:ARO80:unknown_transcript_1;Parent=NC_001136.8:ARO80;locus_tag=YDR421W;note=Zinc finger transcriptional activator of the Zn2Cys6 family%3B activates transcription of aromatic amino acid catabolic genes in the presence of aromatic amino acids
chr04	0.844392	0.969934	1317765	-	ID=NC_001136.8:SIP1:unknown_transcript_1;Parent=NC_001136.8:SIP1;locus_tag=YDR422C;note=Sip1p;experiment=experimental evidence%2C no additional details recorded;product=Alternate beta-subunit of the Snf1p kinase complex%2C may confer substrate specificity
chr04	0.814036	0.955142	1319267	-	ID=NC_001136.8:CAD1:unknown_transcript_1;Parent=NC_001136.8:CAD1;locus_tag=YDR423C;gene_synonym=YAP2;note=Cad1p;experiment=experimental evidence%2C no additional details recorded;product=AP-1-like bZIP transcriptional activator involved in stress response
chr04	0.966882	0.989813	1319833	-	ID=NC_001136.8:DYN2:unknown_transcript_1;Parent=NC_001136.8:DYN2;locus_tag=YDR424C;gene_synonym=SLC1;note=Dyn2p;experiment=experimental evidence%2C no additional details recorded;product=Cytoplasmic light chain dynein%2C microtubule motor protein%3B propo
chr04	0.676774	0.826167	1320056	+	ID=NC_001136.8:SNX41:unknown_transcript_1;Parent=NC_001136.8:SNX41;locus_tag=YDR425W;note=Sorting nexin%2C involved in the retrieval of late-Golgi SNAREs from the post-Golgi endosome to the trans-Golgi network%3B forms a complex with Snx4p and Atg20p;expe
chr04	0.782424	0.840509	1322197	+	ID=NC_001136.8:RPN9:unknown_transcript_1;Parent=NC_001136.8:RPN9;locus_tag=YDR427W;note=Rpn9p;experiment=experimental evidence%2C no additional details recorded;product=Non-ATPase regulatory subunit of the 26S proteasome%2C has similarity to putative prot
chr04	0.799348	0.797736	1324231	-	locus_tag=YDR428C;note=Ydr428cp;inference=non-experimental evidence%2C no additional details recorded;product=Putative alpha%2Fbeta-serine hydrolase belonging to the subfamily of hormone-sensitive lipase-like hydrolases;protein_id=NP_010716.1;db_xref=SGD:
chr04	0.892945	0.974675	1325293	-	ID=NC_001136.8:TIF35:unknown_transcript_1;Parent=NC_001136.8:TIF35;locus_tag=YDR429C;note=Tif35p;experiment=experimental evidence%2C no additional details recorded;product=Subunit of the core complex of translation initiation factor 3%28eIF3%29%2C which i
chr04	0.910421	0.940778	1328462	-	ID=NC_001136.8:CYM1:unknown_transcript_1;Parent=NC_001136.8:CYM1;locus_tag=YDR430C;gene_synonym=MOP112;note=Lysine-specific metalloprotease of the mitochondrial intermembrane space%2C member of the pitrilysin family%3B degrades proteins and presequence pe
chr04	0.955729	0.982172	1328775	+	ID=NC_001136.8:NPL3:unknown_transcript_1;Parent=NC_001136.8:NPL3;locus_tag=YDR432W;gene_synonym=NAB1;gene_synonym=NOP3;gene_synonym=MTS1;gene_synonym=MTR13;note=RNA-binding protein that carries poly%28A%29%2B mRNA from the nucleus into the cytoplasm%3B di
chr04	0.824994	0.950567	1331229	+	ID=NC_001136.8:GPI17:unknown_transcript_1;Parent=NC_001136.8:GPI17;locus_tag=YDR434W;note=Transmembrane protein subunit of the glycosylphosphatidylinositol transamidase complex that adds GPIs to newly synthesized proteins%3B human PIG-Sp homolog;experimen
chr04	0.704018	0.826895	1333961	-	ID=NC_001136.8:PPM1:unknown_transcript_1;Parent=NC_001136.8:PPM1;locus_tag=YDR435C;note=Ppm1p;experiment=experimental evidence%2C no additional details recorded;product=Carboxyl methyl transferase%2C methylates the C terminus of the protein phosphatase 2A
chr04	0.830248	0.867883	1334813	+	ID=NC_001136.8:PPZ2:unknown_transcript_1;Parent=NC_001136.8:PPZ2;locus_tag=YDR436W;EC_number=3.1.3.16;note=Serine%2Fthreonine protein phosphatase Z%2C isoform of Ppz1p%3B involved in regulation of potassium transport%2C which affects osmotic stability%2C
chr04	0.769676	0.891196	1337344	+	ID=NC_001136.8:GPI19:unknown_transcript_1;Parent=NC_001136.8:GPI19;locus_tag=YDR437W;note=Subunit of GPI-GlcNAc transferase involved in synthesis of N-acetylglucosaminyl phosphatidylinositol %28GlcNAc-PI%29%2C which is the first intermediate in glycosylph
chr04	0.971627	0.989041	1338266	+	ID=NC_001136.8:THI74:unknown_transcript_1;Parent=NC_001136.8:THI74;locus_tag=YDR438W;note=Thi74p;experiment=experimental evidence%2C no additional details recorded;product=Mitochondrial transporter repressible by thiamine;protein_id=NP_010726.1;db_xref=SG
chr04	0.862156	0.845687	1339668	+	ID=NC_001136.8:LRS4:unknown_transcript_1;Parent=NC_001136.8:LRS4;locus_tag=YDR439W;note=Protein involved in rDNA silencing%3B positively charged coiled-coil protein with limited similarity to myosin;experiment=experimental evidence%2C no additional detail
chr04	0.854226	0.788054	1342485	+	ID=NC_001136.8:DOT1:unknown_transcript_1;Parent=NC_001136.8:DOT1;locus_tag=YDR440W;gene_synonym=PCH1;note=Nucleosomal histone H3-Lys79 methylase%2C associates with transcriptionally active genes%2C functions in gene silencing at telomeres%2C most likely b
chr04	0.714769	0.933014	1345054	-	ID=NC_001136.8:APT2:unknown_transcript_1;Parent=NC_001136.8:APT2;locus_tag=YDR441C;EC_number=2.4.2.7;note=Apt2p;experiment=experimental evidence%2C no additional details recorded;product=Apparent pseudogene%2C not transcribed or translated under normal co
chr04	0.801567	0.943263	1349930	-	ID=NC_001136.8:SSN2:unknown_transcript_1;Parent=NC_001136.8:SSN2;locus_tag=YDR443C;gene_synonym=MED13;gene_synonym=RYE3;gene_synonym=UME2;gene_synonym=SRB9;gene_synonym=SCA1;gene_synonym=NUT8;note=Subunit of the RNA polymerase II mediator complex%3B assoc
chr04	0.973566	0.976502	1350282	+	locus_tag=YDR444W;note=Ydr444wp;inference=non-experimental evidence%2C no additional details recorded;product=Putative protein of unknown function;protein_id=NP_010732.1;db_xref=SGD:S000002852;db_xref=GI:6320652;db_xref=GeneID:852054;exon_number=1
chr04	0.927264	0.984702	1353717	+	ID=NC_001136.8:ECM11:unknown_transcript_1;Parent=NC_001136.8:ECM11;locus_tag=YDR446W;note=Non-essential protein apparently involved in meiosis%2C GFP fusion protein is present in discrete clusters in the nucleus throughout mitosis%3B may be involved in ma
chr04	0.782702	0.570779	1355545	-	ID=NC_001136.8:RPS17B:unknown_transcript_1;Parent=NC_001136.8:RPS17B;locus_tag=YDR447C;gene_synonym=RPL51B;gene_synonym=RP51B;note=Rps17bp;experiment=experimental evidence%2C no additional details recorded;product=Ribosomal protein 51 %28rp51%29 of the sm
chr04	0.780392	0.78499	1356057	+	ID=NC_001136.8:ADA2:unknown_transcript_1;Parent=NC_001136.8:ADA2;locus_tag=YDR448W;gene_synonym=SWI8;note=Transcription coactivator%2C component of the ADA and SAGA transcriptional adaptor%2FHAT %28histone acetyltransferase%29 complexes;experiment=experim
chr04	0.794487	0.827906	1358894	-	ID=NC_001136.8:UTP6:unknown_transcript_1;Parent=NC_001136.8:UTP6;locus_tag=YDR449C;note=Utp6p;experiment=experimental evidence%2C no additional details recorded;product=Nucleolar protein%2C component of the small subunit %28SSU%29 processome containing th
chr04	0.791316	0.834641	1359915	+	ID=NC_001136.8:RPS18A:unknown_transcript_1;Parent=NC_001136.8:RPS18A;locus_tag=YDR450W;note=Rps18ap;experiment=experimental evidence%2C no additional details recorded;product=Protein component of the small %2840S%29 ribosomal subunit%3B nearly identical t
chr04	0.804076	0.956495	1362173	-	ID=NC_001136.8:YHP1:unknown_transcript_1;Parent=NC_001136.8:YHP1;locus_tag=YDR451C;note=Yhp1p;experiment=experimental evidence%2C no additional details recorded;product=One of two homeobox transcriptional repressors %28see also Yox1p%29%2C that bind to Mc
chr04	0.848017	0.965961	1362870	+	ID=NC_001136.8:PPN1:unknown_transcript_1;Parent=NC_001136.8:PPN1;locus_tag=YDR452W;gene_synonym=PHM5;note=Vacuolar endopolyphosphatase with a role in phosphate metabolism%3B functions as a homodimer;experiment=experimental evidence%2C no additional detail
chr04	0.952661	0.954481	1365654	-	ID=NC_001136.8:TSA2:unknown_transcript_1;Parent=NC_001136.8:TSA2;locus_tag=YDR453C;note=Tsa2p;experiment=experimental evidence%2C no additional details recorded;product=Stress inducible cytoplasmic thioredoxin peroxidase%3B cooperates with Tsa1p in the re
chr04	0.899823	0.844864	1366819	-	ID=NC_001136.8:GUK1:unknown_transcript_1;Parent=NC_001136.8:GUK1;locus_tag=YDR454C;gene_synonym=PUR5;EC_number=2.7.4.8;note=Guk1p;experiment=experimental evidence%2C no additional details recorded;product=Guanylate kinase%2C converts GMP to GDP%3B require
chr04	0.668144	0.779775	1367477	+	ID=NC_001136.8:NHX1:unknown_transcript_1;Parent=NC_001136.8:NHX1;locus_tag=YDR456W;gene_synonym=VPL27;gene_synonym=NHA2;gene_synonym=VPS44;note=Nhx1p;experiment=experimental evidence%2C no additional details recorded;product=Endosomal Na%2B%2FH%2B exchang
chr04	0.868662	0.962059	1369782	+	ID=NC_001136.8:TOM1:unknown_transcript_1;Parent=NC_001136.8:TOM1;locus_tag=YDR457W;note=Tom1p;experiment=experimental evidence%2C no additional details recorded;product=E3 ubiquitin ligase of the hect-domain class%3B has a role in mRNA export from the nuc
chr04	0.939941	0.922808	1382038	-	ID=NC_001136.8:HEH2:unknown_transcript_1;Parent=NC_001136.8:HEH2;locus_tag=YDR458C;note=Inner nuclear membrane %28INM%29 protein%3B contains helix-extension-helix %28HEH%29 motif%2C nuclear localization signal sequence%3B targeting to the INM requires the
chr04	0.90888	0.949697	1383435	-	ID=NC_001136.8:PFA5:unknown_transcript_1;Parent=NC_001136.8:PFA5;locus_tag=YDR459C;note=Pfa5p;experiment=experimental evidence%2C no additional details recorded;product=Palmitoyltransferase with autoacylation activity%3B likely functions in pathway%28s%29
chr04	0.857532	0.939315	1383803	+	ID=NC_001136.8:TFB3:unknown_transcript_1;Parent=NC_001136.8:TFB3;locus_tag=YDR460W;gene_synonym=RIG2;note=Tfb3p;experiment=experimental evidence%2C no additional details recorded;product=Subunit of TFIIH and nucleotide excision repair factor 3 complexes%2
chr04	0.649329	0.777564	1385168	+	ID=NC_001136.8:MFA1:unknown_transcript_1;Parent=NC_001136.8:MFA1;locus_tag=YDR461W;note=Mfa1p;experiment=experimental evidence%2C no additional details recorded;product=Mating pheromone a-factor%2C made by a cells%3B interacts with alpha cells to induce c
chr04	0.931082	0.931408	1385758	-	locus_tag=YDR461C-A;note=Ydr461c-ap;inference=non-experimental evidence%2C no additional details recorded;product=Putative protein of unknown function;protein_id=NP_001032577.1;db_xref=SGD:S000087209;db_xref=GI:82795248;db_xref=GeneID:3799972;exon_number=
chr04	0.803554	0.886431	1386065	+	ID=NC_001136.8:MRPL28:unknown_transcript_1;Parent=NC_001136.8:MRPL28;locus_tag=YDR462W;note=Mrpl28p;experiment=experimental evidence%2C no additional details recorded;product=Mitochondrial ribosomal protein of the large subunit;protein_id=NP_010750.1;db_x
chr04	0.923691	0.915997	1386808	+	ID=NC_001136.8:STP1:unknown_transcript_1;Parent=NC_001136.8:STP1;locus_tag=YDR463W;gene_synonym=SSY2;gene_synonym=BAP1;note=Transcription factor%2C activated by proteolytic processing in response to signals from the SPS sensor system for external amino ac
chr04	0.870084	0.9215	1388864	+	ID=NC_001136.8:SPP41:unknown_transcript_1;Parent=NC_001136.8:SPP41;locus_tag=YDR464W;note=Spp41p;experiment=experimental evidence%2C no additional details recorded;product=Protein involved in negative regulation of expression of spliceosome components PRP
chr04	0.946011	0.967303	1394566	-	ID=NC_001136.8:RMT2:unknown_transcript_1;Parent=NC_001136.8:RMT2;locus_tag=YDR465C;note=Rmt2p;experiment=experimental evidence%2C no additional details recorded;product=Arginine methyltransferase%3B ribosomal protein L12 is a substrate;protein_id=NP_01075
chr04	0.929733	0.979662	1395113	+	ID=NC_001136.8:PKH3:unknown_transcript_1;Parent=NC_001136.8:PKH3;locus_tag=YDR466W;note=Protein kinase with similarity to mammalian phosphoinositide-dependent kinase 1 %28PDK1%29 and yeast Pkh1p and Pkh2p%2C two redundant upstream activators of Pkc1p%3B i
chr04	0.928263	0.929093	1398692	-	ID=NC_001136.8:TLG1:unknown_transcript_1;Parent=NC_001136.8:TLG1;locus_tag=YDR468C;note=Tlg1p;experiment=experimental evidence%2C no additional details recorded;product=Essential t-SNARE that forms a complex with Tlg2p and Vti1p and mediates fusion of end
chr04	0.79804	0.825738	1399007	+	ID=NC_001136.8:SDC1:unknown_transcript_1;Parent=NC_001136.8:SDC1;locus_tag=YDR469W;gene_synonym=SAF19;gene_synonym=CPS25;note=Subunit of the COMPASS %28Set1C%29 complex%2C which methylates histone H3 on lysine 4 and is required in transcriptional silencin
chr04	0.31187	0.623468	1401206	-	ID=NC_001136.8:UGO1:unknown_transcript_1;Parent=NC_001136.8:UGO1;locus_tag=YDR470C;note=Ugo1p;experiment=experimental evidence%2C no additional details recorded;product=Protein of unknown function%3B outer membrane component of the mitochondrial fusion ma
chr04	0.561534	0.806995	1401762	+	ID=NC_001136.8:RPL27B:unknown_transcript_1;Parent=NC_001136.8:RPL27B;locus_tag=YDR471W;note=Rpl27bp;experiment=experimental evidence%2C no additional details recorded;product=Protein component of the large %2860S%29 ribosomal subunit%2C nearly identical t
chr04	0.693106	0.83025	1403314	+	ID=NC_001136.8:TRS31:unknown_transcript_1;Parent=NC_001136.8:TRS31;locus_tag=YDR472W;note=Trs31p;experiment=experimental evidence%2C no additional details recorded;product=One of 10 subunits of the transport protein particle %28TRAPP%29 complex of the cis
chr04	0.903811	0.89042	1405846	-	ID=NC_001136.8:PRP3:unknown_transcript_1;Parent=NC_001136.8:PRP3;locus_tag=YDR473C;gene_synonym=RNA3;note=Splicing factor%2C component of the U4%2FU6-U5 snRNP complex;experiment=experimental evidence%2C no additional details recorded;product=Prp3p;protein
chr04	0.700989	0.939373	1410086	-	ID=NC_001136.8:JIP4:unknown_transcript_1;Parent=NC_001136.8:JIP4;locus_tag=YDR475C;gene_synonym=YDR474C;note=Protein of unknown function%3B previously annotated as two separate ORFs%2C YDR474C and YDR475C%2C which were merged as a result of corrections to
chr04	0.96994	0.964679	1411119	-	locus_tag=YDR476C;note=Ydr476cp;inference=non-experimental evidence%2C no additional details recorded;product=Putative protein of unknown function%3B green fluorescent protein %28GFP%29-fusion protein localizes to the endoplasmic reticulum%3B YDR476C is n
chr04	0.954743	0.979244	1412365	+	ID=NC_001136.8:SNF1:unknown_transcript_1;Parent=NC_001136.8:SNF1;locus_tag=YDR477W;gene_synonym=PAS14;gene_synonym=HAF3;gene_synonym=GLC2;gene_synonym=CCR1;gene_synonym=CAT1;EC_number=2.7.1.-;note=Snf1p;experiment=experimental evidence%2C no additional de
chr04	0.685757	0.890529	1414567	+	ID=NC_001136.8:SNM1:unknown_transcript_1;Parent=NC_001136.8:SNM1;locus_tag=YDR478W;note=Subunit of RNase MRP%2C which cleaves pre-rRNA and has a role in cell cycle-regulated degradation of daughter cell-specific mRNAs%3B binds to the NME1 RNA subunit of R
chr04	0.977461	0.994502	1416866	-	ID=NC_001136.8:PEX29:unknown_transcript_1;Parent=NC_001136.8:PEX29;locus_tag=YDR479C;note=Pex29p;experiment=experimental evidence%2C no additional details recorded;product=Peroxisomal integral membrane peroxin%2C involved in the regulation of peroxisomal
chr04	0.967727	0.986953	1417391	+	ID=NC_001136.8:DIG2:unknown_transcript_1;Parent=NC_001136.8:DIG2;locus_tag=YDR480W;gene_synonym=RST2;note=Regulatory protein of unknown function%2C pheromone-inducible%2C involved in the regulation of mating-specific genes and the invasive growth pathway%
chr04	0.958511	0.913322	1420242	-	ID=NC_001136.8:PHO8:unknown_transcript_1;Parent=NC_001136.8:PHO8;locus_tag=YDR481C;EC_number=3.1.3.1;note=Repressible alkaline phosphatase%2C a glycoprotein localized to the vacuole%3B regulated by levels of inorganic phosphate and by a system consisting
chr04	0.772783	0.773602	1420830	-	ID=NC_001136.8:CWC21:unknown_transcript_1;Parent=NC_001136.8:CWC21;locus_tag=YDR482C;note=Cwc21p;experiment=experimental evidence%2C no additional details recorded;product=Component of a complex containing Cef1p%2C putatively involved in pre-mRNA splicing
chr04	0.956829	0.896225	1421149	+	ID=NC_001136.8:KRE2:unknown_transcript_1;Parent=NC_001136.8:KRE2;locus_tag=YDR483W;gene_synonym=MNT1;EC_number=2.4.1.131;note=Kre2p;experiment=experimental evidence%2C no additional details recorded;product=Alpha1%2C2-mannosyltransferase of the Golgi invo
chr04	0.454756	0.907639	1422755	+	ID=NC_001136.8:VPS52:unknown_transcript_1;Parent=NC_001136.8:VPS52;locus_tag=YDR484W;gene_synonym=SAC2;note=Vps52p;experiment=experimental evidence%2C no additional details recorded;product=Component of the GARP %28Golgi-associated retrograde protein%29 c
chr04	0.91626	0.908754	1427199	-	ID=NC_001136.8:VPS72:unknown_transcript_1;Parent=NC_001136.8:VPS72;locus_tag=YDR485C;gene_synonym=SWC2;note=Vps72p;experiment=experimental evidence%2C no additional details recorded;product=Htz1p-binding component of the SWR1 complex%2C which exchanges hi
chr04	0.920486	0.831752	1428112	-	ID=NC_001136.8:VPS60:unknown_transcript_1;Parent=NC_001136.8:VPS60;locus_tag=YDR486C;gene_synonym=CHM5;gene_synonym=MOS10;note=Vps60p;experiment=experimental evidence%2C no additional details recorded;product=Cytoplasmic and vacuolar membrane protein invo
chr04	0.692516	0.703923	1428972	-	ID=NC_001136.8:RIB3:unknown_transcript_1;Parent=NC_001136.8:RIB3;locus_tag=YDR487C;note=Rib3p;experiment=experimental evidence%2C no additional details recorded;product=3%2C4-dihydroxy-2-butanone-4-phosphate synthase %28DHBP synthase%29%2C required for ri
chr04	0.983115	0.979187	1430781	-	ID=NC_001136.8:PAC11:unknown_transcript_1;Parent=NC_001136.8:PAC11;locus_tag=YDR488C;note=Pac11p;experiment=experimental evidence%2C no additional details recorded;product=Dynein intermediate chain%2C acts in the cytoplasmic dynein pathway%2C forms cortic
chr04	0.849667	0.862736	1431004	+	ID=NC_001136.8:SLD5:unknown_transcript_1;Parent=NC_001136.8:SLD5;locus_tag=YDR489W;gene_synonym=CDC105;note=Subunit of the GINS complex %28Sld5p%2C Psf1p%2C Psf2p%2C Psf3p%29%2C which is localized to DNA replication origins and implicated in assembly of t
chr04	0.906174	0.880606	1434260	-	ID=NC_001136.8:PKH1:unknown_transcript_1;Parent=NC_001136.8:PKH1;locus_tag=YDR490C;note=Serine%2Fthreonine protein kinase involved in sphingolipid-mediated signaling pathway that controls endocytosis%3B activates Ypk1p and Ykr2p%2C components of signaling
chr04	0.808303	0.78695	1434916	+	ID=NC_001136.8:IZH1:unknown_transcript_1;Parent=NC_001136.8:IZH1;locus_tag=YDR492W;note=Membrane protein involved in zinc metabolism%2C member of the four-protein IZH family%3B transcription is regulated directly by Zap1p%2C expression induced by zinc def
chr04	0.614592	0.792023	1436209	+	ID=NC_001136.8:AIM8:unknown_transcript_1;Parent=NC_001136.8:AIM8;locus_tag=YDR493W;note=Protein of unknown function%3B non-tagged protein detected in purified mitochondria in high-throughput studies%3B null mutant displays decreased frequency of mitochond
chr04	0.905163	0.90539	1436922	+	ID=NC_001136.8:RSM28:unknown_transcript_1;Parent=NC_001136.8:RSM28;locus_tag=YDR494W;note=Rsm28p;experiment=experimental evidence%2C no additional details recorded;product=Mitochondrial ribosomal protein of the small subunit%3B genetic interactions sugges
chr04	0.747499	0.808079	1441142	-	ID=NC_001136.8:VPS3:unknown_transcript_1;Parent=NC_001136.8:VPS3;locus_tag=YDR495C;gene_synonym=VPT17;gene_synonym=VPL3;gene_synonym=PEP6;note=Vps3p;experiment=experimental evidence%2C no additional details recorded;product=Component of CORVET tethering c
[truncated: 4,497 more rows]
